# Supplementary material
Source: publisher figshare collection journal article supplement (https://gsajournals.figshare.com/ndownloader/files/17294624)
Supplement: Supplementary file 1 [file 17294624]

## Sheet: ZFishSkin.net-FileS6
MAJOR STAGE —>		Flow	Flow	Classify	Classify	Classify		Ensembl92	Ensembl92	Ensembl92	Ensembl92	Ensembl92	Ensembl92	Ensembl92	Ensembl92	Ensembl92
AND NOTES —>		classify	classify	at 20SS	at 52hpf	at 72hpf		ENSDARG info.	ENSDARG info.	ENSDARG info.	ENSDARG info.	ENSDARG info.	ENSDARG info.	ENSDARG info.	ENSDARG info.	‘^’-separated
			FLOW	20SS	52hpf	72hpf
			ORDERING	ORDERING	ORDERING	ORDERING
Ens92gene		FLOW	VALUE	VALUE	VALUE	VALUE		ENSDARGwithVersion	descriptionWithoutSourceOrAccessionSuffix	descriptionAccession	altlongName	synonyms	biotype	analysis	canonicalENSDART	Ens92transcripts
ENSDARG00000000001		NNN	0.100701	0.428779	0.100701	0.572199		ENSDARG00000000001.6	solute carrier family 35, member A5	ZDB-GENE-030616-55	slc35a5	RP71-20I5.1;ZDB-GENE-030616-55	protein_coding	ensembl_havana_gene	ENSDART00000000004.5	ENSDART00000000004
ENSDARG00000000002		NNN	0.0219723	0.0219723	0.444679	0.65378		ENSDARG00000000002.8	coiled-coil domain containing 80	ZDB-GENE-030616-56	RP71-20I5.2	—	protein_coding	ensembl_havana_gene	ENSDART00000000005.7	ENSDART00000000005
ENSDARG00000000018		NNN	0.999801	0.999801	1	1		ENSDARG00000000018.9	nuclear respiratory factor 1	ZDB-GENE-001221-1	nrf1	ZDB-GENE-001221-1	protein_coding	ensembl_havana_gene	ENSDART00000138183.2	ENSDART00000138183^ENSDART00000181044
ENSDARG00000000019		NNN	0.906828	0.930791	0.906828	0.997504		ENSDARG00000000019.9	ubiquitin-conjugating enzyme E2H (UBC8 homolog, yeast)	ZDB-GENE-030616-67	ube2h	ZDB-GENE-030616-67	protein_coding	ensembl_havana_gene	ENSDART00000124452.3	ENSDART00000124452
ENSDARG00000000068		NNN	0.0341751	0.99532	0.0341751	0.509082		ENSDARG00000000068.9	solute carrier family 9, subfamily A (NHE3, cation proton antiporter 3), member 3 regulator 1a	ZDB-GENE-031006-7	slc9a3r2	—	protein_coding	ensembl_havana_gene	ENSDART00000000069.8	ENSDART00000000069^ENSDART00000136272
ENSDARG00000000069		NNN	0.441456	0.76791	0.441456	0.798354		ENSDARG00000000069.7	death-associated protein	ZDB-GENE-000511-3	dap1a	ZDB-GENE-000511-3	protein_coding	ensembl_havana_gene	ENSDART00000000070.7	ENSDART00000000070^ENSDART00000134964^ENSDART00000140891^ENSDART00000142631
ENSDARG00000000086		NNN	0.904647	0.904647	0.998332	0.999728		ENSDARG00000000086.12	intersectin 1 (SH3 domain protein)	ZDB-GENE-030616-226	itsn1	ZDB-GENE-030616-226	protein_coding	ensembl_havana_gene	ENSDART00000132378.4	ENSDART00000132378^ENSDART00000139573^ENSDART00000150545^ENSDART00000160817
ENSDARG00000000103		NNN	0.997912	0.997912	1	1		ENSDARG00000000103.12	myosin, heavy chain 10, non-muscle	ZDB-GENE-030616-162	myh10	ZDB-GENE-030616-162	protein_coding	ensembl_havana_gene	ENSDART00000151114.2	ENSDART00000150939^ENSDART00000151114^ENSDART00000151635^ENSDART00000187590
ENSDARG00000000142		NNN	0.943501	0.943501	0.999998	0.999998		ENSDARG00000000142.10	transmembrane protein 267	ZDB-GENE-030616-546	DKEYP-84G6.3	ZDB-GENE-030616-546	protein_coding	ensembl_havana_gene	ENSDART00000135082.2	ENSDART00000135082^ENSDART00000186615
ENSDARG00000000151		NNN	0.0724145	0.701279	0.0724145	0.130773		ENSDARG00000000151.14	thyroid hormone receptor alpha a	ZDB-GENE-990415-263	thra	ZDB-GENE-990415-263	protein_coding	ensembl_havana_gene	ENSDART00000000160.10	ENSDART00000000160^ENSDART00000151127^ENSDART00000151575^ENSDART00000151633^ENSDART00000177021
ENSDARG00000000161		NNN	0.974785	0.974785	0.999346	0.998062		ENSDARG00000000161.13	intersectin 2a	ZDB-GENE-041014-84	itsn2a	ZDB-GENE-041014-84	protein_coding	ensembl_havana_gene	ENSDART00000062780.7	ENSDART00000062780^ENSDART00000125142^ENSDART00000153266^ENSDART00000180278
ENSDARG00000000175		NNN	0.984968	0.984968	1	1		ENSDARG00000000175.10	homeobox B2a	ZDB-GENE-990415-103	hoxb2a	—	protein_coding	ensembl_havana_gene	ENSDART00000146636.2	ENSDART00000146636
ENSDARG00000000183		NNN	0.246998	0.246998	0.99855	0.999999		ENSDARG00000000183.15	protein tyrosine phosphatase, non-receptor type 4b	ZDB-GENE-030131-6259	RP71-1N18.2	—	protein_coding	ensembl_havana_gene	ENSDART00000125423.4	ENSDART00000000192^ENSDART00000125423^ENSDART00000126784
ENSDARG00000000189		SNN	0.644053	0.998764	0.644053	0.919955		ENSDARG00000000189.12	sema domain, transmembrane domain (TM), and cytoplasmic domain, (semaphorin) 6E	ZDB-GENE-040724-119	sema6dl	ZDB-GENE-050417-171	protein_coding	ensembl_havana_gene	ENSDART00000160555.2	ENSDART00000000198^ENSDART00000135723^ENSDART00000160555
ENSDARG00000000212		SGG	0.512405	0.999899	0.512405	0.530883		ENSDARG00000000212.11	keratin 97	ZDB-GENE-040718-78	CH73-78I5.4	—	protein_coding	ensembl_havana_gene	ENSDART00000105808.4	ENSDART00000105808
ENSDARG00000000229		NNN	0.999147	0.999147	1	1		ENSDARG00000000229.9	ubiquitin specific peptidase 49	ZDB-GENE-050208-484	RP71-11B17.7	—	protein_coding	ensembl_havana_gene	ENSDART00000037069.5	ENSDART00000037069^ENSDART00000171036
ENSDARG00000000241		NPN	0.0964988	0.307268	0.980778	0.0964988		ENSDARG00000000241.12	solute carrier family 40 (iron-regulated transporter), member 1	ZDB-GENE-000511-8	slc40a1	ZDB-GENE-000511-8	protein_coding	ensembl_havana_gene	ENSDART00000000250.10	ENSDART00000000250
ENSDARG00000000324		NNN	0.945623	0.945623	0.981581	0.999706		ENSDARG00000000324.10	DDB1 and CUL4 associated factor 8	ZDB-GENE-070912-578	—	—	protein_coding	ensembl	ENSDART00000139564.2	ENSDART00000139564
ENSDARG00000000349		NNN	0.32478	0.998253	0.675129	0.32478		ENSDARG00000000349.8	si:rp71-1p14.7	ZDB-GENE-040724-203	CH73-59N7.4	ZDB-GENE-040724-203	protein_coding	ensembl_havana_gene	ENSDART00000151109.2	ENSDART00000151109
ENSDARG00000000369		NGB	0.0667493	0.198641	0.0667493	0.998634		ENSDARG00000000369.10	protein kinase, AMP-activated, gamma 3b non-catalytic subunit	ZDB-GENE-060421-6938	CH211-67E16.1	ZDB-GENE-060421-6938	protein_coding	ensembl_havana_gene	ENSDART00000135209.2	ENSDART00000132747^ENSDART00000135209
ENSDARG00000000370		NNN	0.999874	0.999874	1	1		ENSDARG00000000370.10	trio Rho guanine nucleotide exchange factor b	ZDB-GENE-030616-399	—	—	protein_coding	ensembl	ENSDART00000000382.8	ENSDART00000000382
ENSDARG00000000380		NNN	0.751751	0.751751	0.94556	0.999825		ENSDARG00000000380.11	phosphodiesterase 6A, cGMP-specific, rod, alpha	ZDB-GENE-030616-42	pde6a	ZDB-GENE-030616-42	protein_coding	ensembl_havana_gene	ENSDART00000000392.10	ENSDART00000000392^ENSDART00000160752^ENSDART00000189157
ENSDARG00000000394		NNN	0.987129	0.987129	0.999895	0.99997		ENSDARG00000000394.10	matrin 3-like 1.1	ZDB-GENE-030616-40	matr3l	ZDB-GENE-030616-40	protein_coding	ensembl_havana_gene	ENSDART00000144168.3	ENSDART00000136630^ENSDART00000144168^ENSDART00000184244
ENSDARG00000000423		NNN	0.0683986	0.946289	0.0904946	0.0683986		ENSDARG00000000423.10	si:ch73-314g15.3	ZDB-GENE-030616-19	CH73-314G15.3	ZDB-GENE-030616-19	protein_coding	ensembl_havana_gene	ENSDART00000138914.2	ENSDART00000138914^ENSDART00000186670
ENSDARG00000000442		NBB	0.152497	0.152497	0.995551	0.994949		ENSDARG00000000442.11	solute carrier family 39 (zinc transporter), member 13	ZDB-GENE-030616-17	slc39a13	ZDB-GENE-030616-17	protein_coding	ensembl_havana_gene	ENSDART00000121972.4	ENSDART00000121972^ENSDART00000184425
ENSDARG00000000460		NGG	0.0960568	0.540291	0.0960568	0.25388		ENSDARG00000000460.9	novel immune-type receptor 2b	ZDB-GENE-001106-6	—	—	protein_coding	ensembl	ENSDART00000060383.5	ENSDART00000060383
ENSDARG00000000472		NNN	0.999972	0.999972	1	1		ENSDARG00000000472.9	contactin 2	ZDB-GENE-990630-12	cntn2	ZDB-GENE-990630-12	protein_coding	ensembl_havana_gene	ENSDART00000190721.1	ENSDART00000000486^ENSDART00000190721
ENSDARG00000000474		NNN	0.0505318	0.0505318	0.190042	0.60642		ENSDARG00000000474.9	troponin I type 1a (skeletal, slow)	ZDB-GENE-030616-266	tnni1	ZDB-GENE-030616-266	protein_coding	ensembl_havana_gene	ENSDART00000000488.7	ENSDART00000000488
ENSDARG00000000476		NNN	0.0369337	0.95871	0.062795	0.0369337		ENSDARG00000000476.13	PMS1 homolog 1, mismatch repair system component	ZDB-GENE-030616-528	pms1	ZDB-GENE-030616-528	protein_coding	ensembl_havana_gene	ENSDART00000002053.11	ENSDART00000002053^ENSDART00000157398^ENSDART00000188260
ENSDARG00000000489		NNN	0.408068	0.993954	0.750459	0.408068		ENSDARG00000000489.10	UPF3B, regulator of nonsense mediated mRNA decay	ZDB-GENE-040426-1630	upf3b	ZDB-GENE-040426-1630	protein_coding	ensembl_havana_gene	ENSDART00000010019.7	ENSDART00000010019^ENSDART00000133248
ENSDARG00000000503		NNN	0.999997	0.999997	1	1		ENSDARG00000000503.15	syntaxin 1B	ZDB-GENE-000330-4	stx1b	ZDB-GENE-000330-4	protein_coding	ensembl_havana_gene	ENSDART00000081951.7	ENSDART00000081951^ENSDART00000174611
ENSDARG00000000516		NNN	0.244717	0.565997	0.518649	0.244717		ENSDARG00000000516.12	ankyrin and armadillo repeat containing	ZDB-GENE-030616-533	ankar	DKEY-204G5.4;ZDB-GENE-030616-533	protein_coding	ensembl_havana_gene	ENSDART00000100342.5	ENSDART00000100342^ENSDART00000193879
ENSDARG00000000529		NNN	0.452239	0.772715	0.460093	0.452239		ENSDARG00000000529.13	oral-facial-digital syndrome 1	ZDB-GENE-030131-5427	—	—	protein_coding	ensembl	ENSDART00000000552.12	ENSDART00000000552
ENSDARG00000000540		NNN	0.9739	0.999159	0.9739	0.995995		ENSDARG00000000540.11	asparagine synthetase domain containing 1	ZDB-GENE-030616-362	asnsd1	ZDB-GENE-030616-362	protein_coding	ensembl_havana_gene	ENSDART00000131681.3	ENSDART00000000564^ENSDART00000131681^ENSDART00000166785^ENSDART00000180078^ENSDART00000182552^ENSDART00000187769
ENSDARG00000000542		NNN	0.961207	0.969572	0.961207	0.994032		ENSDARG00000000542.11	general transcription factor IIE, polypeptide 1, alpha	ZDB-GENE-041210-221	DKEY-96K16.1	—	protein_coding	ensembl_havana_gene	ENSDART00000000566.10	ENSDART00000000566^ENSDART00000138386^ENSDART00000146860^ENSDART00000148195^ENSDART00000161068
ENSDARG00000000551		NNN	0.110824	0.110824	0.957087	0.999999		ENSDARG00000000551.12	solute carrier family 1 (glutamate/neutral amino acid transporter), member 4	ZDB-GENE-030616-566	CH211-101N13.5	—	protein_coding	ensembl_havana_gene	ENSDART00000043004.7	ENSDART00000043004^ENSDART00000057584
ENSDARG00000000563		NNN	0.277121	0.971084	0.277121	0.691067		ENSDARG00000000563.14	titin, tandem duplicate 1	ZDB-GENE-030616-413	ttnl	CH211-198B21.1;ZDB-GENE-030616-413	protein_coding	ensembl_havana_gene	ENSDART00000125953.4	ENSDART00000125953^ENSDART00000191396^ENSDART00000193688
ENSDARG00000000567		NNN	0.998368	0.998368	1	1		ENSDARG00000000567.10	zinc finger protein 281a	ZDB-GENE-131126-34	CH211-197I23.1	—	protein_coding	ensembl_havana_gene	ENSDART00000155518.2	ENSDART00000155518^ENSDART00000193045
ENSDARG00000000568		NNN	0.391684	0.931941	0.391684	0.550207		ENSDARG00000000568.9	elongation factor RNA polymerase II	ZDB-GENE-030131-3946	CH211-202N20.3	ZDB-GENE-030131-3946	protein_coding	ensembl_havana_gene	ENSDART00000185845.1	ENSDART00000032770^ENSDART00000100642^ENSDART00000179672^ENSDART00000185845
ENSDARG00000000588		NPG	0.259817	0.926485	0.985767	0.259817		ENSDARG00000000588.9	GRP1 (general receptor for phosphoinositides 1)-associated scaffold protein	ZDB-GENE-060312-30	graspl	ZDB-GENE-060312-30	protein_coding	ensembl_havana_gene	ENSDART00000103343.3	ENSDART00000103343
ENSDARG00000000606		NNN	0.28517	0.974062	0.856897	0.28517		ENSDARG00000000606.12	dynein, axonemal, heavy chain 6	ZDB-GENE-030616-623	DKEY-285J13.1	—	protein_coding	ensembl_havana_gene	ENSDART00000054388.7	ENSDART00000054388^ENSDART00000137429^ENSDART00000141317
ENSDARG00000000631		SBB	0.990603	0.996737	0.990603	0.998725		ENSDARG00000000631.14	protein tyrosine phosphatase, non-receptor type 4a	ZDB-GENE-030616-449	ptpn4	ZDB-GENE-030616-449	protein_coding	ensembl_havana_gene	ENSDART00000000670.9	ENSDART00000000670^ENSDART00000078823^ENSDART00000151941^ENSDART00000183391^ENSDART00000188836
ENSDARG00000000638		NNN	0.103516	0.553899	0.180205	0.103516		ENSDARG00000000638.8	opsin 1 (cone pigments), medium-wave-sensitive, 4	ZDB-GENE-990604-43	opn1mw4	—	protein_coding	ensembl_havana_gene	ENSDART00000000678.7	ENSDART00000000678
ENSDARG00000000651		NGN	0.04425	0.734308	0.04425	0.120804		ENSDARG00000000651.9	O-sialoglycoprotein endopeptidase-like 1	ZDB-GENE-030616-532	osgepl1	ZDB-GENE-030616-532	protein_coding	ensembl_havana_gene	ENSDART00000000693.9	ENSDART00000000693
ENSDARG00000000656		NNN	0.258803	0.809913	0.370301	0.258803		ENSDARG00000000656.10	proteasome subunit beta 9a	ZDB-GENE-990415-140	psmb9a	ZDB-GENE-990415-140	protein_coding	ensembl_havana_gene	ENSDART00000000698.9	ENSDART00000000698
ENSDARG00000000666		NGG	0.231074	0.999986	0.902707	0.231074		ENSDARG00000000666.9	cellular repressor of E1A-stimulated genes 2	ZDB-GENE-041114-173	CH211-121J5.3	ZDB-GENE-041114-173	protein_coding	ensembl_havana_gene	ENSDART00000142726.2	ENSDART00000142726
ENSDARG00000000690		NGG	0.049668	0.340876	0.158348	0.049668		ENSDARG00000000690.10	synaptophysin-like 2b	ZDB-GENE-050417-309	RP71-15H20.3	ZDB-GENE-050417-309	protein_coding	ensembl_havana_gene	ENSDART00000000744.10	ENSDART00000000744
ENSDARG00000000729		NNN	0.98914	0.997187	0.98914	0.99969		ENSDARG00000000729.12	death-domain associated protein	ZDB-GENE-010110-3	daxx	ZDB-GENE-010110-3	protein_coding	ensembl_havana_gene	ENSDART00000123443.3	ENSDART00000122815^ENSDART00000123443^ENSDART00000124094
ENSDARG00000000730		NGG	0.0270198	0.185689	0.0270198	0.295031		ENSDARG00000000730.14	solute carrier family 6 member 22, tandem duplicate 1	ZDB-GENE-030616-629	scl6a13	ZDB-GENE-030616-629	protein_coding	ensembl_havana_gene	ENSDART00000132484.3	ENSDART00000001861^ENSDART00000128723^ENSDART00000132484^ENSDART00000151055
ENSDARG00000000747		NNN	0.661245	0.971606	0.911882	0.661245		ENSDARG00000000747.11	leucine carboxyl methyltransferase 2	ZDB-GENE-110714-2	RP71-45G20.14	—	protein_coding	ensembl_havana_gene	ENSDART00000112415.4	ENSDART00000112415^ENSDART00000144481
ENSDARG00000000760		NNN	0.435559	0.967129	0.608653	0.435559		ENSDARG00000000760.11	zinc finger protein 511	ZDB-GENE-030616-621	CH211-217G15.6	—	protein_coding	ensembl_havana_gene	ENSDART00000000831.9	ENSDART00000000831
ENSDARG00000000767		NNN	0.998778	0.999928	0.99942	0.998778		ENSDARG00000000767.12	Spi-1 proto-oncogene b	ZDB-GENE-980526-164	spi1b	ZDB-GENE-980526-164	protein_coding	ensembl_havana_gene	ENSDART00000036729.7	ENSDART00000036729^ENSDART00000093279^ENSDART00000126831^ENSDART00000173776
ENSDARG00000000779		NNN	0.0559781	0.476493	0.0559781	0.517543		ENSDARG00000000779.14	sec1 family domain containing 1	ZDB-GENE-030116-3	sly1	ZDB-GENE-030116-3	protein_coding	ensembl_havana_gene	ENSDART00000134735.4	ENSDART00000134735
ENSDARG00000000796		SGG	0.676912	0.998982	0.710149	0.676912		ENSDARG00000000796.12	nuclear receptor subfamily 4, group A, member 1	ZDB-GENE-040704-11	nr4a1	ZDB-GENE-040704-11	protein_coding	ensembl_havana_gene	ENSDART00000000876.11	ENSDART00000000876^ENSDART00000155905^ENSDART00000157479^ENSDART00000166682^ENSDART00000184206
ENSDARG00000000804		SGG	0.588296	0.999999	0.588296	0.615809		ENSDARG00000000804.9	Ras association (RalGDS/AF-6) domain family 6	ZDB-GENE-030616-513	DKEYP-84G6.4	ZDB-GENE-060818-10	protein_coding	ensembl_havana_gene	ENSDART00000000887.9	ENSDART00000000887^ENSDART00000136932
ENSDARG00000000830		NNN	0.997518	0.997518	0.99971	0.99909		ENSDARG00000000830.9	TEL2, telomere maintenance 2, homolog (S. cerevisiae)	ZDB-GENE-061103-523	telo2	ZDB-GENE-061103-523	protein_coding	ensembl_havana_gene	ENSDART00000131975.3	ENSDART00000131975^ENSDART00000187591
ENSDARG00000000837		NNG	0.695129	1	0.695129	0.713221		ENSDARG00000000837.11	sorting nexin 9a	ZDB-GENE-030616-66	snx9	RP71-36D5.4	protein_coding	ensembl_havana_gene	ENSDART00000104476.3	ENSDART00000098593^ENSDART00000104476^ENSDART00000142672
ENSDARG00000000853		NNN	0.75881	0.75881	0.942448	0.961213		ENSDARG00000000853.13	dual serine/threonine and tyrosine protein kinase	ZDB-GENE-040826-2	ripk5	ZDB-GENE-040826-2	protein_coding	ensembl_havana_gene	ENSDART00000067637.7	ENSDART00000067637^ENSDART00000106645
ENSDARG00000000857		NGG	0.681544	0.850108	0.681544	0.881097		ENSDARG00000000857.9	mitogen-activated protein kinase 14a	ZDB-GENE-010202-2	mapk14a	ZDB-GENE-010202-2	protein_coding	ensembl_havana_gene	ENSDART00000040362.5	ENSDART00000040362^ENSDART00000135437^ENSDART00000187430
ENSDARG00000000861		NNN	0.175613	0.937173	0.624631	0.175613		ENSDARG00000000861.13	scribbled planar cell polarity protein	ZDB-GENE-030616-572	scrib	ZDB-GENE-030616-572	protein_coding	ensembl_havana_gene	ENSDART00000074212.4	ENSDART00000074212^ENSDART00000164200^ENSDART00000173474^ENSDART00000173655^ENSDART00000173688^ENSDART00000173740^ENSDART00000173814^ENSDART00000173878^ENSDART00000174204^ENSDART00000174212
ENSDARG00000000887		NNN	0.307783	0.993087	0.559943	0.307783		ENSDARG00000000887.8	zgc:56699	ZDB-GENE-040426-2099	DKEY-197C14.4	ZDB-GENE-040426-2099	protein_coding	ensembl_havana_gene	ENSDART00000138849.2	ENSDART00000000992^ENSDART00000138156^ENSDART00000138849
ENSDARG00000000906		SGG	0.484406	0.997429	0.574416	0.484406		ENSDARG00000000906.11	src kinase associated phosphoprotein 2	ZDB-GENE-030616-438	skap2	DKEY-45E15.2;ZDB-GENE-030616-438	protein_coding	ensembl_havana_gene	ENSDART00000052660.7	ENSDART00000052660^ENSDART00000137344
ENSDARG00000000935		NNN	0.983023	0.983023	0.999322	0.998011		ENSDARG00000000935.12	unkempt family zinc finger	ZDB-GENE-040426-707	zc3h5	ZDB-GENE-040426-707	protein_coding	ensembl_havana_gene	ENSDART00000131300.2	ENSDART00000131300^ENSDART00000137254^ENSDART00000190278
ENSDARG00000000943		NNN	0.261068	0.685451	0.735593	0.261068		ENSDARG00000000943.12	DAZ interacting zinc finger protein 1	ZDB-GENE-040526-1	dzip1	—	protein_coding	ensembl_havana_gene	ENSDART00000125912.3	ENSDART00000049695^ENSDART00000083424^ENSDART00000125912^ENSDART00000136088^ENSDART00000177226
ENSDARG00000000966		NNN	0.650977	0.895199	0.650977	0.677425		ENSDARG00000000966.10	nuclear receptor corepressor 2	ZDB-GENE-030616-81	RP71-71M17.2	—	protein_coding	ensembl_havana_gene	ENSDART00000051139.7	ENSDART00000001092^ENSDART00000051139^ENSDART00000133292^ENSDART00000140618
ENSDARG00000001014		SGG	0.0603616	0.999394	0.0603616	0.0884923		ENSDARG00000001014.14	myosin, heavy chain 9b, non-muscle	ZDB-GENE-030131-998	myh9b	ZDB-GENE-030131-998	protein_coding	ensembl_havana_gene	ENSDART00000092373.7	ENSDART00000092373^ENSDART00000137105^ENSDART00000182438
ENSDARG00000001015		NNN	0.992506	0.992506	0.999998	0.999882		ENSDARG00000001015.12	zinc finger protein 384 like	ZDB-GENE-030616-498	znf384l	ZDB-GENE-030616-498	protein_coding	ensembl_havana_gene	ENSDART00000167640.2	ENSDART00000104891^ENSDART00000141913^ENSDART00000145741^ENSDART00000150957^ENSDART00000167640
ENSDARG00000001057		NNN	0.153232	0.999973	0.153232	0.201072		ENSDARG00000001057.9	bystin-like	ZDB-GENE-040426-1287	RP71-11B17.5	ZDB-GENE-040426-1287	protein_coding	ensembl_havana_gene	ENSDART00000001201.8	ENSDART00000001201
ENSDARG00000001127		NNN	0.999866	0.999866	1	1		ENSDARG00000001127.10	solute carrier family 17 (vesicular glutamate transporter), member 6a	ZDB-GENE-050105-4	slc17a6a	ZDB-GENE-050105-4	protein_coding	ensembl_havana_gene	ENSDART00000003494.7	ENSDART00000003494
ENSDARG00000001129		NNN	0.897028	0.897028	0.976415	0.945314		ENSDARG00000001129.12	dicer 1, ribonuclease type III	ZDB-GENE-030131-3445	dicer1	—	protein_coding	ensembl_havana_gene	ENSDART00000045881.7	ENSDART00000045881^ENSDART00000170429
ENSDARG00000001154		NNN	0.319968	0.319968	0.686346	0.980577		ENSDARG00000001154.10	RIMS binding protein 2	ZDB-GENE-040724-96	CH211-255F14.1	—	protein_coding	ensembl_havana_gene	ENSDART00000186879.1	ENSDART00000001313^ENSDART00000136269^ENSDART00000185935^ENSDART00000186449^ENSDART00000186879^ENSDART00000188902^ENSDART00000188965
ENSDARG00000001162		NNN	0.998162	0.998162	0.999922	1		ENSDARG00000001162.11	matrin 3-like 1.1	ZDB-GENE-030616-40	RP71-1D10.2	—	protein_coding	ensembl_havana_gene	ENSDART00000135004.3	ENSDART00000135004^ENSDART00000172802^ENSDART00000173345
ENSDARG00000001169		NGN	0.082539	0.253482	0.0944468	0.082539		ENSDARG00000001169.12	hydroxysteroid (17-beta) dehydrogenase 8	ZDB-GENE-010110-1	hsd17b8	ZDB-GENE-010110-1	protein_coding	ensembl_havana_gene	ENSDART00000001331.10	ENSDART00000001331^ENSDART00000123934^ENSDART00000151220
ENSDARG00000001210		NNN	0.938428	0.942533	0.954961	0.938428		ENSDARG00000001210.7	ADP-ribosylation factor-like 14 effector protein	ZDB-GENE-060825-216	arl14ep	ZDB-GENE-060825-216	protein_coding	ensembl_havana_gene	ENSDART00000001376.7	ENSDART00000001376
ENSDARG00000001220		NNN	0.268912	0.268912	0.88477	0.714487		ENSDARG00000001220.13	MYC binding protein 2	ZDB-GENE-030616-132	mycbp2	ZDB-GENE-030616-132	protein_coding	ensembl_havana_gene	ENSDART00000039157.8	ENSDART00000039157
ENSDARG00000001234		SBB	0.988676	0.988676	0.999998	0.999781		ENSDARG00000001234.12	mitogen-activated protein kinase kinase kinase kinase 2	ZDB-GENE-030616-163	map4k2	ZDB-GENE-060421-4541	protein_coding	ensembl_havana_gene	ENSDART00000009367.10	ENSDART00000009367^ENSDART00000173759
ENSDARG00000001241		NNN	0.996329	0.996329	0.998283	0.998917		ENSDARG00000001241.13	poly-U binding splicing factor b	ZDB-GENE-040625-116	puf60b	ZDB-GENE-040625-116	protein_coding	ensembl_havana_gene	ENSDART00000185388.1	ENSDART00000038487^ENSDART00000052274^ENSDART00000143285^ENSDART00000166448^ENSDART00000173463^ENSDART00000173827^ENSDART00000173852^ENSDART00000174003^ENSDART00000185388
ENSDARG00000001244		NNN	0.725682	0.895593	0.725682	0.98505		ENSDARG00000001244.12	serine/arginine repetitive matrix 1	ZDB-GENE-040426-2789	srrm1	ZDB-GENE-040426-2789	protein_coding	ensembl_havana_gene	ENSDART00000149241.3	ENSDART00000121848^ENSDART00000148483^ENSDART00000148856^ENSDART00000149241^ENSDART00000149557^ENSDART00000149747^ENSDART00000149790^ENSDART00000150195
ENSDARG00000001249		NNN	0.961446	0.961446	0.998719	0.99672		ENSDARG00000001249.10	polycomb group ring finger 1	ZDB-GENE-030616-605	CH211-207O21.2	—	protein_coding	ensembl_havana_gene	ENSDART00000001424.8	ENSDART00000001424^ENSDART00000168074
ENSDARG00000001259		NNN	0.0747444	0.0747444	0.759407	0.831902		ENSDARG00000001259.11	growth arrest-specific 2a	ZDB-GENE-091013-1	—	—	protein_coding	ensembl	ENSDART00000034313.8	ENSDART00000034313^ENSDART00000187659
ENSDARG00000001303		NNN	0.851975	0.878981	0.950177	0.851975		ENSDARG00000001303.12	proteasome subunit beta 8A	ZDB-GENE-990415-141	psmb8	ZDB-GENE-990415-141	protein_coding	ensembl_havana_gene	ENSDART00000104838.5	ENSDART00000104838^ENSDART00000147177
ENSDARG00000001313		NNB	0.903557	0.988422	0.903557	0.987758		ENSDARG00000001313.9	G2/M-phase specific E3 ubiquitin protein ligase	ZDB-GENE-030616-400	DKEY-18B8.4	ZDB-GENE-030616-400	protein_coding	ensembl_havana_gene	ENSDART00000001444.8	ENSDART00000001444^ENSDART00000132811
ENSDARG00000001354		SNN	0.739298	0.999979	0.739298	0.976186		ENSDARG00000001354.11	solute carrier family 6 member 22, tandem duplicate 2	ZDB-GENE-030616-628	scl6a13l	ZDB-GENE-030616-628	protein_coding	ensembl_havana_gene	ENSDART00000143577.3	ENSDART00000143577^ENSDART00000191395
ENSDARG00000001414		SPP	1	1	1	1		ENSDARG00000001414.8	multiple C2 domains, transmembrane 2a	ZDB-GENE-040724-63	CH211-214D15.1	—	protein_coding	ensembl_havana_gene	ENSDART00000001102.7	ENSDART00000001102^ENSDART00000136489^ENSDART00000189030^ENSDART00000193765
ENSDARG00000001431		NNN	0.433743	0.996189	0.433743	0.844868		ENSDARG00000001431.11	actinin alpha 3b	ZDB-GENE-030131-2040	actn3b	ZDB-GENE-030131-2040	protein_coding	ensembl_havana_gene	ENSDART00000001649.10	ENSDART00000001649^ENSDART00000122185^ENSDART00000189886
ENSDARG00000001437		NNN	0.999616	0.999616	0.999995	0.999997		ENSDARG00000001437.11	solute carrier family 2 (facilitated glucose transporter), member 1a	ZDB-GENE-030131-3158	slc2a1	ZDB-GENE-030131-3158	protein_coding	ensembl_havana_gene	ENSDART00000025414.7	ENSDART00000025414
ENSDARG00000001442		NNN	0.0919541	0.169244	0.187544	0.0919541		ENSDARG00000001442.10	inositol polyphosphate phosphatase-like 1b	ZDB-GENE-030616-75	inppl1b	ZDB-GENE-030616-75	protein_coding	ensembl_havana_gene	ENSDART00000172791.2	ENSDART00000105745^ENSDART00000172791
ENSDARG00000001447		NNN	0.989254	0.989254	0.99897	0.996177		ENSDARG00000001447.12	mesoderm induction early response 1b, transcriptional regulator	ZDB-GENE-070705-170	CH211-273K1.3	—	protein_coding	ensembl_havana_gene	ENSDART00000142545.3	ENSDART00000142545
ENSDARG00000001452		NNN	0.314282	0.989772	0.314282	0.505108		ENSDARG00000001452.7	ADAM metallopeptidase domain 8a	ZDB-GENE-030616-622	adam8	CH211-217G15.7;ZDB-GENE-030616-622	protein_coding	ensembl_havana_gene	ENSDART00000001678.7	ENSDART00000001678^ENSDART00000139572
ENSDARG00000001463		NNN	0.825093	0.825093	0.999986	1		ENSDARG00000001463.8	L-threonine dehydrogenase 2	ZDB-GENE-070620-14	CH73-93N8.2	ZDB-GENE-070620-14	protein_coding	ensembl_havana_gene	ENSDART00000001691.8	ENSDART00000001691^ENSDART00000158516^ENSDART00000162536
ENSDARG00000001470		NNN	0.851974	1	0.851974	1		ENSDARG00000001470.12	major histocompatibility complex class I ZEA	ZDB-GENE-070705-176	CH211-287J19.6	—	protein_coding	ensembl_havana_gene	ENSDART00000101143.5	ENSDART00000048445^ENSDART00000101143^ENSDART00000159925^ENSDART00000176803
ENSDARG00000001498		NNN	0.744321	0.876648	0.744321	0.997235		ENSDARG00000001498.10	src kinase associated phosphoprotein 1	ZDB-GENE-090721-1	DKEY-11C5.9	ZDB-GENE-090721-1	protein_coding	ensembl_havana_gene	ENSDART00000153030.3	ENSDART00000001737^ENSDART00000153030^ENSDART00000153189
ENSDARG00000001549		NNN	0.702818	0.856117	0.702818	0.8853		ENSDARG00000001549.13	sp3a transcription factor	ZDB-GENE-070410-111	CH211-258G4.1	ZDB-GENE-070410-111	protein_coding	ensembl_havana_gene	ENSDART00000001795.9	ENSDART00000001795^ENSDART00000123342^ENSDART00000177563
ENSDARG00000001557		NNN	0.0896396	0.998522	0.0896396	0.274537		ENSDARG00000001557.9	translocase of outer mitochondrial membrane 34	ZDB-GENE-030131-2081	tomm34	—	protein_coding	ensembl_havana_gene	ENSDART00000001803.8	ENSDART00000001803^ENSDART00000133554^ENSDART00000139105^ENSDART00000147754^ENSDART00000191243
ENSDARG00000001558		NNN	0.869916	0.996022	0.999864	0.869916		ENSDARG00000001558.13	kinesin family member C1	ZDB-GENE-000208-21	kifc1	ZDB-GENE-000208-21	protein_coding	ensembl_havana_gene	ENSDART00000160482.2	ENSDART00000158758^ENSDART00000160482^ENSDART00000193566
ENSDARG00000001559		NNN	0.998773	0.998773	1	1		ENSDARG00000001559.14	CUB and Sushi multiple domains 2	ZDB-GENE-030616-39	CH211-46O5.1	ZDB-GENE-060503-890	protein_coding	ensembl_havana_gene	ENSDART00000132471.4	ENSDART00000132471^ENSDART00000151348^ENSDART00000186003^ENSDART00000189743^ENSDART00000193856
ENSDARG00000001572		NNN	0.069545	0.542228	0.069545	0.650293		ENSDARG00000001572.11	perforin 1.3	ZDB-GENE-060503-461	DKEY-89B17.6	ZDB-GENE-060503-461	protein_coding	ensembl_havana_gene	ENSDART00000145003.5	ENSDART00000001821^ENSDART00000145003
ENSDARG00000001578		NGG	0.35325	0.997408	0.35325	0.887936		ENSDARG00000001578.7	enoyl CoA hydratase, short chain, 1, mitochondrial	ZDB-GENE-030616-617	CH211-217G15.1	—	protein_coding	ensembl_havana_gene	ENSDART00000001830.7	ENSDART00000001830
ENSDARG00000001621		NNN	0.954117	0.998078	0.954117	0.995774		ENSDARG00000001621.12	nuclear transcription factor Y, alpha, like	ZDB-GENE-040718-491	RP71-15H20.4	ZDB-GENE-040718-491	protein_coding	ensembl_havana_gene	ENSDART00000135973.3	ENSDART00000003493^ENSDART00000135973
ENSDARG00000001634		NNN	0.941611	0.941611	1	1		ENSDARG00000001634.13	kirre like nephrin family adhesion molecule 1a	ZDB-GENE-040426-2126	kirrela	ZDB-GENE-040426-2126	protein_coding	ensembl_havana_gene	ENSDART00000142924.3	ENSDART00000009695^ENSDART00000142924
ENSDARG00000001656		NNN	0.526368	0.988229	0.913872	0.526368		ENSDARG00000001656.10	proteasome subunit beta 13a	ZDB-GENE-001208-2	psmb10	ZDB-GENE-001208-2	protein_coding	ensembl_havana_gene	ENSDART00000001930.9	ENSDART00000001930^ENSDART00000134850
ENSDARG00000001676		NNN	0.999978	0.999978	1	1		ENSDARG00000001676.12	glycoprotein M6Bb	ZDB-GENE-030710-10	gpm6bb	ZDB-GENE-030710-10	protein_coding	ensembl_havana_gene	ENSDART00000085693.7	ENSDART00000085693^ENSDART00000137214
ENSDARG00000001686		SPP	0.999999	0.999999	0.999999	0.999999		ENSDARG00000001686.10	uridine-cytidine kinase 1-like 1a	ZDB-GENE-040724-238	CH211-215H12.5	—	protein_coding	ensembl_havana_gene	ENSDART00000030885.7	ENSDART00000030885
ENSDARG00000001710		NNN	0.399329	0.399329	1	1		ENSDARG00000001710.13	flotillin 1b	ZDB-GENE-020430-2	flot1a	ZDB-GENE-020430-1	protein_coding	ensembl_havana_gene	ENSDART00000178832.2	ENSDART00000139122^ENSDART00000178832
ENSDARG00000001712		NBN	0.0367229	0.45944	0.971405	0.0367229		ENSDARG00000001712.11	si:ch211-247n2.1	ZDB-GENE-141216-101	CH211-247N2.1	—	protein_coding	ensembl_havana_gene	ENSDART00000052698.7	ENSDART00000052698^ENSDART00000160570
ENSDARG00000001721		NNN	0.996346	1	0.996346	0.999857		ENSDARG00000001721.11	otoconin 90	ZDB-GENE-070912-300	CH211-66B9.2	—	protein_coding	ensembl_havana_gene	ENSDART00000098303.5	ENSDART00000098303^ENSDART00000139945^ENSDART00000144317
ENSDARG00000001729		NNN	0.2514	0.327023	0.2514	0.342041		ENSDARG00000001729.12	striatin, calmodulin binding protein 3	ZDB-GENE-030616-405	strn3	ZDB-GENE-030616-405	protein_coding	ensembl_havana_gene	ENSDART00000126967.3	ENSDART00000126967
ENSDARG00000001733		NNN	0.999503	0.999996	0.999503	1		ENSDARG00000001733.12	GULP, engulfment adaptor PTB domain containing 1a	ZDB-GENE-030616-21	CH211-198B21.4	ZDB-GENE-030616-21	protein_coding	ensembl_havana_gene	ENSDART00000138133.3	ENSDART00000002027^ENSDART00000138133^ENSDART00000191186^ENSDART00000192224
ENSDARG00000001734		NNN	0.109565	0.639386	0.109565	0.607111		ENSDARG00000001734.10	FK506 binding protein 8	ZDB-GENE-040426-1849	CH211-202N20.2	ZDB-GENE-040426-1849	protein_coding	ensembl_havana_gene	ENSDART00000002029.10	ENSDART00000002029
ENSDARG00000001754		NNN	0.546704	0.999996	0.567928	0.546704		ENSDARG00000001754.11	NOC2-like nucleolar associated transcriptional repressor	ZDB-GENE-000607-75	DKEY-98J1.1	ZDB-GENE-000607-75	protein_coding	ensembl_havana_gene	ENSDART00000091662.6	ENSDART00000091662^ENSDART00000122945^ENSDART00000141853
ENSDARG00000001760		NNN	0.793062	0.793062	0.989983	0.987503		ENSDARG00000001760.11	tenascin XBa	ZDB-GENE-070103-5	CH73-112P19.3	—	protein_coding	ensembl_havana_gene	ENSDART00000014439.10	ENSDART00000014439^ENSDART00000185748
ENSDARG00000001767		NNN	0.761743	0.849073	0.99993	0.761743		ENSDARG00000001767.10	solute carrier family 29 (equilibrative nucleoside transporter), member 2	ZDB-GENE-050220-15	DKEY-197A18.4	ZDB-GENE-050220-15	protein_coding	ensembl_havana_gene	ENSDART00000131646.2	ENSDART00000131646^ENSDART00000148161
ENSDARG00000001769		NNN	0.260607	0.368794	0.260607	0.261512		ENSDARG00000001769.11	protein tyrosine phosphatase, receptor type, A	ZDB-GENE-020107-1	ptpra	ZDB-GENE-020107-1	protein_coding	ensembl_havana_gene	ENSDART00000026903.11	ENSDART00000026903^ENSDART00000101956
ENSDARG00000001771		NGG	0.163745	0.163745	0.380545	0.46477		ENSDARG00000001771.7	otolin 1a	ZDB-GENE-050707-1	otol1	ZDB-GENE-050707-1	protein_coding	ensembl_havana_gene	ENSDART00000132859.3	ENSDART00000132859
ENSDARG00000001776		NNN	0.034013	0.127081	0.116762	0.034013		ENSDARG00000001776.8	stromal interaction molecule 2b	ZDB-GENE-120404-3	DKEY-20D17.2	—	protein_coding	ensembl_havana_gene	ENSDART00000012089.8	ENSDART00000012089
ENSDARG00000001777		NNN	0.787216	0.999683	0.810318	0.787216		ENSDARG00000001777.8	nucleoporin 155	ZDB-GENE-040426-711	nup155	ZDB-GENE-040426-711	protein_coding	ensembl_havana_gene	ENSDART00000010626.7	ENSDART00000010626^ENSDART00000137285
ENSDARG00000001781		NNN	0.554447	0.787219	0.986035	0.554447		ENSDARG00000001781.11	tetraspanin 11	ZDB-GENE-041210-93	tspan11	ZDB-GENE-041210-93	protein_coding	ensembl_havana_gene	ENSDART00000138661.3	ENSDART00000138661^ENSDART00000193598
ENSDARG00000001782		NNN	0.99549	0.999991	0.995994	0.99549		ENSDARG00000001782.11	protein kinase, cAMP-dependent, catalytic, beta a	ZDB-GENE-040426-1351	prkacba	ZDB-GENE-040426-1351	protein_coding	ensembl_havana_gene	ENSDART00000011183.9	ENSDART00000011183^ENSDART00000158112
ENSDARG00000001785		NNN	0.95427	0.95427	1	1		ENSDARG00000001785.7	iroquois homeobox 2a	ZDB-GENE-040426-1446	irx2a	ZDB-GENE-040426-1446	protein_coding	ensembl_havana_gene	ENSDART00000016303.6	ENSDART00000016303^ENSDART00000148452^ENSDART00000148602^ENSDART00000183394
ENSDARG00000001788		NNN	0.469323	0.82732	0.469323	0.506508		ENSDARG00000001788.9	ATP synthase peripheral stalk subunit OSCP	ZDB-GENE-050522-147	CH211-125E6.3	ZDB-GENE-050522-147	protein_coding	ensembl_havana_gene	ENSDART00000005879.8	ENSDART00000005879^ENSDART00000141849^ENSDART00000142453
ENSDARG00000001803		NNN	0.731536	0.996924	0.877425	0.731536		ENSDARG00000001803.12	potassium voltage-gated channel, subfamily H (eag-related), member 6a	ZDB-GENE-040702-5	kcnh2	—	protein_coding	ensembl_havana_gene	ENSDART00000090809.6	ENSDART00000090809^ENSDART00000134201
ENSDARG00000001804		NPP	0.0205819	0.0205819	0.999834	0.997161		ENSDARG00000001804.8	zgc:112148	ZDB-GENE-050417-235	CH73-194O9.1	ZDB-GENE-050417-235	protein_coding	ensembl_havana_gene	ENSDART00000014103.8	ENSDART00000014103^ENSDART00000183087^ENSDART00000183146^ENSDART00000189908
ENSDARG00000001807		NNN	0.484209	0.778278	0.484209	0.751953		ENSDARG00000001807.10	tumor necrosis factor receptor superfamily, member 21	ZDB-GENE-030131-5971	tnfrsf21	ZDB-GENE-030131-5971	protein_coding	ensembl_havana_gene	ENSDART00000037855.8	ENSDART00000037855
ENSDARG00000001817		NNN	0.365051	0.685079	0.365051	0.937636		ENSDARG00000001817.9	zmp:0000000521	ZDB-GENE-130530-524	—	—	protein_coding	ensembl	ENSDART00000016143.9	ENSDART00000016143
ENSDARG00000001818		NNN	0.843083	0.843083	0.974542	0.995677		ENSDARG00000001818.11	complement component c3b, tandem duplicate 2	ZDB-GENE-030131-3063	CH211-140F21.1	ZDB-GENE-030131-3063	protein_coding	ensembl_havana_gene	ENSDART00000108737.6	ENSDART00000108737
ENSDARG00000001825		NNN	0.0382053	0.999946	0.848672	0.0382053		ENSDARG00000001825.11	cilia and flagella associated protein 43	ZDB-GENE-080815-3	CH211-223P8.5	—	protein_coding	havana	ENSDART00000147713.2	ENSDART00000147713
ENSDARG00000001829		NNN	0.995631	0.995631	0.998071	0.999991		ENSDARG00000001829.11	zgc:112982	ZDB-GENE-050306-55	CH211-80N22.4	ZDB-GENE-050306-55	protein_coding	ensembl_havana_gene	ENSDART00000024606.9	ENSDART00000024606^ENSDART00000111096^ENSDART00000144664^ENSDART00000146736^ENSDART00000160578
ENSDARG00000001835		NNN	1	1	1	1		ENSDARG00000001835.12	sodium leak channel, non-selective	ZDB-GENE-050410-12	DKEY-250I3.2	ZDB-GENE-050410-12	protein_coding	ensembl_havana_gene	ENSDART00000048469.9	ENSDART00000048469^ENSDART00000135022^ENSDART00000142289^ENSDART00000145204^ENSDART00000186889
ENSDARG00000001857		NNN	0.284154	0.284154	0.326712	0.288676		ENSDARG00000001857.11	AF4/FMR2 family, member 4	ZDB-GENE-100910-5	aff4	ZDB-GENE-100910-5	protein_coding	ensembl_havana_gene	ENSDART00000151748.2	ENSDART00000151350^ENSDART00000151512^ENSDART00000151748
ENSDARG00000001859		NNN	0.993899	0.999549	0.993899	0.999967		ENSDARG00000001859.7	developing brain homeobox 1b	ZDB-GENE-000128-11	dbx1b	ZDB-GENE-000128-11	protein_coding	ensembl_havana_gene	ENSDART00000015681.6	ENSDART00000015681
ENSDARG00000001870		NNG	0.54854	0.982092	0.997792	0.54854		ENSDARG00000001870.10	ATPase Na+/K+ transporting subunit alpha 1a, tandem duplicate 4	ZDB-GENE-001212-4	atp1a1a.4	ZDB-GENE-001212-4	protein_coding	ensembl_havana_gene	ENSDART00000048828.5	ENSDART00000048828^ENSDART00000123205^ENSDART00000141426
ENSDARG00000001873		NBB	0.983233	0.983233	0.999998	0.998713		ENSDARG00000001873.7	phosphoglycerate dehydrogenase	ZDB-GENE-030131-647	DKEYP-13F6.2	ZDB-GENE-030131-647	protein_coding	ensembl_havana_gene	ENSDART00000012938.7	ENSDART00000012938
ENSDARG00000001879		SGG	0.634365	0.995461	0.634365	0.755001		ENSDARG00000001879.11	neuron navigator 2b	ZDB-GENE-061207-13	nav2	—	protein_coding	havana	ENSDART00000143666.4	ENSDART00000137935^ENSDART00000143666
ENSDARG00000001880		NNN	0.268748	0.846911	0.268748	0.999833		ENSDARG00000001880.12	syntaxin 3A	ZDB-GENE-040426-1489	stx3a	ZDB-GENE-040426-1489	protein_coding	ensembl_havana_gene	ENSDART00000073707.6	ENSDART00000073707^ENSDART00000161435^ENSDART00000169942^ENSDART00000183667
ENSDARG00000001881		NNN	0.818675	0.818675	0.999905	1		ENSDARG00000001881.11	calcium channel, voltage-dependent, beta 3a	ZDB-GENE-060221-2	cacnb3a	DKEY-279C17.1;ZDB-GENE-060221-2	protein_coding	ensembl_havana_gene	ENSDART00000087280.5	ENSDART00000087280^ENSDART00000143529
ENSDARG00000001882		NNN	0.399261	0.566334	0.399261	0.823725		ENSDARG00000001882.8	kelch repeat and BTB (POZ) domain containing 12	ZDB-GENE-050904-1	kbtbd12	ZDB-GENE-050904-1	protein_coding	ensembl_havana_gene	ENSDART00000035101.7	ENSDART00000035101^ENSDART00000188187
ENSDARG00000001888		NNN	0.778925	0.778925	0.797642	0.951272		ENSDARG00000001888.8	protein phosphatase, Mg2+/Mn2+ dependent, 1Ba	ZDB-GENE-991102-16	pp2cb	ZDB-GENE-991102-16	protein_coding	ensembl_havana_gene	ENSDART00000144755.3	ENSDART00000126725^ENSDART00000144755^ENSDART00000190925
ENSDARG00000001889		NNN	0.999947	0.999947	1	1		ENSDARG00000001889.8	tubulin, alpha 1a	ZDB-GENE-090507-4	tuba1l2	ZDB-GENE-090507-4	protein_coding	ensembl_havana_gene	ENSDART00000009277.8	ENSDART00000009277
ENSDARG00000001890		NNN	0.454006	0.69054	0.454006	0.54493		ENSDARG00000001890.11	STT3B, subunit of the oligosaccharyltransferase complex (catalytic)	ZDB-GENE-030131-2638	stt3b	ZDB-GENE-030131-2638	protein_coding	ensembl_havana_gene	ENSDART00000102525.5	ENSDART00000102525^ENSDART00000191330
ENSDARG00000001891		NNN	0.180403	0.180403	0.457394	0.239816		ENSDARG00000001891.12	synaptotagmin XIVb	ZDB-GENE-041014-36	nmbr	ZDB-GENE-041014-36	protein_coding	ensembl_havana_gene	ENSDART00000136079.3	ENSDART00000136079^ENSDART00000175069
ENSDARG00000001897		NNN	0.503223	0.704257	0.503223	0.507133		ENSDARG00000001897.12	mannosidase, alpha, class 2B, member 1	ZDB-GENE-050327-52	man2b1	ZDB-GENE-050327-52	protein_coding	ensembl_havana_gene	ENSDART00000004780.10	ENSDART00000004780^ENSDART00000141062
ENSDARG00000001898		SGN	0.0211371	0.992077	0.489639	0.0211371		ENSDARG00000001898.11	mannosidase, endo-alpha	ZDB-GENE-040912-87	manea	ZDB-GENE-040912-87	protein_coding	ensembl_havana_gene	ENSDART00000142972.2	ENSDART00000132571^ENSDART00000142972^ENSDART00000189936
ENSDARG00000001906		NNN	0.708185	0.708185	0.997009	0.996536		ENSDARG00000001906.11	si:dkey-247m21.3	ZDB-GENE-091204-249	DKEY-247M21.3	—	protein_coding	ensembl_havana_gene	ENSDART00000025860.10	ENSDART00000025860^ENSDART00000132853
ENSDARG00000001909		NNG	0.413098	0.999588	0.413098	0.433761		ENSDARG00000001909.10	villin-like	ZDB-GENE-081222-1	—	—	protein_coding	ensembl	ENSDART00000048940.7	ENSDART00000048940
ENSDARG00000001910		NNN	0.785076	0.999929	0.785076	0.999974		ENSDARG00000001910.13	RAR-related orphan receptor A, paralog b	ZDB-GENE-040426-855	rorab	ZDB-GENE-040426-855	protein_coding	ensembl_havana_gene	ENSDART00000019140.12	ENSDART00000019140^ENSDART00000173723
ENSDARG00000001912		NNN	0.271362	0.271362	0.997124	0.988295		ENSDARG00000001912.11	dopamine receptor D4 related sequence	ZDB-GENE-051113-172	drd4-rs	CH211-69H5.1;ZDB-GENE-051113-172	protein_coding	ensembl_havana_gene	ENSDART00000003420.8	ENSDART00000003420^ENSDART00000169248
ENSDARG00000001913		NNN	0.99809	0.99809	0.998487	1		ENSDARG00000001913.11	palmdelphin a	ZDB-GENE-070705-48	palmda	ZDB-GENE-070705-48	protein_coding	ensembl_havana_gene	ENSDART00000137848.4	ENSDART00000006817^ENSDART00000137848^ENSDART00000185940
ENSDARG00000001929		NNN	0.0747364	0.859721	0.0747364	0.182187		ENSDARG00000001929.9	PTEN induced putative kinase 1	ZDB-GENE-041212-53	—	—	protein_coding	ensembl	ENSDART00000006436.9	ENSDART00000006436
ENSDARG00000001930		NNN	0.991585	0.995281	0.999705	0.991585		ENSDARG00000001930.10	kelch-like family member 15	ZDB-GENE-040801-99	klhl15	ZDB-GENE-040801-99	protein_coding	ensembl_havana_gene	ENSDART00000005331.8	ENSDART00000005331^ENSDART00000128446^ENSDART00000180687^ENSDART00000183812
ENSDARG00000001933		SGG	0.367002	1	0.367002	0.666035		ENSDARG00000001933.12	protein kinase, AMP-activated, gamma 2 non-catalytic subunit b	ZDB-GENE-070912-442	prkag2	—	protein_coding	ensembl_havana_gene	ENSDART00000142649.4	ENSDART00000142649^ENSDART00000192832
ENSDARG00000001937		NNN	0.938499	0.999782	0.98875	0.938499		ENSDARG00000001937.9	—	—	—	—	protein_coding	ensembl	ENSDART00000019804.9	ENSDART00000019804
ENSDARG00000001939		NNN	0.97895	0.97895	0.999971	0.999999		ENSDARG00000001939.13	beta-1,3-glucuronyltransferase 3 (glucuronosyltransferase I)	ZDB-GENE-020419-3	b3gat3	ZDB-GENE-020419-3	protein_coding	ensembl_havana_gene	ENSDART00000149966.3	ENSDART00000149490^ENSDART00000149966^ENSDART00000175583
ENSDARG00000001940		NNN	0.431455	0.916965	0.431455	0.676423		ENSDARG00000001940.11	DnaJ (Hsp40) homolog, subfamily C, member 1	ZDB-GENE-061103-529	dnajc1	ZDB-GENE-061103-529	protein_coding	ensembl_havana_gene	ENSDART00000079518.5	ENSDART00000079518^ENSDART00000123008^ENSDART00000123539^ENSDART00000147726
ENSDARG00000001950		NNG	0.0261887	0.999637	0.0261887	0.0803728		ENSDARG00000001950.8	adenylate kinase 1	ZDB-GENE-040822-37	—	—	protein_coding	ensembl	ENSDART00000013404.8	ENSDART00000013404^ENSDART00000187767
ENSDARG00000001953		NGG	0.111721	0.656988	0.111721	0.565739		ENSDARG00000001953.13	6-phosphofructo-2-kinase/fructose-2,6-biphosphatase 3	ZDB-GENE-040426-2724	pfkfb3	CH211-284L9.1;ZDB-GENE-040426-2724	protein_coding	ensembl_havana_gene	ENSDART00000041402.9	ENSDART00000041402^ENSDART00000133237^ENSDART00000133991^ENSDART00000136720^ENSDART00000159941
ENSDARG00000001968		SGG	0.0412507	0.999891	0.0412507	0.0727266		ENSDARG00000001968.13	dedicator of cytokinesis 5	ZDB-GENE-080108-4	dock5	CH211-167E20.1;ZDB-GENE-080108-4	protein_coding	ensembl_havana_gene	ENSDART00000135834.3	ENSDART00000135834
ENSDARG00000001969		NNN	0.992629	0.99943	0.994227	0.992629		ENSDARG00000001969.10	taxilin gamma	ZDB-GENE-060616-122	txlng	ZDB-GENE-060616-122	protein_coding	ensembl_havana_gene	ENSDART00000104143.5	ENSDART00000103449^ENSDART00000104143^ENSDART00000191178
ENSDARG00000001971		NNN	0.897464	0.897464	0.980962	0.999955		ENSDARG00000001971.9	collagen triple helix repeat containing 1b	ZDB-GENE-050420-46	CH211-236P22.2	—	protein_coding	ensembl_havana_gene	ENSDART00000147072.3	ENSDART00000147072^ENSDART00000181240^ENSDART00000190202^ENSDART00000190549
ENSDARG00000001975		NNN	0.530222	0.877125	0.68906	0.530222		ENSDARG00000001975.10	hydroxysteroid (11-beta) dehydrogenase 2	ZDB-GENE-030131-6030	hsd11b2	ZDB-GENE-030131-6030	protein_coding	ensembl_havana_gene	ENSDART00000141211.2	ENSDART00000141211
ENSDARG00000001976		NNN	0.245825	0.245825	0.427708	0.986105		ENSDARG00000001976.9	FK506 binding protein 16	ZDB-GENE-050208-116	CH211-13K12.1	ZDB-GENE-050208-116	protein_coding	ensembl_havana_gene	ENSDART00000007856.8	ENSDART00000007856
ENSDARG00000001993		SNN	0.354287	0.999589	0.354287	0.999743		ENSDARG00000001993.9	myosin, heavy chain b	ZDB-GENE-081124-1	CH211-157B11.9	ZDB-GENE-081124-1	protein_coding	ensembl_havana_gene	ENSDART00000026257.8	ENSDART00000026257^ENSDART00000156295
ENSDARG00000001994		NNN	0.985695	0.985695	1	1		ENSDARG00000001994.9	syntaxin binding protein 1a	ZDB-GENE-050626-106	CH211-86K6.1	ZDB-GENE-050626-106	protein_coding	ensembl_havana_gene	ENSDART00000015629.9	ENSDART00000015629^ENSDART00000148199^ENSDART00000171306
ENSDARG00000001999		NBB	0.409633	0.409633	0.999248	0.994096		ENSDARG00000001999.12	ADAM metallopeptidase with thrombospondin type 1 motif, 18	ZDB-GENE-070815-1	adamts18	ZDB-GENE-070815-1	protein_coding	ensembl_havana_gene	ENSDART00000004120.11	ENSDART00000004120^ENSDART00000190350
ENSDARG00000002002		SGG	0.351039	0.999922	0.780846	0.351039		ENSDARG00000002002.11	LIM and cysteine-rich domains 1	ZDB-GENE-040426-1067	CH1073-91K2.1	ZDB-GENE-040426-1067	protein_coding	ensembl_havana_gene	ENSDART00000157127.3	ENSDART00000153841^ENSDART00000157127
ENSDARG00000002006		NNN	0.962247	0.994885	0.962247	0.996385		ENSDARG00000002006.10	retinoid x receptor, beta b	ZDB-GENE-990415-242	rxrbb	ZDB-GENE-990415-242	protein_coding	ensembl_havana_gene	ENSDART00000021596.9	ENSDART00000021596^ENSDART00000147844^ENSDART00000180168
ENSDARG00000002013		NGG	0.216226	0.216226	0.435041	0.39885		ENSDARG00000002013.11	growth factor receptor-bound protein 10a	ZDB-GENE-040822-32	grb10	DKEY-158E13.1;ZDB-GENE-040822-32	protein_coding	ensembl_havana_gene	ENSDART00000140665.3	ENSDART00000042172^ENSDART00000140665
ENSDARG00000002016		NNN	0.0859714	0.979748	0.15486	0.0859714		ENSDARG00000002016.10	peptidylprolyl isomerase (cyclophilin)-like 2	ZDB-GENE-040426-1096	DKEYP-86G2.1	ppil2;ZDB-GENE-040426-1096	protein_coding	ensembl_havana_gene	ENSDART00000051663.7	ENSDART00000051663
ENSDARG00000002020		NNN	0.465068	0.465068	0.999995	1		ENSDARG00000002020.13	RPTOR independent companion of MTOR, complex 2b	ZDB-GENE-070810-5	DKEY-120E24.2	—	protein_coding	ensembl_havana_gene	ENSDART00000142961.2	ENSDART00000058311^ENSDART00000142961^ENSDART00000181746^ENSDART00000184832
ENSDARG00000002021		NGG	0.127478	0.608214	0.298598	0.127478		ENSDARG00000002021.10	phosphorylase, glycogen; brain	ZDB-GENE-040928-2	pygb	—	protein_coding	ensembl_havana_gene	ENSDART00000022830.9	ENSDART00000022830
ENSDARG00000002026		NNN	0.96385	0.96385	0.997581	0.999995		ENSDARG00000002026.10	QKI, KH domain containing, RNA binding b	ZDB-GENE-081028-54	CH73-47D4.1	—	protein_coding	ensembl_havana_gene	ENSDART00000183554.1	ENSDART00000018737^ENSDART00000131553^ENSDART00000136913^ENSDART00000139958^ENSDART00000183554^ENSDART00000189841
ENSDARG00000002031		NNN	0.997713	0.997713	0.999996	1		ENSDARG00000002031.9	TOX high mobility group box family member 4 a	ZDB-GENE-070912-576	—	—	protein_coding	ensembl	ENSDART00000056544.7	ENSDART00000056544
ENSDARG00000002037		NNN	0.770127	0.989221	0.770127	0.997521		ENSDARG00000002037.11	6-phosphofructo-2-kinase/fructose-2,6-biphosphatase 2b	ZDB-GENE-120222-1	DKEY-219E24.3	—	protein_coding	ensembl_havana_gene	ENSDART00000156276.3	ENSDART00000156276^ENSDART00000156431^ENSDART00000180504^ENSDART00000185438^ENSDART00000189116
ENSDARG00000002060		NNN	0.865767	0.972108	0.865767	0.918298		ENSDARG00000002060.11	BRF2, RNA polymerase III transcription initiation factor	ZDB-GENE-040801-43	brf2	ZDB-GENE-040801-43	protein_coding	ensembl_havana_gene	ENSDART00000160174.3	ENSDART00000020297^ENSDART00000141190^ENSDART00000160174^ENSDART00000169493^ENSDART00000183850
ENSDARG00000002071		SBG	0.0404012	0.993909	0.985486	0.0404012		ENSDARG00000002071.7	adenylosuccinate synthase	ZDB-GENE-050417-337	adss	ZDB-GENE-050417-337	protein_coding	ensembl_havana_gene	ENSDART00000018155.7	ENSDART00000018155
ENSDARG00000002077		NNN	0.153258	0.642384	0.153258	0.523666		ENSDARG00000002077.8	MNAT CDK-activating kinase assembly factor 1	ZDB-GENE-041010-203	CH211-202M24.4	ZDB-GENE-041010-203	protein_coding	ensembl_havana_gene	ENSDART00000006648.8	ENSDART00000006648
ENSDARG00000002082		NNN	0.739774	0.939828	0.739774	0.935233		ENSDARG00000002082.10	casein kinase 2, alpha 1 polypeptide	ZDB-GENE-990415-27	ck2a1	ZDB-GENE-990415-27	protein_coding	ensembl_havana_gene	ENSDART00000008297.10	ENSDART00000008297^ENSDART00000056551^ENSDART00000140880^ENSDART00000146886^ENSDART00000147373^ENSDART00000192354
ENSDARG00000002084		NNN	0.791262	0.999808	0.893845	0.791262		ENSDARG00000002084.11	laminin, beta 2 (laminin S)	ZDB-GENE-081030-4	DKEY-32E6.2	ZDB-GENE-081030-4	protein_coding	ensembl_havana_gene	ENSDART00000147326.2	ENSDART00000147326
ENSDARG00000002097		NPP	0.533088	0.533088	0.999319	1		ENSDARG00000002097.11	si:dkeyp-52c3.7	ZDB-GENE-110411-213	—	—	protein_coding	ensembl	ENSDART00000149308.2	ENSDART00000149308
ENSDARG00000002127		NNN	0.987739	0.987739	0.998567	0.997144		ENSDARG00000002127.11	signal transducing adaptor molecule (SH3 domain and ITAM motif) 1	ZDB-GENE-031118-123	stam	—	protein_coding	ensembl_havana_gene	ENSDART00000141170.3	ENSDART00000141170^ENSDART00000142727
ENSDARG00000002128		NNN	0.943001	0.998085	0.943001	0.985829		ENSDARG00000002128.9	CWF19-like 1, cell cycle control	ZDB-GENE-031204-5	CH211-234F20.6	—	protein_coding	ensembl_havana_gene	ENSDART00000026509.9	ENSDART00000026509
ENSDARG00000002131		NNN	0.916277	0.916277	0.999906	0.999848		ENSDARG00000002131.10	cugbp, Elav-like family member 2	ZDB-GENE-030826-35	cugbp2	ZDB-GENE-030826-35	protein_coding	ensembl_havana_gene	ENSDART00000132615.3	ENSDART00000017443^ENSDART00000077926^ENSDART00000128368^ENSDART00000132615^ENSDART00000133433^ENSDART00000135942^ENSDART00000138873^ENSDART00000139439
ENSDARG00000002165		NPP	0.97569	0.97569	0.98452	0.99999		ENSDARG00000002165.7	proteasome activator subunit 1	ZDB-GENE-991110-17	DKEYP-28D2.5	ZDB-GENE-991110-17	protein_coding	ensembl_havana_gene	ENSDART00000005105.7	ENSDART00000005105^ENSDART00000133925
ENSDARG00000002167		NNN	0.935906	0.935906	0.999854	0.999999		ENSDARG00000002167.10	calcium channel, voltage-dependent, beta 1 subunit	ZDB-GENE-040718-399	cacnb1	—	protein_coding	ensembl_havana_gene	ENSDART00000057159.8	ENSDART00000012835^ENSDART00000057159^ENSDART00000111707^ENSDART00000127275^ENSDART00000130611
ENSDARG00000002168		NNN	0.997798	0.997798	0.999823	0.999995		ENSDARG00000002168.8	transformer 2 beta homolog	ZDB-GENE-040426-1094	sfrs10	ZDB-GENE-040426-1094	protein_coding	ensembl_havana_gene	ENSDART00000021266.7	ENSDART00000021266^ENSDART00000132331^ENSDART00000142024^ENSDART00000146059^ENSDART00000146127^ENSDART00000184900
ENSDARG00000002172		SBB	0.998573	0.998573	1	0.999677		ENSDARG00000002172.10	apelin receptor a	ZDB-GENE-060929-512	agtrl1a	ZDB-GENE-060929-512	protein_coding	ensembl_havana_gene	ENSDART00000074125.6	ENSDART00000074125
ENSDARG00000002174		NNN	0.777736	0.998926	0.981341	0.777736		ENSDARG00000002174.6	integrin alpha FG-GAP repeat containing 2	ZDB-GENE-041008-161	DKEY-245F7.2	ZDB-GENE-050417-468	protein_coding	ensembl_havana_gene	ENSDART00000013313.6	ENSDART00000013313
ENSDARG00000002184		NNN	0.971258	0.971258	0.982478	0.999761		ENSDARG00000002184.8	immunoglobulin (CD79A) binding protein 1	ZDB-GENE-040426-2928	CH73-223D24.2	ZDB-GENE-040426-2928	protein_coding	ensembl_havana_gene	ENSDART00000006899.8	ENSDART00000006899^ENSDART00000146814
ENSDARG00000002190		SPP	0.995075	1	0.999812	0.995075		ENSDARG00000002190.10	charged multivesicular body protein 2Bb	ZDB-GENE-040426-2539	DKEYP-8H3.2	ZDB-GENE-040426-2539	protein_coding	ensembl_havana_gene	ENSDART00000018472.8	ENSDART00000018472
ENSDARG00000002192		NNN	0.993126	0.993126	0.999985	0.99996		ENSDARG00000002192.11	asporin (LRR class 1)	ZDB-GENE-041105-7	aspn	ZDB-GENE-010131-5	protein_coding	ensembl_havana_gene	ENSDART00000064798.6	ENSDART00000064798^ENSDART00000143164^ENSDART00000184366
ENSDARG00000002193		NNN	0.748091	0.748091	0.857533	0.999999		ENSDARG00000002193.10	rhodopsin	ZDB-GENE-990415-271	—	—	protein_coding	ensembl	ENSDART00000027000.9	ENSDART00000027000
ENSDARG00000002194		NNN	1	1	1	1		ENSDARG00000002194.11	Rh blood group, D antigen	ZDB-GENE-051213-1	rh30	ZDB-GENE-051213-1	protein_coding	ensembl_havana_gene	ENSDART00000020663.9	ENSDART00000020663^ENSDART00000137566
ENSDARG00000002196		NGG	0.0528799	0.0528799	0.207549	0.403327		ENSDARG00000002196.9	BTB and CNC homology 1, basic leucine zipper transcription factor 1 b	ZDB-GENE-050522-220	—	—	protein_coding	ensembl	ENSDART00000164375.2	ENSDART00000047541^ENSDART00000164375
ENSDARG00000002197		NNN	0.907759	0.907759	0.986553	1		ENSDARG00000002197.11	phosphorylase, glycogen, liver	ZDB-GENE-041205-1	pygl	—	protein_coding	ensembl_havana_gene	ENSDART00000149011.2	ENSDART00000023449^ENSDART00000149011
ENSDARG00000002204		NNN	0.716098	0.999567	0.716098	0.774483		ENSDARG00000002204.6	heat shock protein, alpha-crystallin-related, b11	ZDB-GENE-030131-5148	hspb11	ZDB-GENE-030131-5148	protein_coding	ensembl_havana_gene	ENSDART00000026430.6	ENSDART00000026430
ENSDARG00000002210		NNN	0.236221	0.56756	0.236221	0.457568		ENSDARG00000002210.13	serine/threonine kinase 25a	ZDB-GENE-041010-92	stk25a	ZDB-GENE-041010-92	protein_coding	ensembl_havana_gene	ENSDART00000149363.2	ENSDART00000148683^ENSDART00000149148^ENSDART00000149363^ENSDART00000150125
ENSDARG00000002213		NNN	0.0952586	0.905705	0.35056	0.0952586		ENSDARG00000002213.11	inversin	ZDB-GENE-020507-2	invs	ZDB-GENE-020507-2	protein_coding	ensembl_havana_gene	ENSDART00000015688.10	ENSDART00000015688^ENSDART00000157690
ENSDARG00000002215		NNB	0.0326867	0.968028	0.0326867	0.979833		ENSDARG00000002215.10	RNA 3'-terminal phosphate cyclase	ZDB-GENE-030131-9687	rtcd1	ZDB-GENE-030131-9687	protein_coding	ensembl_havana_gene	ENSDART00000021666.10	ENSDART00000021666^ENSDART00000149071
ENSDARG00000002216		SNN	0.0819785	0.999609	0.0819785	0.994432		ENSDARG00000002216.11	T-box 3a	ZDB-GENE-070209-80	tbx3b	ZDB-GENE-070209-80	protein_coding	ensembl_havana_gene	ENSDART00000006380.9	ENSDART00000006380
ENSDARG00000002217		NNN	0.998411	0.998411	1	1		ENSDARG00000002217.8	short coiled-coil protein b	ZDB-GENE-041010-41	scocb	ZDB-GENE-041010-41	protein_coding	ensembl_havana_gene	ENSDART00000021736.8	ENSDART00000021736
ENSDARG00000002219		NNN	0.998682	0.998682	0.999998	0.999991		ENSDARG00000002219.10	si:dkey-103j14.5	ZDB-GENE-090313-170	DKEY-103J14.6	—	protein_coding	ensembl_havana_gene	ENSDART00000132828.3	ENSDART00000051886^ENSDART00000132828
ENSDARG00000002220		NNN	0.968269	0.995712	0.994053	0.968269		ENSDARG00000002220.8	zgc:103692	ZDB-GENE-041010-15	—	—	protein_coding	ensembl	ENSDART00000015076.8	ENSDART00000015076
ENSDARG00000002230		NNN	0.702554	0.702554	1	1		ENSDARG00000002230.11	synaptophysin b	ZDB-GENE-040718-205	sypb	ZDB-GENE-040718-205	protein_coding	ensembl_havana_gene	ENSDART00000088240.6	ENSDART00000011453^ENSDART00000088240^ENSDART00000114173
ENSDARG00000002231		NGG	0.183564	0.223286	0.183564	0.185993		ENSDARG00000002231.9	phospholipid phosphatase 2a	ZDB-GENE-140703-2	—	—	protein_coding	ensembl	ENSDART00000006216.9	ENSDART00000006216
ENSDARG00000002235		NNN	0.0380186	0.634002	0.0968543	0.0380186		ENSDARG00000002235.8	matrix metallopeptidase 14a (membrane-inserted)	ZDB-GENE-030901-1	mmp14a	ZDB-GENE-030901-1	protein_coding	ensembl_havana_gene	ENSDART00000005884.8	ENSDART00000005884
ENSDARG00000002240		NNN	0.394831	0.919253	0.532785	0.394831		ENSDARG00000002240.8	proteasome subunit beta 6	ZDB-GENE-990415-216	psmb6	ZDB-GENE-990415-216	protein_coding	ensembl_havana_gene	ENSDART00000024082.7	ENSDART00000024082^ENSDART00000126779
ENSDARG00000002241		SNN	0.999715	0.999715	0.999954	0.999999		ENSDARG00000002241.6	potassium voltage-gated channel, shaker-related subfamily, member 2a	ZDB-GENE-131113-1	—	—	protein_coding	ensembl	ENSDART00000027398.6	ENSDART00000027398
ENSDARG00000002249		NNN	0.147987	0.34424	0.147987	0.160756		ENSDARG00000002249.11	thromboxane A synthase 1 (platelet)	ZDB-GENE-030131-8805	tbxas1	ZDB-GENE-030131-8805	protein_coding	ensembl_havana_gene	ENSDART00000144246.2	ENSDART00000144246
ENSDARG00000002255		NNN	0.987093	0.987093	1	1		ENSDARG00000002255.9	erythrocyte membrane protein band 4.1-like 3a	ZDB-GENE-040822-8	—	—	protein_coding	ensembl	ENSDART00000130310.3	ENSDART00000022349^ENSDART00000130310
ENSDARG00000002259		NPG	0.128558	0.499971	0.999883	0.128558		ENSDARG00000002259.10	carbonic anhydrase XV c	ZDB-GENE-061013-737	ca15c	ZDB-GENE-061013-737	protein_coding	ensembl_havana_gene	ENSDART00000112433.3	ENSDART00000112433
ENSDARG00000002264		NNN	0.970557	0.984613	0.970557	0.976982		ENSDARG00000002264.8	mitochondrial ribosomal protein L41	ZDB-GENE-050522-200	DKEY-266H7.3	—	protein_coding	ensembl_havana_gene	ENSDART00000012268.8	ENSDART00000012268^ENSDART00000188951
ENSDARG00000002267		NNN	0.39282	0.999896	0.39282	0.814789		ENSDARG00000002267.9	ddb1 and cul4 associated factor 13	ZDB-GENE-040426-703	wdsof1	ZDB-GENE-040426-703	protein_coding	ensembl_havana_gene	ENSDART00000015139.8	ENSDART00000015139^ENSDART00000139307^ENSDART00000148355
ENSDARG00000002271		NGG	0.140053	0.140053	0.792468	0.913486		ENSDARG00000002271.8	zinc finger, AN1-type domain 5b	ZDB-GENE-040426-875	zfand5b	—	protein_coding	ensembl_havana_gene	ENSDART00000024450.8	ENSDART00000024450^ENSDART00000139259^ENSDART00000188770
ENSDARG00000002285		NNN	0.924674	0.991137	0.924674	0.996003		ENSDARG00000002285.9	mucolipin 1a	ZDB-GENE-040426-2704	mcoln1	ZDB-GENE-040426-2704	protein_coding	ensembl_havana_gene	ENSDART00000146101.2	ENSDART00000146101
ENSDARG00000002293		SGG	0.190583	0.997496	0.190583	0.348183		ENSDARG00000002293.12	si:ch211-197g15.6	ZDB-GENE-050208-457	CH211-197G15.9	ZDB-GENE-050208-617	protein_coding	ensembl_havana_gene	ENSDART00000105455.6	ENSDART00000105455^ENSDART00000160415
ENSDARG00000002295		NNN	0.330331	0.869629	0.330331	0.936626		ENSDARG00000002295.10	si:dkey-21p1.3	ZDB-GENE-081105-162	DKEY-21P1.3	—	protein_coding	havana	ENSDART00000134775.2	ENSDART00000134775
ENSDARG00000002298		SGG	0.563866	0.999998	0.563866	0.582478		ENSDARG00000002298.5	ankyrin repeat domain 22	ZDB-GENE-040426-1120	ankrd22	ZDB-GENE-040426-1120	protein_coding	ensembl_havana_gene	ENSDART00000028003.5	ENSDART00000028003
ENSDARG00000002299		NGG	0.0536873	0.0536873	0.601311	0.670576		ENSDARG00000002299.12	arylsulfatase H	ZDB-GENE-081104-120	—	—	protein_coding	ensembl	ENSDART00000181886.1	ENSDART00000032992^ENSDART00000181886
ENSDARG00000002300		NNN	0.623304	0.623304	0.768608	0.977993		ENSDARG00000002300.10	purinergic receptor P2X, ligand-gated ion channel, 2	ZDB-GENE-030319-2	p2rx2	ZDB-GENE-030319-2	protein_coding	ensembl_havana_gene	ENSDART00000019461.9	ENSDART00000019461^ENSDART00000190310
ENSDARG00000002304		NNN	0.422839	0.984117	0.571376	0.422839		ENSDARG00000002304.8	GINS complex subunit 2	ZDB-GENE-050419-19	DKEY-265O13.3	—	protein_coding	ensembl_havana_gene	ENSDART00000033746.7	ENSDART00000033746
ENSDARG00000002305		NPG	0.0314429	0.0314429	0.990597	0.405693		ENSDARG00000002305.10	malic enzyme 3, NADP(+)-dependent, mitochondrial	ZDB-GENE-041111-294	CH211-218D20.8	ZDB-GENE-041111-294	protein_coding	ensembl_havana_gene	ENSDART00000012385.9	ENSDART00000012385
ENSDARG00000002311		NNN	0.528702	0.528702	0.71895	0.995467		ENSDARG00000002311.9	fatty acid binding protein 11b	ZDB-GENE-050522-391	CH211-237B12.2	ZDB-GENE-050522-391	protein_coding	ensembl_havana_gene	ENSDART00000012718.7	ENSDART00000012718
ENSDARG00000002330		NNN	0.594657	0.594657	0.999689	0.997722		ENSDARG00000002330.8	LIM homeobox 8a	ZDB-GENE-031008-2	lhx8	ZDB-GENE-031008-2	protein_coding	ensembl_havana_gene	ENSDART00000019078.5	ENSDART00000019078^ENSDART00000132313^ENSDART00000144982
ENSDARG00000002332		NBB	0.182359	0.182359	0.99993	0.999283		ENSDARG00000002332.12	FERM domain containing 6	ZDB-GENE-050522-354	DKEY-249P9.2	ZDB-GENE-050522-354	protein_coding	ensembl_havana_gene	ENSDART00000138104.3	ENSDART00000024386^ENSDART00000137328^ENSDART00000138104
ENSDARG00000002333		NNN	0.988191	0.988191	0.999951	0.999999		ENSDARG00000002333.10	family with sequence similarity 102, member B, b	ZDB-GENE-041014-330	fam102bb	ZDB-GENE-041014-330	protein_coding	ensembl_havana_gene	ENSDART00000020183.9	ENSDART00000020183
ENSDARG00000002336		NNN	0.10773	1	0.10773	0.430242		ENSDARG00000002336.8	deltaC	ZDB-GENE-000125-4	dlc	ZDB-GENE-000125-4	protein_coding	ensembl_havana_gene	ENSDART00000018514.8	ENSDART00000018514^ENSDART00000148359
ENSDARG00000002339		NNN	0.777498	0.777498	0.999579	0.999877		ENSDARG00000002339.11	SAGA complex associated factor 29	ZDB-GENE-041010-62	CH211-66P13.4	ZDB-GENE-041010-62	protein_coding	ensembl_havana_gene	ENSDART00000007726.10	ENSDART00000007726^ENSDART00000124063^ENSDART00000144369
ENSDARG00000002344		NNN	0.0365083	0.755832	0.078281	0.0365083		ENSDARG00000002344.9	tubulin, beta 4B class IVb	ZDB-GENE-030131-8625	tubb2c	ZDB-GENE-030131-8625	protein_coding	ensembl_havana_gene	ENSDART00000041279.6	ENSDART00000041279^ENSDART00000147341
ENSDARG00000002347		NNN	0.644587	0.981408	0.903935	0.644587		ENSDARG00000002347.12	cytochrome P450, family 11, subfamily A, polypeptide 1	ZDB-GENE-010306-1	cyp11a1	ZDB-GENE-010306-1	protein_coding	ensembl_havana_gene	ENSDART00000024866.10	ENSDART00000024866^ENSDART00000073566^ENSDART00000153492^ENSDART00000154065^ENSDART00000154376
ENSDARG00000002353		SBG	0.0290586	0.98794	0.999239	0.0290586		ENSDARG00000002353.10	T cell activation RhoGTPase activating protein a	ZDB-GENE-040426-1877	CH211-283F6.4	ZDB-GENE-040426-1877	protein_coding	ensembl_havana_gene	ENSDART00000147557.2	ENSDART00000147557^ENSDART00000177422^ENSDART00000189482
ENSDARG00000002355		NNN	0.503736	0.664009	0.503736	0.717233		ENSDARG00000002355.10	sedoheptulokinase	ZDB-GENE-060526-357	DKEY-9E15.3	—	protein_coding	ensembl_havana_gene	ENSDART00000156372.3	ENSDART00000020044^ENSDART00000156372
ENSDARG00000002362		NNN	0.736408	0.736408	0.999971	0.999998		ENSDARG00000002362.11	UBA-like domain containing 1a	ZDB-GENE-040718-191	CH211-86M22.2	ZDB-GENE-040718-191	protein_coding	ensembl_havana_gene	ENSDART00000153387.3	ENSDART00000112768^ENSDART00000153387^ENSDART00000158412
ENSDARG00000002365		SGG	0.031336	0.999999	0.0422338	0.031336		ENSDARG00000002365.7	ceramide synthase 5	ZDB-GENE-030131-1740	cers5	ZDB-GENE-030131-1740	protein_coding	ensembl_havana_gene	ENSDART00000011076.7	ENSDART00000011076
ENSDARG00000002369		SPG	0.141846	0.988846	0.998385	0.141846		ENSDARG00000002369.10	si:ch211-202a12.4	ZDB-GENE-030131-8486	CH211-202A12.4	—	protein_coding	havana	ENSDART00000035235.8	ENSDART00000035235
ENSDARG00000002377		NGG	0.419544	0.419544	0.708787	0.823457		ENSDARG00000002377.12	mitochondrial elongation factor 2	ZDB-GENE-060929-864	smcr7	ZDB-GENE-060929-864	protein_coding	ensembl_havana_gene	ENSDART00000141283.2	ENSDART00000103626^ENSDART00000121439^ENSDART00000141283
ENSDARG00000002385		NNG	0.20123	0.991632	0.20123	0.784317		ENSDARG00000002385.10	ATM serine/threonine kinase	ZDB-GENE-040809-1	atm	ZDB-GENE-040809-1	protein_coding	ensembl_havana_gene	ENSDART00000002922.9	ENSDART00000002922^ENSDART00000152725
ENSDARG00000002391		SGG	0.0961049	1	0.115145	0.0961049		ENSDARG00000002391.7	TLC domain containing 1	ZDB-GENE-041010-173	tlcd1	ZDB-GENE-041010-173	protein_coding	ensembl_havana_gene	ENSDART00000027848.7	ENSDART00000027848
ENSDARG00000002394		NNN	0.318431	0.318431	0.903574	0.66761		ENSDARG00000002394.10	UDP glucuronosyltransferase 5 family, polypeptide D1	ZDB-GENE-091118-36	CH211-250C16.1	—	protein_coding	ensembl_havana_gene	ENSDART00000140308.2	ENSDART00000140308
ENSDARG00000002396		NGG	0.0905175	0.10221	0.199926	0.0905175		ENSDARG00000002396.8	cryptochrome DASH	ZDB-GENE-040617-2	cry-dash	ZDB-GENE-040617-2	protein_coding	ensembl_havana_gene	ENSDART00000139329.2	ENSDART00000139329
ENSDARG00000002401		SPP	0.990671	0.999984	0.999981	0.990671		ENSDARG00000002401.9	UDP-galactose-4-epimerase	ZDB-GENE-060421-6479	CH211-195O20.1	ZDB-GENE-060421-6479	protein_coding	ensembl_havana_gene	ENSDART00000187980.1	ENSDART00000135569^ENSDART00000136142^ENSDART00000184984^ENSDART00000187980^ENSDART00000193661
ENSDARG00000002402		NNN	0.992075	0.998837	0.992075	0.999203		ENSDARG00000002402.10	excision repair cross-complementation group 3	ZDB-GENE-030131-3043	ercc3	—	protein_coding	ensembl_havana_gene	ENSDART00000013066.8	ENSDART00000013066
ENSDARG00000002403		NNN	0.999977	0.999993	1	0.999977		ENSDARG00000002403.10	nucleolar and spindle associated protein 1	ZDB-GENE-030827-5	nusap1	ZDB-GENE-030827-5	protein_coding	ensembl_havana_gene	ENSDART00000003314.9	ENSDART00000003314
ENSDARG00000002405		NNN	0.174407	0.9687	0.174407	0.22287		ENSDARG00000002405.10	si:ch211-225b11.1	ZDB-GENE-060531-39	CH211-225B11.1	—	protein_coding	ensembl_havana_gene	ENSDART00000147639.2	ENSDART00000098682^ENSDART00000147639
ENSDARG00000002406		NNN	0.253467	0.999957	0.737475	0.253467		ENSDARG00000002406.10	zinc finger, MYND-type containing 10	ZDB-GENE-040426-1218	CH73-207I17.2	ZDB-GENE-040426-1218	protein_coding	ensembl_havana_gene	ENSDART00000017413.10	ENSDART00000017413
ENSDARG00000002411		SBB	0.993958	0.993958	0.998895	0.998492		ENSDARG00000002411.13	phosphodiesterase 4C, cAMP-specific b	ZDB-GENE-030131-4075	crtc1	ZDB-GENE-041210-266	protein_coding	ensembl_havana_gene	ENSDART00000139454.4	ENSDART00000104292^ENSDART00000139454^ENSDART00000163397^ENSDART00000182089^ENSDART00000187046
ENSDARG00000002445		NGG	0.387437	0.387437	0.551645	0.531073		ENSDARG00000002445.7	PR domain containing 1a, with ZNF domain	ZDB-GENE-030131-2193	prdm1a	ZDB-GENE-030131-2193	protein_coding	ensembl_havana_gene	ENSDART00000017445.7	ENSDART00000017445
ENSDARG00000002463		NPP	0.0789789	0.0789789	1	0.999997		ENSDARG00000002463.10	Rho guanine nucleotide exchange factor (GEF) 37	ZDB-GENE-100514-3	DKEY-282E7.1	—	protein_coding	ensembl_havana_gene	ENSDART00000106039.5	ENSDART00000106039^ENSDART00000187513
ENSDARG00000002467		NNN	0.995734	0.995734	0.99998	0.999999		ENSDARG00000002467.8	retinol dehydrogenase 14b	ZDB-GENE-030131-6605	rdh14b	ZDB-GENE-030131-6605	protein_coding	ensembl_havana_gene	ENSDART00000025330.8	ENSDART00000025330
ENSDARG00000002479		NNG	0.326323	0.970104	0.326323	0.498585		ENSDARG00000002479.8	excision repair cross-complementation group 6-like	ZDB-GENE-060531-56	CH211-278B8.3	—	protein_coding	ensembl_havana_gene	ENSDART00000015401.7	ENSDART00000015401
ENSDARG00000002483		SGG	0.401976	0.98879	0.518035	0.401976		ENSDARG00000002483.8	wingless-type MMTV integration site family, member 7Ab	ZDB-GENE-100922-44	—	—	protein_coding	ensembl	ENSDART00000081821.3	ENSDART00000081821^ENSDART00000192762
ENSDARG00000002487		NNN	0.117356	0.999972	0.117356	0.644033		ENSDARG00000002487.12	NOC3-like DNA replication regulator	ZDB-GENE-030131-9878	noc3l	ZDB-GENE-030131-9878	protein_coding	ensembl_havana_gene	ENSDART00000028043.9	ENSDART00000028043^ENSDART00000123511^ENSDART00000152622
ENSDARG00000002494		NBB	0.0315117	0.0315117	0.997963	0.99682		ENSDARG00000002494.9	integrin, beta 6	ZDB-GENE-100812-2	CH211-153G16.1	ZDB-GENE-090218-34	protein_coding	ensembl_havana_gene	ENSDART00000065933.6	ENSDART00000065933^ENSDART00000160488^ENSDART00000192872
ENSDARG00000002506		NNN	0.680392	0.939821	0.820613	0.680392		ENSDARG00000002506.8	zgc:92818	ZDB-GENE-040718-217	CH73-283L9.7	—	protein_coding	ensembl_havana_gene	ENSDART00000018972.8	ENSDART00000018972^ENSDART00000174258^ENSDART00000174259
ENSDARG00000002507		NNN	0.983783	1	0.983783	0.994446		ENSDARG00000002507.12	integrin, alpha 10	ZDB-GENE-100922-54	itga10	ZDB-GENE-100922-54	protein_coding	ensembl_havana_gene	ENSDART00000139859.3	ENSDART00000011224^ENSDART00000139859^ENSDART00000186784
ENSDARG00000002508		SNN	0.678362	0.999575	0.678362	0.751939		ENSDARG00000002508.9	ankyrin repeat domain 33Ab	ZDB-GENE-100729-1	DKEY-195M11.10	—	protein_coding	havana	ENSDART00000023686.9	ENSDART00000023686^ENSDART00000155088
ENSDARG00000002509		SPG	0.0886482	1	0.99105	0.0886482		ENSDARG00000002509.11	zgc:153911	ZDB-GENE-061013-174	CH211-67F13.4	ZDB-GENE-061013-174	protein_coding	ensembl_havana_gene	ENSDART00000075299.6	ENSDART00000075299
ENSDARG00000002510		NNN	0.536611	0.536611	0.992135	0.999703		ENSDARG00000002510.9	diencephalon/mesencephalon homeobox 1b	ZDB-GENE-050417-97	—	—	protein_coding	ensembl	ENSDART00000026693.9	ENSDART00000026693
ENSDARG00000002523		NGN	0.0660324	0.726131	0.205306	0.0660324		ENSDARG00000002523.9	hydroxysteroid dehydrogenase like 2	ZDB-GENE-030131-1066	hsdl2	—	protein_coding	ensembl_havana_gene	ENSDART00000038888.8	ENSDART00000038888^ENSDART00000155333^ENSDART00000155742
ENSDARG00000002533		NBB	0.848212	0.848212	0.992055	0.997792		ENSDARG00000002533.10	adenosine A2b receptor	ZDB-GENE-060511-1	DKEY-13B16.1	—	protein_coding	ensembl_havana_gene	ENSDART00000144469.2	ENSDART00000144469^ENSDART00000191749
ENSDARG00000002536		NGG	0.0260094	0.0260094	0.688485	0.886544		ENSDARG00000002536.10	transmembrane 9 superfamily protein member 4	ZDB-GENE-040426-1575	tm9sf4	ZDB-GENE-040426-1575	protein_coding	ensembl_havana_gene	ENSDART00000006765.9	ENSDART00000006765
ENSDARG00000002538		NNN	0.872791	0.994379	0.935843	0.872791		ENSDARG00000002538.8	SMU1, DNA replication regulator and spliceosomal factor a	ZDB-GENE-040426-916	smu1a	ZDB-GENE-040426-916	protein_coding	ensembl_havana_gene	ENSDART00000098346.4	ENSDART00000098346^ENSDART00000169348^ENSDART00000169567
ENSDARG00000002546		NNN	0.999874	0.999874	1	1		ENSDARG00000002546.12	RUN domain containing 3Ab	ZDB-GENE-040426-842	rap2ip	ZDB-GENE-040426-842	protein_coding	ensembl_havana_gene	ENSDART00000123712.2	ENSDART00000123712^ENSDART00000137081
ENSDARG00000002549		NNN	0.806455	0.999968	0.806455	0.926653		ENSDARG00000002549.13	eukaryotic translation initiation factor 3, subunit E, b	ZDB-GENE-050208-283	eif3eb	ZDB-GENE-030131-3827	protein_coding	ensembl_havana_gene	ENSDART00000135651.3	ENSDART00000023926^ENSDART00000135651^ENSDART00000136295^ENSDART00000150052^ENSDART00000150189
ENSDARG00000002552		NGG	0.678392	0.784593	0.735914	0.678392		ENSDARG00000002552.9	mitogen-activated protein kinase-activated protein kinase 2a	ZDB-GENE-030131-5532	mapkapk2a	ZDB-GENE-030131-5532	protein_coding	ensembl_havana_gene	ENSDART00000027532.9	ENSDART00000027532
ENSDARG00000002564		NNN	0.999266	0.999999	0.999266	0.999998		ENSDARG00000002564.7	synaptogyrin 1a	ZDB-GENE-041010-169	syngr1	—	protein_coding	ensembl_havana_gene	ENSDART00000003939.7	ENSDART00000003939
ENSDARG00000002571		SGG	0.923625	0.998227	0.923625	0.932973		ENSDARG00000002571.11	tropomodulin 2	ZDB-GENE-040912-185	CH211-12A1.6	ZDB-GENE-040912-185	protein_coding	ensembl_havana_gene	ENSDART00000012164.10	ENSDART00000012164
ENSDARG00000002576		NNN	0.993367	0.999753	0.993367	0.999992		ENSDARG00000002576.10	calcium binding protein 5a	ZDB-GENE-040426-1655	CH211-136M16.3	ZDB-GENE-040426-1655	protein_coding	ensembl_havana_gene	ENSDART00000144067.3	ENSDART00000144067^ENSDART00000192042
ENSDARG00000002582		NNN	0.854067	0.999986	0.992249	0.854067		ENSDARG00000002582.10	T-box 15	ZDB-GENE-020529-1	tbx15	ZDB-GENE-020529-1	protein_coding	ensembl_havana_gene	ENSDART00000004333.10	ENSDART00000004333^ENSDART00000124533^ENSDART00000180257
ENSDARG00000002587		NNN	0.999965	0.999965	1	1		ENSDARG00000002587.10	dihydropyrimidinase-like 3	ZDB-GENE-050720-2	dpysl3	ZDB-GENE-050720-2	protein_coding	ensembl_havana_gene	ENSDART00000065097.7	ENSDART00000065097^ENSDART00000138329
ENSDARG00000002589		NNN	0.436805	0.940125	0.436805	0.664136		ENSDARG00000002589.11	myosin light chain, phosphorylatable, fast skeletal muscle b	ZDB-GENE-040912-115	DKEY-1M3.2	ZDB-GENE-040912-115	protein_coding	ensembl_havana_gene	ENSDART00000003847.9	ENSDART00000003847^ENSDART00000135036
ENSDARG00000002591		NNN	0.983897	0.999828	0.983897	0.994344		ENSDARG00000002591.10	RuvB-like AAA ATPase 1	ZDB-GENE-030109-2	ruvbl1	ZDB-GENE-030109-2	protein_coding	ensembl_havana_gene	ENSDART00000011931.10	ENSDART00000011931^ENSDART00000142652
ENSDARG00000002593		NNN	0.737627	0.921934	0.925855	0.737627		ENSDARG00000002593.9	solute carrier family 45, member 2	ZDB-GENE-050208-97	slc45a2	ZDB-GENE-050208-97	protein_coding	ensembl_havana_gene	ENSDART00000030887.8	ENSDART00000030887
ENSDARG00000002597		NNN	0.559082	0.982192	0.559082	0.6386		ENSDARG00000002597.11	poly(A) binding protein, cytoplasmic 1-like	ZDB-GENE-030131-5836	CH1073-323J3.1	ZDB-GENE-030131-5836	protein_coding	ensembl_havana_gene	ENSDART00000126848.4	ENSDART00000126848^ENSDART00000134161^ENSDART00000142322^ENSDART00000145011^ENSDART00000183560^ENSDART00000185024
ENSDARG00000002600		NNN	0.999856	0.999856	0.999965	0.999994		ENSDARG00000002600.7	proprotein convertase subtilisin/kexin type 1	ZDB-GENE-071009-1	pcsk1	DKEY-6B12.3;ZDB-GENE-071009-1	protein_coding	ensembl_havana_gene	ENSDART00000014668.5	ENSDART00000014668^ENSDART00000147473
ENSDARG00000002601		NNN	0.43312	0.896899	0.43312	0.99797		ENSDARG00000002601.8	iroquois homeobox 7	ZDB-GENE-020103-1	irx7	ZDB-GENE-020103-1	protein_coding	ensembl_havana_gene	ENSDART00000011627.8	ENSDART00000011627
ENSDARG00000002607		NNN	0.999996	0.999996	1	1		ENSDARG00000002607.10	un-named sa1614	ZDB-GENE-120411-1	asap1	—	protein_coding	havana	ENSDART00000103507.5	ENSDART00000103507
ENSDARG00000002609		NNN	1	1	1	1		ENSDARG00000002609.11	ring finger protein 145a	ZDB-GENE-111012-3	rnf145a	ZDB-GENE-111012-3	protein_coding	ensembl_havana_gene	ENSDART00000004550.11	ENSDART00000004550^ENSDART00000184271
ENSDARG00000002613		NNN	0.404505	0.876184	0.418788	0.404505		ENSDARG00000002613.5	replication protein A3	ZDB-GENE-040426-977	DKEY-119M17.3	—	protein_coding	ensembl_havana_gene	ENSDART00000018553.5	ENSDART00000018553
ENSDARG00000002632		SGG	0.549498	0.99998	0.633568	0.549498		ENSDARG00000002632.12	annexin A11b	ZDB-GENE-030707-5	anxa11b	ZDB-GENE-030707-5	protein_coding	ensembl_havana_gene	ENSDART00000149089.3	ENSDART00000149089^ENSDART00000149200^ENSDART00000152846
ENSDARG00000002634		SPP	0.999898	0.999898	1	1		ENSDARG00000002634.13	UDP-Gal:betaGlcNAc beta 1,4- galactosyltransferase, polypeptide 1	ZDB-GENE-050417-236	b4galt1	ZDB-GENE-050417-236	protein_coding	ensembl_havana_gene	ENSDART00000166429.2	ENSDART00000162146^ENSDART00000166429
ENSDARG00000002635		NNN	0.999831	0.999831	1	1		ENSDARG00000002635.12	zgc:85722	ZDB-GENE-040516-7	CH211-270G19.4	ZDB-GENE-040516-7	protein_coding	ensembl_havana_gene	ENSDART00000005313.10	ENSDART00000005313
ENSDARG00000002642		NNN	0.109194	0.993576	0.47717	0.109194		ENSDARG00000002642.11	SH3-domain GRB2-like 1b	ZDB-GENE-031001-6	sh3gl1b	ZDB-GENE-031001-6	protein_coding	ensembl_havana_gene	ENSDART00000100491.6	ENSDART00000100491^ENSDART00000169043
ENSDARG00000002644		SNN	0.225584	0.999943	0.225584	0.998826		ENSDARG00000002644.9	regulator of G protein signaling 5a	ZDB-GENE-030131-7570	rsg5a	ZDB-GENE-030131-7570	protein_coding	ensembl_havana_gene	ENSDART00000127612.4	ENSDART00000073784^ENSDART00000127612
ENSDARG00000002656		NNN	0.993919	0.993919	1	1		ENSDARG00000002656.12	syntaxin binding protein 5a (tomosyn)	ZDB-GENE-041001-161	stxbp5a	ZDB-GENE-041001-161	protein_coding	ensembl_havana_gene	ENSDART00000142806.3	ENSDART00000133788^ENSDART00000139417^ENSDART00000142806
ENSDARG00000002659		NNN	0.944703	0.994939	0.944703	0.995209		ENSDARG00000002659.11	microtubule-associated protein, RP/EB family, member 1b	ZDB-GENE-040426-2256	mapre1	ZDB-GENE-040426-2256	protein_coding	ensembl_havana_gene	ENSDART00000004474.9	ENSDART00000004474^ENSDART00000133602^ENSDART00000136740
ENSDARG00000002663		SGG	0.717344	0.999539	0.717344	0.763554		ENSDARG00000002663.11	optineurin	ZDB-GENE-030131-8103	optn	ZDB-GENE-030131-8103	protein_coding	ensembl_havana_gene	ENSDART00000014036.11	ENSDART00000014036^ENSDART00000133616
ENSDARG00000002666		NNN	0.664186	0.931312	0.664186	0.843663		ENSDARG00000002666.5	potassium inwardly-rectifying channel, subfamily J, member 1b	ZDB-GENE-070620-9	CH73-232H9.2	ZDB-GENE-070620-9	protein_coding	ensembl_havana_gene	ENSDART00000019267.5	ENSDART00000019267
ENSDARG00000002670		NNN	0.987898	0.987898	0.999989	0.996544		ENSDARG00000002670.12	zgc:113944	ZDB-GENE-050913-155	CH73-132G21.1	ZDB-GENE-050913-155	protein_coding	ensembl_havana_gene	ENSDART00000018683.11	ENSDART00000018683^ENSDART00000097274
ENSDARG00000002682		NNN	0.949292	0.949292	1	0.999999		ENSDARG00000002682.10	tubulin folding cofactor E-like a	ZDB-GENE-040426-1719	tbcela	ZDB-GENE-040426-1719	protein_coding	ensembl_havana_gene	ENSDART00000006910.8	ENSDART00000006910^ENSDART00000135770^ENSDART00000138166^ENSDART00000141015^ENSDART00000185548
ENSDARG00000002685		NNN	0.200171	0.595894	0.200171	0.781836		ENSDARG00000002685.9	family with sequence similarity 113	ZDB-GENE-041212-23	fam113	ZDB-GENE-041212-23	protein_coding	ensembl_havana_gene	ENSDART00000012483.9	ENSDART00000012483^ENSDART00000131530^ENSDART00000139455^ENSDART00000179766^ENSDART00000180892
ENSDARG00000002690		NNN	0.766306	0.837419	0.766306	0.818793		ENSDARG00000002690.9	RAB interacting factor	ZDB-GENE-040718-216	rabif	—	protein_coding	ensembl_havana_gene	ENSDART00000115356.4	ENSDART00000115356^ENSDART00000141730^ENSDART00000142327^ENSDART00000146838
ENSDARG00000002696		NNN	0.0669502	0.0669502	0.965137	1		ENSDARG00000002696.10	guanine nucleotide binding protein (G protein), beta polypeptide 3b	ZDB-GENE-040426-2280	gnb3b	ZDB-GENE-040426-2280	protein_coding	ensembl_havana_gene	ENSDART00000005547.8	ENSDART00000005547^ENSDART00000132642^ENSDART00000151093^ENSDART00000151246^ENSDART00000151787
ENSDARG00000002701		NNN	0.336794	0.686724	0.336794	0.912037		ENSDARG00000002701.9	RAS-like, family 12	ZDB-GENE-040426-1201	—	—	protein_coding	ensembl	ENSDART00000172804.2	ENSDART00000018801^ENSDART00000115054^ENSDART00000172804^ENSDART00000180808
ENSDARG00000002707		NNN	0.374309	0.999335	0.374309	0.840236		ENSDARG00000002707.10	hairy-related 11	ZDB-GENE-040824-4	her11	ZDB-GENE-040824-4	protein_coding	ensembl_havana_gene	ENSDART00000026907.6	ENSDART00000026907
ENSDARG00000002710		NNN	0.0941741	0.999805	0.0941741	0.297403		ENSDARG00000002710.10	nucleolin	ZDB-GENE-030131-6986	CH1073-141J18.2	ZDB-GENE-060929-934	protein_coding	ensembl_havana_gene	ENSDART00000124698.4	ENSDART00000017188^ENSDART00000124698^ENSDART00000130171^ENSDART00000141088^ENSDART00000147402
ENSDARG00000002720		NNN	0.172944	0.999948	0.172944	0.561878		ENSDARG00000002720.9	utp15, U3 small nucleolar ribonucleoprotein, homolog	ZDB-GENE-030131-3831	utp15	ZDB-GENE-030131-3831	protein_coding	ensembl_havana_gene	ENSDART00000127397.3	ENSDART00000127397^ENSDART00000148774
ENSDARG00000002722		NNN	0.0456822	0.548946	0.0456822	0.187826		ENSDARG00000002722.9	ankyrin repeat domain 2 (stretch responsive muscle)	ZDB-GENE-090313-383	DKEYP-34H12.6	—	protein_coding	havana	ENSDART00000074829.5	ENSDART00000074829
ENSDARG00000002728		NNN	0.550286	0.550286	0.999864	1		ENSDARG00000002728.12	KISS1 receptor a	ZDB-GENE-070912-521	DKEY-31M5.9	—	protein_coding	ensembl_havana_gene	ENSDART00000124647.4	ENSDART00000124647
ENSDARG00000002731		NGG	0.188136	0.280922	0.415396	0.188136		ENSDARG00000002731.9	syndecan 2	ZDB-GENE-021206-3	sdc2	ZDB-GENE-021206-3	protein_coding	ensembl_havana_gene	ENSDART00000141437.3	ENSDART00000141437
ENSDARG00000002732		NNN	0.948082	0.948082	0.965305	0.999802		ENSDARG00000002732.9	spondin 2b, extracellular matrix protein	ZDB-GENE-990415-161	spon2b	ZDB-GENE-990415-161	protein_coding	ensembl_havana_gene	ENSDART00000010148.5	ENSDART00000010148^ENSDART00000054590
ENSDARG00000002745		NNG	0.0396914	0.915965	0.0396914	0.833966		ENSDARG00000002745.10	L-threonine dehydrogenase	ZDB-GENE-040426-2379	tdh	ZDB-GENE-040426-2379	protein_coding	ensembl_havana_gene	ENSDART00000025509.7	ENSDART00000025509^ENSDART00000132928^ENSDART00000147105^ENSDART00000152380^ENSDART00000152778^ENSDART00000152811
ENSDARG00000002748		NNN	0.993585	0.993585	0.999946	1		ENSDARG00000002748.11	sema domain, transmembrane domain (TM), and cytoplasmic domain, (semaphorin) 6D	ZDB-GENE-040426-1933	sema6d	ZDB-GENE-040426-1933	protein_coding	ensembl_havana_gene	ENSDART00000136361.2	ENSDART00000136361
ENSDARG00000002750		NNN	0.794646	0.794646	1	1		ENSDARG00000002750.11	PHD finger protein 20, a	ZDB-GENE-070912-270	phf20a	ZDB-GENE-070912-270	protein_coding	havana	ENSDART00000123263.4	ENSDART00000123263
ENSDARG00000002754		NNN	0.0496948	0.999211	0.0829627	0.0496948		ENSDARG00000002754.6	programmed cell death 2-like	ZDB-GENE-040426-967	CH211-93F2.2	ZDB-GENE-040426-967	protein_coding	ensembl_havana_gene	ENSDART00000003346.6	ENSDART00000003346
ENSDARG00000002758		NNN	0.546611	0.546611	0.920479	0.993931		ENSDARG00000002758.12	death effector domain-containing 1	ZDB-GENE-000616-2	dedd1	ZDB-GENE-000616-2	protein_coding	ensembl_havana_gene	ENSDART00000065467.7	ENSDART00000065467^ENSDART00000128762^ENSDART00000139760^ENSDART00000145839
ENSDARG00000002760		NNN	0.819671	0.819671	0.99866	0.994156		ENSDARG00000002760.5	growth differentiation factor 5	ZDB-GENE-990415-39	gdf5	ZDB-GENE-990415-39	protein_coding	ensembl_havana_gene	ENSDART00000015051.5	ENSDART00000015051^ENSDART00000149343
ENSDARG00000002764		NNN	0.342422	0.342422	0.805225	0.896		ENSDARG00000002764.9	myo-inositol oxygenase	ZDB-GENE-050913-113	CH73-30N17.2	ZDB-GENE-050913-113	protein_coding	ensembl_havana_gene	ENSDART00000140752.2	ENSDART00000140752
ENSDARG00000002768		NNN	0.437634	0.942445	0.437634	0.684124		ENSDARG00000002768.9	parvalbumin 2	ZDB-GENE-000322-4	pvalb2	ZDB-GENE-000322-4	protein_coding	ensembl_havana_gene	ENSDART00000010144.7	ENSDART00000010144^ENSDART00000143534
ENSDARG00000002771		NNN	0.518937	0.518937	0.86967	0.99992		ENSDARG00000002771.10	si:ch211-48m9.1	ZDB-GENE-060531-64	CH211-48M9.1	—	protein_coding	ensembl_havana_gene	ENSDART00000042002.7	ENSDART00000042002^ENSDART00000138140
ENSDARG00000002779		NNN	0.988127	1	0.999682	0.988127		ENSDARG00000002779.8	pancreatic and duodenal homeobox 1	ZDB-GENE-990415-122	pdx1	ZDB-GENE-990415-122	protein_coding	ensembl_havana_gene	ENSDART00000014696.8	ENSDART00000014696
ENSDARG00000002787		NNN	0.640656	0.640656	0.972572	0.931593		ENSDARG00000002787.11	transducin-like enhancer of split 3a	ZDB-GENE-990415-86	gro2	ZDB-GENE-990415-86	protein_coding	ensembl_havana_gene	ENSDART00000045679.9	ENSDART00000045679^ENSDART00000100632
ENSDARG00000002790		NNN	0.999856	0.999939	0.999856	0.999907		ENSDARG00000002790.9	adaptor-related protein complex 2, mu 1 subunit, b	ZDB-GENE-040426-1103	ap2m1a	ZDB-GENE-030131-9784	protein_coding	ensembl_havana_gene	ENSDART00000165548.2	ENSDART00000012442^ENSDART00000046587^ENSDART00000124051^ENSDART00000132903^ENSDART00000138472^ENSDART00000139499^ENSDART00000165548
ENSDARG00000002791		NGG	0.440456	0.440456	0.77104	0.862408		ENSDARG00000002791.11	ATPase Na+/K+ transporting subunit alpha 1a, tandem duplicate 1	ZDB-GENE-001212-1	atp1a1	ZDB-GENE-001212-1	protein_coding	ensembl_havana_gene	ENSDART00000081047.5	ENSDART00000081047^ENSDART00000132968^ENSDART00000135994^ENSDART00000136381^ENSDART00000137184^ENSDART00000147682
ENSDARG00000002792		NNN	0.0264183	0.332761	0.0264183	0.649017		ENSDARG00000002792.8	archain 1a	ZDB-GENE-021031-2	arcn1	ZDB-GENE-021031-2	protein_coding	ensembl_havana_gene	ENSDART00000014666.8	ENSDART00000014666
ENSDARG00000002795		NNN	0.569799	0.569799	0.999489	1		ENSDARG00000002795.11	myeloid ecotropic viral integration site 3	ZDB-GENE-010406-2	meis3	ZDB-GENE-010406-2	protein_coding	ensembl_havana_gene	ENSDART00000155128.3	ENSDART00000018945^ENSDART00000153815^ENSDART00000155128
ENSDARG00000002797		NNN	0.174667	0.809878	0.207452	0.174667		ENSDARG00000002797.6	—	—	—	—	protein_coding	ensembl	ENSDART00000056021.4	ENSDART00000056021
ENSDARG00000002798		NPG	0.0827623	0.0827623	0.980715	0.158376		ENSDARG00000002798.7	component of oligomeric golgi complex 8	ZDB-GENE-050320-74	—	—	protein_coding	ensembl	ENSDART00000013150.7	ENSDART00000013150
ENSDARG00000002816		NNN	0.751958	0.801955	0.751958	0.826938		ENSDARG00000002816.10	Ras protein-specific guanine nucleotide-releasing factor 2b	ZDB-GENE-060504-1	rasgrf2	ZDB-GENE-060504-1	protein_coding	ensembl_havana_gene	ENSDART00000083350.4	ENSDART00000083350
ENSDARG00000002826		NNN	0.707401	0.994879	0.91861	0.707401		ENSDARG00000002826.10	centrosomal protein 57, like 1	ZDB-GENE-040808-27	cep57l1	ZDB-GENE-040808-27	protein_coding	ensembl_havana_gene	ENSDART00000048537.6	ENSDART00000048537^ENSDART00000152984^ENSDART00000153405
ENSDARG00000002830		NNN	0.0886941	0.984385	0.0886941	0.670648		ENSDARG00000002830.8	tRNA methyltransferase 2 homolog A	ZDB-GENE-030131-6876	CH211-106A19.3	ZDB-GENE-030131-6876	protein_coding	ensembl_havana_gene	ENSDART00000046384.6	ENSDART00000046384^ENSDART00000142798^ENSDART00000182975
ENSDARG00000002831		SBB	0.999844	1	0.999844	0.999999		ENSDARG00000002831.12	collagen, type IV, alpha 4	ZDB-GENE-101001-1	col4a4	ZDB-GENE-101001-1	protein_coding	ensembl_havana_gene	ENSDART00000154476.3	ENSDART00000154476^ENSDART00000186765
ENSDARG00000002840		NNN	0.999854	0.999854	1	1		ENSDARG00000002840.12	si:dkey-28b4.8	ZDB-GENE-090501-2	DKEY-28B4.8	—	protein_coding	ensembl_havana_gene	ENSDART00000133210.3	ENSDART00000133210^ENSDART00000193926
ENSDARG00000002847		SBB	0.996618	0.99999	1	0.996618		ENSDARG00000002847.11	fibronectin type III domain containing 1	ZDB-GENE-041210-332	fndc1	ZDB-GENE-041210-332	protein_coding	havana	ENSDART00000014163.10	ENSDART00000014163^ENSDART00000136039
ENSDARG00000002872		NNN	0.959603	0.959603	0.999896	0.999985		ENSDARG00000002872.9	zgc:113210	ZDB-GENE-050320-83	DKEY-210J14.2	ZDB-GENE-050320-83	protein_coding	ensembl_havana_gene	ENSDART00000138018.2	ENSDART00000138018
ENSDARG00000002877		NNN	0.115279	0.937547	0.166932	0.115279		ENSDARG00000002877.12	RALBP1 associated Eps domain containing 1	ZDB-GENE-030131-9536	reps1	ZDB-GENE-030131-9536	protein_coding	ensembl_havana_gene	ENSDART00000132132.4	ENSDART00000132132^ENSDART00000153003
ENSDARG00000002880		NNN	0.785397	0.785397	0.961338	0.937383		ENSDARG00000002880.12	VPS50 EARP/GARPII complex subunit	ZDB-GENE-060503-325	ccdc132	ZDB-GENE-060503-325	protein_coding	ensembl_havana_gene	ENSDART00000110699.4	ENSDART00000110699^ENSDART00000146468
ENSDARG00000002894		NNN	0.780448	0.989845	0.780448	0.897031		ENSDARG00000002894.10	apoptosis, caspase activation inhibitor	ZDB-GENE-041001-171	aven	ZDB-GENE-041001-171	protein_coding	ensembl_havana_gene	ENSDART00000019759.9	ENSDART00000019759^ENSDART00000147064
ENSDARG00000002897		NNN	0.999543	0.999924	0.999543	0.999964		ENSDARG00000002897.10	si:ch211-160o17.2	ZDB-GENE-141219-3	inpp1	—	protein_coding	ensembl_havana_gene	ENSDART00000008133.10	ENSDART00000008133^ENSDART00000168203
ENSDARG00000002909		SGG	0.0543112	0.995553	0.0543112	0.381637		ENSDARG00000002909.11	tight junction protein 3	ZDB-GENE-030828-10	tjp3	ZDB-GENE-030828-10	protein_coding	ensembl_havana_gene	ENSDART00000012336.10	ENSDART00000012336^ENSDART00000137995^ENSDART00000139911^ENSDART00000147070
ENSDARG00000002912		NNN	0.953773	0.96075	0.953773	0.999332		ENSDARG00000002912.11	adiponectin receptor 1a	ZDB-GENE-040718-169	DKEY-13G7.2	—	protein_coding	ensembl_havana_gene	ENSDART00000131976.3	ENSDART00000082761^ENSDART00000131976^ENSDART00000186283
ENSDARG00000002916		NPG	0.0440258	0.540659	0.993944	0.0440258		ENSDARG00000002916.10	SEC31 homolog B, COPII coat complex component	ZDB-GENE-060418-2	sec31b	ZDB-GENE-060418-2	protein_coding	ensembl_havana_gene	ENSDART00000153126.3	ENSDART00000014190^ENSDART00000152895^ENSDART00000153110^ENSDART00000153126
ENSDARG00000002917		NNN	0.56588	0.999581	0.56588	0.979092		ENSDARG00000002917.11	glutaminase 2b (liver, mitochondrial)	ZDB-GENE-050208-408	DKEY-102C8.6	—	protein_coding	ensembl_havana_gene	ENSDART00000147580.3	ENSDART00000031005^ENSDART00000147580
ENSDARG00000002933		NNN	0.796294	0.796294	0.997794	0.998827		ENSDARG00000002933.8	gastrulation brain homeobox 2	ZDB-GENE-020509-2	gbx2	ZDB-GENE-020509-2	protein_coding	ensembl_havana_gene	ENSDART00000015333.8	ENSDART00000015333
ENSDARG00000002937		NBB	0.12985	0.12985	0.989291	0.997149		ENSDARG00000002937.12	Meis homeobox 1 a	ZDB-GENE-020122-3	meis4.1a	ZDB-GENE-020122-3	protein_coding	ensembl_havana_gene	ENSDART00000028018.11	ENSDART00000028018^ENSDART00000139705^ENSDART00000146352^ENSDART00000150433
ENSDARG00000002945		NNN	0.992394	0.999853	0.998944	0.992394		ENSDARG00000002945.13	biglycan b	ZDB-GENE-040426-21	DKEY-32E6.7	ZDB-GENE-040426-21	protein_coding	ensembl_havana_gene	ENSDART00000049836.9	ENSDART00000049836^ENSDART00000132095^ENSDART00000145464
ENSDARG00000002947		SPP	0.999802	0.999962	1	0.999802		ENSDARG00000002947.10	ATP-binding cassette, sub-family D (ALD), member 3b	ZDB-GENE-050517-29	abcd3b	ZDB-GENE-050517-29	protein_coding	ensembl_havana_gene	ENSDART00000005643.8	ENSDART00000005643
ENSDARG00000002949		NNN	0.776809	0.917895	0.776809	0.912973		ENSDARG00000002949.7	protein phosphatase 6, catalytic subunit	ZDB-GENE-040426-949	ppp6c	ZDB-GENE-040426-949	protein_coding	ensembl_havana_gene	ENSDART00000007458.7	ENSDART00000007458^ENSDART00000136124
ENSDARG00000002952		NNN	0.993324	0.993324	0.999765	0.995952		ENSDARG00000002952.8	smoothened, frizzled class receptor	ZDB-GENE-980526-89	smoh	ZDB-GENE-980526-89	protein_coding	ensembl_havana_gene	ENSDART00000005985.7	ENSDART00000005985
ENSDARG00000002956		NNN	0.991999	0.998945	0.995483	0.991999		ENSDARG00000002956.12	si:dkey-32n7.4	ZDB-GENE-110411-175	DKEY-32N7.4	ZDB-GENE-110411-175	protein_coding	ensembl_havana_gene	ENSDART00000025912.9	ENSDART00000025912^ENSDART00000153699
ENSDARG00000002959		NNN	0.103516	0.553899	0.180205	0.103516		ENSDARG00000002959.8	G protein-coupled receptor 34b	ZDB-GENE-040823-1	gpr34b	ZDB-GENE-040823-1	protein_coding	ensembl_havana_gene	ENSDART00000024795.8	ENSDART00000024795
ENSDARG00000002967		NGG	0.399689	0.935092	0.866328	0.399689		ENSDARG00000002967.9	pdgfa associated protein 1b	ZDB-GENE-040426-942	pdap1	—	protein_coding	ensembl_havana_gene	ENSDART00000018626.8	ENSDART00000018626
ENSDARG00000002968		NNN	0.977753	0.977753	0.986405	0.999811		ENSDARG00000002968.11	apobec1 complementation factor	ZDB-GENE-060824-3	a1cf	ZDB-GENE-060824-3	protein_coding	ensembl_havana_gene	ENSDART00000152292.2	ENSDART00000152292^ENSDART00000185434
ENSDARG00000002970		NNN	0.996887	0.996887	0.999998	1		ENSDARG00000002970.10	synovial sarcoma translocation, chromosome 18 (H. sapiens)	ZDB-GENE-030131-4867	—	—	protein_coding	ensembl	ENSDART00000011919.10	ENSDART00000011919^ENSDART00000164674
ENSDARG00000002971		NNN	0.946684	0.946684	0.980154	0.993478		ENSDARG00000002971.11	polyhomeotic homolog 1	ZDB-GENE-081022-39	DKEY-40M6.1	ZDB-GENE-081022-39	protein_coding	ensembl_havana_gene	ENSDART00000058496.7	ENSDART00000058496^ENSDART00000188334^ENSDART00000188643
ENSDARG00000002986		NNN	0.15327	0.16378	0.15327	0.268401		ENSDARG00000002986.10	guanine deaminase	ZDB-GENE-050522-434	CH211-200L16.1	ZDB-GENE-050522-434	protein_coding	ensembl_havana_gene	ENSDART00000014013.9	ENSDART00000014013
ENSDARG00000002988		NNN	0.733114	0.984609	0.733114	0.862248		ENSDARG00000002988.10	troponin T2d, cardiac	ZDB-GENE-050626-97	DKEY-206M15.3	ZDB-GENE-050626-97	protein_coding	ensembl_havana_gene	ENSDART00000139235.3	ENSDART00000048642^ENSDART00000139235
ENSDARG00000002991		NNN	0.871024	0.871024	0.926625	0.887502		ENSDARG00000002991.13	centrosomal protein 135	ZDB-GENE-041210-325	DKEYP-117H8.1	ZDB-GENE-041210-325	protein_coding	ensembl_havana_gene	ENSDART00000033436.9	ENSDART00000033436^ENSDART00000121585^ENSDART00000185772
ENSDARG00000002994		NNN	0.166614	0.166614	0.945251	0.847391		ENSDARG00000002994.11	inositol-trisphosphate 3-kinase Ca	ZDB-GENE-030131-6009	CH211-191J22.2	—	protein_coding	ensembl_havana_gene	ENSDART00000148346.3	ENSDART00000148346
ENSDARG00000003008		NNN	0.0311067	0.0311067	0.998664	0.999993		ENSDARG00000003008.11	protein kinase C, epsilon a	ZDB-GENE-030131-8191	prkcea	ZDB-GENE-030131-8191	protein_coding	ensembl_havana_gene	ENSDART00000105608.6	ENSDART00000105608
ENSDARG00000003017		NGG	0.239554	0.439696	0.239554	0.878134		ENSDARG00000003017.9	ubiquitin conjugating enzyme E2 A, like	ZDB-GENE-030131-4195	CH211-235E18.1	ZDB-GENE-030131-4195	protein_coding	ensembl_havana_gene	ENSDART00000008490.9	ENSDART00000008490^ENSDART00000133899
ENSDARG00000003020		NNN	0.999055	0.999055	1	1		ENSDARG00000003020.7	leucine rich repeat containing 4.2	ZDB-GENE-030131-7997	DKEYP-113F10.1	—	protein_coding	havana	ENSDART00000007520.7	ENSDART00000007520
ENSDARG00000003021		NNN	0.932063	0.977084	0.932063	0.988587		ENSDARG00000003021.10	histone deacetylase 8	ZDB-GENE-040426-2772	hdac8	ZDB-GENE-040426-2772	protein_coding	ensembl_havana_gene	ENSDART00000009184.6	ENSDART00000009184^ENSDART00000132716^ENSDART00000136047^ENSDART00000174282^ENSDART00000174307
ENSDARG00000003022		NGG	0.146276	0.881928	0.433448	0.146276		ENSDARG00000003022.11	LIM domain kinase 1b	ZDB-GENE-110411-106	CH211-13L22.4	—	protein_coding	ensembl_havana_gene	ENSDART00000004686.10	ENSDART00000004686^ENSDART00000148513
ENSDARG00000003027		NNN	0.21094	0.762569	0.21094	0.679203		ENSDARG00000003027.8	sodium channel modifier 1	ZDB-GENE-030131-415	scnm1	ZDB-GENE-030131-415	protein_coding	ensembl_havana_gene	ENSDART00000004284.7	ENSDART00000004284^ENSDART00000132351^ENSDART00000133965
ENSDARG00000003032		NNN	0.24319	0.946532	0.667955	0.24319		ENSDARG00000003032.6	eukaryotic translation initiation factor 4A1B	ZDB-GENE-040120-6	eif4a1b	ZDB-GENE-040120-6	protein_coding	ensembl_havana_gene	ENSDART00000011878.6	ENSDART00000011878^ENSDART00000140602
ENSDARG00000003035		NNN	0.12462	0.998688	0.12462	0.610524		ENSDARG00000003035.10	heat shock protein 9	ZDB-GENE-030828-12	hspa9	ZDB-GENE-030828-12	protein_coding	ensembl_havana_gene	ENSDART00000012438.10	ENSDART00000012438^ENSDART00000136975
ENSDARG00000003041		NNN	0.634093	0.769137	0.674924	0.634093		ENSDARG00000003041.9	—	—	—	—	protein_coding	ensembl	ENSDART00000020834.9	ENSDART00000020834
ENSDARG00000003046		NNN	0.999146	0.999146	1	1		ENSDARG00000003046.11	sorbin and SH3 domain containing 2a	ZDB-GENE-070308-2	DKEY-256E7.9	—	protein_coding	ensembl_havana_gene	ENSDART00000041215.7	ENSDART00000041215^ENSDART00000138475
ENSDARG00000003054		NNN	0.237849	0.237849	0.698961	0.998969		ENSDARG00000003054.10	tachykinin receptor 3-like	ZDB-GENE-061207-19	CH211-217K17.1	ZDB-GENE-061207-19	protein_coding	ensembl_havana_gene	ENSDART00000003278.9	ENSDART00000003278
ENSDARG00000003058		NNN	0.74097	0.98813	0.74097	0.86789		ENSDARG00000003058.11	FGFR1 oncogene partner	ZDB-GENE-090417-1	ccr6a	ZDB-GENE-040625-126	protein_coding	ensembl_havana_gene	ENSDART00000010494.10	ENSDART00000010494^ENSDART00000131422^ENSDART00000137007^ENSDART00000153066^ENSDART00000159485
ENSDARG00000003061		NBB	0.24806	0.24806	0.999993	1		ENSDARG00000003061.13	CD276 molecule	ZDB-GENE-070112-452	cd276	ZDB-GENE-070112-452	protein_coding	ensembl_havana_gene	ENSDART00000150013.4	ENSDART00000033591^ENSDART00000149912^ENSDART00000150013
ENSDARG00000003068		NPG	0.138318	0.189917	0.990659	0.138318		ENSDARG00000003068.8	golgi reassembly stacking protein 1a	ZDB-GENE-030826-23	gorasp1	ZDB-GENE-041114-116	protein_coding	ensembl_havana_gene	ENSDART00000024619.6	ENSDART00000024619
ENSDARG00000003069		NNN	0.87299	0.87299	0.993591	0.989615		ENSDARG00000003069.9	BTB (POZ) domain containing 7	ZDB-GENE-030131-4477	btbd7	ZDB-GENE-030131-4477	protein_coding	ensembl_havana_gene	ENSDART00000149024.2	ENSDART00000020710^ENSDART00000149024
ENSDARG00000003077		NNN	0.620325	0.740131	0.620325	0.661635		ENSDARG00000003077.10	si:ch73-111m19.2	ZDB-GENE-130603-13	CH73-111M19.2	—	protein_coding	ensembl_havana_gene	ENSDART00000152850.3	ENSDART00000016553^ENSDART00000152850^ENSDART00000153047
ENSDARG00000003081		NNN	0.381991	0.956864	0.381991	0.785836		ENSDARG00000003081.9	myosin binding protein Hb	ZDB-GENE-030131-9794	CH73-181D11.1	ZDB-GENE-030131-9794	protein_coding	ensembl_havana_gene	ENSDART00000183742.1	ENSDART00000026359^ENSDART00000122794^ENSDART00000157584^ENSDART00000158845^ENSDART00000164232^ENSDART00000172526^ENSDART00000183742
ENSDARG00000003084		NNN	0.999832	0.999832	0.999994	0.99996		ENSDARG00000003084.10	spire-type actin nucleation factor 2	ZDB-GENE-041114-29	spire2	ZDB-GENE-041114-29	protein_coding	ensembl_havana_gene	ENSDART00000035245.8	ENSDART00000012287^ENSDART00000035245^ENSDART00000136226^ENSDART00000182506^ENSDART00000183561
ENSDARG00000003085		SNN	0.0471635	0.999982	0.0471635	0.876522		ENSDARG00000003085.11	STAM binding protein-like 1	ZDB-GENE-100215-4	stambpl1	ZDB-GENE-100215-4	protein_coding	ensembl_havana_gene	ENSDART00000106035.5	ENSDART00000106035^ENSDART00000152478
ENSDARG00000003087		NBB	0.501069	0.501069	0.964373	0.997873		ENSDARG00000003087.4	UBX domain protein 6	ZDB-GENE-030131-5680	CH211-129C21.4	ZDB-GENE-030131-5680	protein_coding	ensembl_havana_gene	ENSDART00000017755.4	ENSDART00000017755
ENSDARG00000003090		NNN	0.0394307	0.553007	0.182444	0.0394307		ENSDARG00000003090.7	odorant receptor, family C, subfamily 103, member 4	ZDB-GENE-000329-12	or103-4	ZDB-GENE-000329-12	protein_coding	ensembl_havana_gene	ENSDART00000019701.5	ENSDART00000019701^ENSDART00000143003
ENSDARG00000003091		SPP	1	1	1	1		ENSDARG00000003091.11	occludin b	ZDB-GENE-041212-43	CH211-214J8.4	—	protein_coding	ensembl_havana_gene	ENSDART00000134432.3	ENSDART00000098514^ENSDART00000134432^ENSDART00000145417^ENSDART00000193816
ENSDARG00000003098		NNN	0.98073	0.98073	0.999996	1		ENSDARG00000003098.10	lysine (K)-specific demethylase 5Bb	ZDB-GENE-030424-1	kdm5bb	ZDB-GENE-030424-1	protein_coding	ensembl_havana_gene	ENSDART00000005583.9	ENSDART00000005583^ENSDART00000108508^ENSDART00000148765^ENSDART00000149173^ENSDART00000150113
ENSDARG00000003109		NGN	0.0291656	0.259199	0.375617	0.0291656		ENSDARG00000003109.10	regulator of calcineurin 1a	ZDB-GENE-040801-135	DKEY-67C22.1	ZDB-GENE-040801-135	protein_coding	ensembl_havana_gene	ENSDART00000020638.8	ENSDART00000020638^ENSDART00000134447^ENSDART00000138963^ENSDART00000144141
ENSDARG00000003113		NNB	0.0754147	0.0754147	0.0832	0.995334		ENSDARG00000003113.8	adenosine deaminase	ZDB-GENE-040718-393	ada	ZDB-GENE-040718-393	protein_coding	ensembl_havana_gene	ENSDART00000019519.8	ENSDART00000019519
ENSDARG00000003127		NNN	0.999805	0.999805	0.999999	1		ENSDARG00000003127.12	zgc:123105	ZDB-GENE-051113-272	DKEYP-72G9.2	ZDB-GENE-051113-272	protein_coding	ensembl_havana_gene	ENSDART00000186354.1	ENSDART00000007675^ENSDART00000133099^ENSDART00000147318^ENSDART00000186354
ENSDARG00000003132		NNG	0.0379176	0.584966	0.0379176	0.512366		ENSDARG00000003132.10	APAF1 interacting protein	ZDB-GENE-040912-128	apip	ZDB-GENE-040912-128	polymorphic_pseudogene	ensembl_havana_gene	ENSDART00000007487.9	ENSDART00000007487
ENSDARG00000003142		NNN	0.999502	0.999502	1	1		ENSDARG00000003142.9	dachshund c	ZDB-GENE-020402-5	dachc	ZDB-GENE-020402-5	protein_coding	ensembl_havana_gene	ENSDART00000018827.9	ENSDART00000018827^ENSDART00000124561^ENSDART00000135617
ENSDARG00000003144		NNN	0.192168	0.649813	0.192168	0.356413		ENSDARG00000003144.7	peroxisomal membrane protein 2	ZDB-GENE-040912-184	DKEY-72N1.1	—	protein_coding	ensembl_havana_gene	ENSDART00000026516.7	ENSDART00000026516^ENSDART00000138049
ENSDARG00000003146		NNN	0.98671	0.98671	0.999946	1		ENSDARG00000003146.10	si:dkey-27m7.4	ZDB-GENE-090313-297	DKEY-27M7.4	—	protein_coding	ensembl_havana_gene	ENSDART00000057913.6	ENSDART00000057913^ENSDART00000145438
ENSDARG00000003151		NNN	0.742493	0.976469	0.742493	0.962509		ENSDARG00000003151.10	S-phase kinase-associated protein 1	ZDB-GENE-040426-1707	skp1	ZDB-GENE-040426-1707	protein_coding	ensembl_havana_gene	ENSDART00000008454.8	ENSDART00000008454^ENSDART00000188017
ENSDARG00000003153		NNN	0.960326	0.960326	0.998898	0.997446		ENSDARG00000003153.8	nudix hydrolase 21	ZDB-GENE-040426-1316	cpsf5	BX088710.3;ZDB-GENE-040426-1316	protein_coding	ensembl_havana_gene	ENSDART00000023721.8	ENSDART00000023721
ENSDARG00000003157		NNN	0.990794	0.990794	0.999662	0.998973		ENSDARG00000003157.9	nuclear factor of kappa light polypeptide gene enhancer in B-cells inhibitor-like 1	ZDB-GENE-040116-7	—	—	protein_coding	ensembl	ENSDART00000059017.4	ENSDART00000059017
ENSDARG00000003165		NGG	0.0739752	0.0739752	0.443275	0.753679		ENSDARG00000003165.13	nuclear receptor subfamily 2, group F, member 6b	ZDB-GENE-040426-2351	nr2f6	ZDB-GENE-040426-2351	protein_coding	ensembl_havana_gene	ENSDART00000027666.11	ENSDART00000027666^ENSDART00000159680^ENSDART00000161458^ENSDART00000165031^ENSDART00000176170
ENSDARG00000003167		NNN	0.683905	0.800891	0.683905	0.707924		ENSDARG00000003167.9	MTOR associated protein, LST8 homolog (S. cerevisiae)	ZDB-GENE-030131-6176	CH73-34A14.2	ZDB-GENE-030131-6176	protein_coding	ensembl_havana_gene	ENSDART00000148326.3	ENSDART00000012743^ENSDART00000131995^ENSDART00000134530^ENSDART00000148326^ENSDART00000162900^ENSDART00000178845^ENSDART00000185149
ENSDARG00000003169		NNN	0.706123	0.706123	0.963868	0.998248		ENSDARG00000003169.11	membrane associated guanylate kinase, WW and PDZ domain containing 1b	ZDB-GENE-030131-5110	magi1	ZDB-GENE-030131-5110	protein_coding	ensembl_havana_gene	ENSDART00000103969.6	ENSDART00000044423^ENSDART00000103968^ENSDART00000103969^ENSDART00000158123^ENSDART00000163006^ENSDART00000164294^ENSDART00000171766^ENSDART00000176141
ENSDARG00000003175		NGG	0.248583	0.248583	0.459606	0.785377		ENSDARG00000003175.10	syntaxin 5A, like	ZDB-GENE-030131-1825	stx5al	ZDB-GENE-030131-1825	protein_coding	ensembl_havana_gene	ENSDART00000146315.3	ENSDART00000021121^ENSDART00000146315
ENSDARG00000003181		NGP	0.0501883	0.0968868	0.0501883	0.999579		ENSDARG00000003181.9	sulfotransferase family 1, cytosolic sulfotransferase 4	ZDB-GENE-040426-2054	sult1st4	ZDB-GENE-040426-2054	protein_coding	ensembl_havana_gene	ENSDART00000030557.8	ENSDART00000030557^ENSDART00000145333
ENSDARG00000003189		NNN	0.583775	0.963793	0.745592	0.583775		ENSDARG00000003189.11	proteasome 26S subunit, non-ATPase 1	ZDB-GENE-040426-810	DKEY-254A11.2	ZDB-GENE-040426-810	protein_coding	ensembl_havana_gene	ENSDART00000193346.1	ENSDART00000007346^ENSDART00000133030^ENSDART00000144100^ENSDART00000159016^ENSDART00000193346
ENSDARG00000003193		NGG	0.0287825	0.0287825	0.122491	0.341111		ENSDARG00000003193.9	Ras association (RalGDS/AF-6) domain family (N-terminal) member 7b	ZDB-GENE-030429-1	rassf7b	ZDB-GENE-030429-1	protein_coding	ensembl_havana_gene	ENSDART00000025451.7	ENSDART00000025451^ENSDART00000131210^ENSDART00000137059^ENSDART00000141934^ENSDART00000144878^ENSDART00000176372^ENSDART00000192172
ENSDARG00000003197		NNN	0.0839324	0.494249	0.384972	0.0839324		ENSDARG00000003197.10	WD repeat domain 21	ZDB-GENE-040109-2	—	—	protein_coding	ensembl	ENSDART00000024088.10	ENSDART00000024088
ENSDARG00000003200		NNN	0.9936	0.997498	0.999906	0.9936		ENSDARG00000003200.8	forkhead box M1	ZDB-GENE-040426-1275	foxm1	ZDB-GENE-040426-1275	protein_coding	ensembl_havana_gene	ENSDART00000008898.8	ENSDART00000008898^ENSDART00000162390^ENSDART00000165354^ENSDART00000166232
ENSDARG00000003203		SPP	0.999842	0.999842	0.99997	1		ENSDARG00000003203.9	Rh family, C glycoprotein a	ZDB-GENE-070424-81	rhcg	ZDB-GENE-070424-81	protein_coding	ensembl_havana_gene	ENSDART00000053521.7	ENSDART00000053521^ENSDART00000149046
ENSDARG00000003205		NGG	0.250257	0.250257	0.819315	0.730925		ENSDARG00000003205.7	N-glycanase 1	ZDB-GENE-050522-535	ngly1	ZDB-GENE-050522-535	protein_coding	ensembl_havana_gene	ENSDART00000019206.6	ENSDART00000019206
ENSDARG00000003206		NNN	0.995643	0.999998	0.995643	0.999958		ENSDARG00000003206.12	coiled-coil-helix-coiled-coil-helix domain containing 6a	ZDB-GENE-040930-2	CH211-207E14.3	ZDB-GENE-040930-2	protein_coding	ensembl_havana_gene	ENSDART00000143933.3	ENSDART00000123925^ENSDART00000138142^ENSDART00000140977^ENSDART00000143339^ENSDART00000143933^ENSDART00000176139
ENSDARG00000003207		NNN	0.990595	0.999614	0.990595	0.999993		ENSDARG00000003207.8	mitochondrial transcription termination factor 3	ZDB-GENE-040718-359	mterfd1	ZDB-GENE-040718-359	protein_coding	ensembl_havana_gene	ENSDART00000006338.8	ENSDART00000006338^ENSDART00000151541^ENSDART00000151574
ENSDARG00000003208		NNN	0.698666	0.698666	0.951022	0.938179		ENSDARG00000003208.8	protein-O-mannose kinase	ZDB-GENE-041114-119	pomk	ZDB-GENE-041114-119	protein_coding	ensembl_havana_gene	ENSDART00000122695.3	ENSDART00000122695
ENSDARG00000003210		NNN	0.985404	0.985404	0.999677	1		ENSDARG00000003210.10	si:ch73-86n2.1	ZDB-GENE-091204-400	CH73-86N2.1	—	protein_coding	ensembl_havana_gene	ENSDART00000141493.2	ENSDART00000022998^ENSDART00000141493
ENSDARG00000003213		NNN	0.183802	0.989311	0.183802	0.360653		ENSDARG00000003213.10	N(alpha)-acetyltransferase 15, NatA auxiliary subunit a	ZDB-GENE-030131-2392	narg1a	ZDB-GENE-030131-2392	protein_coding	ensembl_havana_gene	ENSDART00000124417.4	ENSDART00000017785^ENSDART00000124417
ENSDARG00000003216		SGG	0.625986	1	0.632406	0.625986		ENSDARG00000003216.7	annexin A2a	ZDB-GENE-030131-4282	anxa2a	ZDB-GENE-030131-4282	protein_coding	ensembl_havana_gene	ENSDART00000011967.7	ENSDART00000011967^ENSDART00000182856
ENSDARG00000003217		NNN	0.0578837	1	0.362787	0.0578837		ENSDARG00000003217.12	URB2 ribosome biogenesis 2 homolog (S. cerevisiae)	ZDB-GENE-030131-2621	DKEY-162B3.2	—	protein_coding	ensembl_havana_gene	ENSDART00000138747.3	ENSDART00000138747^ENSDART00000146524^ENSDART00000176800
ENSDARG00000003219		NNN	0.352978	0.993589	0.999362	0.352978		ENSDARG00000003219.8	bridging integrator 2a	ZDB-GENE-041114-126	bin2	ZDB-GENE-041114-126	protein_coding	ensembl_havana_gene	ENSDART00000025196.8	ENSDART00000025196^ENSDART00000146504^ENSDART00000147549^ENSDART00000162772^ENSDART00000187641
ENSDARG00000003229		NNG	0.181009	0.800443	0.348203	0.181009		ENSDARG00000003229.9	growth differentiation factor 9	ZDB-GENE-050221-7	gdf9	ZDB-GENE-050221-7	protein_coding	ensembl_havana_gene	ENSDART00000019296.9	ENSDART00000019296
ENSDARG00000003235		NNN	0.986435	0.999241	0.986435	0.999988		ENSDARG00000003235.8	nucleoporin 88	ZDB-GENE-050522-297	nup88	ZDB-GENE-050522-297	protein_coding	ensembl_havana_gene	ENSDART00000023123.8	ENSDART00000023123
ENSDARG00000003244		NBB	0.989828	0.989828	0.999963	0.999958		ENSDARG00000003244.11	guanylate binding protein 3	ZDB-GENE-070912-176	CH211-195H23.5	—	protein_coding	ensembl_havana_gene	ENSDART00000143885.3	ENSDART00000007074^ENSDART00000143885
ENSDARG00000003250		NNN	0.999333	0.999333	0.999964	0.999989		ENSDARG00000003250.10	phosphatidylinositol-4,5-bisphosphate 3-kinase, catalytic subunit delta	ZDB-GENE-040426-1128	—	—	protein_coding	ensembl	ENSDART00000006120.10	ENSDART00000006120
ENSDARG00000003251		NNN	0.97942	0.97942	1	1		ENSDARG00000003251.11	zinc finger and BTB domain containing 22b	ZDB-GENE-010110-4	zbtb22b	ZDB-GENE-010110-4	protein_coding	ensembl_havana_gene	ENSDART00000110366.6	ENSDART00000110366
ENSDARG00000003257		NNN	0.946178	0.946178	0.999896	0.999993		ENSDARG00000003257.8	zgc:101559	ZDB-GENE-041114-122	CH211-221B16.3	ZDB-GENE-041114-122	protein_coding	ensembl_havana_gene	ENSDART00000006256.8	ENSDART00000006256
ENSDARG00000003259		NNN	0.95278	0.95278	0.982435	0.990369		ENSDARG00000003259.11	lysyl oxidase a	ZDB-GENE-040426-2398	lox	ZDB-GENE-040426-2398	protein_coding	ensembl_havana_gene	ENSDART00000125407.4	ENSDART00000016317^ENSDART00000114373^ENSDART00000125407
ENSDARG00000003269		NNN	0.456037	0.456037	0.87168	0.987207		ENSDARG00000003269.13	chloride channel 3	ZDB-GENE-030131-1699	clcn3	ZDB-GENE-030131-1699	protein_coding	ensembl_havana_gene	ENSDART00000172848.2	ENSDART00000049311^ENSDART00000172848^ENSDART00000172859^ENSDART00000172934^ENSDART00000173018
ENSDARG00000003270		NNN	0.220856	0.999892	0.220856	0.554799		ENSDARG00000003270.12	deoxyhypusine synthase	ZDB-GENE-040426-2001	dhps	ZDB-GENE-040426-2001	protein_coding	ensembl_havana_gene	ENSDART00000074068.8	ENSDART00000074068^ENSDART00000126455^ENSDART00000166913^ENSDART00000182596
ENSDARG00000003281		NNN	0.845895	0.999163	0.845895	0.943731		ENSDARG00000003281.7	phosphoinositide-3-kinase interacting protein 1	ZDB-GENE-031030-14	CH211-225B11.3	ZDB-GENE-031030-14	protein_coding	ensembl_havana_gene	ENSDART00000134697.2	ENSDART00000134697
ENSDARG00000003287		NNN	0.200027	0.999949	0.200027	0.605404		ENSDARG00000003287.7	WD repeat domain 12	ZDB-GENE-030131-371	wdr12	—	protein_coding	ensembl_havana_gene	ENSDART00000012903.7	ENSDART00000012903
ENSDARG00000003290		NNN	0.999806	0.999806	0.999998	1		ENSDARG00000003290.12	Dab, reelin signal transducer, homolog 1b (Drosophila)	ZDB-GENE-060421-7958	—	—	protein_coding	ensembl	ENSDART00000167202.2	ENSDART00000082155^ENSDART00000108481^ENSDART00000111272^ENSDART00000167202
ENSDARG00000003293		NNN	0.691104	0.998209	0.988281	0.691104		ENSDARG00000003293.11	SRY (sex determining region Y)-box 9a	ZDB-GENE-001103-1	sox9a	ZDB-GENE-001103-1	protein_coding	ensembl_havana_gene	ENSDART00000005676.6	ENSDART00000005676^ENSDART00000127937
ENSDARG00000003303		NNN	0.515476	0.989036	0.515476	0.833093		ENSDARG00000003303.8	stanniocalcin 1	ZDB-GENE-060825-79	CH211-67O1.3	ZDB-GENE-060825-79	protein_coding	ensembl_havana_gene	ENSDART00000025008.8	ENSDART00000025008
ENSDARG00000003307		NNN	0.679981	0.875909	0.679981	0.947171		ENSDARG00000003307.12	syntaxin 16	ZDB-GENE-060810-113	stx16	ZDB-GENE-060810-113	protein_coding	ensembl_havana_gene	ENSDART00000154738.2	ENSDART00000154738^ENSDART00000155934^ENSDART00000190452
ENSDARG00000003308		NNN	0.711071	0.942184	0.711071	0.974184		ENSDARG00000003308.10	ER membrane protein complex subunit 2	ZDB-GENE-040625-82	ttc35	ZDB-GENE-040625-82	protein_coding	ensembl_havana_gene	ENSDART00000023238.10	ENSDART00000023238
ENSDARG00000003311		NNN	0.999949	0.999949	1	1		ENSDARG00000003311.11	pantothenate kinase 2	ZDB-GENE-070112-1952	CH211-1M7.1	ZDB-GENE-070112-1952	protein_coding	ensembl_havana_gene	ENSDART00000133041.2	ENSDART00000133041^ENSDART00000139308
ENSDARG00000003313		SGG	0.12004	0.984668	0.12004	0.362716		ENSDARG00000003313.11	si:ch73-70c5.1	ZDB-GENE-050506-143	CH73-70C5.1	ZDB-GENE-050506-143	protein_coding	havana	ENSDART00000155735.3	ENSDART00000154135^ENSDART00000154214^ENSDART00000155735
ENSDARG00000003320		NNN	0.273288	0.273288	0.555096	0.959711		ENSDARG00000003320.10	family with sequence similarity 91, member A1	ZDB-GENE-040426-1187	fam91a1	ZDB-GENE-040426-1187	protein_coding	ensembl_havana_gene	ENSDART00000019459.10	ENSDART00000019459^ENSDART00000180317
ENSDARG00000003326		NNN	0.538779	0.538779	0.788352	0.999992		ENSDARG00000003326.11	calcium channel, voltage-dependent, gamma subunit 5a	ZDB-GENE-120104-4	—	—	protein_coding	ensembl	ENSDART00000017774.10	ENSDART00000017774
ENSDARG00000003328		NNN	0.118599	0.464874	0.167626	0.118599		ENSDARG00000003328.11	SMC5-SMC6 complex localization factor 2	ZDB-GENE-081107-61	DKEY-19P15.9	—	protein_coding	havana	ENSDART00000136689.3	ENSDART00000136689^ENSDART00000138362
ENSDARG00000003344		NNN	0.203317	0.848689	0.58002	0.203317		ENSDARG00000003344.9	transient receptor potential cation channel, subfamily C, member 2b	ZDB-GENE-050712-3	trpc2	ZDB-GENE-050712-3	protein_coding	ensembl_havana_gene	ENSDART00000050172.7	ENSDART00000050172
ENSDARG00000003373		NNN	0.156179	0.991519	0.249766	0.156179		ENSDARG00000003373.7	COMM domain containing 2	ZDB-GENE-040718-118	commd2	ZDB-GENE-040718-118	protein_coding	ensembl_havana_gene	ENSDART00000012212.7	ENSDART00000012212
ENSDARG00000003375		NBG	0.0346149	0.199377	0.992467	0.0346149		ENSDARG00000003375.10	guanine nucleotide binding protein (G protein), gamma 12a	ZDB-GENE-040426-2555	gng12a	ZDB-GENE-040426-2555	protein_coding	ensembl_havana_gene	ENSDART00000149584.3	ENSDART00000149584^ENSDART00000150166
ENSDARG00000003380		NNN	0.760948	0.937218	0.770742	0.760948		ENSDARG00000003380.8	si:dkey-275b16.2	ZDB-GENE-090312-204	DKEY-275B16.2	—	protein_coding	ensembl_havana_gene	ENSDART00000012457.7	ENSDART00000012457^ENSDART00000131466^ENSDART00000143260
ENSDARG00000003381		NBG	0.036838	0.201036	0.996124	0.036838		ENSDARG00000003381.9	si:ch211-266g18.6	ZDB-GENE-131121-599	CH211-266G18.6	—	protein_coding	havana	ENSDART00000052439.7	ENSDART00000052439^ENSDART00000156623
ENSDARG00000003382		NNN	0.94728	0.979245	0.94728	0.975425		ENSDARG00000003382.9	CWC25 spliceosome-associated protein homolog (S. cerevisiae)	ZDB-GENE-040426-2817	cwc25	ZDB-GENE-040426-2817	protein_coding	ensembl_havana_gene	ENSDART00000100924.5	ENSDART00000100924
ENSDARG00000003383		NNN	0.903131	0.903131	0.999456	0.999844		ENSDARG00000003383.11	ankyrin repeat and SOCS box containing 8	ZDB-GENE-030131-5411	asb8	ZDB-GENE-030131-5411	protein_coding	ensembl_havana_gene	ENSDART00000013797.9	ENSDART00000013797^ENSDART00000137229^ENSDART00000145007^ENSDART00000188394
ENSDARG00000003395		SBB	0.999542	1	0.999542	0.999996		ENSDARG00000003395.12	collagen, type IV, alpha 3	ZDB-GENE-070802-4	DKEY-29L4.2	—	protein_coding	ensembl_havana_gene	ENSDART00000156697.3	ENSDART00000049849^ENSDART00000156697^ENSDART00000184099
ENSDARG00000003398		NNN	0.0832821	0.863062	0.40267	0.0832821		ENSDARG00000003398.11	recombination signal binding protein for immunoglobulin kappa J region a	ZDB-GENE-031117-1	—	—	protein_coding	ensembl	ENSDART00000005067.10	ENSDART00000005067
ENSDARG00000003399		NNG	0.0591285	0.999421	0.0591285	0.727365		ENSDARG00000003399.7	fibroblast growth factor 8a	ZDB-GENE-990415-72	fgf8	ZDB-GENE-990415-72	protein_coding	ensembl_havana_gene	ENSDART00000025583.7	ENSDART00000025583^ENSDART00000144968
ENSDARG00000003403		SNN	0.995041	0.995041	0.999707	0.999997		ENSDARG00000003403.11	teneurin transmembrane protein 1	ZDB-GENE-060531-26	CH211-1C4.1	—	protein_coding	ensembl_havana_gene	ENSDART00000040184.7	ENSDART00000040184^ENSDART00000144198^ENSDART00000176793
ENSDARG00000003411		NNN	0.0817618	1	0.956385	0.0817618		ENSDARG00000003411.8	forkhead box A2	ZDB-GENE-980526-404	foxa2	—	protein_coding	ensembl_havana_gene	ENSDART00000014296.7	ENSDART00000014296
ENSDARG00000003414		NNN	0.1646	0.95898	0.606783	0.1646		ENSDARG00000003414.10	calcyphosine-like b	ZDB-GENE-050417-298	CH73-112L6.3	—	protein_coding	ensembl_havana_gene	ENSDART00000133190.2	ENSDART00000133190
ENSDARG00000003420		NNN	0.424361	0.424361	0.995236	1		ENSDARG00000003420.11	cholinergic receptor, nicotinic, alpha 5	ZDB-GENE-050417-440	CH73-235D11.2	ZDB-GENE-050417-440	protein_coding	ensembl_havana_gene	ENSDART00000021372.6	ENSDART00000021372^ENSDART00000185249
ENSDARG00000003421		NNN	0.356397	0.779998	0.47282	0.356397		ENSDARG00000003421.11	insulin-like growth factor 2 mRNA binding protein 2a	ZDB-GENE-070912-44	CH211-125M20.1	—	protein_coding	ensembl_havana_gene	ENSDART00000128931.3	ENSDART00000102419^ENSDART00000128931^ENSDART00000180832^ENSDART00000182695^ENSDART00000191372^ENSDART00000193667
ENSDARG00000003429		NNN	0.764656	0.94579	0.764656	0.990524		ENSDARG00000003429.9	heterogeneous nuclear ribonucleoprotein D-like	ZDB-GENE-040426-2717	hnrpdl	ZDB-GENE-040426-2717	protein_coding	ensembl_havana_gene	ENSDART00000020631.9	ENSDART00000020631^ENSDART00000132284^ENSDART00000137853^ENSDART00000146539^ENSDART00000148277^ENSDART00000189017
ENSDARG00000003444		NNN	0.134768	0.974505	0.355258	0.134768		ENSDARG00000003444.7	dehydrogenase/reductase (SDR family) member 7	ZDB-GENE-060825-21	DKEY-15F17.6	ZDB-GENE-060825-21	protein_coding	ensembl_havana_gene	ENSDART00000005670.7	ENSDART00000005670
ENSDARG00000003446		SGG	0.786761	1	0.940917	0.786761		ENSDARG00000003446.9	inositol 1,3,4,5,6-pentakisphosphate 2-kinase	ZDB-GENE-050327-41	ippk	ZDB-GENE-050327-41	protein_coding	ensembl_havana_gene	ENSDART00000131217.3	ENSDART00000131217
ENSDARG00000003449		NNN	0.999885	0.999999	0.999885	0.999988		ENSDARG00000003449.10	phosphodiesterase 10A	ZDB-GENE-040426-1115	CH211-278M12.1	ZDB-GENE-040426-1115	protein_coding	ensembl_havana_gene	ENSDART00000007500.6	ENSDART00000007500^ENSDART00000144312^ENSDART00000161684
ENSDARG00000003462		NNN	0.684915	0.999999	0.973202	0.684915		ENSDARG00000003462.12	ferrochelatase	ZDB-GENE-000928-1	fech	ZDB-GENE-000928-1	protein_coding	ensembl_havana_gene	ENSDART00000148540.2	ENSDART00000148540
ENSDARG00000003469		NNN	0.768168	0.768168	0.999557	0.999999		ENSDARG00000003469.8	neuronal differentiation 4	ZDB-GENE-030730-1	neurod4	ZDB-GENE-030730-1	protein_coding	ensembl_havana_gene	ENSDART00000145072.2	ENSDART00000145072
ENSDARG00000003475		NPP	0.939716	0.939716	0.99997	0.999538		ENSDARG00000003475.11	sulfotransferase family 1, cytosolic sulfotransferase 5	ZDB-GENE-050809-2	sult1st5	ZDB-GENE-050809-2	protein_coding	ensembl_havana_gene	ENSDART00000046933.9	ENSDART00000046933^ENSDART00000135559^ENSDART00000146231
ENSDARG00000003486		NNN	0.220841	0.936755	0.481101	0.220841		ENSDARG00000003486.7	protein phosphatase 1, catalytic subunit, alpha isozyme a	ZDB-GENE-040516-3	DKEY-105I19.2	ZDB-GENE-040516-3	protein_coding	ensembl_havana_gene	ENSDART00000025046.7	ENSDART00000025046
ENSDARG00000003487		NNN	0.993286	0.999703	0.993286	0.999383		ENSDARG00000003487.10	nucleoporin 93	ZDB-GENE-990415-46	dye	ZDB-GENE-990415-46	protein_coding	ensembl_havana_gene	ENSDART00000025782.9	ENSDART00000025782^ENSDART00000144960^ENSDART00000147839^ENSDART00000179783
ENSDARG00000003495		NNN	0.991735	0.991735	1	1		ENSDARG00000003495.12	MAP-kinase activating death domain	ZDB-GENE-030131-8076	madd	ZDB-GENE-030131-8076	protein_coding	ensembl_havana_gene	ENSDART00000173673.2	ENSDART00000047208^ENSDART00000173454^ENSDART00000173526^ENSDART00000173605^ENSDART00000173673^ENSDART00000173816^ENSDART00000173988^ENSDART00000174546
ENSDARG00000003512		SNN	0.12245	0.999997	0.12245	0.377149		ENSDARG00000003512.10	ankyrin repeat and sterile alpha motif domain containing 1B	ZDB-GENE-041210-349	CH211-211O1.2	—	protein_coding	ensembl_havana_gene	ENSDART00000133509.3	ENSDART00000133509^ENSDART00000140682^ENSDART00000143656^ENSDART00000144956^ENSDART00000169704
ENSDARG00000003517		NPN	0.0263442	0.307715	0.975594	0.0263442		ENSDARG00000003517.6	inositol monophosphatase 1	ZDB-GENE-040718-245	impa1	ZDB-GENE-040718-245	protein_coding	ensembl_havana_gene	ENSDART00000010683.6	ENSDART00000010683^ENSDART00000131411^ENSDART00000137933
ENSDARG00000003519		NNN	0.207152	0.971339	0.207152	0.239196		ENSDARG00000003519.10	adenine phosphoribosyltransferase	ZDB-GENE-040426-1492	aprt	ZDB-GENE-040426-1492	protein_coding	ensembl_havana_gene	ENSDART00000148514.3	ENSDART00000013796^ENSDART00000148514^ENSDART00000168721
ENSDARG00000003520		NNN	0.0271527	0.573739	0.155991	0.0271527		ENSDARG00000003520.12	TBC1 domain family, member 14	ZDB-GENE-030131-6136	tbc1d14	ZDB-GENE-030131-6136	protein_coding	ensembl_havana_gene	ENSDART00000133420.4	ENSDART00000040946^ENSDART00000133420^ENSDART00000144993^ENSDART00000186825^ENSDART00000189682
ENSDARG00000003523		NNN	0.86063	0.86063	0.926893	0.999979		ENSDARG00000003523.11	intelectin 3	ZDB-GENE-090527-4	itln3	ZDB-GENE-090527-4	protein_coding	ensembl_havana_gene	ENSDART00000003040.11	ENSDART00000003040^ENSDART00000165193^ENSDART00000171669
ENSDARG00000003526		NNN	0.124614	0.984795	0.124614	0.133268		ENSDARG00000003526.7	proteasome subunit alpha 5	ZDB-GENE-040625-96	psma5	—	protein_coding	ensembl_havana_gene	ENSDART00000020655.7	ENSDART00000020655^ENSDART00000141477^ENSDART00000146495
ENSDARG00000003527		NNN	0.0344226	0.99996	0.0344226	0.367297		ENSDARG00000003527.11	MAK16 homolog (S. cerevisiae)	ZDB-GENE-020419-35	mak16	ZDB-GENE-020419-35	protein_coding	ensembl_havana_gene	ENSDART00000113837.5	ENSDART00000113837^ENSDART00000148676^ENSDART00000149904
ENSDARG00000003531		NNN	0.99003	0.99003	0.998007	0.999984		ENSDARG00000003531.13	transcription elongation factor A (SII), 1	ZDB-GENE-030131-8049	tcea1	—	protein_coding	ensembl_havana_gene	ENSDART00000101861.6	ENSDART00000101861^ENSDART00000186387
ENSDARG00000003533		SNN	0.901178	0.999715	0.964191	0.901178		ENSDARG00000003533.9	collagen, type VIII, alpha 1b	ZDB-GENE-060503-140	CH73-162I18.4	—	protein_coding	ensembl_havana_gene	ENSDART00000154717.3	ENSDART00000019846^ENSDART00000154717^ENSDART00000182377
ENSDARG00000003544		NNN	0.990755	0.990755	1	1		ENSDARG00000003544.9	adenosine deaminase, RNA-specific, B1b	ZDB-GENE-030219-15	CH211-268B13.2	—	protein_coding	ensembl_havana_gene	ENSDART00000145616.2	ENSDART00000145616^ENSDART00000185579^ENSDART00000193087
ENSDARG00000003553		NNN	0.0433272	0.446249	0.0433272	0.992908		ENSDARG00000003553.9	gonadotropin releasing hormone receptor 2	ZDB-GENE-090128-3	gnrhr2	ZDB-GENE-090128-3	protein_coding	ensembl_havana_gene	ENSDART00000006795.9	ENSDART00000006795
ENSDARG00000003564		NNN	0.115039	0.999659	0.115039	0.33044		ENSDARG00000003564.5	deoxyhypusine hydroxylase/monooxygenase	ZDB-GENE-030131-451	dohh	—	protein_coding	ensembl_havana_gene	ENSDART00000018515.5	ENSDART00000018515
ENSDARG00000003570		NNN	0.624664	0.624664	0.92284	0.954223		ENSDARG00000003570.8	heat shock protein 90, beta (grp94), member 1	ZDB-GENE-031002-1	hsp90b1	ZDB-GENE-031002-1	protein_coding	ensembl_havana_gene	ENSDART00000004879.6	ENSDART00000004879
ENSDARG00000003573		NNN	0.691677	0.691677	0.910466	0.992886		ENSDARG00000003573.7	dynactin 5	ZDB-GENE-040718-201	DKEY-18H21.3	ZDB-GENE-040718-201	protein_coding	ensembl_havana_gene	ENSDART00000010944.7	ENSDART00000010944
ENSDARG00000003576		NNN	0.0553079	0.946326	0.0553079	0.896657		ENSDARG00000003576.7	kelch-like family member 32	ZDB-GENE-070209-47	DKEY-220M7.1	ZDB-GENE-070209-47	protein_coding	ensembl_havana_gene	ENSDART00000017562.7	ENSDART00000017562^ENSDART00000143873
ENSDARG00000003584		NGG	0.0577525	0.32741	0.181824	0.0577525		ENSDARG00000003584.9	phospholipase A2, group VII (platelet-activating factor acetylhydrolase, plasma)	ZDB-GENE-040426-2248	pla2g7	ZDB-GENE-040426-2248	protein_coding	ensembl_havana_gene	ENSDART00000016090.7	ENSDART00000016090^ENSDART00000152993^ENSDART00000153402
ENSDARG00000003592		NNN	0.0470583	0.939285	0.0470583	0.256447		ENSDARG00000003592.9	surfeit 1	ZDB-GENE-041108-2	CH73-278C20.3	ZDB-GENE-070112-1342	protein_coding	ensembl_havana_gene	ENSDART00000011337.8	ENSDART00000011337^ENSDART00000135533^ENSDART00000146223
ENSDARG00000003599		NNN	0.0434017	0.967783	0.0749213	0.0434017		ENSDARG00000003599.10	ribosomal protein L3	ZDB-GENE-030131-1291	rpl3	—	protein_coding	ensembl_havana_gene	ENSDART00000011251.10	ENSDART00000011251^ENSDART00000138327^ENSDART00000147048^ENSDART00000186457
ENSDARG00000003607		NNN	0.854286	0.854286	0.986436	0.981089		ENSDARG00000003607.9	nuclear receptor subfamily 2, group F, member 6a	ZDB-GENE-030131-4362	nr2f6a	ZDB-GENE-030131-4362	protein_coding	ensembl_havana_gene	ENSDART00000022379.9	ENSDART00000022379^ENSDART00000133818^ENSDART00000135323
ENSDARG00000003615		NNN	0.949241	0.966183	0.973825	0.949241		ENSDARG00000003615.11	solute carrier family 26 (anion exchanger), member 3, tandem duplicate 2	ZDB-GENE-041210-179	DKEY-31F5.1	—	protein_coding	ensembl_havana_gene	ENSDART00000101043.5	ENSDART00000101043^ENSDART00000138662
ENSDARG00000003616		NNN	0.721597	0.721597	0.99894	0.988087		ENSDARG00000003616.12	ariadne ubiquitin-conjugating enzyme E2 binding protein homolog 1 (Drosophila)	ZDB-GENE-030131-5213	arih1	ZDB-GENE-030131-5213	protein_coding	ensembl_havana_gene	ENSDART00000019581.11	ENSDART00000019581
ENSDARG00000003631		NNN	0.974913	0.974913	0.999491	0.999749		ENSDARG00000003631.10	clock circadian regulator b	ZDB-GENE-030408-2	clock3	ZDB-GENE-030408-2	protein_coding	ensembl_havana_gene	ENSDART00000133959.3	ENSDART00000012552^ENSDART00000133758^ENSDART00000133959^ENSDART00000136307^ENSDART00000144403
ENSDARG00000003632		NNN	0.740285	0.740285	0.905556	0.947258		ENSDARG00000003632.6	zgc:172270	ZDB-GENE-080204-67	CH211-213O11.12	ZDB-GENE-080204-67	protein_coding	ensembl_havana_gene	ENSDART00000023323.6	ENSDART00000023323
ENSDARG00000003635		SGG	0.199968	0.999745	0.361225	0.199968		ENSDARG00000003635.10	monoacylglycerol O-acyltransferase 3b	ZDB-GENE-110302-2	CH211-271E10.5	—	protein_coding	ensembl_havana_gene	ENSDART00000015136.10	ENSDART00000015136
ENSDARG00000003641		NGN	0.0620865	0.103897	0.897345	0.0620865		ENSDARG00000003641.9	trk-fused gene	ZDB-GENE-030131-8410	tfg	—	protein_coding	ensembl_havana_gene	ENSDART00000013591.9	ENSDART00000013591^ENSDART00000112398
ENSDARG00000003642		NNN	0.783564	0.811045	0.857619	0.783564		ENSDARG00000003642.8	zinc finger, FYVE domain containing 19	ZDB-GENE-040718-109	—	—	protein_coding	ensembl	ENSDART00000013093.8	ENSDART00000013093
ENSDARG00000003655		NNN	0.999999	0.999999	1	1		ENSDARG00000003655.11	transmembrane protein 59-like	ZDB-GENE-040426-2651	tmem59l	ZDB-GENE-040426-2651	protein_coding	ensembl_havana_gene	ENSDART00000027345.10	ENSDART00000027345
ENSDARG00000003675		NPG	0.0422894	0.681042	0.9984	0.0422894		ENSDARG00000003675.13	crystallin, lambda 1	ZDB-GENE-060810-7	DKEY-51D17.5	ZDB-GENE-060818-44	protein_coding	ensembl_havana_gene	ENSDART00000180081.1	ENSDART00000062656^ENSDART00000130023^ENSDART00000180081
ENSDARG00000003680		NNN	1	1	1	1		ENSDARG00000003680.12	runt-related transcription factor 1; translocated to, 1 (cyclin D-related)	ZDB-GENE-060929-164	runx1t1	ZDB-GENE-060929-164	protein_coding	ensembl_havana_gene	ENSDART00000147226.4	ENSDART00000010294^ENSDART00000123270^ENSDART00000147226^ENSDART00000151192^ENSDART00000151521^ENSDART00000162517^ENSDART00000183477
ENSDARG00000003681		NNN	0.686952	0.999809	0.867298	0.686952		ENSDARG00000003681.10	eukaryotic translation initiation factor 5	ZDB-GENE-030131-975	eif5	ZDB-GENE-030131-975	protein_coding	ensembl_havana_gene	ENSDART00000019476.9	ENSDART00000019476^ENSDART00000134333^ENSDART00000137766^ENSDART00000152332^ENSDART00000152342^ENSDART00000152533^ENSDART00000181188^ENSDART00000185605^ENSDART00000191070
ENSDARG00000003684		NNN	0.497796	0.999296	0.497796	0.628785		ENSDARG00000003684.10	obscurin-like 1a	ZDB-GENE-060503-649	—	—	protein_coding	ensembl	ENSDART00000137136.2	ENSDART00000137136
ENSDARG00000003693		NNN	0.757136	0.999993	0.757136	0.945758		ENSDARG00000003693.10	histidyl-tRNA synthetase	ZDB-GENE-040912-152	CH211-235C4.2	ZDB-GENE-040912-152	protein_coding	ensembl_havana_gene	ENSDART00000141471.3	ENSDART00000141471^ENSDART00000142158
ENSDARG00000003695		NNN	0.502019	0.502019	0.54919	0.946111		ENSDARG00000003695.12	voltage-dependent anion channel 3	ZDB-GENE-040426-2380	CH211-220D9.2	ZDB-GENE-040426-2380	protein_coding	ensembl_havana_gene	ENSDART00000134044.3	ENSDART00000134044^ENSDART00000137262^ENSDART00000144017
ENSDARG00000003697		NNN	0.335105	0.979652	0.956216	0.335105		ENSDARG00000003697.11	solute carrier family 5 (iodide transporter), member 8-like	ZDB-GENE-061110-98	slc5a8l	ZDB-GENE-061110-98	protein_coding	ensembl_havana_gene	ENSDART00000032982.8	ENSDART00000032982^ENSDART00000135185
ENSDARG00000003699		NNN	0.275878	0.658518	0.399205	0.275878		ENSDARG00000003699.12	ATPase copper transporting alpha	ZDB-GENE-060825-45	atp7a	ZDB-GENE-060825-45	protein_coding	ensembl_havana_gene	ENSDART00000054977.6	ENSDART00000054977^ENSDART00000124072^ENSDART00000185239
ENSDARG00000003701		NNN	1	1	1	1		ENSDARG00000003701.9	claudin g	ZDB-GENE-010328-7	cldng	ZDB-GENE-010328-7	protein_coding	ensembl_havana_gene	ENSDART00000015547.9	ENSDART00000015547^ENSDART00000142111^ENSDART00000192758
ENSDARG00000003705		NNN	0.99918	0.99918	1	1		ENSDARG00000003705.10	prion protein, related sequence 3	ZDB-GENE-041221-3	prnprs3	ZDB-GENE-041221-3	protein_coding	ensembl_havana_gene	ENSDART00000154348.2	ENSDART00000154348
ENSDARG00000003706		NNG	0.0598049	1	0.0598049	0.43804		ENSDARG00000003706.10	ryanodine receptor 2b (cardiac)	ZDB-GENE-061226-3	ryr2b	ZDB-GENE-061226-3	protein_coding	ensembl_havana_gene	ENSDART00000165606.2	ENSDART00000149737^ENSDART00000165606
ENSDARG00000003732		NNN	0.245193	0.995843	0.553884	0.245193		ENSDARG00000003732.11	microphthalmia-associated transcription factor a	ZDB-GENE-990910-11	mitfa	—	protein_coding	ensembl_havana_gene	ENSDART00000056457.5	ENSDART00000056457^ENSDART00000122793^ENSDART00000143374
ENSDARG00000003749		NNN	0.996143	0.996143	0.999999	1		ENSDARG00000003749.10	polymerase (DNA directed), beta	ZDB-GENE-040830-1	polb	ZDB-GENE-040830-1	protein_coding	ensembl_havana_gene	ENSDART00000002764.9	ENSDART00000002764^ENSDART00000133938^ENSDART00000140900
ENSDARG00000003750		NNN	0.0824882	0.994341	0.0824882	0.0887235		ENSDARG00000003750.11	phosphoribosylformylglycinamidine synthase	ZDB-GENE-030131-4420	pfas	ZDB-GENE-030131-4420	protein_coding	ensembl_havana_gene	ENSDART00000012581.8	ENSDART00000012581^ENSDART00000153071
ENSDARG00000003751		NPP	0.14899	0.14899	0.999076	0.994958		ENSDARG00000003751.12	large tumor suppressor kinase 1	ZDB-GENE-050523-2	lats1	ZDB-GENE-050523-2	protein_coding	ensembl_havana_gene	ENSDART00000027119.9	ENSDART00000027119^ENSDART00000109321^ENSDART00000189866
ENSDARG00000003754		NNN	0.903202	0.999991	0.903202	0.927147		ENSDARG00000003754.10	tetraspanin 2a	ZDB-GENE-050522-511	CH211-105J21.5	ZDB-GENE-050522-511	protein_coding	ensembl_havana_gene	ENSDART00000041942.8	ENSDART00000041942^ENSDART00000143241
ENSDARG00000003757		NPG	0.167957	0.378305	0.995973	0.167957		ENSDARG00000003757.8	canopy1	ZDB-GENE-060315-3	cnpy1	ZDB-GENE-060315-3	protein_coding	ensembl_havana_gene	ENSDART00000020792.6	ENSDART00000020792^ENSDART00000146968^ENSDART00000163350
ENSDARG00000003769		NNN	0.995721	0.995721	0.999998	1		ENSDARG00000003769.8	transcriptional adaptor 2B	ZDB-GENE-050522-557	tada2b	ZDB-GENE-050522-557	protein_coding	ensembl_havana_gene	ENSDART00000004365.8	ENSDART00000004365
ENSDARG00000003776		NNN	0.78637	0.78637	0.946444	0.999452		ENSDARG00000003776.10	phosphatidylinositol-5-phosphate 4-kinase, type II, alpha a	ZDB-GENE-080721-18	DKEY-113P2.1	—	protein_coding	ensembl_havana_gene	ENSDART00000014787.10	ENSDART00000014787^ENSDART00000191137
ENSDARG00000003779		NNN	0.999895	0.999895	1	1		ENSDARG00000003779.13	catenin (cadherin-associated protein), delta 2b	ZDB-GENE-070912-532	DKEY-40C17.4	—	protein_coding	ensembl_havana_gene	ENSDART00000090292.7	ENSDART00000087270^ENSDART00000090292^ENSDART00000142500^ENSDART00000145405
ENSDARG00000003789		NNN	0.895241	0.895241	0.999998	1		ENSDARG00000003789.12	DENN/MADD domain containing 5B	ZDB-GENE-030131-2248	CH211-11C20.2	—	protein_coding	ensembl_havana_gene	ENSDART00000140510.3	ENSDART00000033053^ENSDART00000079461^ENSDART00000133837^ENSDART00000140510^ENSDART00000141119
ENSDARG00000003795		NNN	0.973735	0.998061	0.99631	0.973735		ENSDARG00000003795.9	isocitrate dehydrogenase 2 (NADP+), mitochondrial	ZDB-GENE-031118-95	—	—	protein_coding	ensembl	ENSDART00000004692.9	ENSDART00000004692
ENSDARG00000003797		NNN	0.191578	0.803542	0.191578	0.571893		ENSDARG00000003797.11	ankyrin repeat and SOCS box containing 2a, tandem duplicate 1	ZDB-GENE-030131-5355	asb2a	ZDB-GENE-030131-5355	protein_coding	ensembl_havana_gene	ENSDART00000148361.4	ENSDART00000026088^ENSDART00000148361^ENSDART00000153184^ENSDART00000153448
ENSDARG00000003803		NNN	0.522979	0.522979	0.986254	1		ENSDARG00000003803.9	LIM homeobox 3	HGNC:6595	—	—	protein_coding	ensembl	ENSDART00000124939.3	ENSDART00000097164^ENSDART00000124939
ENSDARG00000003808		SBB	0.998725	1	0.999453	0.998725		ENSDARG00000003808.5	aquaporin 3a	ZDB-GENE-040426-2826	aqp3a	ZDB-GENE-040426-2826	protein_coding	ensembl_havana_gene	ENSDART00000009182.5	ENSDART00000009182
ENSDARG00000003811		SGG	0.558992	0.993327	0.558992	0.75973		ENSDARG00000003811.10	plexin b2a	ZDB-GENE-030131-8917	DKEY-261E22.2	—	protein_coding	ensembl_havana_gene	ENSDART00000159447.2	ENSDART00000048821^ENSDART00000143773^ENSDART00000159447^ENSDART00000182093
ENSDARG00000003818		NNN	0.247404	0.851684	0.247404	0.283159		ENSDARG00000003818.9	protein kinase, AMP-activated, gamma 1 non-catalytic subunit	ZDB-GENE-040426-2188	prkag1	ZDB-GENE-040426-2188	protein_coding	ensembl_havana_gene	ENSDART00000022179.9	ENSDART00000022179
ENSDARG00000003820		SNN	0.045731	0.999804	0.045731	0.980873		ENSDARG00000003820.11	nuclear receptor subfamily 1, group D, member 2a	ZDB-GENE-040504-1	nr1d2a	ZDB-GENE-040504-1	protein_coding	ensembl_havana_gene	ENSDART00000153675.3	ENSDART00000128167^ENSDART00000148588^ENSDART00000153675
ENSDARG00000003822		NNN	0.720131	0.940376	0.951886	0.720131		ENSDARG00000003822.8	ankyrin repeat domain 16	ZDB-GENE-041210-253	ankrd16	DKEY-108D22.7;ZDB-GENE-041210-253	protein_coding	ensembl_havana_gene	ENSDART00000037600.7	ENSDART00000037600^ENSDART00000131541^ENSDART00000147424
ENSDARG00000003827		NGG	0.190335	0.998097	0.282315	0.190335		ENSDARG00000003827.7	small nuclear RNA activating complex, polypeptide 1b	ZDB-GENE-040426-716	DKEY-188I13.4	ZDB-GENE-040426-716	protein_coding	ensembl_havana_gene	ENSDART00000003888.7	ENSDART00000003888^ENSDART00000134318^ENSDART00000135467
ENSDARG00000003829		NNN	0.0511811	0.0606495	0.0511811	0.300774		ENSDARG00000003829.11	UDP-N-acetyl-alpha-D-galactosamine:polypeptide N-acetylgalactosaminyltransferase 2	ZDB-GENE-041111-110	DKEY-162B3.1	—	protein_coding	ensembl_havana_gene	ENSDART00000136217.2	ENSDART00000136217
ENSDARG00000003835		NNN	0.58693	0.58693	0.997796	0.990441		ENSDARG00000003835.10	stomatin	ZDB-GENE-980526-486	stom	ZDB-GENE-980526-486	protein_coding	ensembl_havana_gene	ENSDART00000141326.2	ENSDART00000005750^ENSDART00000141326^ENSDART00000163238^ENSDART00000191700
ENSDARG00000003841		NNN	0.208455	0.79357	0.208455	0.245422		ENSDARG00000003841.11	U6 snRNA biogenesis 1	ZDB-GENE-040801-197	CH211-172L8.1	ZDB-GENE-040801-197	protein_coding	ensembl_havana_gene	ENSDART00000007029.9	ENSDART00000007029
ENSDARG00000003845		NNN	0.870144	0.870144	0.9577	0.997688		ENSDARG00000003845.9	choroideremia (Rab escort protein 1)	ZDB-GENE-030318-2	chm	ZDB-GENE-030318-2	protein_coding	ensembl_havana_gene	ENSDART00000005479.9	ENSDART00000005479
ENSDARG00000003846		NNN	0.888165	0.987351	0.888165	0.911684		ENSDARG00000003846.10	mitochondrial ribosomal protein L21	ZDB-GENE-061027-183	—	—	protein_coding	ensembl	ENSDART00000162933.2	ENSDART00000162933
ENSDARG00000003854		SBB	0.985481	0.985481	0.99914	0.98784		ENSDARG00000003854.9	acyl-CoA synthetase long chain family member 1b	ZDB-GENE-040801-88	acsl1b	ZDB-GENE-040801-88	protein_coding	ensembl_havana_gene	ENSDART00000130801.3	ENSDART00000010773^ENSDART00000130801
ENSDARG00000003860		NNN	0.999271	0.999271	0.999844	0.999997		ENSDARG00000003860.11	chromobox homolog 3a (HP1 gamma homolog, Drosophila)	ZDB-GENE-030131-1158	—	—	protein_coding	ensembl	ENSDART00000012352.10	ENSDART00000012352^ENSDART00000186609
ENSDARG00000003865		NGN	0.0229487	0.343182	0.531045	0.0229487		ENSDARG00000003865.9	par-6 partitioning defective 6 homolog beta (C. elegans)	ZDB-GENE-090312-133	DKEY-192I18.6	—	protein_coding	ensembl_havana_gene	ENSDART00000016901.8	ENSDART00000016901
ENSDARG00000003866		NGN	0.0632257	0.0632257	0.480352	0.0651889		ENSDARG00000003866.6	transmembrane 9 superfamily member 2	ZDB-GENE-030131-6302	tm9sf2	ZDB-GENE-030131-6302	protein_coding	ensembl_havana_gene	ENSDART00000019743.6	ENSDART00000019743^ENSDART00000135873
ENSDARG00000003867		NNN	0.999045	0.999045	0.999909	0.999999		ENSDARG00000003867.9	cyclin-dependent kinase 20	ZDB-GENE-041212-84	DKEYP-77F7.1	DKEYP-77F7.1-001	protein_coding	ensembl_havana_gene	ENSDART00000140098.2	ENSDART00000140098^ENSDART00000148339^ENSDART00000176938
ENSDARG00000003869		NNN	0.0413526	0.969228	0.0413526	0.0677614		ENSDARG00000003869.8	2,4-dienoyl CoA reductase 1, mitochondrial	ZDB-GENE-040718-142	DKEY-202M9.1	ZDB-GENE-040718-142	protein_coding	ensembl_havana_gene	ENSDART00000139069.2	ENSDART00000134441^ENSDART00000139069^ENSDART00000147812
ENSDARG00000003872		NNN	0.874923	0.993794	0.980944	0.874923		ENSDARG00000003872.11	coiled-coil domain containing 102A	ZDB-GENE-030131-4044	ccdc102a	ZDB-GENE-030131-4044	protein_coding	ensembl_havana_gene	ENSDART00000011324.9	ENSDART00000011324^ENSDART00000173947
ENSDARG00000003877		NNN	0.99942	0.99942	1	1		ENSDARG00000003877.9	polybromo 1	ZDB-GENE-080926-4	pbrm1	ZDB-GENE-080926-4	protein_coding	ensembl_havana_gene	ENSDART00000045971.7	ENSDART00000045971^ENSDART00000159683^ENSDART00000182041
ENSDARG00000003899		NGG	0.200617	0.200617	0.795156	0.659109		ENSDARG00000003899.9	zinc finger, DHHC-type containing 23b	ZDB-GENE-040808-13	zdhhc23b	ZDB-GENE-040808-13	protein_coding	ensembl_havana_gene	ENSDART00000010126.9	ENSDART00000010126
ENSDARG00000003900		NGG	0.0203146	0.0203146	0.383503	0.487194		ENSDARG00000003900.7	si:dkeyp-111e5.4	ZDB-GENE-131127-443	DKEYP-111E5.4	—	protein_coding	havana	ENSDART00000155174.2	ENSDART00000155174
ENSDARG00000003902		NGG	0.0860638	0.0860638	0.160776	0.125529		ENSDARG00000003902.9	cathepsin L.1	ZDB-GENE-040718-61	ctsl.1	ZDB-GENE-040718-61	protein_coding	ensembl_havana_gene	ENSDART00000017756.9	ENSDART00000017756^ENSDART00000155591^ENSDART00000156158^ENSDART00000180178^ENSDART00000181461
ENSDARG00000003903		NNN	0.43749	0.687295	0.43749	0.617948		ENSDARG00000003903.10	hyaluronan and proteoglycan link protein 2	ZDB-GENE-030131-8089	DKEY-235H8.3	—	protein_coding	ensembl_havana_gene	ENSDART00000087149.6	ENSDART00000087149
ENSDARG00000003904		SGG	0.145513	0.999999	0.145513	0.809509		ENSDARG00000003904.9	synaptonemal complex protein 1	ZDB-GENE-040910-6	sycp1	ZDB-GENE-040910-6	protein_coding	ensembl_havana_gene	ENSDART00000011876.8	ENSDART00000011876^ENSDART00000124524
ENSDARG00000003909		NNN	0.641022	0.969396	0.641022	0.998184		ENSDARG00000003909.11	finTRIM family, member 1	ZDB-GENE-070705-491	DKEY-72L21.6	ZDB-GENE-060512-201	protein_coding	ensembl_havana_gene	ENSDART00000100524.5	ENSDART00000100524
ENSDARG00000003910		NNN	0.885483	0.885483	0.979029	0.993116		ENSDARG00000003910.11	mediator complex subunit 13b	ZDB-GENE-030131-3529	med13b	ZDB-GENE-030131-3529	protein_coding	ensembl_havana_gene	ENSDART00000152355.2	ENSDART00000152355^ENSDART00000152358
ENSDARG00000003920		NNN	0.852345	0.998683	0.852345	0.976151		ENSDARG00000003920.8	SET nuclear proto-oncogene b	ZDB-GENE-030131-433	setb	ZDB-GENE-030131-433	protein_coding	ensembl_havana_gene	ENSDART00000023834.7	ENSDART00000023834^ENSDART00000190943
ENSDARG00000003925		SPP	0.998613	0.998613	0.999817	0.999986		ENSDARG00000003925.6	connexin 28.6	ZDB-GENE-040406-4	cx28.6	ZDB-GENE-040406-4	protein_coding	ensembl_havana_gene	ENSDART00000012889.6	ENSDART00000012889
ENSDARG00000003927		NGG	0.350097	0.952703	0.350097	0.677646		ENSDARG00000003927.8	claudin 12	ZDB-GENE-010328-14	cldn12	ZDB-GENE-010328-14	protein_coding	ensembl_havana_gene	ENSDART00000025877.8	ENSDART00000025877
ENSDARG00000003931		NNN	0.0793363	1	0.0969403	0.0793363		ENSDARG00000003931.9	carnosine dipeptidase 2	ZDB-GENE-030131-5499	cndp2	ZDB-GENE-030131-5499	protein_coding	ensembl_havana_gene	ENSDART00000038202.6	ENSDART00000038202^ENSDART00000143457
ENSDARG00000003934		NNN	0.0827856	0.639615	0.0827856	0.132912		ENSDARG00000003934.7	nucleoredoxin like 2	ZDB-GENE-041212-55	—	—	protein_coding	ensembl	ENSDART00000016103.7	ENSDART00000016103
ENSDARG00000003938		NNN	0.665264	0.999989	0.787759	0.665264		ENSDARG00000003938.9	replication protein A1	ZDB-GENE-030912-3	rpa1	ZDB-GENE-030912-3	protein_coding	ensembl_havana_gene	ENSDART00000032880.6	ENSDART00000032880
ENSDARG00000003940		NNN	0.995615	0.995615	0.999998	1		ENSDARG00000003940.11	mitochondrial fission regulator 1-like	ZDB-GENE-030131-6228	fam54b	ZDB-GENE-030131-6228	protein_coding	ensembl_havana_gene	ENSDART00000007271.8	ENSDART00000007271^ENSDART00000138356^ENSDART00000144556
ENSDARG00000003941		NGG	0.0387289	0.999758	0.0387289	0.373962		ENSDARG00000003941.9	RRS1 ribosome biogenesis regulator homolog (S. cerevisiae)	ZDB-GENE-030131-9345	rrs1	ZDB-GENE-030131-9345	protein_coding	ensembl_havana_gene	ENSDART00000125190.3	ENSDART00000125190
ENSDARG00000003944		NNG	0.0212969	0.721955	0.0212969	0.115692		ENSDARG00000003944.8	neuromedin U receptor 1b	ZDB-GENE-131121-154	DKEY-185P13.2	—	protein_coding	ensembl_havana_gene	ENSDART00000017787.7	ENSDART00000017787
ENSDARG00000003952		NGG	0.134466	0.155704	0.134466	0.240786		ENSDARG00000003952.12	profilin 2	ZDB-GENE-040115-4	pfn2	ZDB-GENE-040115-4	protein_coding	ensembl_havana_gene	ENSDART00000104687.8	ENSDART00000104687^ENSDART00000164443
ENSDARG00000003961		SPP	0.986933	0.996605	0.995496	0.986933		ENSDARG00000003961.8	poly (ADP-ribose) polymerase family, member 3	ZDB-GENE-030131-7435	parp3	—	protein_coding	ensembl_havana_gene	ENSDART00000022949.8	ENSDART00000022949
ENSDARG00000003963		NNN	0.900944	0.900944	0.980926	0.996655		ENSDARG00000003963.9	tnf receptor-associated factor 4a	ZDB-GENE-040308-1	traf4a	ZDB-GENE-040308-1	protein_coding	ensembl_havana_gene	ENSDART00000016024.9	ENSDART00000016024
ENSDARG00000003965		SNN	0.0645129	0.999999	0.430193	0.0645129		ENSDARG00000003965.4	T cell leukemia homeobox 1	ZDB-GENE-021021-2	tlx1	ZDB-GENE-021021-2	protein_coding	ensembl_havana_gene	ENSDART00000006393.4	ENSDART00000006393
ENSDARG00000003968		NGN	0.135561	0.959785	0.289277	0.135561		ENSDARG00000003968.8	La ribonucleoprotein domain family, member 6b	ZDB-GENE-041008-244	CH73-204M7.1	ZDB-GENE-041008-244	protein_coding	ensembl_havana_gene	ENSDART00000004483.8	ENSDART00000004483^ENSDART00000134957^ENSDART00000137879
ENSDARG00000003970		NNN	0.381222	0.535041	0.381222	0.418829		ENSDARG00000003970.11	tripartite motif containing 35-13	ZDB-GENE-110920-5	CH211-241F5.4	—	protein_coding	ensembl_havana_gene	ENSDART00000154365.2	ENSDART00000154365
ENSDARG00000003971		NNN	0.0539996	0.0539996	0.999997	1		ENSDARG00000003971.9	ISL LIM homeobox 2a	ZDB-GENE-980526-562	—	—	protein_coding	ensembl	ENSDART00000012862.9	ENSDART00000012862
ENSDARG00000003973		NNN	0.0979763	0.984928	0.333655	0.0979763		ENSDARG00000003973.11	cysteine and histidine-rich domain (CHORD) containing 1a	ZDB-GENE-050626-79	CH1073-257B5.1	ZDB-GENE-050626-79	protein_coding	ensembl_havana_gene	ENSDART00000041249.9	ENSDART00000041249
ENSDARG00000003974		NNN	0.995887	0.995887	0.999714	0.999758		ENSDARG00000003974.11	speckle-type POZ protein-like b	ZDB-GENE-061103-277	spoplb	ZDB-GENE-061103-277	protein_coding	ensembl_havana_gene	ENSDART00000109418.5	ENSDART00000015021^ENSDART00000109418
ENSDARG00000003977		NGG	0.423701	0.486065	0.435373	0.423701		ENSDARG00000003977.12	zgc:153896	ZDB-GENE-060825-119	CH211-225L4.2	ZDB-GENE-060825-119	protein_coding	ensembl_havana_gene	ENSDART00000018519.10	ENSDART00000018519
ENSDARG00000003984		NNN	0.066066	0.819473	0.066066	0.0856333		ENSDARG00000003984.10	si:dkey-175g6.5	ZDB-GENE-091204-127	DKEY-175G6.5	—	protein_coding	ensembl_havana_gene	ENSDART00000022170.9	ENSDART00000022170^ENSDART00000135890
ENSDARG00000003989		NNN	0.40707	0.40707	0.877345	0.955758		ENSDARG00000003989.11	corticotropin releasing hormone receptor 1	ZDB-GENE-081231-1	crhr1	ZDB-GENE-081231-1	protein_coding	ensembl_havana_gene	ENSDART00000156527.2	ENSDART00000156527
ENSDARG00000003991		NNN	0.0908035	0.999089	0.975963	0.0908035		ENSDARG00000003991.8	four and a half LIM domains 2b	ZDB-GENE-041010-121	CH211-147G19.1	ZDB-GENE-041010-121	protein_coding	ensembl_havana_gene	ENSDART00000124132.3	ENSDART00000124132^ENSDART00000138078^ENSDART00000185327^ENSDART00000187713
ENSDARG00000003994		NNN	0.910063	0.910063	1	1		ENSDARG00000003994.9	synaptotagmin IXa	ZDB-GENE-031002-18	—	—	protein_coding	ensembl	ENSDART00000018685.9	ENSDART00000018685
ENSDARG00000003998		NNN	0.964677	0.964677	0.99991	1		ENSDARG00000003998.10	phytanoyl-CoA 2-hydroxylase interacting protein-like a	ZDB-GENE-061215-64	phyhipla	ZDB-GENE-061215-64	protein_coding	ensembl_havana_gene	ENSDART00000006676.10	ENSDART00000006676^ENSDART00000126075
ENSDARG00000004015		NNN	0.998977	0.999987	0.998977	1		ENSDARG00000004015.13	adenylate cyclase activating polypeptide 1a	ZDB-GENE-020809-4	adcyap1a	ZDB-GENE-020809-4	protein_coding	ensembl_havana_gene	ENSDART00000012070.8	ENSDART00000012070^ENSDART00000180869
ENSDARG00000004017		NGN	0.0229367	0.0229367	0.247941	0.149226		ENSDARG00000004017.10	sperm associated antigen 1a	ZDB-GENE-030131-9443	—	—	protein_coding	ensembl	ENSDART00000185960.1	ENSDART00000130537^ENSDART00000185960
ENSDARG00000004018		NBB	0.978571	0.978571	1	0.999973		ENSDARG00000004018.8	si:ch211-236h17.3	ZDB-GENE-030131-738	CH211-236H17.2	—	protein_coding	ensembl_havana_gene	ENSDART00000013449.8	ENSDART00000013449
ENSDARG00000004023		NNN	0.984779	0.984779	1	1		ENSDARG00000004023.6	ISL LIM homeobox 1	ZDB-GENE-980526-112	isl1	ZDB-GENE-980526-112	protein_coding	ensembl_havana_gene	ENSDART00000010896.6	ENSDART00000010896
ENSDARG00000004034		SGG	0.3556	1	0.511945	0.3556		ENSDARG00000004034.9	Rho GDP dissociation inhibitor (GDI) gamma	ZDB-GENE-040426-1493	arhgdig	ZDB-GENE-040426-1493	protein_coding	ensembl_havana_gene	ENSDART00000019004.9	ENSDART00000019004^ENSDART00000132761
ENSDARG00000004037		NGN	0.0569868	0.0569868	0.367291	0.38238		ENSDARG00000004037.7	component of oligomeric golgi complex 2	ZDB-GENE-040426-2671	CH211-8A9.2	—	protein_coding	ensembl_havana_gene	ENSDART00000026189.7	ENSDART00000026189
ENSDARG00000004046		NNN	0.997755	0.999994	0.997755	0.999441		ENSDARG00000004046.8	PHD finger protein 6	ZDB-GENE-030131-5278	phf6	ZDB-GENE-030131-5278	protein_coding	ensembl_havana_gene	ENSDART00000006463.7	ENSDART00000006463^ENSDART00000138341^ENSDART00000170683^ENSDART00000172945^ENSDART00000173281
ENSDARG00000004049		NNN	0.975303	0.975303	1	1		ENSDARG00000004049.11	myristoylated alanine-rich protein kinase C substrate a	ZDB-GENE-050522-145	marcksa	ZDB-GENE-050522-145	protein_coding	ensembl_havana_gene	ENSDART00000123096.5	ENSDART00000123096^ENSDART00000186743
ENSDARG00000004051		NNN	0.569671	0.569671	0.843233	0.98804		ENSDARG00000004051.10	—	—	—	—	protein_coding	ensembl	ENSDART00000012822.9	ENSDART00000012822
ENSDARG00000004055		NPN	0.0217444	0.35559	0.998419	0.0217444		ENSDARG00000004055.10	UHRF1 binding protein 1-like	ZDB-GENE-041210-177	DKEYP-90A8.1	—	protein_coding	ensembl_havana_gene	ENSDART00000135330.2	ENSDART00000046871^ENSDART00000135330^ENSDART00000179075
ENSDARG00000004059		SGG	0.098873	0.982608	0.098873	0.165454		ENSDARG00000004059.11	galactokinase 2	ZDB-GENE-041114-143	galk2	ZDB-GENE-041114-143	protein_coding	ensembl_havana_gene	ENSDART00000012600.11	ENSDART00000012600
ENSDARG00000004060		SPP	0.988573	0.988573	0.999303	0.994474		ENSDARG00000004060.8	basic helix-loop-helix family, member e40	ZDB-GENE-030131-3133	bhlhb2	—	protein_coding	ensembl_havana_gene	ENSDART00000026017.6	ENSDART00000026017
ENSDARG00000004074		NNN	0.76927	0.76927	1	1		ENSDARG00000004074.8	BTB and CNC homology 1, basic leucine zipper transcription factor 2b	ZDB-GENE-041001-139	bach2b	ZDB-GENE-041001-139	protein_coding	ensembl_havana_gene	ENSDART00000131857.3	ENSDART00000131857^ENSDART00000135292^ENSDART00000153464^ENSDART00000183346
ENSDARG00000004078		NNN	0.999772	0.999772	1	0.999998		ENSDARG00000004078.8	acyl-CoA synthetase long chain family member 4a	ZDB-GENE-040426-1565	acsl4	ZDB-GENE-040426-1565	protein_coding	ensembl_havana_gene	ENSDART00000006489.8	ENSDART00000006489^ENSDART00000186495
ENSDARG00000004082		NNN	0.287144	0.999993	0.287144	0.346705		ENSDARG00000004082.7	connexin 39.9	ZDB-GENE-040406-2	cx39.9	ZDB-GENE-040406-2	protein_coding	ensembl_havana_gene	ENSDART00000125161.3	ENSDART00000013745^ENSDART00000125161
ENSDARG00000004094		SNN	0.437472	0.997291	0.437472	0.778559		ENSDARG00000004094.12	acyl-CoA synthetase bubblegum family member 2	ZDB-GENE-030131-7099	DKEY-240A9.3	ZDB-GENE-030131-7099	protein_coding	ensembl_havana_gene	ENSDART00000124809.4	ENSDART00000012120^ENSDART00000124809
ENSDARG00000004105		NNN	0.986677	0.999825	0.986677	0.993392		ENSDARG00000004105.10	tyrosine kinase with immunoglobulin-like and EGF-like domains 1	ZDB-GENE-990415-55	tie1	ZDB-GENE-990415-55	protein_coding	ensembl_havana_gene	ENSDART00000192502.1	ENSDART00000003701^ENSDART00000184003^ENSDART00000190702^ENSDART00000191183^ENSDART00000192502
ENSDARG00000004109		NNN	0.0672354	0.549024	0.0672354	0.0967884		ENSDARG00000004109.9	—	—	—	—	protein_coding	ensembl	ENSDART00000067781.7	ENSDART00000067781
ENSDARG00000004111		NNN	0.250026	0.250026	0.66794	0.978924		ENSDARG00000004111.11	estrogen receptor 1	ZDB-GENE-020806-5	esr1	ZDB-GENE-020806-5	protein_coding	ensembl_havana_gene	ENSDART00000087844.7	ENSDART00000024518^ENSDART00000087844^ENSDART00000166190^ENSDART00000192966
ENSDARG00000004114		NNN	0.994968	0.999148	0.99996	0.994968		ENSDARG00000004114.8	TELO2 interacting protein 1	ZDB-GENE-080819-3	RP71-80O10.2	—	protein_coding	ensembl_havana_gene	ENSDART00000022498.7	ENSDART00000022498
ENSDARG00000004115		NNN	0.920558	0.920558	0.933799	0.990786		ENSDARG00000004115.8	mannosyl (alpha-1,3-)-glycoprotein beta-1,4-N-acetylglucosaminyltransferase, isozyme B	ZDB-GENE-040704-19	mgat4b	ZDB-GENE-040704-19	protein_coding	ensembl_havana_gene	ENSDART00000001159.11	ENSDART00000001159
ENSDARG00000004130		NNN	0.76543	0.961665	0.76543	0.863638		ENSDARG00000004130.8	mevalonate kinase	ZDB-GENE-041114-37	mvk	ZDB-GENE-041114-37	protein_coding	ensembl_havana_gene	ENSDART00000006673.8	ENSDART00000006673
ENSDARG00000004131		NNN	0.183114	0.979154	0.42739	0.183114		ENSDARG00000004131.13	rotatin	ZDB-GENE-090609-5	DKEY-172H9.1	—	protein_coding	ensembl_havana_gene	ENSDART00000183176.1	ENSDART00000006930^ENSDART00000142473^ENSDART00000145978^ENSDART00000183176
ENSDARG00000004132		NNN	0.937236	0.937236	0.974727	0.965242		ENSDARG00000004132.12	ubiquitin specific peptidase 19	ZDB-GENE-030131-3055	DKEY-32E6.9	DKEY-32E6.2	protein_coding	ensembl_havana_gene	ENSDART00000147778.2	ENSDART00000112840^ENSDART00000132025^ENSDART00000147778^ENSDART00000189562
ENSDARG00000004141		NGN	0.0243957	0.656235	0.479756	0.0243957		ENSDARG00000004141.11	zgc:92630	ZDB-GENE-040718-449	DKEY-81N5.4	ZDB-GENE-040718-449	protein_coding	ensembl_havana_gene	ENSDART00000127436.3	ENSDART00000127436
ENSDARG00000004150		NNN	0.995967	0.995967	0.999956	1		ENSDARG00000004150.11	glutamate receptor, metabotropic 2a	ZDB-GENE-030131-8097	DKEYP-111E5.5	—	protein_coding	ensembl_havana_gene	ENSDART00000085472.6	ENSDART00000085472^ENSDART00000154304^ENSDART00000181772
ENSDARG00000004151		NNN	0.580868	0.924796	0.580868	0.877882		ENSDARG00000004151.9	RAB23, member RAS oncogene family	ZDB-GENE-050522-328	rab23	ZDB-GENE-050522-328	protein_coding	ensembl_havana_gene	ENSDART00000019983.9	ENSDART00000019983
ENSDARG00000004154		NNN	0.601494	0.97141	0.601494	0.701892		ENSDARG00000004154.7	ORAI calcium release-activated calcium modulator 1b	ZDB-GENE-050522-100	orai1	ZDB-GENE-050522-100	protein_coding	ensembl_havana_gene	ENSDART00000009227.6	ENSDART00000009227
ENSDARG00000004158		NNN	0.913884	0.913884	0.999519	0.999984		ENSDARG00000004158.11	transmembrane protein 63C	ZDB-GENE-120928-2	DKEY-120L3.1	NP_001153308.1	protein_coding	ensembl_havana_gene	ENSDART00000156260.3	ENSDART00000074802^ENSDART00000154711^ENSDART00000155096^ENSDART00000156260
ENSDARG00000004160		NGG	0.0754148	0.0754148	0.667597	0.634583		ENSDARG00000004160.10	receptor accessory protein 3b	ZDB-GENE-040426-730	reep3	ZDB-GENE-040426-730	protein_coding	ensembl_havana_gene	ENSDART00000021628.9	ENSDART00000021628
ENSDARG00000004161		NNN	0.920718	0.97356	0.920718	0.988486		ENSDARG00000004161.9	IK cytokine	ZDB-GENE-030131-960	—	—	protein_coding	ensembl	ENSDART00000012396.9	ENSDART00000012396^ENSDART00000181266
ENSDARG00000004167		NNN	0.244853	0.446815	0.244853	0.331717		ENSDARG00000004167.8	zgc:110366	ZDB-GENE-050417-302	DKEY-60B12.2	—	protein_coding	ensembl_havana_gene	ENSDART00000153404.3	ENSDART00000012119^ENSDART00000131589^ENSDART00000153404
ENSDARG00000004169		NBB	0.99999	0.99999	0.999993	1		ENSDARG00000004169.12	stathmin 1a	ZDB-GENE-031006-14	stmn1a	ZDB-GENE-031006-14	protein_coding	ensembl_havana_gene	ENSDART00000007906.11	ENSDART00000007906^ENSDART00000132662^ENSDART00000151228^ENSDART00000164683
ENSDARG00000004171		SPP	0.990882	0.990882	1	0.998853		ENSDARG00000004171.10	Rab acceptor 1 (prenylated)	ZDB-GENE-040625-146	rabac1	ZDB-GENE-040625-146	protein_coding	ensembl_havana_gene	ENSDART00000036891.8	ENSDART00000036891^ENSDART00000049148^ENSDART00000188503
ENSDARG00000004173		NGN	0.0542631	0.148059	0.444165	0.0542631		ENSDARG00000004173.13	coatomer protein complex, subunit alpha	ZDB-GENE-020905-2	copa	—	protein_coding	ensembl_havana_gene	ENSDART00000048277.8	ENSDART00000048277^ENSDART00000111382^ENSDART00000136159^ENSDART00000138874^ENSDART00000176827
ENSDARG00000004174		NNN	0.982408	0.982408	0.997877	0.995352		ENSDARG00000004174.10	CCR4-NOT transcription complex, subunit 1	ZDB-GENE-040915-1	cnot1	ZDB-GENE-040915-1	protein_coding	ensembl_havana_gene	ENSDART00000125459.4	ENSDART00000125459^ENSDART00000141311^ENSDART00000144339^ENSDART00000148321
ENSDARG00000004176		NNN	0.726122	0.997438	0.835936	0.726122		ENSDARG00000004176.12	unc-51 like kinase 4	ZDB-GENE-100922-243	CH211-101B18.1	—	protein_coding	ensembl_havana_gene	ENSDART00000180930.1	ENSDART00000060519^ENSDART00000143540^ENSDART00000162229^ENSDART00000167393^ENSDART00000180930
ENSDARG00000004177		SPP	0.997623	0.997623	1	1		ENSDARG00000004177.11	family with sequence similarity 169, member Ab	ZDB-GENE-091118-95	CH211-32G22.2	—	protein_coding	ensembl_havana_gene	ENSDART00000122015.3	ENSDART00000122015^ENSDART00000186325
ENSDARG00000004184		NNN	0.996859	0.996945	0.996859	0.999755		ENSDARG00000004184.12	neurofibromin 1b	ZDB-GENE-091111-4	DKEY-15G19.1	ZDB-GENE-091111-4	protein_coding	ensembl_havana_gene	ENSDART00000131897.4	ENSDART00000131897
ENSDARG00000004187		NNN	0.99541	0.99541	1	1		ENSDARG00000004187.10	zgc:122979	ZDB-GENE-051127-45	DKEY-121H17.4	ZDB-GENE-051127-45	protein_coding	ensembl_havana_gene	ENSDART00000102559.5	ENSDART00000102559
ENSDARG00000004189		NNN	0.712284	0.986249	0.757349	0.712284		ENSDARG00000004189.10	chromobox homolog 1a (HP1 beta homolog Drosophila)	ZDB-GENE-030131-4945	cbx1	—	protein_coding	ensembl_havana_gene	ENSDART00000143088.2	ENSDART00000143088^ENSDART00000151788^ENSDART00000188574
ENSDARG00000004196		SGG	0.0601329	0.999946	0.0601329	0.362598		ENSDARG00000004196.11	TNF superfamily member 10, like	ZDB-GENE-010801-1	tnfsf10l	ZDB-GENE-010801-1	protein_coding	ensembl_havana_gene	ENSDART00000101447.7	ENSDART00000101447^ENSDART00000122113^ENSDART00000124674^ENSDART00000190334
ENSDARG00000004199		NNN	0.21926	0.234757	0.21926	0.389631		ENSDARG00000004199.10	sperm adhesion molecule 1	ZDB-GENE-050506-63	spam1	ZDB-GENE-050506-63	protein_coding	ensembl_havana_gene	ENSDART00000130678.3	ENSDART00000130678^ENSDART00000187245
ENSDARG00000004204		NNN	0.692525	0.940646	0.831954	0.692525		ENSDARG00000004204.11	EF-hand domain (C-terminal) containing 2	ZDB-GENE-031001-10	efhc2	ZDB-GENE-031001-10	protein_coding	ensembl_havana_gene	ENSDART00000008737.9	ENSDART00000008737^ENSDART00000142788
ENSDARG00000004211		NNN	0.999893	0.999893	1	1		ENSDARG00000004211.8	coiled-coil domain containing 106a	ZDB-GENE-050220-4	—	—	protein_coding	ensembl	ENSDART00000011936.8	ENSDART00000011936
ENSDARG00000004218		NNN	0.929569	0.999995	0.929569	0.999998		ENSDARG00000004218.9	Rho family GTPase 1b	ZDB-GENE-060315-7	rnd1l	ZDB-GENE-060315-7	protein_coding	ensembl_havana_gene	ENSDART00000018654.9	ENSDART00000018654^ENSDART00000109712
ENSDARG00000004219		NNN	0.987236	0.999253	0.987236	0.999999		ENSDARG00000004219.10	solute carrier family 6 (neurotransmitter transporter), member 3	ZDB-GENE-010316-1	—	—	protein_coding	ensembl	ENSDART00000129303.3	ENSDART00000129303
ENSDARG00000004227		NNN	0.999431	0.999431	0.999955	0.999982		ENSDARG00000004227.10	phosphodiesterase 3A, cGMP-inhibited	ZDB-GENE-041210-23	DKEY-48H7.2	—	protein_coding	ensembl_havana_gene	ENSDART00000133843.3	ENSDART00000133843^ENSDART00000160308
ENSDARG00000004232		NNN	0.736895	0.736895	0.998646	0.921713		ENSDARG00000004232.9	deltaB	ZDB-GENE-980526-114	dlb	ZDB-GENE-980526-114	protein_coding	ensembl_havana_gene	ENSDART00000019259.9	ENSDART00000019259^ENSDART00000139585
ENSDARG00000004243		NNN	0.960694	0.960694	0.999706	1		ENSDARG00000004243.10	acid-sensing (proton-gated) ion channel family member 4b	ZDB-GENE-040513-6	accn4b	ZDB-GENE-040513-6	protein_coding	ensembl_havana_gene	ENSDART00000104716.6	ENSDART00000104716
ENSDARG00000004246		SBN	0.0890991	1	0.999842	0.0890991		ENSDARG00000004246.10	slit homolog 2 (Drosophila)	ZDB-GENE-010306-3	slit2	ZDB-GENE-010306-3	protein_coding	ensembl_havana_gene	ENSDART00000007531.9	ENSDART00000007531^ENSDART00000171951^ENSDART00000183029^ENSDART00000187183^ENSDART00000188521
ENSDARG00000004251		NNN	0.0646035	0.999992	0.111912	0.0646035		ENSDARG00000004251.9	dihydrofolate reductase	ZDB-GENE-010406-5	dhfr	ZDB-GENE-010406-5	protein_coding	ensembl_havana_gene	ENSDART00000010041.8	ENSDART00000010041
ENSDARG00000004256		NNN	0.105344	0.9662	0.466523	0.105344		ENSDARG00000004256.9	wingless-type MMTV integration site family, member 11	ZDB-GENE-990603-12	wnt11	ZDB-GENE-990603-12	protein_coding	ensembl_havana_gene	ENSDART00000013590.9	ENSDART00000013590
ENSDARG00000004260		NNN	0.650255	0.650255	0.996559	1		ENSDARG00000004260.11	cullin 5b	ZDB-GENE-091113-45	CH73-111I17.3	ZDB-GENE-030131-5426	protein_coding	ensembl_havana_gene	ENSDART00000130179.3	ENSDART00000130179^ENSDART00000172573
ENSDARG00000004261		NGG	0.0321266	0.0586456	0.0321266	0.216528		ENSDARG00000004261.11	transmembrane p24 trafficking protein 9	ZDB-GENE-050417-434	tmed9	DKEYP-110E4.4;ZDB-GENE-050417-434	protein_coding	ensembl_havana_gene	ENSDART00000020582.8	ENSDART00000020582
ENSDARG00000004262		NNN	0.656242	0.997734	0.986073	0.656242		ENSDARG00000004262.10	cytochrome P450, family 46, subfamily A, polypeptide 1, tandem duplicate 2	ZDB-GENE-040426-1184	—	—	protein_coding	ensembl	ENSDART00000057699.5	ENSDART00000057699
ENSDARG00000004270		SGG	0.735277	1	0.735277	0.885439		ENSDARG00000004270.11	atlastin 3	ZDB-GENE-041010-109	atl3	ZDB-GENE-041010-109	protein_coding	ensembl_havana_gene	ENSDART00000023054.10	ENSDART00000023054^ENSDART00000139552^ENSDART00000139975^ENSDART00000144921^ENSDART00000186961^ENSDART00000191666
ENSDARG00000004274		NGG	0.0681094	0.938817	0.144406	0.0681094		ENSDARG00000004274.9	zgc:112496	ZDB-GENE-050320-25	CH211-231F6.3	ZDB-GENE-050320-25	protein_coding	ensembl_havana_gene	ENSDART00000066583.5	ENSDART00000066583
ENSDARG00000004280		NNN	0.439998	0.992103	0.439998	0.626573		ENSDARG00000004280.11	SEH1-like (S. cerevisiae)	ZDB-GENE-030131-6689	seh1l	ZDB-GENE-030131-6689	protein_coding	ensembl_havana_gene	ENSDART00000013865.10	ENSDART00000013865^ENSDART00000151214^ENSDART00000151535^ENSDART00000151637
ENSDARG00000004282		NNN	0.80879	0.993454	0.999997	0.80879		ENSDARG00000004282.7	zgc:77375	ZDB-GENE-040426-1827	CH211-159E12.4	ZDB-GENE-040426-1827	protein_coding	ensembl_havana_gene	ENSDART00000005923.7	ENSDART00000005923
ENSDARG00000004291		NNN	1	1	1	1		ENSDARG00000004291.10	HECT, C2 and WW domain containing E3 ubiquitin protein ligase 1b	ZDB-GENE-060503-2	CH211-106N13.1	—	protein_coding	ensembl_havana_gene	ENSDART00000142835.2	ENSDART00000142835
ENSDARG00000004296		NNN	0.71102	0.71102	0.992911	0.999996		ENSDARG00000004296.8	alpha-1-microglobulin/bikunin precursor	ZDB-GENE-040426-1608	DKEY-21P9.2	ZDB-GENE-040426-1608	protein_coding	ensembl_havana_gene	ENSDART00000027026.7	ENSDART00000027026^ENSDART00000130283^ENSDART00000135457^ENSDART00000135645^ENSDART00000142677^ENSDART00000193648
ENSDARG00000004297		NNN	0.644365	0.644365	1	1		ENSDARG00000004297.7	interferon regulatory factor 2 binding protein-like	ZDB-GENE-040426-1968	CH73-34C17.3	ZDB-GENE-040426-1968	protein_coding	havana	ENSDART00000015418.7	ENSDART00000015418
ENSDARG00000004301		NGG	0.0740175	0.0740175	0.243105	0.125482		ENSDARG00000004301.8	ras homolog family member Gb	ZDB-GENE-030131-8877	rhogb	ZDB-GENE-030131-8877	protein_coding	ensembl_havana_gene	ENSDART00000022562.7	ENSDART00000022562^ENSDART00000187572
ENSDARG00000004302		NNN	0.999482	0.999482	0.999762	1		ENSDARG00000004302.12	solute carrier family 45, member 1	ZDB-GENE-070112-2152	slc45a1	ZDB-GENE-070112-2152	protein_coding	ensembl_havana_gene	ENSDART00000134560.3	ENSDART00000043016^ENSDART00000134560^ENSDART00000173156^ENSDART00000183271
ENSDARG00000004305		SNN	0.994405	0.999576	0.994405	0.999843		ENSDARG00000004305.11	VANGL planar cell polarity protein 1	ZDB-GENE-040621-2	vangl1	ZDB-GENE-040621-2	protein_coding	ensembl_havana_gene	ENSDART00000036926.8	ENSDART00000036926
ENSDARG00000004306		NNN	0.959051	0.959051	0.999411	0.999999		ENSDARG00000004306.10	kelch-like family member 18	ZDB-GENE-030131-5785	klhl18	—	protein_coding	ensembl_havana_gene	ENSDART00000022909.9	ENSDART00000022909
ENSDARG00000004307		NNN	0.0355088	0.0355088	0.993586	0.999931		ENSDARG00000004307.8	LY6/PLAUR domain containing 6	ZDB-GENE-040912-117	DKEY-91I10.6	ZDB-GENE-040912-117	protein_coding	ensembl_havana_gene	ENSDART00000020884.7	ENSDART00000020884
ENSDARG00000004308		NNN	0.65286	0.65286	0.912344	0.686528		ENSDARG00000004308.11	family with sequence similarity 8, member A1b	ZDB-GENE-050410-14	DKEY-37G14.1	ZDB-GENE-050410-14	protein_coding	ensembl_havana_gene	ENSDART00000021533.9	ENSDART00000021533
ENSDARG00000004311		NBB	0.619031	0.619031	0.996629	0.984014		ENSDARG00000004311.7	low density lipoprotein receptor adaptor protein 1a	ZDB-GENE-030328-13	DKEY-264P5.2	ZDB-GENE-030328-13	protein_coding	ensembl_havana_gene	ENSDART00000021396.6	ENSDART00000021396
ENSDARG00000004318		NNN	0.618811	0.994299	0.618811	0.904544		ENSDARG00000004318.8	COBW domain containing	ZDB-GENE-040426-2388	DKEY-91M11.2	ZDB-GENE-040426-2388	protein_coding	ensembl_havana_gene	ENSDART00000012132.8	ENSDART00000012132
ENSDARG00000004322		NNN	0.701583	0.701583	0.993166	0.999501		ENSDARG00000004322.9	Usher syndrome 1Ga (autosomal recessive)	ZDB-GENE-131120-173	CH1073-349G5.1	—	protein_coding	ensembl_havana_gene	ENSDART00000023265.9	ENSDART00000023265^ENSDART00000188412
ENSDARG00000004325		NGG	0.0476664	0.0476664	0.52051	0.683328		ENSDARG00000004325.9	caspase 9, apoptosis-related cysteine peptidase	ZDB-GENE-030825-5	DKEY-7I1.2	ZDB-GENE-041114-106	protein_coding	ensembl_havana_gene	ENSDART00000047020.7	ENSDART00000047020^ENSDART00000137574
ENSDARG00000004328		NNN	0.972011	0.972011	0.992746	0.996525		ENSDARG00000004328.7	si:ch1073-284b18.2	ZDB-GENE-110914-157	CH1073-284B18.2	—	protein_coding	ensembl_havana_gene	ENSDART00000167665.2	ENSDART00000006212^ENSDART00000167665
ENSDARG00000004336		NNN	0.77387	0.77387	0.928979	0.888469		ENSDARG00000004336.10	exocyst complex component 4	ZDB-GENE-041210-112	CH211-92L17.2	—	protein_coding	ensembl_havana_gene	ENSDART00000021384.9	ENSDART00000021384^ENSDART00000101619
ENSDARG00000004343		NNN	0.935015	0.950283	0.935015	0.994029		ENSDARG00000004343.12	negative elongation factor complex member E	ZDB-GENE-040718-69	rdbp	ZDB-GENE-040718-69	protein_coding	ensembl_havana_gene	ENSDART00000148877.3	ENSDART00000148439^ENSDART00000148613^ENSDART00000148877^ENSDART00000149988^ENSDART00000187396^ENSDART00000188978
ENSDARG00000004358		NNN	0.228185	0.228185	0.999931	0.999188		ENSDARG00000004358.7	guanine nucleotide binding protein (G protein), beta polypeptide 3a	ZDB-GENE-040718-134	gnb3a	ZDB-GENE-040718-134	protein_coding	ensembl_havana_gene	ENSDART00000012673.7	ENSDART00000012673
ENSDARG00000004363		NNN	0.0597407	0.998511	0.227807	0.0597407		ENSDARG00000004363.5	LHFPL tetraspan subfamily member 6	ZDB-GENE-041212-82	CH211-266I6.2	ZDB-GENE-041212-82	protein_coding	ensembl_havana_gene	ENSDART00000019416.5	ENSDART00000019416^ENSDART00000182579^ENSDART00000185634
ENSDARG00000004372		NNN	0.987997	0.998528	0.990104	0.987997		ENSDARG00000004372.10	formin-like 3	ZDB-GENE-030131-1571	CH73-60E21.1	ZDB-GENE-030131-1571	protein_coding	ensembl_havana_gene	ENSDART00000109023.4	ENSDART00000109023^ENSDART00000144554^ENSDART00000147440
ENSDARG00000004377		NNN	0.0516925	0.0516925	0.166341	0.998921		ENSDARG00000004377.11	protein phosphatase 1, regulatory subunit 13Ba	ZDB-GENE-030131-9805	CH73-9J13.1	ZDB-GENE-030131-9805	protein_coding	ensembl_havana_gene	ENSDART00000037371.8	ENSDART00000037371^ENSDART00000105050^ENSDART00000135891^ENSDART00000146822^ENSDART00000152005
ENSDARG00000004378		NNN	0.629256	1	0.942588	0.629256		ENSDARG00000004378.12	Yes-related kinase	ZDB-GENE-030131-9517	yrk	ZDB-GENE-030131-9517	protein_coding	ensembl_havana_gene	ENSDART00000148287.3	ENSDART00000136695^ENSDART00000143353^ENSDART00000147290^ENSDART00000148287^ENSDART00000149856^ENSDART00000151433^ENSDART00000188236^ENSDART00000193859
ENSDARG00000004386		NNN	0.999888	0.999888	1	1		ENSDARG00000004386.9	si:dkey-153k10.9	ZDB-GENE-030131-3893	DKEY-153K10.9	ZDB-GENE-030131-3893	protein_coding	ensembl_havana_gene	ENSDART00000004604.9	ENSDART00000004604
ENSDARG00000004392		NNN	1	1	1	1		ENSDARG00000004392.10	hematopoietic death receptor	ZDB-GENE-030826-5	hdr	ZDB-GENE-030826-5	protein_coding	ensembl_havana_gene	ENSDART00000005025.7	ENSDART00000005025^ENSDART00000121886
ENSDARG00000004396		NGG	0.311722	0.921461	0.43891	0.311722		ENSDARG00000004396.8	UDP-GlcNAc:betaGal beta-1,3-N-acetylglucosaminyltransferase 5b	ZDB-GENE-041010-166	b3gnt5b	ZDB-GENE-041010-166	protein_coding	ensembl_havana_gene	ENSDART00000136074.2	ENSDART00000136074
ENSDARG00000004402		NNN	0.54234	0.837948	0.661417	0.54234		ENSDARG00000004402.10	ELOVL fatty acid elongase 6	ZDB-GENE-030114-1	elovl6	ZDB-GENE-030114-1	protein_coding	ensembl_havana_gene	ENSDART00000105602.5	ENSDART00000105602^ENSDART00000141766
ENSDARG00000004405		NGG	0.121267	0.121267	0.286187	0.385746		ENSDARG00000004405.9	sorting nexin 10a	ZDB-GENE-050809-44	—	—	protein_coding	ensembl	ENSDART00000190659.1	ENSDART00000022803^ENSDART00000108627^ENSDART00000187722^ENSDART00000190659
ENSDARG00000004406		NNN	0.0339887	0.892677	0.0339887	0.0394045		ENSDARG00000004406.8	sepiapterin reductase a	ZDB-GENE-050522-412	spra	ZDB-GENE-050522-412	protein_coding	ensembl_havana_gene	ENSDART00000007827.8	ENSDART00000007827
ENSDARG00000004415		NNN	0.991617	0.991617	1	1		ENSDARG00000004415.12	transcription factor 7 like 2	ZDB-GENE-991110-8	tcf7l2	ZDB-GENE-991110-8	protein_coding	ensembl_havana_gene	ENSDART00000005562.9	ENSDART00000005562^ENSDART00000009237^ENSDART00000031408^ENSDART00000121527^ENSDART00000122972^ENSDART00000125046^ENSDART00000128703^ENSDART00000133854^ENSDART00000145967^ENSDART00000153068^ENSDART00000183754^ENSDART00000185635^ENSDART00000189099
ENSDARG00000004427		NNN	0.465583	0.854962	0.614269	0.465583		ENSDARG00000004427.9	dpy-30 histone methyltransferase complex regulatory subunit	ZDB-GENE-040718-136	dpy30	ZDB-GENE-040718-136	protein_coding	ensembl_havana_gene	ENSDART00000024743.8	ENSDART00000024743^ENSDART00000134065
ENSDARG00000004433		NNN	0.967567	0.999999	0.967567	0.996431		ENSDARG00000004433.11	Bruton agammaglobulinemia tyrosine kinase	ZDB-GENE-070531-1	btk	ZDB-GENE-070531-1	protein_coding	ensembl_havana_gene	ENSDART00000148737.3	ENSDART00000148737
ENSDARG00000004436		NNN	0.744835	0.799483	0.800492	0.744835		ENSDARG00000004436.11	family with sequence similarity 92, member A1	ZDB-GENE-040801-123	fam92a1	ZDB-GENE-040801-123	protein_coding	ensembl_havana_gene	ENSDART00000114714.5	ENSDART00000020301^ENSDART00000114714^ENSDART00000134045^ENSDART00000146559
ENSDARG00000004445		NNN	0.702631	0.702631	0.972611	1		ENSDARG00000004445.10	glutamate receptor, metabotropic 5a	ZDB-GENE-090821-9	—	—	protein_coding	ensembl	ENSDART00000193829.1	ENSDART00000042767^ENSDART00000193829
ENSDARG00000004447		NNN	0.904853	1	0.904853	0.987104		ENSDARG00000004447.9	apelin receptor 2	ZDB-GENE-030131-4347	aplnr2	ZDB-GENE-030131-4347	protein_coding	ensembl_havana_gene	ENSDART00000167209.3	ENSDART00000074490^ENSDART00000167209
ENSDARG00000004451		NGG	0.0924003	0.689055	0.0924003	0.206998		ENSDARG00000004451.11	tumor necrosis factor receptor superfamily, member a	ZDB-GENE-010802-1	tnfrsfa	ZDB-GENE-010802-1	protein_coding	ensembl_havana_gene	ENSDART00000124871.4	ENSDART00000124871
ENSDARG00000004452		NNN	0.987125	0.987125	0.998504	0.999992		ENSDARG00000004452.10	TAR DNA binding protein, like	ZDB-GENE-031030-1	tardbpl	ZDB-GENE-031030-1	protein_coding	ensembl_havana_gene	ENSDART00000027255.6	ENSDART00000027255^ENSDART00000126681^ENSDART00000139223^ENSDART00000141928^ENSDART00000189242
ENSDARG00000004455		NNN	0.279992	0.982412	0.279992	0.626563		ENSDARG00000004455.10	purinergic receptor P2X, ligand-gated ion channel, 5	ZDB-GENE-030319-5	p2rx5	ZDB-GENE-030319-5	protein_coding	ensembl_havana_gene	ENSDART00000014404.9	ENSDART00000014404
ENSDARG00000004459		NNN	0.992211	0.99561	0.992211	0.997679		ENSDARG00000004459.11	unc-119 lipid binding chaperone B homolog 2	ZDB-GENE-030131-7635	CH73-248E21.4	ZDB-GENE-030131-7635	protein_coding	ensembl_havana_gene	ENSDART00000151639.3	ENSDART00000028010^ENSDART00000151639
ENSDARG00000004460		NNN	0.986879	0.986879	1	1		ENSDARG00000004460.11	desumoylating isopeptidase 2	ZDB-GENE-040801-39	desi2	ZDB-GENE-040801-39	protein_coding	ensembl_havana_gene	ENSDART00000034935.5	ENSDART00000034935^ENSDART00000166908
ENSDARG00000004470		NNN	0.489587	0.489587	0.543592	0.544218		ENSDARG00000004470.11	protein kinase C substrate 80K-H	ZDB-GENE-040426-770	prkcsh	ZDB-GENE-040426-770	protein_coding	ensembl_havana_gene	ENSDART00000023814.10	ENSDART00000023814^ENSDART00000133283^ENSDART00000136051^ENSDART00000164930^ENSDART00000185437
ENSDARG00000004472		NNN	0.829749	0.829749	1	1		ENSDARG00000004472.9	alpha tubulin acetyltransferase 1	ZDB-GENE-040426-2120	atat1	ZDB-GENE-040426-2120	protein_coding	ensembl_havana_gene	ENSDART00000049368.7	ENSDART00000049368^ENSDART00000103922^ENSDART00000185426
ENSDARG00000004473		SNN	0.571015	0.996663	0.571015	0.994492		ENSDARG00000004473.8	T-box 21	ZDB-GENE-080104-3	tbx21	ZDB-GENE-080104-3	protein_coding	ensembl_havana_gene	ENSDART00000013980.8	ENSDART00000013980
ENSDARG00000004492		NNN	0.923708	0.937052	0.923708	0.999975		ENSDARG00000004492.10	phosphate cytidylyltransferase 1, choline, alpha b	ZDB-GENE-050522-114	—	—	protein_coding	ensembl	ENSDART00000027772.10	ENSDART00000027772
ENSDARG00000004497		SBB	0.996042	1	0.996896	0.996042		ENSDARG00000004497.8	tetraspanin 33a	ZDB-GENE-040718-361	DKEY-180P18.5	—	protein_coding	ensembl_havana_gene	ENSDART00000002770.8	ENSDART00000002770^ENSDART00000111882^ENSDART00000148292
ENSDARG00000004498		NBB	0.87739	0.87739	0.999024	0.985045		ENSDARG00000004498.10	XK, Kell blood group complex subunit-related family, member 8, tandem duplicate 1	ZDB-GENE-110106-1	xkr8.1	ZDB-GENE-110106-1	protein_coding	ensembl_havana_gene	ENSDART00000104033.5	ENSDART00000104033
ENSDARG00000004502		NNN	0.981194	0.981194	0.999983	0.999999		ENSDARG00000004502.12	REST corepressor 3	ZDB-GENE-050208-371	rcor3	ZDB-GENE-040426-1812	protein_coding	ensembl_havana_gene	ENSDART00000143792.3	ENSDART00000143792
ENSDARG00000004517		NBB	0.997189	0.999918	0.997189	0.999973		ENSDARG00000004517.12	phosphoribosyl pyrophosphate amidotransferase	ZDB-GENE-041210-323	ppat	ZDB-GENE-041210-323	protein_coding	ensembl_havana_gene	ENSDART00000078385.6	ENSDART00000078385^ENSDART00000143883
ENSDARG00000004525		NNN	0.0292357	0.955717	0.0597287	0.0292357		ENSDARG00000004525.8	zgc:63882	ZDB-GENE-040426-1286	—	—	protein_coding	ensembl	ENSDART00000020463.8	ENSDART00000020463
ENSDARG00000004527		NNN	0.819852	0.995731	0.880538	0.819852		ENSDARG00000004527.7	protein (peptidylprolyl cis/trans isomerase) NIMA-interacting, 4 (parvulin)	ZDB-GENE-050522-117	CH73-86C12.1	ZDB-GENE-050522-117	protein_coding	ensembl_havana_gene	ENSDART00000026846.7	ENSDART00000026846
ENSDARG00000004529		NNN	0.210117	0.559643	0.210117	0.589105		ENSDARG00000004529.11	zgc:173742	ZDB-GENE-030131-6489	DKEY-204J6.1	—	protein_coding	ensembl_havana_gene	ENSDART00000006628.10	ENSDART00000006628^ENSDART00000151641^ENSDART00000186558
ENSDARG00000004537		NNN	0.987248	0.987248	0.999722	0.998995		ENSDARG00000004537.11	lysine (K)-specific methyltransferase 2A	ZDB-GENE-080521-3	mll	ZDB-GENE-080521-3	protein_coding	ensembl_havana_gene	ENSDART00000148840.2	ENSDART00000104525^ENSDART00000148840
ENSDARG00000004539		SGG	0.286459	1	0.286459	0.587502		ENSDARG00000004539.8	prostaglandin-endoperoxide synthase 2a	ZDB-GENE-020530-2	ptgs2a	ZDB-GENE-020530-2	protein_coding	ensembl_havana_gene	ENSDART00000006870.8	ENSDART00000006870^ENSDART00000150051
ENSDARG00000004561		NNN	0.314473	0.314473	0.988952	1		ENSDARG00000004561.11	protein kinase C, gamma	ZDB-GENE-090206-1	prkcg	ZDB-GENE-090206-1	protein_coding	havana	ENSDART00000142610.3	ENSDART00000142610
ENSDARG00000004574		NNN	0.949419	0.996944	0.949419	0.998737		ENSDARG00000004574.10	general transcription factor IIIC, polypeptide 2, beta	ZDB-GENE-041014-349	gtf3c2	ZDB-GENE-041014-349	protein_coding	ensembl_havana_gene	ENSDART00000020969.9	ENSDART00000020969^ENSDART00000101262^ENSDART00000145254^ENSDART00000153416
ENSDARG00000004576		NNN	0.697676	0.991385	0.891612	0.697676		ENSDARG00000004576.10	polo-like kinase 4 (Drosophila)	ZDB-GENE-030619-14	plk4	ZDB-GENE-030619-14	protein_coding	ensembl_havana_gene	ENSDART00000043866.7	ENSDART00000043866
ENSDARG00000004577		NNN	0.999961	0.999977	0.999961	1		ENSDARG00000004577.8	zgc:194665	ZDB-GENE-080722-38	—	—	protein_coding	ensembl	ENSDART00000026401.8	ENSDART00000026401
ENSDARG00000004580		NNN	0.995217	0.995217	1	1		ENSDARG00000004580.6	nicotinamide nucleotide adenylyltransferase 2	ZDB-GENE-030131-8201	nmnat2	—	protein_coding	ensembl_havana_gene	ENSDART00000003550.6	ENSDART00000003550
ENSDARG00000004581		NNN	0.564808	0.564808	0.749928	0.749481		ENSDARG00000004581.10	sel-1 suppressor of lin-12-like (C. elegans)	ZDB-GENE-041001-122	sel1l	ZDB-GENE-041001-122	protein_coding	ensembl_havana_gene	ENSDART00000012816.10	ENSDART00000012816
ENSDARG00000004586		NNN	0.936271	0.996663	0.936271	0.999998		ENSDARG00000004586.9	neurotrophic tyrosine kinase, receptor, type 1	ZDB-GENE-980526-118	ntrk1	ZDB-GENE-980526-118	protein_coding	ensembl_havana_gene	ENSDART00000027013.5	ENSDART00000027013^ENSDART00000128068
ENSDARG00000004587		NNN	0.989917	0.997279	0.991855	0.989917		ENSDARG00000004587.11	K(lysine) acetyltransferase 5b	ZDB-GENE-030131-985	DKEY-110K5.2	—	protein_coding	ensembl_havana_gene	ENSDART00000032909.5	ENSDART00000032909^ENSDART00000132155^ENSDART00000138902^ENSDART00000142420^ENSDART00000143929^ENSDART00000147889
ENSDARG00000004588		NNN	0.511704	0.511704	0.999992	1		ENSDARG00000004588.8	SRY (sex determining region Y)-box 4a	ZDB-GENE-030131-8290	sox4a	ZDB-GENE-030131-8290	protein_coding	ensembl_havana_gene	ENSDART00000026992.8	ENSDART00000026992^ENSDART00000191453
ENSDARG00000004592		NNN	0.995627	0.995627	0.995741	0.998377		ENSDARG00000004592.12	G protein-coupled receptor 22a	ZDB-GENE-041210-48	gpr22	ZDB-GENE-041210-48	protein_coding	ensembl_havana_gene	ENSDART00000128807.4	ENSDART00000013924^ENSDART00000128807
ENSDARG00000004594		NNN	0.997627	0.997627	0.999611	1		ENSDARG00000004594.10	zinc finger protein 800a	ZDB-GENE-041008-151	DKEY-42P14.5	—	protein_coding	ensembl_havana_gene	ENSDART00000153839.3	ENSDART00000098307^ENSDART00000153839^ENSDART00000191254
ENSDARG00000004597		NNN	0.897465	0.897465	0.998692	1		ENSDARG00000004597.10	leucine rich repeat containing 4Ba	ZDB-GENE-080327-25	DKEY-13N23.1	—	protein_coding	ensembl_havana_gene	ENSDART00000150958.2	ENSDART00000150958^ENSDART00000183790^ENSDART00000186832
ENSDARG00000004598		NNG	0.0894072	0.544469	0.0894072	0.518446		ENSDARG00000004598.4	odorant receptor, family C, subfamily 102, member 2	ZDB-GENE-010308-4	or102-2	ZDB-GENE-010308-4	protein_coding	havana	ENSDART00000017810.4	ENSDART00000017810
ENSDARG00000004616		NGG	0.189102	0.189102	0.608465	0.838481		ENSDARG00000004616.8	myotubularin related protein 2	ZDB-GENE-990715-14	mtmr2	ZDB-GENE-990715-14	protein_coding	ensembl_havana_gene	ENSDART00000020004.6	ENSDART00000020004
ENSDARG00000004618		NNG	0.0226214	0.51411	0.0226214	0.578005		ENSDARG00000004618.12	syntaxin 2a	ZDB-GENE-040801-80	DKEY-275N23.2	ZDB-GENE-040801-80	protein_coding	ensembl_havana_gene	ENSDART00000026737.10	ENSDART00000026737^ENSDART00000148154
ENSDARG00000004621		NNN	0.999623	0.999623	1	1		ENSDARG00000004621.13	glycoprotein M6Ab	ZDB-GENE-030710-8	gpm6ab	ZDB-GENE-030710-8	protein_coding	ensembl_havana_gene	ENSDART00000148404.2	ENSDART00000128794^ENSDART00000130324^ENSDART00000132402^ENSDART00000133771^ENSDART00000134996^ENSDART00000148404^ENSDART00000149487
ENSDARG00000004627		NNN	0.622883	0.622883	0.998974	0.88283		ENSDARG00000004627.7	pannexin 3	ZDB-GENE-091204-114	DKEY-263O8.2	—	protein_coding	ensembl_havana_gene	ENSDART00000027288.6	ENSDART00000027288^ENSDART00000146116
ENSDARG00000004632		NNN	0.642157	0.999989	0.642157	0.924349		ENSDARG00000004632.9	egl-9 family hypoxia-inducible factor 1b	ZDB-GENE-040718-338	egln1b	ZDB-GENE-040718-338	protein_coding	ensembl_havana_gene	ENSDART00000024296.8	ENSDART00000024296
ENSDARG00000004633		NNN	0.967183	0.967183	0.999873	1		ENSDARG00000004633.11	epsin 3b	ZDB-GENE-121214-173	DKEY-27J5.4	—	protein_coding	ensembl_havana_gene	ENSDART00000062841.7	ENSDART00000062841^ENSDART00000152440
ENSDARG00000004634		NNN	0.0257278	0.463487	0.145023	0.0257278		ENSDARG00000004634.11	oxysterol binding protein	ZDB-GENE-090312-18	CH211-149G8.3	ZDB-GENE-090312-18	protein_coding	ensembl_havana_gene	ENSDART00000141530.3	ENSDART00000141530^ENSDART00000150326
ENSDARG00000004635		NNN	0.144327	0.144327	0.961221	0.999962		ENSDARG00000004635.14	eph receptor A7	ZDB-GENE-030131-3745	epha7	ZDB-GENE-030131-3745	protein_coding	ensembl_havana_gene	ENSDART00000102788.8	ENSDART00000102788^ENSDART00000159122
ENSDARG00000004636		NNN	0.685245	0.932267	0.685245	0.914535		ENSDARG00000004636.12	coiled-coil domain containing 9	ZDB-GENE-060929-520	DKEY-40J24.2	ZDB-GENE-060929-520	protein_coding	ensembl_havana_gene	ENSDART00000027563.10	ENSDART00000027563^ENSDART00000126046^ENSDART00000132459^ENSDART00000181674
ENSDARG00000004643		NNN	0.991343	0.991343	0.99745	0.998745		ENSDARG00000004643.9	cadherin-related family member 1a	ZDB-GENE-040924-4	pcdh21	ZDB-GENE-040924-4	protein_coding	ensembl_havana_gene	ENSDART00000110005.4	ENSDART00000026679^ENSDART00000110005
ENSDARG00000004647		NNN	0.987394	0.999828	0.998576	0.987394		ENSDARG00000004647.9	spindle and centriole associated protein 1	ZDB-GENE-041212-64	—	—	protein_coding	ensembl	ENSDART00000012653.9	ENSDART00000012653
ENSDARG00000004648		NNN	0.966298	0.966298	0.999968	1		ENSDARG00000004648.9	potassium channel tetramerization domain containing 16a	ZDB-GENE-060117-1	kctd16a	ZDB-GENE-060117-1	protein_coding	ensembl_havana_gene	ENSDART00000014411.8	ENSDART00000014411
ENSDARG00000004658		SBB	0.997665	0.999996	0.997665	0.998303		ENSDARG00000004658.9	zgc:101810	ZDB-GENE-041121-7	CH211-168D1.2	ZDB-GENE-041121-7	protein_coding	ensembl_havana_gene	ENSDART00000012637.9	ENSDART00000012637
ENSDARG00000004672		NNB	0.0332029	0.892592	0.0332029	0.998694		ENSDARG00000004672.13	protein tyrosine kinase 2ab	ZDB-GENE-020114-1	ptk2.1	ZDB-GENE-020114-1	protein_coding	ensembl_havana_gene	ENSDART00000042716.9	ENSDART00000042716^ENSDART00000122474^ENSDART00000128158^ENSDART00000129594^ENSDART00000132305^ENSDART00000134302^ENSDART00000136718^ENSDART00000137745^ENSDART00000140441^ENSDART00000145293^ENSDART00000189925^ENSDART00000190168^ENSDART00000190444^ENSDART00000191106^ENSDART00000191321^ENSDART00000192231
ENSDARG00000004680		NNN	0.832413	0.832413	0.907062	0.987348		ENSDARG00000004680.8	DnaJ (Hsp40) homolog, subfamily B, member 6a	ZDB-GENE-040718-45	DKEY-265A7.6	ZDB-GENE-040718-45	protein_coding	ensembl_havana_gene	ENSDART00000019417.6	ENSDART00000019417^ENSDART00000185119
ENSDARG00000004687		SGN	0.043924	0.983632	0.766165	0.043924		ENSDARG00000004687.8	acetyl-CoA acyltransferase 1	ZDB-GENE-040704-48	acaa1	ZDB-GENE-040704-48	protein_coding	ensembl_havana_gene	ENSDART00000007997.8	ENSDART00000007997
ENSDARG00000004692		NNN	0.184803	0.959486	0.184803	0.457125		ENSDARG00000004692.8	nucleic acid binding protein 1a	ZDB-GENE-041212-71	DKEY-191G15.2	ZDB-GENE-041212-71	protein_coding	ensembl_havana_gene	ENSDART00000135356.2	ENSDART00000007914^ENSDART00000135356^ENSDART00000147286
ENSDARG00000004695		NGG	0.683904	0.884702	0.688321	0.683904		ENSDARG00000004695.11	SIX homeobox 4a	ZDB-GENE-010201-2	six4a	ZDB-GENE-010201-2	protein_coding	ensembl_havana_gene	ENSDART00000135381.3	ENSDART00000135381^ENSDART00000143903
ENSDARG00000004696		NNN	0.0292546	0.831862	0.0292546	0.0856292		ENSDARG00000004696.8	eukaryotic elongation factor, selenocysteine-tRNA-specific	ZDB-GENE-051120-72	DKEY-265K7.3	ZDB-GENE-051120-72	protein_coding	ensembl_havana_gene	ENSDART00000007783.8	ENSDART00000007783
ENSDARG00000004697		NNN	0.264514	0.9904	0.285185	0.264514		ENSDARG00000004697.12	retinoid X receptor, gamma b	ZDB-GENE-040718-34	rxrgb	ZDB-GENE-040718-34	protein_coding	ensembl_havana_gene	ENSDART00000002554.10	ENSDART00000002554^ENSDART00000170930
ENSDARG00000004702		NGG	0.0265377	0.0265377	0.0594492	0.093438		ENSDARG00000004702.9	interferon regulatory factor 2 binding protein 2a	ZDB-GENE-030131-7809	CH1073-404G22.1	ZDB-GENE-030131-7809	protein_coding	ensembl_havana_gene	ENSDART00000136991.2	ENSDART00000136991
ENSDARG00000004706		NNN	0.787497	0.966245	0.787497	0.847385		ENSDARG00000004706.10	SYF2 pre-mRNA-splicing factor	ZDB-GENE-040801-170	CH211-168H21.1	ZDB-GENE-040801-170	protein_coding	ensembl_havana_gene	ENSDART00000099950.4	ENSDART00000099950^ENSDART00000145016^ENSDART00000146278
ENSDARG00000004712		NNN	0.990535	0.990535	0.999955	1		ENSDARG00000004712.9	T-box, brain, 1b	ZDB-GENE-000323-1	—	—	protein_coding	ensembl	ENSDART00000006612.7	ENSDART00000006612
ENSDARG00000004713		NNN	0.137521	0.899233	0.266172	0.137521		ENSDARG00000004713.7	MAD2 mitotic arrest deficient-like 1 (yeast)	ZDB-GENE-030515-3	CH211-127L8.2	ZDB-GENE-050417-251	protein_coding	ensembl_havana_gene	ENSDART00000028017.7	ENSDART00000028017
ENSDARG00000004714		NNN	1	1	1	1		ENSDARG00000004714.13	transcription factor 12	ZDB-GENE-040516-11	tcf12	ZDB-GENE-040516-11	protein_coding	ensembl_havana_gene	ENSDART00000174218.2	ENSDART00000009938^ENSDART00000073766^ENSDART00000131282^ENSDART00000136745^ENSDART00000138263^ENSDART00000140338^ENSDART00000161387^ENSDART00000174049^ENSDART00000174117^ENSDART00000174218^ENSDART00000174292^ENSDART00000174335^ENSDART00000174355^ENSDART00000174369
ENSDARG00000004721		NNN	0.357636	0.658101	0.357636	0.999972		ENSDARG00000004721.10	membrane protein, palmitoylated 5b (MAGUK p55 subfamily member 5)	ZDB-GENE-060531-2	mpp5b	ZDB-GENE-060531-2	protein_coding	ensembl_havana_gene	ENSDART00000028084.8	ENSDART00000028084
ENSDARG00000004724		NPP	0.985341	0.999956	0.999994	0.985341		ENSDARG00000004724.11	transcription elongation factor A (SII), 3	ZDB-GENE-040426-1860	CH211-199C22.2	ZDB-GENE-040426-1860	protein_coding	ensembl_havana_gene	ENSDART00000006061.10	ENSDART00000006061^ENSDART00000134037^ENSDART00000140552
ENSDARG00000004726		NNN	0.400286	0.863719	0.400286	0.551713		ENSDARG00000004726.10	trafficking protein particle complex 11	ZDB-GENE-030131-1723	flj12716l	ZDB-GENE-030131-1723	protein_coding	ensembl_havana_gene	ENSDART00000054809.6	ENSDART00000054809
ENSDARG00000004735		NNN	0.982825	0.982825	0.999777	0.999975		ENSDARG00000004735.12	heterogeneous nuclear ribonucleoprotein Ub	ZDB-GENE-030131-6422	hnrpu	ZDB-GENE-030131-6422	protein_coding	ensembl_havana_gene	ENSDART00000122696.5	ENSDART00000006954^ENSDART00000122696
ENSDARG00000004745		NGG	0.0901413	0.464485	0.0901413	0.186741		ENSDARG00000004745.6	limb development membrane protein 1-like	ZDB-GENE-030131-9906	lmbr1l	ZDB-GENE-030131-9906	protein_coding	ensembl_havana_gene	ENSDART00000027224.6	ENSDART00000027224^ENSDART00000134008
ENSDARG00000004748		SPP	1	1	1	1		ENSDARG00000004748.11	zgc:100868	ZDB-GENE-040801-33	CH211-198P11.3	ZDB-GENE-040801-33	protein_coding	ensembl_havana_gene	ENSDART00000161644.3	ENSDART00000135192^ENSDART00000161644
ENSDARG00000004753		NNN	0.658352	0.658352	0.73955	1		ENSDARG00000004753.11	myosin light chain kinase b	ZDB-GENE-041111-150	DKEY-226N16.2	—	protein_coding	ensembl_havana_gene	ENSDART00000027684.10	ENSDART00000027684^ENSDART00000172318^ENSDART00000189438
ENSDARG00000004754		NNN	0.428766	0.982721	0.52976	0.428766		ENSDARG00000004754.11	heat shock protein 4a	ZDB-GENE-040426-2832	hspa4a	ZDB-GENE-040426-2832	protein_coding	ensembl_havana_gene	ENSDART00000021037.10	ENSDART00000021037^ENSDART00000148630
ENSDARG00000004757		NNG	0.0920231	0.95575	0.0920231	0.905243		ENSDARG00000004757.11	Y box binding protein 1	ZDB-GENE-000629-3	ybx1	—	protein_coding	ensembl_havana_gene	ENSDART00000024320.11	ENSDART00000024320^ENSDART00000110512^ENSDART00000126513^ENSDART00000128057^ENSDART00000163922
ENSDARG00000004763		SGG	0.0457263	0.999881	0.0457263	0.0674024		ENSDARG00000004763.7	HERV-H LTR-associating 2a, tandem duplicate 2	ZDB-GENE-091204-324	CH211-244C8.2	—	protein_coding	havana	ENSDART00000006284.7	ENSDART00000006284
ENSDARG00000004771		NNN	0.223545	0.223545	0.816532	0.966566		ENSDARG00000004771.11	ankyrin repeat domain 10b	ZDB-GENE-061013-49	CH211-235E18.4	ZDB-GENE-061013-49	protein_coding	ensembl_havana_gene	ENSDART00000102562.5	ENSDART00000102562^ENSDART00000138056^ENSDART00000138836^ENSDART00000144712^ENSDART00000148302
ENSDARG00000004774		NNN	0.245981	0.999996	0.245981	0.576889		ENSDARG00000004774.10	WD repeat domain 36	ZDB-GENE-030131-464	wdr36	ZDB-GENE-030131-464	protein_coding	ensembl_havana_gene	ENSDART00000014049.9	ENSDART00000014049
ENSDARG00000004782		NGG	0.123486	0.930249	0.123486	0.316876		ENSDARG00000004782.13	fibroblast growth factor receptor 3	ZDB-GENE-000816-1	—	—	protein_coding	ensembl	ENSDART00000013534.9	ENSDART00000013534^ENSDART00000125883
ENSDARG00000004785		NNN	0.764827	0.981181	0.807328	0.764827		ENSDARG00000004785.8	COP9 signalosome subunit 2	ZDB-GENE-040625-15	cops2	ZDB-GENE-040625-15	protein_coding	ensembl_havana_gene	ENSDART00000006124.8	ENSDART00000006124^ENSDART00000133872
ENSDARG00000004789		NNN	0.93203	0.93203	0.99998	0.999997		ENSDARG00000004789.11	low density lipoprotein receptor-related protein 1Ba	ZDB-GENE-050208-608	CH211-181P13.1	—	protein_coding	ensembl_havana_gene	ENSDART00000180379.1	ENSDART00000133385^ENSDART00000180379
ENSDARG00000004794		NNN	0.170809	0.999751	0.454763	0.170809		ENSDARG00000004794.10	coiled-coil domain containing 146	ZDB-GENE-041210-217	CH211-276E22.2	—	protein_coding	ensembl_havana_gene	ENSDART00000017947.9	ENSDART00000017947^ENSDART00000135451
ENSDARG00000004796		NNN	0.952687	0.952687	0.99996	0.999984		ENSDARG00000004796.8	mahogunin, ring finger 1b	ZDB-GENE-110401-3	—	—	protein_coding	ensembl	ENSDART00000078221.6	ENSDART00000008988^ENSDART00000078221
ENSDARG00000004806		NGN	0.0565817	0.999047	0.0565817	0.554601		ENSDARG00000004806.8	glutamate-rich WD repeat containing 1	ZDB-GENE-030131-9844	grwd1	ZDB-GENE-030131-9844	protein_coding	ensembl_havana_gene	ENSDART00000121998.3	ENSDART00000121998
ENSDARG00000004823		NNN	0.551341	0.995291	0.977663	0.551341		ENSDARG00000004823.6	ankyrin repeat, SAM and basic leucine zipper domain containing 1	ZDB-GENE-040426-988	asz1	ZDB-GENE-040426-988	protein_coding	ensembl_havana_gene	ENSDART00000005145.6	ENSDART00000005145
ENSDARG00000004830		NNG	0.0216719	0.0791652	0.0216719	0.0639994		ENSDARG00000004830.10	flotillin 2a	ZDB-GENE-020430-3	flot2a	ZDB-GENE-020430-3	protein_coding	ensembl_havana_gene	ENSDART00000003947.6	ENSDART00000003947^ENSDART00000148852^ENSDART00000149413
ENSDARG00000004836		NNN	0.997728	0.997728	1	1		ENSDARG00000004836.10	DnaJ (Hsp40) homolog, subfamily C, member 5ab	ZDB-GENE-081021-2	CH211-195I16.6	—	protein_coding	ensembl_havana_gene	ENSDART00000187181.1	ENSDART00000148423^ENSDART00000187181
ENSDARG00000004840		NNN	0.029419	0.999991	0.029419	0.857272		ENSDARG00000004840.13	Ras association (RalGDS/AF-6) domain family 1	ZDB-GENE-040912-14	rassf1	ZDB-GENE-040912-14	protein_coding	ensembl_havana_gene	ENSDART00000145459.3	ENSDART00000038465^ENSDART00000142265^ENSDART00000145459
ENSDARG00000004843		NGG	0.420927	0.997633	0.420927	0.565265		ENSDARG00000004843.12	forkhead box P1a	ZDB-GENE-060929-624	foxp1a	ZDB-GENE-060929-624	protein_coding	ensembl_havana_gene	ENSDART00000129022.4	ENSDART00000104985^ENSDART00000129022^ENSDART00000136509^ENSDART00000146526^ENSDART00000177571^ENSDART00000189721
ENSDARG00000004851		NNN	0.184058	0.925418	0.184058	0.246637		ENSDARG00000004851.10	histone H4 transcription factor	ZDB-GENE-040426-2764	mizf	ZDB-GENE-040426-2764	protein_coding	ensembl_havana_gene	ENSDART00000051414.5	ENSDART00000051414^ENSDART00000124487^ENSDART00000188375
ENSDARG00000004861		NNN	0.998733	0.998733	1	1		ENSDARG00000004861.9	estrogen-related receptor beta	ZDB-GENE-040616-2	esrrg	ZDB-GENE-030821-2	protein_coding	ensembl_havana_gene	ENSDART00000009104.6	ENSDART00000009104^ENSDART00000166976
ENSDARG00000004864		NNG	0.115983	0.776587	0.115983	0.427036		ENSDARG00000004864.5	zgc:171734	ZDB-GENE-070928-26	—	—	protein_coding	ensembl	ENSDART00000019561.5	ENSDART00000019561
ENSDARG00000004866		NNN	0.33231	0.997429	0.776899	0.33231		ENSDARG00000004866.10	MINDY lysine 48 deubiquitinase 1	ZDB-GENE-070717-2	fam63a	ZDB-GENE-070717-2	protein_coding	ensembl_havana_gene	ENSDART00000147491.3	ENSDART00000136502^ENSDART00000147491
ENSDARG00000004869		NNN	0.0962995	0.0962995	0.934312	0.997727		ENSDARG00000004869.6	proenkephalin a	ZDB-GENE-030729-31	penkl	ZDB-GENE-030729-31	protein_coding	ensembl_havana_gene	ENSDART00000142013.2	ENSDART00000142013
ENSDARG00000004870		NNN	0.298822	0.298822	0.623688	0.35247		ENSDARG00000004870.12	presenilin 1	ZDB-GENE-991119-4	psen1	ZDB-GENE-991119-4	protein_coding	ensembl_havana_gene	ENSDART00000166687.3	ENSDART00000149864^ENSDART00000150089^ENSDART00000166687^ENSDART00000185749
ENSDARG00000004871		NNN	0.0666571	0.960562	0.585593	0.0666571		ENSDARG00000004871.10	macrophage stimulating 1 receptor b	ZDB-GENE-071218-3	mst1rb	ZDB-GENE-071218-3	protein_coding	ensembl_havana_gene	ENSDART00000014018.9	ENSDART00000014018^ENSDART00000150006
ENSDARG00000004874		NNN	0.0421404	0.519483	0.374127	0.0421404		ENSDARG00000004874.6	spermatogenesis associated 6-like	ZDB-GENE-040426-1369	spata6l	ZDB-GENE-040426-1369	protein_coding	ensembl_havana_gene	ENSDART00000008421.6	ENSDART00000008421^ENSDART00000157585^ENSDART00000161061^ENSDART00000163581^ENSDART00000166055^ENSDART00000167046^ENSDART00000167136^ENSDART00000169563
ENSDARG00000004875		SBB	0.999649	0.999999	0.999819	0.999649		ENSDARG00000004875.11	transmembrane channel-like 6b	ZDB-GENE-040718-460	tmc6b	ZDB-GENE-040718-460	protein_coding	ensembl_havana_gene	ENSDART00000167828.3	ENSDART00000167828^ENSDART00000173150
ENSDARG00000004877		SGG	0.690099	1	0.852612	0.690099		ENSDARG00000004877.14	rho-associated, coiled-coil containing protein kinase 2b	ZDB-GENE-060125-2	rock2b	ZDB-GENE-060125-2	protein_coding	ensembl_havana_gene	ENSDART00000166573.2	ENSDART00000147168^ENSDART00000152839^ENSDART00000153420^ENSDART00000157427^ENSDART00000164401^ENSDART00000166573
ENSDARG00000004880		NNN	0.0711135	0.414306	0.769692	0.0711135		ENSDARG00000004880.8	acyl-CoA synthetase medium chain family member 3	ZDB-GENE-080220-22	CH73-60L17.3	ZDB-CDNA-080204-396	protein_coding	ensembl_havana_gene	ENSDART00000041806.6	ENSDART00000041806
ENSDARG00000004889		NNN	0.355569	0.935363	0.793744	0.355569		ENSDARG00000004889.10	aspartylglucosaminidase	ZDB-GENE-040426-2311	aga	ZDB-GENE-040426-2311	protein_coding	ensembl_havana_gene	ENSDART00000016728.9	ENSDART00000016728^ENSDART00000173350
ENSDARG00000004891		NNN	0.670283	0.903256	0.670283	0.994413		ENSDARG00000004891.10	peroxisomal biogenesis factor 19	ZDB-GENE-050417-424	pex19	ZDB-GENE-050417-424	protein_coding	ensembl_havana_gene	ENSDART00000045016.8	ENSDART00000020135^ENSDART00000045016^ENSDART00000142940^ENSDART00000146409
ENSDARG00000004898		NNN	0.535354	0.927475	0.859222	0.535354		ENSDARG00000004898.9	zona pellucida glycoprotein 2, like 2	ZDB-GENE-060818-4	—	—	protein_coding	ensembl	ENSDART00000065475.6	ENSDART00000065475
ENSDARG00000004904		NNN	0.990255	0.995119	0.990255	1		ENSDARG00000004904.10	glycogen synthase 2	ZDB-GENE-030826-31	gys2	ZDB-GENE-030826-31	protein_coding	ensembl_havana_gene	ENSDART00000014007.8	ENSDART00000014007^ENSDART00000165289^ENSDART00000185839
ENSDARG00000004906		NNN	0.761823	0.996525	0.761823	0.939821		ENSDARG00000004906.9	stress-induced phosphoprotein 1	ZDB-GENE-041121-17	stip1	ZDB-GENE-041121-17	protein_coding	ensembl_havana_gene	ENSDART00000112488.4	ENSDART00000041441^ENSDART00000112488^ENSDART00000149379
ENSDARG00000004925		NPP	0.927268	0.927268	0.99823	0.992917		ENSDARG00000004925.12	inner mitochondrial membrane peptidase subunit 2	ZDB-GENE-040808-9	immp2l	ZDB-GENE-040808-9	protein_coding	ensembl_havana_gene	ENSDART00000141481.3	ENSDART00000010706^ENSDART00000141481
ENSDARG00000004930		SPP	0.999999	1	1	0.999999		ENSDARG00000004930.11	LIM domain 7a	ZDB-GENE-030219-74	DKEY-57A22.10	—	protein_coding	ensembl_havana_gene	ENSDART00000009920.11	ENSDART00000009920^ENSDART00000090782^ENSDART00000134084^ENSDART00000134768^ENSDART00000135395^ENSDART00000136349^ENSDART00000136534^ENSDART00000139614^ENSDART00000143305^ENSDART00000144843^ENSDART00000145085^ENSDART00000145576^ENSDART00000146528
ENSDARG00000004931		NNN	0.999089	0.999702	0.999089	1		ENSDARG00000004931.9	solute carrier family 8 (sodium/calcium exchanger), member 3	ZDB-GENE-050810-1	slc8a3	ZDB-GENE-050810-1	protein_coding	ensembl_havana_gene	ENSDART00000100204.4	ENSDART00000100204
ENSDARG00000004932		NNN	0.0206091	0.0206091	0.896735	0.919574		ENSDARG00000004932.11	anosmin 1b	ZDB-GENE-000201-13	kal1b	ZDB-GENE-000201-13	protein_coding	ensembl_havana_gene	ENSDART00000003736.9	ENSDART00000003736^ENSDART00000144318
ENSDARG00000004937		NNN	0.986421	0.999608	0.988928	0.986421		ENSDARG00000004937.9	S-phase kinase-associated protein 2, E3 ubiquitin protein ligase	ZDB-GENE-030219-158	skp2	ZDB-GENE-030219-158	protein_coding	ensembl_havana_gene	ENSDART00000101751.5	ENSDART00000101751^ENSDART00000131624^ENSDART00000134320^ENSDART00000136904^ENSDART00000140520
ENSDARG00000004939		NNN	0.999994	0.999999	0.999994	1		ENSDARG00000004939.10	metadherin b	ZDB-GENE-090929-2	mtdhb	ZDB-GENE-090929-2	protein_coding	havana	ENSDART00000015170.8	ENSDART00000015170^ENSDART00000075937
ENSDARG00000004948		NNN	0.300943	0.999957	0.300943	0.383597		ENSDARG00000004948.6	BRCA2 and CDKN1A interacting protein	ZDB-GENE-050320-39	—	—	protein_coding	ensembl	ENSDART00000016635.6	ENSDART00000016635
ENSDARG00000004952		NNN	0.313284	0.982091	0.313284	0.602769		ENSDARG00000004952.8	radical S-adenosyl methionine domain containing 2	ZDB-GENE-050913-129	rsad2	ZDB-GENE-050913-129	protein_coding	ensembl_havana_gene	ENSDART00000019617.8	ENSDART00000019617
ENSDARG00000004953		NNN	0.0240786	0.0257944	0.0572535	0.0240786		ENSDARG00000004953.10	myxovirus (influenza) resistance B	ZDB-GENE-030721-6	mxb	ZDB-GENE-030721-6	protein_coding	ensembl_havana_gene	ENSDART00000110696.3	ENSDART00000009315^ENSDART00000012627^ENSDART00000110696^ENSDART00000131454
ENSDARG00000004954		NNN	0.746846	0.746846	0.79578	0.891453		ENSDARG00000004954.12	granulin a	ZDB-GENE-030131-8434	grna	ZDB-GENE-030131-8434	protein_coding	ensembl_havana_gene	ENSDART00000137973.3	ENSDART00000103523^ENSDART00000137973^ENSDART00000147732^ENSDART00000151083^ENSDART00000151275^ENSDART00000151525^ENSDART00000151655^ENSDART00000151814
ENSDARG00000004956		NNN	0.715051	0.852829	0.759045	0.715051		ENSDARG00000004956.7	zinc finger, matrin-type 2	ZDB-GENE-030131-3197	zmat2	DKEY-8F23.1;ZDB-GENE-030131-3197	protein_coding	ensembl_havana_gene	ENSDART00000007412.7	ENSDART00000007412
ENSDARG00000004964		NNN	0.995786	0.99985	0.995786	0.998549		ENSDARG00000004964.10	cytochrome P450, family 4, subfamily T, polypeptide 8	ZDB-GENE-031219-3	cyp4	ZDB-GENE-031219-3	protein_coding	ensembl_havana_gene	ENSDART00000131949.2	ENSDART00000076955^ENSDART00000131949^ENSDART00000138614
ENSDARG00000004979		NNN	0.907347	0.995113	0.973168	0.907347		ENSDARG00000004979.6	ELOVL fatty acid elongase 5	ZDB-GENE-040407-2	elovl5	—	protein_coding	ensembl_havana_gene	ENSDART00000006990.6	ENSDART00000006990^ENSDART00000166456^ENSDART00000168595^ENSDART00000172535
ENSDARG00000004988		NNN	0.987971	0.987971	1	1		ENSDARG00000004988.11	protein phosphatase 3, catalytic subunit, alpha isozyme	ZDB-GENE-091113-24	DKEYP-79C2.2	—	protein_coding	ensembl_havana_gene	ENSDART00000005929.9	ENSDART00000005929^ENSDART00000144331
ENSDARG00000005002		NNN	0.887887	0.99683	0.994394	0.887887		ENSDARG00000005002.7	BRF1, RNA polymerase III transcription initiation factor b	ZDB-GENE-030131-6248	brf1b	ZDB-GENE-030131-6248	protein_coding	ensembl_havana_gene	ENSDART00000035827.6	ENSDART00000035827^ENSDART00000131907^ENSDART00000181195
ENSDARG00000005004		NGN	0.0526421	0.215224	0.447723	0.0526421		ENSDARG00000005004.10	solute carrier family 5 (sodium/monocarboxylate cotransporter), member 12	ZDB-GENE-040426-1343	slc5a12	ZDB-GENE-040426-1343	protein_coding	ensembl_havana_gene	ENSDART00000156782.3	ENSDART00000009271^ENSDART00000156782
ENSDARG00000005010		NNN	0.329174	0.914907	0.660228	0.329174		ENSDARG00000005010.11	si:dkeyp-2e4.8	ZDB-GENE-061207-81	DKEYP-2E4.8	—	protein_coding	havana	ENSDART00000131673.2	ENSDART00000131673
ENSDARG00000005015		NNN	0.997365	0.997365	0.999138	0.999798		ENSDARG00000005015.9	testis specific protein, Y-linked	ZDB-GENE-030131-9158	CH211-167B20.6	ZDB-GENE-030131-9158	protein_coding	ensembl_havana_gene	ENSDART00000007482.9	ENSDART00000007482
ENSDARG00000005023		SBB	0.988601	0.988601	0.999923	0.999809		ENSDARG00000005023.10	FK506 binding protein 9	ZDB-GENE-040801-23	fkbp9	ZDB-GENE-040801-23	protein_coding	ensembl_havana_gene	ENSDART00000004392.8	ENSDART00000004392^ENSDART00000151291
ENSDARG00000005026		NNN	0.495171	0.495171	0.84771	0.981933		ENSDARG00000005026.10	teashirt zinc finger homeobox 1	ZDB-GENE-030820-3	tshz1	ZDB-GENE-030820-3	protein_coding	ensembl_havana_gene	ENSDART00000186194.1	ENSDART00000024639^ENSDART00000122002^ENSDART00000186194
ENSDARG00000005034		NNN	0.171419	0.924586	0.25407	0.171419		ENSDARG00000005034.8	isoprenoid synthase domain containing	ZDB-GENE-061110-16	CH73-144M15.1	—	protein_coding	ensembl_havana_gene	ENSDART00000003192.7	ENSDART00000003192^ENSDART00000140882
ENSDARG00000005049		NNN	0.059711	0.953704	0.271878	0.059711		ENSDARG00000005049.10	RAB20, member RAS oncogene family	ZDB-GENE-030131-9143	DKEY-120M4.1	ZDB-GENE-030131-9143	protein_coding	ensembl_havana_gene	ENSDART00000138527.2	ENSDART00000138527^ENSDART00000144673
ENSDARG00000005050		NNN	0.122886	0.502066	0.734616	0.122886		ENSDARG00000005050.8	wingless-type MMTV integration site family, member 2Ba	ZDB-GENE-030717-2	wnt2ba	ZDB-GENE-030717-2	protein_coding	ensembl_havana_gene	ENSDART00000103433.4	ENSDART00000103433
ENSDARG00000005057		NNN	0.0942106	0.978097	0.146243	0.0942106		ENSDARG00000005057.10	DIM1 dimethyladenosine transferase 1-like (S. cerevisiae)	ZDB-GENE-040801-75	DKEY-186M8.2	ZDB-GENE-040801-75	protein_coding	ensembl_havana_gene	ENSDART00000050228.7	ENSDART00000050228^ENSDART00000140531
ENSDARG00000005058		NNN	0.54233	0.998409	0.889977	0.54233		ENSDARG00000005058.11	non-SMC condensin I complex, subunit D2	ZDB-GENE-050506-59	DKEY-175G20.1	—	protein_coding	ensembl_havana_gene	ENSDART00000113351.5	ENSDART00000113351^ENSDART00000137097^ENSDART00000169310
ENSDARG00000005078		NNN	0.764805	0.764805	0.964544	0.972649		ENSDARG00000005078.10	eukaryotic translation initiation factor 4E family member 3	ZDB-GENE-040912-156	eif4e3	ZDB-GENE-040912-156	protein_coding	ensembl_havana_gene	ENSDART00000013768.10	ENSDART00000013768^ENSDART00000140745
ENSDARG00000005085		NNN	0.987636	1	0.987636	0.999295		ENSDARG00000005085.11	gamma-glutamylcyclotransferase b	ZDB-GENE-040426-1939	—	—	protein_coding	ensembl	ENSDART00000014098.11	ENSDART00000014098
ENSDARG00000005092		NNG	0.0406976	0.291122	0.0406976	0.417711		ENSDARG00000005092.12	centrosomal protein 89	ZDB-GENE-040426-1210	cep89	ZDB-GENE-040426-1210	protein_coding	ensembl_havana_gene	ENSDART00000138669.3	ENSDART00000138669^ENSDART00000173467^ENSDART00000173616
ENSDARG00000005095		NNN	0.98687	0.98687	0.999909	1		ENSDARG00000005095.8	glucuronic acid epimerase a	ZDB-GENE-040630-9	glcea	ZDB-GENE-040630-9	protein_coding	ensembl_havana_gene	ENSDART00000014274.8	ENSDART00000014274^ENSDART00000183309
ENSDARG00000005098		NNN	0.211237	0.992508	0.527012	0.211237		ENSDARG00000005098.8	zgc:86764	ZDB-GENE-040718-435	CH211-108A2.1	ZDB-GENE-040718-435	protein_coding	ensembl_havana_gene	ENSDART00000135472.2	ENSDART00000135472^ENSDART00000188497
ENSDARG00000005104		NGB	0.0238196	0.241827	0.0238196	0.991119		ENSDARG00000005104.11	LIM domain kinase 2	ZDB-GENE-040718-398	CH211-225B11.2	ZDB-GENE-040718-398	protein_coding	ensembl_havana_gene	ENSDART00000093185.4	ENSDART00000093185^ENSDART00000139260^ENSDART00000142894
ENSDARG00000005108		SGG	0.481135	0.999797	0.481135	0.614435		ENSDARG00000005108.8	occludin a	ZDB-GENE-040426-2685	ocln	—	protein_coding	ensembl_havana_gene	ENSDART00000002622.7	ENSDART00000002622^ENSDART00000188698
ENSDARG00000005112		NNN	0.0509361	0.994211	0.997839	0.0509361		ENSDARG00000005112.8	cadherin 17, LI cadherin (liver-intestine)	ZDB-GENE-030910-3	cdh17	ZDB-GENE-030910-3	protein_coding	ensembl_havana_gene	ENSDART00000042895.6	ENSDART00000042895^ENSDART00000123187^ENSDART00000188870
ENSDARG00000005115		NNN	0.0906876	0.194456	0.0906876	0.107711		ENSDARG00000005115.10	calumenin b	ZDB-GENE-040426-1251	calub	ZDB-GENE-040426-1251	protein_coding	ensembl_havana_gene	ENSDART00000005405.8	ENSDART00000005405^ENSDART00000127138^ENSDART00000148485
ENSDARG00000005122		NNN	0.205604	0.884561	0.205604	0.613596		ENSDARG00000005122.11	ATPase sarcoplasmic/endoplasmic reticulum Ca2+ transporting 2a	ZDB-GENE-040426-702	DKEY-83D9.6	DKEY-83D9.6-check	protein_coding	ensembl_havana_gene	ENSDART00000047201.6	ENSDART00000047201^ENSDART00000161650^ENSDART00000167298
ENSDARG00000005126		NNN	0.980696	0.980696	0.99698	0.998172		ENSDARG00000005126.9	LARGE xylosyl- and glucuronyltransferase 1	ZDB-GENE-061204-1	—	—	protein_coding	ensembl	ENSDART00000157935.3	ENSDART00000157935^ENSDART00000193576
ENSDARG00000005128		NNN	0.28665	0.999938	0.71802	0.28665		ENSDARG00000005128.9	ribonuclease H2, subunit B	ZDB-GENE-040426-1090	rnaseh2b	ZDB-GENE-040426-1090	protein_coding	ensembl_havana_gene	ENSDART00000015377.7	ENSDART00000015377^ENSDART00000123160^ENSDART00000145042
ENSDARG00000005134		NNN	0.236537	0.952255	0.312948	0.236537		ENSDARG00000005134.9	proteasome 26S subunit, non-ATPase 11b	ZDB-GENE-030131-984	psmd11b	ZDB-GENE-030131-984	protein_coding	ensembl_havana_gene	ENSDART00000016283.9	ENSDART00000016283^ENSDART00000164156
ENSDARG00000005139		NNN	0.784517	0.947703	0.784517	0.958461		ENSDARG00000005139.11	hedgehog acyltransferase like, b	ZDB-GENE-050506-130	DKEY-276I5.2	—	protein_coding	ensembl_havana_gene	ENSDART00000131677.2	ENSDART00000131677
ENSDARG00000005141		NNN	0.894636	0.894636	0.999993	1		ENSDARG00000005141.9	CaM kinase-like vesicle-associated b	ZDB-GENE-040426-1140	camkvb	ZDB-GENE-040426-1140	protein_coding	ensembl_havana_gene	ENSDART00000125766.3	ENSDART00000125766
ENSDARG00000005150		NNN	0.923261	0.923261	0.996123	0.969364		ENSDARG00000005150.10	T-box 20	ZDB-GENE-000427-7	tbx20	ZDB-GENE-000427-7	protein_coding	ensembl_havana_gene	ENSDART00000017185.8	ENSDART00000017185
ENSDARG00000005154		NNN	0.352695	0.840131	0.763561	0.352695		ENSDARG00000005154.10	aspartoacylase	ZDB-GENE-080204-11	aspa	ZDB-GENE-080204-11	protein_coding	ensembl_havana_gene	ENSDART00000074117.6	ENSDART00000074117^ENSDART00000148381
ENSDARG00000005159		NNN	0.161175	0.161175	0.33268	0.996373		ENSDARG00000005159.11	cytohesin 1a	ZDB-GENE-030131-657	CH211-63E8.1	—	protein_coding	ensembl_havana_gene	ENSDART00000125439.3	ENSDART00000050576^ENSDART00000125439^ENSDART00000156553^ENSDART00000181743^ENSDART00000184874
ENSDARG00000005162		SGG	0.48599	0.999323	0.697134	0.48599		ENSDARG00000005162.11	tropomyosin 3	ZDB-GENE-030826-16	tpm3	ZDB-GENE-030826-16	protein_coding	ensembl_havana_gene	ENSDART00000151375.3	ENSDART00000010997^ENSDART00000027598^ENSDART00000137865^ENSDART00000151375^ENSDART00000183745^ENSDART00000188025
ENSDARG00000005163		SGG	0.462254	0.998766	0.920136	0.462254		ENSDARG00000005163.11	EFR3 homolog A (S. cerevisiae)	ZDB-GENE-040426-1681	—	—	protein_coding	ensembl	ENSDART00000171393.2	ENSDART00000036979^ENSDART00000171393
ENSDARG00000005172		NNN	0.0642742	0.698113	0.0642742	0.242507		ENSDARG00000005172.5	dynein, light chain, LC8-type 2b	ZDB-GENE-050320-132	dnl2l	ZDB-GENE-050320-132	protein_coding	ensembl_havana_gene	ENSDART00000020174.5	ENSDART00000020174
ENSDARG00000005176		NNN	0.94619	0.998337	0.999182	0.94619		ENSDARG00000005176.7	zgc:101040	ZDB-GENE-040801-107	CH211-278N20.7	—	protein_coding	ensembl_havana_gene	ENSDART00000134177.2	ENSDART00000134177
ENSDARG00000005179		NNN	0.991391	0.991391	0.996841	0.999767		ENSDARG00000005179.12	D-glutamate cyclase	ZDB-GENE-070725-6	c14orf159	ZDB-GENE-070725-6	protein_coding	ensembl_havana_gene	ENSDART00000062067.8	ENSDART00000062067^ENSDART00000124041^ENSDART00000135560^ENSDART00000136921^ENSDART00000168182
ENSDARG00000005185		NBN	0.437605	1	0.992703	0.437605		ENSDARG00000005185.10	carboxypeptidase N, polypeptide 1	ZDB-GENE-030131-9116	cpn1	ZDB-GENE-030131-9116	protein_coding	ensembl_havana_gene	ENSDART00000124439.3	ENSDART00000124439^ENSDART00000139444^ENSDART00000144422
ENSDARG00000005186		NNN	0.870382	0.870382	0.999971	1		ENSDARG00000005186.12	sp4 transcription factor	ZDB-GENE-031202-3	sp4	ZDB-GENE-031202-3	protein_coding	ensembl_havana_gene	ENSDART00000097528.6	ENSDART00000097528^ENSDART00000148527^ENSDART00000186630
ENSDARG00000005191		NGG	0.480344	1	0.480344	0.919893		ENSDARG00000005191.9	adenosylhomocysteinase	ZDB-GENE-031219-6	ahcy	—	protein_coding	ensembl_havana_gene	ENSDART00000018523.9	ENSDART00000018523
ENSDARG00000005210		SGG	0.873774	1	0.882515	0.873774		ENSDARG00000005210.12	coronin, actin binding protein, 2A	ZDB-GENE-030131-2258	coro2a	ZDB-GENE-030131-2258	protein_coding	ensembl_havana_gene	ENSDART00000011645.11	ENSDART00000011645^ENSDART00000152169^ENSDART00000152306^ENSDART00000152643^ENSDART00000158193^ENSDART00000182040
ENSDARG00000005216		NNN	0.918219	0.983345	0.974371	0.918219		ENSDARG00000005216.11	zgc:158328	ZDB-GENE-070112-1202	CH211-158N6.5	ZDB-GENE-070112-1202	protein_coding	ensembl_havana_gene	ENSDART00000171673.2	ENSDART00000066737^ENSDART00000155809^ENSDART00000157182^ENSDART00000171673
ENSDARG00000005218		NNN	0.576398	0.996956	0.61338	0.576398		ENSDARG00000005218.7	Werner helicase interacting protein 1	ZDB-GENE-040426-2415	wrnip1	ZDB-GENE-040426-2415	protein_coding	ensembl_havana_gene	ENSDART00000004848.7	ENSDART00000004848
ENSDARG00000005220		SGG	0.0750643	0.998881	0.277921	0.0750643		ENSDARG00000005220.6	programmed cell death 6	ZDB-GENE-040426-1307	pdcd6	ZDB-GENE-040426-1307	protein_coding	ensembl_havana_gene	ENSDART00000015517.6	ENSDART00000015517
ENSDARG00000005221		NNN	0.974403	0.975936	0.974403	0.999921		ENSDARG00000005221.8	desmin b	ZDB-GENE-061027-102	desmb	ZDB-GENE-061027-102	protein_coding	ensembl_havana_gene	ENSDART00000065356.6	ENSDART00000065356^ENSDART00000153465^ENSDART00000156731
ENSDARG00000005230		NGN	0.0396147	0.288907	0.597519	0.0396147		ENSDARG00000005230.13	signal sequence receptor, beta	ZDB-GENE-010413-1	ssr2	ZDB-GENE-010413-1	protein_coding	ensembl_havana_gene	ENSDART00000149169.3	ENSDART00000148697^ENSDART00000149169^ENSDART00000163921
ENSDARG00000005232		NNN	0.91853	0.91853	0.999999	1		ENSDARG00000005232.11	coiled-coil domain containing 85C, a	ZDB-GENE-060825-198	ccdc85ca	ZDB-GENE-060825-198	protein_coding	ensembl_havana_gene	ENSDART00000104999.5	ENSDART00000104999^ENSDART00000151896^ENSDART00000152045
ENSDARG00000005236		NNN	0.950225	0.950225	0.985995	0.982696		ENSDARG00000005236.11	Snf2-related CREBBP activator protein	ZDB-GENE-041008-127	srcap	ZDB-GENE-041008-127	protein_coding	ensembl_havana_gene	ENSDART00000153426.2	ENSDART00000153426^ENSDART00000188634
ENSDARG00000005246		NNN	0.989578	0.989578	0.99679	0.995562		ENSDARG00000005246.7	ankyrin repeat and SOCS box containing 3	ZDB-GENE-030131-6142	asb3	ZDB-GENE-030131-6142	protein_coding	ensembl_havana_gene	ENSDART00000021298.5	ENSDART00000021298
ENSDARG00000005251		NNN	0.182887	0.987988	0.182887	0.255388		ENSDARG00000005251.10	ribulose-5-phosphate-3-epimerase	ZDB-GENE-030131-6837	rpe	ZDB-GENE-030131-6837	protein_coding	ensembl_havana_gene	ENSDART00000021218.10	ENSDART00000021218^ENSDART00000140104^ENSDART00000144163
ENSDARG00000005254		NGG	0.118026	0.118026	0.889241	0.682196		ENSDARG00000005254.7	KDEL (Lys-Asp-Glu-Leu) endoplasmic reticulum protein retention receptor 2a	ZDB-GENE-030826-32	kdelr2	—	protein_coding	ensembl_havana_gene	ENSDART00000027630.6	ENSDART00000027630^ENSDART00000132801
ENSDARG00000005271		NGG	0.0927149	0.0927149	0.16701	0.313744		ENSDARG00000005271.9	zinc finger CCCH-type containing 12A	ZDB-GENE-110411-6	CH211-175F12.1	—	protein_coding	ensembl_havana_gene	ENSDART00000149295.2	ENSDART00000149295
ENSDARG00000005274		NNG	0.0411119	0.900227	0.0411119	0.0541476		ENSDARG00000005274.9	RAD52 homolog, DNA repair protein	ZDB-GENE-050731-10	rad52	ZDB-GENE-050731-10	protein_coding	ensembl_havana_gene	ENSDART00000079012.6	ENSDART00000017488^ENSDART00000079012^ENSDART00000149733
ENSDARG00000005284		NNN	0.700935	0.794195	0.700935	0.971457		ENSDARG00000005284.10	F-box and leucine-rich repeat protein 15	ZDB-GENE-040426-2440	fbxl15	ZDB-GENE-040426-2440	protein_coding	ensembl_havana_gene	ENSDART00000124455.3	ENSDART00000124455
ENSDARG00000005314		NNN	0.039518	0.532596	0.039518	0.107921		ENSDARG00000005314.8	si:dkeyp-80c12.5	ZDB-GENE-090312-195	DKEYP-80C12.5	ZDB-GENE-090312-195	protein_coding	ensembl_havana_gene	ENSDART00000187294.1	ENSDART00000132171^ENSDART00000187294
ENSDARG00000005315		NNN	0.194981	0.649615	0.194981	0.379014		ENSDARG00000005315.13	cugbp, Elav-like family member 1	ZDB-GENE-000501-1	celf1	ZDB-GENE-000501-1	protein_coding	ensembl_havana_gene	ENSDART00000041055.9	ENSDART00000041055^ENSDART00000134570^ENSDART00000139187^ENSDART00000143815
ENSDARG00000005318		NGG	0.114592	0.114592	0.819065	0.607668		ENSDARG00000005318.11	signal transducing adaptor molecule (SH3 domain and ITAM motif) 2	ZDB-GENE-041114-64	stam2	ZDB-GENE-041114-64	protein_coding	ensembl_havana_gene	ENSDART00000022574.9	ENSDART00000022574
ENSDARG00000005320		NNN	0.7812	0.849007	0.7812	0.996671		ENSDARG00000005320.9	nipsnap homolog 1 (C. elegans)	ZDB-GENE-991008-17	nipsnap1	ZDB-GENE-991008-17	protein_coding	ensembl_havana_gene	ENSDART00000026749.9	ENSDART00000026749
ENSDARG00000005327		NNN	0.554565	0.970868	0.554565	0.930401		ENSDARG00000005327.14	finTRIM family, member 66	ZDB-GENE-070912-661	DKEYP-66D1.6	—	protein_coding	ensembl_havana_gene	ENSDART00000156530.2	ENSDART00000156530
ENSDARG00000005332		NNN	0.753669	0.753669	0.944792	0.999999		ENSDARG00000005332.10	lipase, member Ib	ZDB-GENE-091118-47	CH211-80N22.7	—	protein_coding	ensembl_havana_gene	ENSDART00000002953.8	ENSDART00000002953^ENSDART00000145092
ENSDARG00000005335		NNN	0.419447	0.419447	0.971577	0.735274		ENSDARG00000005335.9	solute carrier family 22 (organic cation/zwitterion transporter), member 4	ZDB-GENE-040426-1517	CH1073-409B12.3	ZDB-GENE-040426-1517	protein_coding	ensembl_havana_gene	ENSDART00000024342.8	ENSDART00000024342^ENSDART00000138828^ENSDART00000145081
ENSDARG00000005343		NNN	0.765673	0.765673	0.999643	0.999994		ENSDARG00000005343.11	coiled-coil domain containing 85A, like	ZDB-GENE-040912-92	DKEY-277E10.1	ZDB-GENE-040912-92	protein_coding	ensembl_havana_gene	ENSDART00000141126.3	ENSDART00000106610^ENSDART00000141126
ENSDARG00000005350		NBN	0.0285743	0.817331	0.964871	0.0285743		ENSDARG00000005350.11	disco-interacting protein 2 homolog Ba	ZDB-GENE-040426-2305	DKEY-9P24.3	ZDB-GENE-040426-2305	protein_coding	ensembl_havana_gene	ENSDART00000019521.11	ENSDART00000019521
ENSDARG00000005355		SGG	0.485291	1	0.485291	0.910509		ENSDARG00000005355.12	La ribonucleoprotein domain family, member 6a	ZDB-GENE-030131-6403	ZFOS-508H5.1	ZDB-GENE-030131-6403	protein_coding	ensembl_havana_gene	ENSDART00000185918.1	ENSDART00000140897^ENSDART00000185918
ENSDARG00000005356		NGB	0.0661577	0.783866	0.0661577	0.997727		ENSDARG00000005356.11	TYRO3 protein tyrosine kinase	ZDB-GENE-990714-13	tyro3	ZDB-GENE-990714-13	protein_coding	ensembl_havana_gene	ENSDART00000140391.3	ENSDART00000140391
ENSDARG00000005359		NNN	0.62842	0.980616	0.62842	0.788464		ENSDARG00000005359.9	succinate-CoA ligase, ADP-forming, beta subunit	ZDB-GENE-040426-1963	sucla2	ZDB-GENE-040426-1963	protein_coding	ensembl_havana_gene	ENSDART00000018503.9	ENSDART00000018503^ENSDART00000149537
ENSDARG00000005364		SBB	0.991679	0.996236	0.999877	0.991679		ENSDARG00000005364.9	glutamate receptor, ionotropic, N-methyl-D-aspartate 3Ba	ZDB-GENE-070912-354	DKEY-119N4.1	—	protein_coding	ensembl_havana_gene	ENSDART00000058111.6	ENSDART00000058111
ENSDARG00000005368		NNN	0.999817	1	0.999817	0.999898		ENSDARG00000005368.11	melanoma cell adhesion molecule b	ZDB-GENE-030219-213	mcam	ZDB-GENE-030219-213	protein_coding	ensembl_havana_gene	ENSDART00000020425.9	ENSDART00000020425
ENSDARG00000005371		NGG	0.100181	0.100181	0.137735	0.430375		ENSDARG00000005371.10	G protein-coupled receptor, class C, group 6, member A	ZDB-GENE-041217-22	gpr6a	ZDB-GENE-041217-22	protein_coding	ensembl_havana_gene	ENSDART00000008880.9	ENSDART00000008880
ENSDARG00000005372		NNN	0.834281	0.834281	0.935537	0.992807		ENSDARG00000005372.9	calcium/calmodulin-dependent protein kinase IV	ZDB-GENE-050417-76	CH211-220B11.5	ZDB-GENE-050417-76	protein_coding	ensembl_havana_gene	ENSDART00000130891.3	ENSDART00000130891^ENSDART00000183503
ENSDARG00000005374		NNN	0.985564	0.985564	0.996115	0.99984		ENSDARG00000005374.9	tubulin, gamma complex associated protein 4	ZDB-GENE-081022-124	tubgcp4	ZDB-GENE-081022-124	protein_coding	ensembl_havana_gene	ENSDART00000174289.2	ENSDART00000009649^ENSDART00000174289^ENSDART00000174329
ENSDARG00000005382		NNN	0.875125	0.933916	0.93298	0.875125		ENSDARG00000005382.12	PR domain containing 9	ZDB-GENE-040426-1319	prdm9	ZDB-GENE-040426-1319	protein_coding	ensembl_havana_gene	ENSDART00000027321.10	ENSDART00000027321^ENSDART00000149344
ENSDARG00000005392		NNN	0.120835	0.654456	0.672763	0.120835		ENSDARG00000005392.11	solute carrier family 5 (sodium/iodide cotransporter), member 5	ZDB-GENE-060503-585	slc5a5	ZDB-GENE-060503-585	protein_coding	ensembl_havana_gene	ENSDART00000159760.2	ENSDART00000114699^ENSDART00000159760
ENSDARG00000005394		NNN	0.96665	0.96665	0.999999	1		ENSDARG00000005394.12	DNA (cytosine-5-)-methyltransferase 3 alpha a	ZDB-GENE-050314-5	dnmt3aa	ZDB-GENE-050314-5	protein_coding	ensembl_havana_gene	ENSDART00000100320.6	ENSDART00000100320^ENSDART00000153330
ENSDARG00000005397		NNN	0.76775	0.76775	0.991132	0.999997		ENSDARG00000005397.11	tripartite motif containing 3b	ZDB-GENE-070112-1132	CH211-210L19.2	ZDB-GENE-070112-1132	protein_coding	ensembl_havana_gene	ENSDART00000136472.3	ENSDART00000136291^ENSDART00000136472^ENSDART00000143734^ENSDART00000174797
ENSDARG00000005414		NNN	0.965386	0.99508	0.965941	0.965386		ENSDARG00000005414.9	GRB2-related adaptor protein a	ZDB-GENE-050522-347	grap	ZDB-GENE-050522-347	protein_coding	ensembl_havana_gene	ENSDART00000055171.6	ENSDART00000055171
ENSDARG00000005416		NNN	0.0447311	0.377986	0.196496	0.0447311		ENSDARG00000005416.12	mitogen-activated protein kinase kinase kinase 5	ZDB-GENE-030827-3	map3k5	ZDB-GENE-030827-3	protein_coding	ensembl_havana_gene	ENSDART00000046641.9	ENSDART00000046641^ENSDART00000152278^ENSDART00000152461^ENSDART00000152495
ENSDARG00000005423		NNN	0.420416	0.521687	0.420416	0.997956		ENSDARG00000005423.10	phosphoglycerate mutase 1a	ZDB-GENE-030131-1827	pgam1	ZDB-GENE-030131-1827	protein_coding	ensembl_havana_gene	ENSDART00000008287.8	ENSDART00000008287^ENSDART00000145300
ENSDARG00000005425		NNN	0.707146	0.957894	0.798349	0.707146		ENSDARG00000005425.9	WD repeat and FYVE domain containing 1	ZDB-GENE-041024-4	wdfy1	ZDB-GENE-041024-4	protein_coding	ensembl_havana_gene	ENSDART00000027019.8	ENSDART00000027019^ENSDART00000154672
ENSDARG00000005448		NNN	0.113151	0.945755	0.113151	0.494791		ENSDARG00000005448.11	mitochondrial methionyl-tRNA formyltransferase	ZDB-GENE-060929-120	mtfmt	ZDB-GENE-060929-120	protein_coding	ensembl_havana_gene	ENSDART00000053814.8	ENSDART00000053814
ENSDARG00000005451		NNN	0.0423697	0.599267	0.0423697	0.171807		ENSDARG00000005451.5	GDP dissociation inhibitor 2	ZDB-GENE-030131-2485	gdi2	ZDB-GENE-030131-2485	protein_coding	ensembl_havana_gene	ENSDART00000008584.5	ENSDART00000008584
ENSDARG00000005453		NNN	0.713358	0.713358	0.999085	0.994046		ENSDARG00000005453.11	forkhead box P2	ZDB-GENE-041203-2	foxp2	ZDB-GENE-041203-2	protein_coding	ensembl_havana_gene	ENSDART00000060861.6	ENSDART00000060861^ENSDART00000134820^ENSDART00000136572^ENSDART00000138367^ENSDART00000142087^ENSDART00000150774
ENSDARG00000005454		NNN	0.162799	0.984032	0.6796	0.162799		ENSDARG00000005454.9	transforming, acidic coiled-coil containing protein 3	ZDB-GENE-050522-327	tacc3	ZDB-GENE-050522-327	protein_coding	ensembl_havana_gene	ENSDART00000002750.9	ENSDART00000002750^ENSDART00000122810^ENSDART00000145884^ENSDART00000162399
ENSDARG00000005456		NNN	0.325738	0.984204	0.868842	0.325738		ENSDARG00000005456.12	katanin p80 (WD repeat containing) subunit B 1	ZDB-GENE-040426-1954	katnb1	ZDB-GENE-040426-1954	protein_coding	ensembl_havana_gene	ENSDART00000014632.10	ENSDART00000014632^ENSDART00000174042^ENSDART00000174099^ENSDART00000174228^ENSDART00000174255^ENSDART00000174389
ENSDARG00000005458		NNN	0.481935	0.920699	0.481935	0.697676		ENSDARG00000005458.13	casein kinase 1, gamma 2a	ZDB-GENE-030131-6445	csnk1g2	ZDB-GENE-030131-6445	protein_coding	ensembl_havana_gene	ENSDART00000056921.8	ENSDART00000056921^ENSDART00000153745^ENSDART00000170669
ENSDARG00000005462		NNN	0.657454	0.999596	0.977788	0.657454		ENSDARG00000005462.9	kinesin family member 4	ZDB-GENE-040426-1545	CH1073-167D14.2	ZDB-GENE-040426-1545	protein_coding	ensembl_havana_gene	ENSDART00000026178.8	ENSDART00000026178^ENSDART00000151139^ENSDART00000188534
ENSDARG00000005463		NNN	0.325411	0.592293	0.325411	0.834313		ENSDARG00000005463.6	solute carrier family 30 (zinc transporter), member 1a	ZDB-GENE-040426-1840	slc30a1a	ZDB-GENE-040426-1840	protein_coding	ensembl_havana_gene	ENSDART00000007744.5	ENSDART00000007744
ENSDARG00000005464		NGG	0.0481397	0.82187	0.0481397	0.506812		ENSDARG00000005464.9	deoxyribonuclease I-like 1	ZDB-GENE-040426-2170	dnase1l3	ZDB-GENE-040426-2170	protein_coding	ensembl_havana_gene	ENSDART00000104425.4	ENSDART00000104425
ENSDARG00000005468		NGG	0.0218197	0.803973	0.0218197	0.0491375		ENSDARG00000005468.9	interferon regulatory factor 2 binding protein 1	ZDB-GENE-050420-389	DKEY-223N17.3	—	protein_coding	ensembl_havana_gene	ENSDART00000018163.9	ENSDART00000018163
ENSDARG00000005476		NNN	0.0694663	0.0694663	0.97922	0.935265		ENSDARG00000005476.10	neuron navigator 3	ZDB-GENE-021205-1	DKEYP-60G2.1	—	protein_coding	ensembl_havana_gene	ENSDART00000005847.9	ENSDART00000005847^ENSDART00000036886^ENSDART00000143674
ENSDARG00000005479		NNN	0.999985	0.999985	1	1		ENSDARG00000005479.13	teneurin transmembrane protein 3	ZDB-GENE-990714-19	odz3	ZDB-GENE-990714-19	protein_coding	ensembl_havana_gene	ENSDART00000084891.7	ENSDART00000084891^ENSDART00000122700^ENSDART00000132970^ENSDART00000137676^ENSDART00000144455^ENSDART00000148701^ENSDART00000181790
ENSDARG00000005481		SGG	0.469065	0.999997	0.469065	0.473913		ENSDARG00000005481.10	nuclear factor of kappa light polypeptide gene enhancer in B-cells inhibitor, alpha a	ZDB-GENE-040426-2227	nfkbiaa	ZDB-GENE-040426-2227	protein_coding	ensembl_havana_gene	ENSDART00000130107.4	ENSDART00000013798^ENSDART00000130107^ENSDART00000146625
ENSDARG00000005482		NNN	0.131425	0.131425	0.999996	1		ENSDARG00000005482.9	Rap guanine nucleotide exchange factor (GEF) 2	ZDB-GENE-030131-6959	rapgef2	ZDB-GENE-030131-6959	protein_coding	ensembl_havana_gene	ENSDART00000193115.1	ENSDART00000003826^ENSDART00000157785^ENSDART00000159348^ENSDART00000166827^ENSDART00000169300^ENSDART00000180973^ENSDART00000183432^ENSDART00000188036^ENSDART00000188772^ENSDART00000192796^ENSDART00000193115
ENSDARG00000005485		NNN	0.159139	0.705473	0.159139	0.563295		ENSDARG00000005485.8	upper zone of growth plate and cartilage matrix associated b	ZDB-GENE-040426-2368	ucmab	ZDB-GENE-040426-2368	protein_coding	ensembl_havana_gene	ENSDART00000171904.2	ENSDART00000003665^ENSDART00000164346^ENSDART00000171904
ENSDARG00000005500		NNN	0.851906	0.985483	0.851906	0.900425		ENSDARG00000005500.9	DiGeorge syndrome critical region gene 6	ZDB-GENE-040912-125	CH73-39K22.1	ZDB-GENE-040912-125	protein_coding	ensembl_havana_gene	ENSDART00000026747.9	ENSDART00000026747^ENSDART00000159705^ENSDART00000161665^ENSDART00000166455^ENSDART00000192487
ENSDARG00000005510		NNN	0.886076	0.999953	0.999834	0.886076		ENSDARG00000005510.10	growth differentiation factor 6b	ZDB-GENE-980526-442	gdf6b	ZDB-GENE-980526-442	protein_coding	ensembl_havana_gene	ENSDART00000151090.4	ENSDART00000151090
ENSDARG00000005513		NNG	0.0304886	0.97517	0.0304886	0.69136		ENSDARG00000005513.8	nascent polypeptide-associated complex alpha subunit	ZDB-GENE-020423-4	naca	ZDB-GENE-020423-4	protein_coding	ensembl_havana_gene	ENSDART00000014723.7	ENSDART00000014723^ENSDART00000140302^ENSDART00000144800^ENSDART00000162822^ENSDART00000181009
ENSDARG00000005518		NNN	0.995802	0.998313	0.999927	0.995802		ENSDARG00000005518.9	solute carrier family 5 (sodium/sugar cotransporter), member 9	ZDB-GENE-080513-3	slc5a	ZDB-GENE-080513-3	protein_coding	ensembl_havana_gene	ENSDART00000024433.9	ENSDART00000024433^ENSDART00000141185
ENSDARG00000005522		NNN	0.535734	0.535734	0.995914	0.999956		ENSDARG00000005522.11	galanin receptor 1a	ZDB-GENE-060503-290	galr1	ZDB-GENE-060503-290	protein_coding	ensembl_havana_gene	ENSDART00000138544.3	ENSDART00000138544^ENSDART00000187306
ENSDARG00000005525		SGG	0.143749	0.992837	0.143749	0.30835		ENSDARG00000005525.10	aspartoacylase (aminocyclase) 3, tandem duplicate 2	ZDB-GENE-040718-37	acy3.2	ZDB-GENE-040718-37	protein_coding	ensembl_havana_gene	ENSDART00000122217.3	ENSDART00000004233^ENSDART00000122217^ENSDART00000131407^ENSDART00000136085^ENSDART00000136469^ENSDART00000139600^ENSDART00000150448
ENSDARG00000005526		NNN	0.310414	0.826965	0.511249	0.310414		ENSDARG00000005526.12	immunoglobulin-like and fibronectin type III domain containing 1, tandem duplicate 1	ZDB-GENE-050327-30	—	—	protein_coding	ensembl	ENSDART00000037875.8	ENSDART00000037875
ENSDARG00000005536		NNN	0.99652	0.999994	0.99652	0.999874		ENSDARG00000005536.6	ubiquitin protein ligase E3 component n-recognin 7	ZDB-GENE-030131-1535	ubr7	ZDB-GENE-030131-1535	protein_coding	ensembl_havana_gene	ENSDART00000024595.5	ENSDART00000024595^ENSDART00000153358
ENSDARG00000005540		NNN	0.999996	0.999996	1	1		ENSDARG00000005540.9	exportin 7	ZDB-GENE-060628-2	xpo7	ZDB-GENE-060628-2	protein_coding	ensembl_havana_gene	ENSDART00000172713.2	ENSDART00000027612^ENSDART00000145264^ENSDART00000172713
ENSDARG00000005541		NNN	0.347815	1	0.666976	0.347815		ENSDARG00000005541.5	wnt inhibitory factor 1	ZDB-GENE-990712-17	wif1	ZDB-GENE-990712-17	protein_coding	ensembl_havana_gene	ENSDART00000016382.5	ENSDART00000016382
ENSDARG00000005544		NNN	0.857853	0.857853	0.979599	0.996653		ENSDARG00000005544.11	BTB (POZ) domain containing 3a	ZDB-GENE-090312-7	btbd3	ZDB-GENE-090312-7	protein_coding	ensembl_havana_gene	ENSDART00000014970.10	ENSDART00000014970^ENSDART00000132141^ENSDART00000132244
ENSDARG00000005547		NNN	0.643424	0.832222	0.643424	0.969872		ENSDARG00000005547.8	RAD50 interactor 1	ZDB-GENE-041210-174	DKEY-202B22.4	—	protein_coding	ensembl_havana_gene	ENSDART00000045639.6	ENSDART00000045639
ENSDARG00000005549		NNN	0.891767	0.891767	0.999679	0.999792		ENSDARG00000005549.9	zinc finger protein 710b	ZDB-GENE-120503-2	CH211-107O10.10	—	protein_coding	ensembl_havana_gene	ENSDART00000173646.2	ENSDART00000173514^ENSDART00000173646^ENSDART00000182235
ENSDARG00000005551		NNN	0.96591	0.96591	0.979801	0.999903		ENSDARG00000005551.11	heterogeneous nuclear ribonucleoprotein H1, like	ZDB-GENE-030131-275	CH211-59D17.1	ZDB-GENE-030131-275	protein_coding	ensembl_havana_gene	ENSDART00000015636.9	ENSDART00000015636^ENSDART00000065447^ENSDART00000167867
ENSDARG00000005559		NNN	0.9897	0.9897	1	1		ENSDARG00000005559.10	POU class 4 homeobox 1	ZDB-GENE-000523-2	—	—	protein_coding	ensembl	ENSDART00000025031.10	ENSDART00000025031
ENSDARG00000005560		NNN	0.549815	0.549815	1	1		ENSDARG00000005560.7	tyrosine 3-monooxygenase/tryptophan 5-monooxygenase activation protein, eta polypeptide	ZDB-GENE-040426-2191	ywhah	ZDB-GENE-040426-2191	protein_coding	ensembl_havana_gene	ENSDART00000020122.7	ENSDART00000020122
ENSDARG00000005561		NNN	0.912531	0.997306	0.912531	0.990794		ENSDARG00000005561.10	G elongation factor, mitochondrial 2	ZDB-GENE-060201-3	gfm2	ZDB-GENE-060201-3	protein_coding	ensembl_havana_gene	ENSDART00000016314.10	ENSDART00000016314^ENSDART00000138672
ENSDARG00000005565		NNN	0.508885	0.739362	0.7243	0.508885		ENSDARG00000005565.10	ectonucleoside triphosphate diphosphohydrolase 8	ZDB-GENE-040724-142	entpd8	ZDB-GENE-040724-142	protein_coding	ensembl_havana_gene	ENSDART00000011245.7	ENSDART00000011245^ENSDART00000122819^ENSDART00000125659
ENSDARG00000005574		NNN	1	1	1	1		ENSDARG00000005574.10	visual system homeobox 2	ZDB-GENE-001222-1	chx10	ZDB-GENE-001222-1	protein_coding	ensembl_havana_gene	ENSDART00000030448.9	ENSDART00000030448
ENSDARG00000005576		NNN	0.990574	0.991606	0.997996	0.990574		ENSDARG00000005576.11	M-phase phosphoprotein 8	ZDB-GENE-050309-191	DKEY-19J7.1	—	protein_coding	ensembl_havana_gene	ENSDART00000080404.6	ENSDART00000080404
ENSDARG00000005578		NNN	0.916096	0.941923	0.916096	0.989777		ENSDARG00000005578.8	UDP-glucose pyrophosphorylase 2a	ZDB-GENE-090311-46	ugp2a	ZDB-GENE-090311-46	protein_coding	ensembl_havana_gene	ENSDART00000010449.8	ENSDART00000010449
ENSDARG00000005586		NNN	0.999916	0.999916	0.999996	1		ENSDARG00000005586.8	zinc finger and BTB domain containing 20	ZDB-GENE-070112-1992	DKEY-70B23.3	ZDB-GENE-070112-1992	protein_coding	ensembl_havana_gene	ENSDART00000013605.8	ENSDART00000013605^ENSDART00000133753
ENSDARG00000005590		NNN	0.926967	0.995195	0.992555	0.926967		ENSDARG00000005590.11	metal response element binding transcription factor 2	ZDB-GENE-060512-94	mtf2	ZDB-GENE-060512-94	protein_coding	ensembl_havana_gene	ENSDART00000122709.4	ENSDART00000111298^ENSDART00000122709^ENSDART00000188323^ENSDART00000190033
ENSDARG00000005593		NNN	0.998771	0.998771	1	1		ENSDARG00000005593.10	—	—	rxrga	ZDB-GENE-980526-36	processed_transcript	ensembl_havana_gene	ENSDART00000021168.9	ENSDART00000021168^ENSDART00000148400
ENSDARG00000005595		NNN	0.171456	0.999733	0.604093	0.171456		ENSDARG00000005595.10	androglobin	ZDB-GENE-041001-205	adgb	ZDB-GENE-041001-205	protein_coding	ensembl_havana_gene	ENSDART00000021575.8	ENSDART00000021575
ENSDARG00000005606		NNN	0.995447	0.99931	0.998775	0.995447		ENSDARG00000005606.10	PAX interacting (with transcription-activation domain) protein 1	ZDB-GENE-041010-214	CH211-207D6.1	ZDB-GENE-041010-214	protein_coding	ensembl_havana_gene	ENSDART00000144672.3	ENSDART00000031130^ENSDART00000144672^ENSDART00000158844
ENSDARG00000005612		NNN	0.0544826	0.864272	0.148921	0.0544826		ENSDARG00000005612.9	APH1B gamma secretase subunit	ZDB-GENE-031118-31	aph1b	ZDB-GENE-031118-31	protein_coding	ensembl_havana_gene	ENSDART00000008096.8	ENSDART00000008096^ENSDART00000145129^ENSDART00000146655
ENSDARG00000005616		NNN	0.95282	0.95282	0.998703	1		ENSDARG00000005616.11	complement component bfb	ZDB-GENE-990415-34	bfb	ZDB-GENE-990415-34	protein_coding	ensembl_havana_gene	ENSDART00000003508.9	ENSDART00000003508^ENSDART00000124221
ENSDARG00000005619		NNN	0.886952	0.988088	0.998726	0.886952		ENSDARG00000005619.9	NIMA-related kinase 2	ZDB-GENE-040426-752	nek2	ZDB-GENE-040426-752	protein_coding	ensembl_havana_gene	ENSDART00000003248.8	ENSDART00000003248^ENSDART00000152611^ENSDART00000188006
ENSDARG00000005625		NNN	0.990268	0.990268	1	1		ENSDARG00000005625.9	macoilin 1a	ZDB-GENE-040426-1097	tmem57	ZDB-GENE-040426-1097	protein_coding	ensembl_havana_gene	ENSDART00000009149.9	ENSDART00000009149^ENSDART00000142694
ENSDARG00000005626		NNN	0.661691	0.661691	0.980756	0.999749		ENSDARG00000005626.8	si:ch211-133l11.10	ZDB-GENE-141219-14	CH211-133L11.10	—	protein_coding	ensembl_havana_gene	ENSDART00000003097.8	ENSDART00000003097^ENSDART00000159344^ENSDART00000167720
ENSDARG00000005627		NNN	0.162491	0.336841	0.162491	0.229733		ENSDARG00000005627.10	zmp:0000000527	ZDB-GENE-130530-530	—	—	protein_coding	ensembl	ENSDART00000002562.9	ENSDART00000002562
ENSDARG00000005629		NNN	0.392413	0.999975	0.392413	0.737241		ENSDARG00000005629.10	SET and MYND domain containing 2b	ZDB-GENE-041001-201	smyd2b	ZDB-GENE-041001-201	protein_coding	ensembl_havana_gene	ENSDART00000028062.10	ENSDART00000028062^ENSDART00000031759^ENSDART00000152736^ENSDART00000162198
ENSDARG00000005640		NNN	0.0961853	0.935979	0.131272	0.0961853		ENSDARG00000005640.8	adenosine deaminase, tRNA-specific 3	ZDB-GENE-030616-531	DKEY-204G5.2	ZDB-GENE-030616-531	protein_coding	ensembl_havana_gene	ENSDART00000008275.8	ENSDART00000008275^ENSDART00000163164
ENSDARG00000005643		NGG	0.791201	0.957581	0.791201	0.837525		ENSDARG00000005643.7	glycine C-acetyltransferase	ZDB-GENE-060518-3	gcat	ZDB-GENE-060518-3	protein_coding	ensembl_havana_gene	ENSDART00000007398.7	ENSDART00000007398
ENSDARG00000005645		NNN	0.932091	0.932091	1	1		ENSDARG00000005645.10	roundabout, axon guidance receptor, homolog 3 (Drosophila)	ZDB-GENE-000209-4	—	—	protein_coding	ensembl	ENSDART00000186456.1	ENSDART00000023575^ENSDART00000024778^ENSDART00000186456
ENSDARG00000005648		NNN	0.967693	1	0.967693	0.970849		ENSDARG00000005648.11	olfactomedin-like 2A	ZDB-GENE-081105-107	CH211-15B7.4	—	protein_coding	ensembl_havana_gene	ENSDART00000084439.6	ENSDART00000084439
ENSDARG00000005651		NNN	0.641233	0.641233	0.999875	1		ENSDARG00000005651.11	#NAME?	ZDB-GENE-050522-466	hrasb	ZDB-GENE-050522-466	protein_coding	ensembl_havana_gene	ENSDART00000015040.11	ENSDART00000015040^ENSDART00000148113^ENSDART00000174324^ENSDART00000193674
ENSDARG00000005652		SGG	0.126347	0.986323	0.126347	0.21181		ENSDARG00000005652.10	mannosidase, alpha, class 1A, member 1	ZDB-GENE-041014-321	man1a1	ZDB-GENE-041014-321	protein_coding	ensembl_havana_gene	ENSDART00000146052.3	ENSDART00000146052
ENSDARG00000005670		NNN	0.0910487	0.0910487	1	1		ENSDARG00000005670.8	tau tubulin kinase 2a	ZDB-GENE-120928-3	CH73-374J17.4	—	protein_coding	ensembl_havana_gene	ENSDART00000016815.8	ENSDART00000016815^ENSDART00000172080^ENSDART00000185507^ENSDART00000186230
ENSDARG00000005673		SGG	0.256825	0.996741	0.256825	0.305066		ENSDARG00000005673.8	coagulation factor IIIb	ZDB-GENE-050417-234	f3b	ZDB-GENE-050417-234	protein_coding	ensembl_havana_gene	ENSDART00000027171.8	ENSDART00000027171
ENSDARG00000005675		NGN	0.123687	0.685014	0.71428	0.123687		ENSDARG00000005675.10	Sec61 translocon alpha 1 subunit, like	ZDB-GENE-021016-2	sec61al2	ZDB-GENE-021016-2	protein_coding	ensembl_havana_gene	ENSDART00000049425.7	ENSDART00000049425^ENSDART00000143910
ENSDARG00000005679		NBB	0.0585031	0.0585031	0.999999	0.999986		ENSDARG00000005679.9	thyroid hormone receptor interactor 10a	ZDB-GENE-041114-105	—	—	protein_coding	ensembl	ENSDART00000124215.3	ENSDART00000124215
ENSDARG00000005690		SNN	0.0632615	0.999994	0.0835895	0.0632615		ENSDARG00000005690.11	solute carrier family 25 (mitochondrial carrier; phosphate carrier), member 23a	ZDB-GENE-121214-154	CH211-196H16.11	—	protein_coding	ensembl_havana_gene	ENSDART00000152666.3	ENSDART00000152666
ENSDARG00000005699		NNN	0.420308	0.993443	0.420308	0.729282		ENSDARG00000005699.7	DEAD/H (Asp-Glu-Ala-Asp/His) box polypeptide 19 (DBP5 homolog, yeast)	ZDB-GENE-020419-30	ddx19	ZDB-GENE-020419-30	protein_coding	ensembl_havana_gene	ENSDART00000009788.7	ENSDART00000009788^ENSDART00000161972^ENSDART00000165329
ENSDARG00000005704		NNN	0.969689	0.975072	0.991481	0.969689		ENSDARG00000005704.9	EPS8-like 3b	ZDB-GENE-040426-1335	DKEY-183P4.4	ZDB-GENE-040426-1335	protein_coding	ensembl_havana_gene	ENSDART00000139682.2	ENSDART00000133935^ENSDART00000137242^ENSDART00000139682
ENSDARG00000005713		SPG	0.0408465	1	1	0.0408465		ENSDARG00000005713.8	ethylmalonic encephalopathy 1	ZDB-GENE-040426-2503	—	—	protein_coding	ensembl	ENSDART00000043403.6	ENSDART00000043403
ENSDARG00000005716		NNN	0.952892	0.996213	0.952892	0.999699		ENSDARG00000005716.11	olfactomedin-like 2Ba	ZDB-GENE-041014-329	olfml2ba	ZDB-GENE-041014-329	protein_coding	ensembl_havana_gene	ENSDART00000147068.2	ENSDART00000147068
ENSDARG00000005738		NNN	0.150726	0.997484	0.150726	0.500264		ENSDARG00000005738.12	ribosome production factor 1 homolog	ZDB-GENE-040625-177	DKEY-228N9.1	ZDB-GENE-040625-177	protein_coding	ensembl_havana_gene	ENSDART00000143436.3	ENSDART00000143436^ENSDART00000147115^ENSDART00000157928
ENSDARG00000005739		NNN	0.979351	0.979351	1	1		ENSDARG00000005739.9	glycoprotein M6Ba	ZDB-GENE-030710-9	gpm6ba	ZDB-GENE-030710-9	protein_coding	ensembl_havana_gene	ENSDART00000019770.8	ENSDART00000019770
ENSDARG00000005749		NNN	0.582238	0.996939	0.582238	0.903335		ENSDARG00000005749.9	cullin-associated and neddylation-dissociated 2 (putative)	ZDB-GENE-060503-645	CH211-257F16.2	—	protein_coding	ensembl_havana_gene	ENSDART00000022445.7	ENSDART00000022445^ENSDART00000182376
ENSDARG00000005754		NGG	0.126603	0.126603	0.475742	0.864255		ENSDARG00000005754.13	protein tyrosine phosphatase, receptor type, f, b	ZDB-GENE-060503-530	ptprfb	ZDB-GENE-060503-530	protein_coding	ensembl_havana_gene	ENSDART00000083314.7	ENSDART00000083314^ENSDART00000133709^ENSDART00000155124^ENSDART00000166518^ENSDART00000179791^ENSDART00000184039^ENSDART00000190089^ENSDART00000191872
ENSDARG00000005762		SGG	0.0951721	1	0.0951721	0.367874		ENSDARG00000005762.10	collagen, type XIV, alpha 1a	ZDB-GENE-030131-9889	col14a1	ZDB-GENE-030131-9889	protein_coding	ensembl_havana_gene	ENSDART00000027982.9	ENSDART00000027982^ENSDART00000134087^ENSDART00000137912^ENSDART00000138611
ENSDARG00000005772		NNN	0.553777	0.999965	0.553777	0.715991		ENSDARG00000005772.13	TSR2, 20S rRNA accumulation, homolog (S. cerevisiae)	ZDB-GENE-021231-2	tsr2	ZDB-GENE-021231-2	protein_coding	ensembl_havana_gene	ENSDART00000025214.9	ENSDART00000025214^ENSDART00000164731^ENSDART00000188259
ENSDARG00000005774		NNN	0.670615	0.952632	0.670615	0.829854		ENSDARG00000005774.9	DEAD (Asp-Glu-Ala-Asp) box helicase 3b	ZDB-GENE-980526-150	pl10	ZDB-GENE-980526-150	protein_coding	ensembl_havana_gene	ENSDART00000102148.6	ENSDART00000102148^ENSDART00000154000^ENSDART00000154647^ENSDART00000154985^ENSDART00000155884^ENSDART00000156077^ENSDART00000157012
ENSDARG00000005775		NNN	0.998604	0.998604	1	1		ENSDARG00000005775.10	sodium channel, voltage gated, type VIII, alpha subunit a	ZDB-GENE-000828-1	scn8aa	ZDB-GENE-000828-1	protein_coding	ensembl_havana_gene	ENSDART00000022042.10	ENSDART00000022042^ENSDART00000191870
ENSDARG00000005776		NNN	0.847592	0.847592	0.999899	1		ENSDARG00000005776.10	guanylate kinase 1b	ZDB-GENE-020916-1	guk1	ZDB-GENE-020916-1	protein_coding	ensembl_havana_gene	ENSDART00000022959.9	ENSDART00000022959^ENSDART00000079989^ENSDART00000147841
ENSDARG00000005780		NNN	0.989019	1	0.989019	0.999956		ENSDARG00000005780.7	neuropeptide Y receptor Y8b	ZDB-GENE-980526-208	npyryb	ZDB-GENE-980526-208	protein_coding	ensembl_havana_gene	ENSDART00000015833.7	ENSDART00000015833
ENSDARG00000005783		NNN	1	1	1	1		ENSDARG00000005783.10	neurocan b	ZDB-GENE-050208-586	CH211-123B7.1	—	protein_coding	ensembl_havana_gene	ENSDART00000191154.1	ENSDART00000005724^ENSDART00000135716^ENSDART00000141563^ENSDART00000191154
ENSDARG00000005786		NNN	0.625061	0.763635	0.73631	0.625061		ENSDARG00000005786.7	protein phosphatase, Mg2+/Mn2+ dependent, 1F	ZDB-GENE-051128-2	DKEY-72G15.2	ppm1f;ZDB-GENE-051128-2	protein_coding	ensembl_havana_gene	ENSDART00000051666.5	ENSDART00000051666
ENSDARG00000005789		NNN	0.406019	0.892619	0.406019	0.55676		ENSDARG00000005789.11	ectonucleotide pyrophosphatase/phosphodiesterase 1	ZDB-GENE-040724-172	enpp1	ZDB-GENE-040724-172	protein_coding	ensembl_havana_gene	ENSDART00000127350.4	ENSDART00000045183^ENSDART00000127350^ENSDART00000131311^ENSDART00000137431^ENSDART00000152331^ENSDART00000152395
ENSDARG00000005791		NNG	0.0394444	0.960508	0.0394444	0.825549		ENSDARG00000005791.8	ribosomal protein L28	ZDB-GENE-040930-10	—	—	protein_coding	ensembl	ENSDART00000175435.2	ENSDART00000012055^ENSDART00000175435^ENSDART00000186407
ENSDARG00000005799		SPG	0.0860769	0.995087	0.999998	0.0860769		ENSDARG00000005799.9	small integral membrane protein 14	ZDB-GENE-040426-22	DKEY-274K22.7	ZDB-GENE-040426-22	protein_coding	ensembl_havana_gene	ENSDART00000008201.9	ENSDART00000008201^ENSDART00000131979^ENSDART00000137567
ENSDARG00000005800		NNN	0.050339	0.050339	0.785885	0.999637		ENSDARG00000005800.10	adenosine monophosphate deaminase 3a	ZDB-GENE-110407-2	DKEYP-104H2.1	—	protein_coding	ensembl_havana_gene	ENSDART00000184462.1	ENSDART00000149680^ENSDART00000184462^ENSDART00000189424
ENSDARG00000005814		SNN	0.047397	0.997499	0.0753504	0.047397		ENSDARG00000005814.7	kelch-like family member 10a	ZDB-GENE-131015-1	ZFOS-538F9.2	—	protein_coding	ensembl_havana_gene	ENSDART00000191153.1	ENSDART00000015923^ENSDART00000181110^ENSDART00000191153
ENSDARG00000005821		NNN	0.981181	0.999961	0.98436	0.981181		ENSDARG00000005821.11	neutrophil cytosolic factor 2	ZDB-GENE-070209-29	ncf2	ZDB-GENE-070209-29	protein_coding	ensembl_havana_gene	ENSDART00000099138.7	ENSDART00000099138
ENSDARG00000005823		NNN	0.997912	0.997912	0.99977	0.999914		ENSDARG00000005823.9	solute carrier family 39 (zinc transporter), member 10	ZDB-GENE-040426-1157	slc39a10	ZDB-GENE-040426-1157	protein_coding	ensembl_havana_gene	ENSDART00000037025.7	ENSDART00000037025^ENSDART00000157474
ENSDARG00000005827		NNN	0.467627	0.99718	0.54943	0.467627		ENSDARG00000005827.9	eukaryotic translation initiation factor 2, subunit 1 alpha a	ZDB-GENE-030131-526	eif2s1l	ZDB-GENE-030131-526	protein_coding	ensembl_havana_gene	ENSDART00000006058.9	ENSDART00000006058
ENSDARG00000005828		NNN	0.870894	0.870894	0.989356	0.972804		ENSDARG00000005828.7	Fas apoptotic inhibitory molecule a	ZDB-GENE-040718-323	CH211-219A4.4	ZDB-GENE-040718-323	protein_coding	ensembl_havana_gene	ENSDART00000019053.7	ENSDART00000019053^ENSDART00000180758
ENSDARG00000005834		NNN	0.965593	0.965593	1	1		ENSDARG00000005834.12	GATA zinc finger domain containing 2B	ZDB-GENE-060503-655	DKEYP-66G8.1	ZDB-GENE-060503-655	protein_coding	ensembl_havana_gene	ENSDART00000033362.9	ENSDART00000033362
ENSDARG00000005840		NNN	0.993737	0.993737	0.999965	0.999936		ENSDARG00000005840.7	glutamic-oxaloacetic transaminase 2b, mitochondrial	ZDB-GENE-030131-7917	got2b	ZDB-GENE-030131-7917	protein_coding	ensembl_havana_gene	ENSDART00000007767.6	ENSDART00000007767^ENSDART00000174176
ENSDARG00000005841		NPN	0.0991114	0.0991114	0.977634	0.480628		ENSDARG00000005841.10	troponin I type 2a (skeletal, fast), tandem duplicate 2	ZDB-GENE-040426-970	tnni2a.2	ZDB-GENE-040426-970	protein_coding	ensembl_havana_gene	ENSDART00000149439.2	ENSDART00000149439
ENSDARG00000005842		NNN	0.965995	0.965995	1	1		ENSDARG00000005842.8	CD9 molecule a	ZDB-GENE-030131-1175	cd9	ZDB-GENE-030131-1175	protein_coding	ensembl_havana_gene	ENSDART00000135587.2	ENSDART00000019571^ENSDART00000135587^ENSDART00000143548
ENSDARG00000005846		NNN	0.989253	0.992622	0.989253	0.999852		ENSDARG00000005846.6	—	—	—	—	protein_coding	ensembl	ENSDART00000185105.1	ENSDART00000019630^ENSDART00000185105
ENSDARG00000005853		NNN	0.979753	0.979753	0.99958	0.999935		ENSDARG00000005853.8	solute carrier family 25 (mitochondrial carrier; adenine nucleotide translocator), member 6	ZDB-GENE-070912-446	DKEY-21O13.4	—	protein_coding	ensembl_havana_gene	ENSDART00000026378.8	ENSDART00000026378
ENSDARG00000005861		NNN	0.802633	0.802633	0.999969	0.999999		ENSDARG00000005861.12	Ral GTPase activating protein, alpha subunit 2 (catalytic)	ZDB-GENE-131122-56	rapgapa2	—	protein_coding	ensembl_havana_gene	ENSDART00000156031.2	ENSDART00000084745^ENSDART00000156031^ENSDART00000175577^ENSDART00000180172^ENSDART00000192801
ENSDARG00000005865		NNP	0.160224	0.342149	0.160224	0.986042		ENSDARG00000005865.8	odorant receptor, family H, subfamily 131, member 1	ZDB-GENE-070806-45	or131-1	ZDB-GENE-070806-45	protein_coding	havana	ENSDART00000139966.3	ENSDART00000139966
ENSDARG00000005867		NNN	0.999792	0.999792	0.999992	0.999987		ENSDARG00000005867.13	gon-4-like (C. elegans)	ZDB-GENE-070117-2447	DKEY-202I12.3	—	protein_coding	ensembl_havana_gene	ENSDART00000088023.4	ENSDART00000088023^ENSDART00000149315
ENSDARG00000005870		NNN	0.497071	0.993097	0.497071	0.573785		ENSDARG00000005870.11	methylmalonic aciduria (cobalamin deficiency) cblD type, with homocystinuria	ZDB-GENE-040704-50	DKEY-91I10.5	ZDB-GENE-040704-50	protein_coding	ensembl_havana_gene	ENSDART00000012478.9	ENSDART00000012478
ENSDARG00000005883		NNN	0.980059	0.980059	1	1		ENSDARG00000005883.11	regulatory factor X, 1a (influences HLA class II expression)	ZDB-GENE-070424-94	DKEYP-51F2.2	ZDB-GENE-070424-94	protein_coding	ensembl_havana_gene	ENSDART00000012335.9	ENSDART00000012335^ENSDART00000131503^ENSDART00000131759
ENSDARG00000005891		SGG	0.52695	1	0.52695	0.922284		ENSDARG00000005891.8	cytochrome b5 reductase 3	ZDB-GENE-030131-3281	cyb5r3	ZDB-GENE-030131-3281	protein_coding	ensembl_havana_gene	ENSDART00000014153.6	ENSDART00000014153^ENSDART00000150529
ENSDARG00000005894		NNN	0.501125	0.997435	0.501125	0.551903		ENSDARG00000005894.13	solute carrier family 7 (amino acid transporter light chain, bo,+ system), member 9	ZDB-GENE-080116-2	slc7a9	ZDB-GENE-080116-2	protein_coding	ensembl_havana_gene	ENSDART00000173830.2	ENSDART00000100479^ENSDART00000153482^ENSDART00000173468^ENSDART00000173635^ENSDART00000173830
ENSDARG00000005897		NNN	0.0492572	0.998946	0.0492572	0.250215		ENSDARG00000005897.10	deoxyribose-phosphate aldolase (putative)	ZDB-GENE-041010-200	dera	ZDB-GENE-041010-200	protein_coding	ensembl_havana_gene	ENSDART00000024312.10	ENSDART00000024312
ENSDARG00000005908		NNN	0.784281	0.784281	0.796028	0.99001		ENSDARG00000005908.11	CDC-like kinase 4b	ZDB-GENE-050227-19	CH211-253D5.1	ZDB-GENE-050227-19	protein_coding	ensembl_havana_gene	ENSDART00000139890.3	ENSDART00000091959^ENSDART00000134414^ENSDART00000135736^ENSDART00000139890^ENSDART00000183050^ENSDART00000190676
ENSDARG00000005913		NNG	0.0378623	0.45643	0.0378623	0.24345		ENSDARG00000005913.9	transglutaminase 1 like 3	ZDB-GENE-120718-1	—	—	protein_coding	ensembl	ENSDART00000041912.7	ENSDART00000041912
ENSDARG00000005915		NNN	0.384134	0.969224	0.650088	0.384134		ENSDARG00000005915.12	transcription factor 3a	ZDB-GENE-990415-51	tcf3	ZDB-GENE-990415-51	protein_coding	ensembl_havana_gene	ENSDART00000020529.9	ENSDART00000020529^ENSDART00000148873^ENSDART00000149235^ENSDART00000149884^ENSDART00000150122
ENSDARG00000005916		NNN	0.999992	0.999992	1	1		ENSDARG00000005916.11	SRSF protein kinase 3	ZDB-GENE-101025-2	CH211-109O5.1	—	protein_coding	ensembl_havana_gene	ENSDART00000151314.3	ENSDART00000151314^ENSDART00000170566
ENSDARG00000005924		NNN	0.999994	0.999994	1	1		ENSDARG00000005924.11	serpin peptidase inhibitor, clade A (alpha-1 antiproteinase, antitrypsin), member 10a	ZDB-GENE-041014-246	serpina10a	ZDB-GENE-041014-246	protein_coding	ensembl_havana_gene	ENSDART00000010293.11	ENSDART00000010293
ENSDARG00000005926		NGG	0.320187	0.859368	0.320187	0.843971		ENSDARG00000005926.6	adenylate kinase 2	ZDB-GENE-030131-512	ak2	ZDB-GENE-030131-512	protein_coding	ensembl_havana_gene	ENSDART00000003167.5	ENSDART00000003167^ENSDART00000136737^ENSDART00000169006
ENSDARG00000005927		SGG	0.240749	0.991773	0.240749	0.854701		ENSDARG00000005927.11	TBC1 domain family, member 17	ZDB-GENE-050522-79	tbc1d17	ZDB-GENE-050522-79	protein_coding	ensembl_havana_gene	ENSDART00000017422.9	ENSDART00000017422^ENSDART00000077057^ENSDART00000134395
ENSDARG00000005941		NNN	0.120304	0.386864	0.120304	0.629375		ENSDARG00000005941.8	clusterin-like 1 (retinal)	ZDB-GENE-031118-57	yes1	ZDB-GENE-050126-1	protein_coding	ensembl_havana_gene	ENSDART00000027090.7	ENSDART00000027090^ENSDART00000129349^ENSDART00000143794^ENSDART00000178066
ENSDARG00000005942		NNN	0.130249	0.652468	0.400933	0.130249		ENSDARG00000005942.10	vomeronasal 2 receptor, l1	ZDB-GENE-050419-65	CH211-141O12.1	—	protein_coding	ensembl_havana_gene	ENSDART00000126115.3	ENSDART00000126115
ENSDARG00000005943		SBB	0.999973	0.999973	0.999996	0.999997		ENSDARG00000005943.10	HtrA serine peptidase 4	ZDB-GENE-131120-192	DKEY-49O11.4	—	protein_coding	ensembl_havana_gene	ENSDART00000050542.8	ENSDART00000050542^ENSDART00000191032
ENSDARG00000005945		NNN	0.991779	0.994581	0.991779	0.997118		ENSDARG00000005945.7	SART1, U4/U6.U5 tri-snRNP-associated protein 1	ZDB-GENE-040718-422	sart1	ZDB-GENE-040718-422	protein_coding	ensembl_havana_gene	ENSDART00000012855.7	ENSDART00000012855
ENSDARG00000005948		NNN	0.931566	0.931566	0.996684	0.999268		ENSDARG00000005948.8	ankyrin repeat and MYND domain containing 2a	ZDB-GENE-030131-6321	CH73-144M15.4	ZDB-GENE-030131-6321	protein_coding	ensembl_havana_gene	ENSDART00000003674.8	ENSDART00000003674
ENSDARG00000005972		NPP	0.763649	0.763649	0.989999	0.989044		ENSDARG00000005972.11	RIC8 guanine nucleotide exchange factor B	ZDB-GENE-030131-6435	ric8b	ZDB-GENE-030131-6435	protein_coding	ensembl_havana_gene	ENSDART00000019818.9	ENSDART00000019818^ENSDART00000149290^ENSDART00000150053^ENSDART00000191903
ENSDARG00000005980		NNN	0.69549	0.69549	0.855823	0.999781		ENSDARG00000005980.11	splicing factor SWAP	ZDB-GENE-040426-931	DKEY-11O15.1	ZDB-GENE-040426-931	protein_coding	ensembl_havana_gene	ENSDART00000143113.3	ENSDART00000141809^ENSDART00000143113
ENSDARG00000005989		NNN	0.888435	0.888435	0.959312	0.999989		ENSDARG00000005989.8	ral guanine nucleotide dissociation stimulator-like 1	ZDB-GENE-040426-1816	rgl1	ZDB-GENE-040426-1816	protein_coding	ensembl_havana_gene	ENSDART00000138881.3	ENSDART00000135039^ENSDART00000137133^ENSDART00000138881^ENSDART00000164780
ENSDARG00000005993		NNN	0.0405795	0.0889205	0.494243	0.0405795		ENSDARG00000005993.8	protein regulator of cytokinesis 1b	ZDB-GENE-040426-777	prc1b	ZDB-GENE-040426-777	protein_coding	ensembl_havana_gene	ENSDART00000134941.2	ENSDART00000134941^ENSDART00000141926
ENSDARG00000006003		NNN	0.957476	0.957476	0.991244	0.999047		ENSDARG00000006003.8	MYCL proto-oncogene, bHLH transcription factor a	ZDB-GENE-040426-2439	mycl1a	ZDB-GENE-040426-2439	protein_coding	ensembl_havana_gene	ENSDART00000013961.7	ENSDART00000013961^ENSDART00000147522
ENSDARG00000006008		NNN	0.929582	0.999689	0.929582	0.988658		ENSDARG00000006008.11	dopachrome tautomerase	ZDB-GENE-000508-1	dct	ZDB-GENE-000508-1	protein_coding	ensembl_havana_gene	ENSDART00000125715.3	ENSDART00000125715^ENSDART00000145138
ENSDARG00000006010		NNN	0.998949	0.998949	0.999998	1		ENSDARG00000006010.9	bmi1 polycomb ring finger oncogene 1a	ZDB-GENE-030131-224	bmi1	ZDB-GENE-030131-224	protein_coding	ensembl_havana_gene	ENSDART00000129554.4	ENSDART00000066765^ENSDART00000129554^ENSDART00000145949
ENSDARG00000006011		NNN	0.231506	0.606915	0.231506	0.455817		ENSDARG00000006011.7	kelch-like family, member 42	ZDB-GENE-041210-190	CH211-234F20.7	—	protein_coding	ensembl_havana_gene	ENSDART00000007030.7	ENSDART00000007030
ENSDARG00000006019		NGN	0.144525	0.999225	0.611025	0.144525		ENSDARG00000006019.8	transketolase b	ZDB-GENE-030909-13	tkt	ZDB-GENE-030909-13	protein_coding	ensembl_havana_gene	ENSDART00000005021.6	ENSDART00000005021^ENSDART00000134582^ENSDART00000144708^ENSDART00000146888^ENSDART00000147725
ENSDARG00000006025		NNN	0.289062	0.906376	0.393241	0.289062		ENSDARG00000006025.12	tumor protein p53 inducible protein 11b	ZDB-GENE-030131-6328	CH211-122K23.2	—	protein_coding	ensembl_havana_gene	ENSDART00000140781.3	ENSDART00000014726^ENSDART00000132017^ENSDART00000140781^ENSDART00000181593^ENSDART00000182018
ENSDARG00000006029		NNN	0.999462	0.999462	0.999855	0.999894		ENSDARG00000006029.7	leukotriene A4 hydrolase	ZDB-GENE-040426-2477	lta4h	ZDB-GENE-040426-2477	protein_coding	ensembl_havana_gene	ENSDART00000028171.7	ENSDART00000028171^ENSDART00000148973
ENSDARG00000006031		NNN	0.997476	0.99936	0.997476	0.998446		ENSDARG00000006031.10	4-aminobutyrate aminotransferase	ZDB-GENE-031006-4	abat	ZDB-GENE-031006-4	protein_coding	ensembl_havana_gene	ENSDART00000151404.2	ENSDART00000151385^ENSDART00000151404^ENSDART00000185812
ENSDARG00000006038		NNN	0.869059	0.99681	0.869059	0.880512		ENSDARG00000006038.10	AE binding protein 2	ZDB-GENE-040426-2885	aebp2	ZDB-GENE-040426-2885	protein_coding	ensembl_havana_gene	ENSDART00000019518.8	ENSDART00000019518^ENSDART00000128934
ENSDARG00000006040		NGN	0.363788	0.452083	0.671207	0.363788		ENSDARG00000006040.9	cytochrome P450, family 20, subfamily A, polypeptide 1	ZDB-GENE-040426-2646	cyp20a1	—	protein_coding	ensembl_havana_gene	ENSDART00000019325.9	ENSDART00000019325
ENSDARG00000006044		NNN	0.0411132	0.487948	0.0411132	0.0598945		ENSDARG00000006044.8	uronyl-2-sulfotransferase	ZDB-GENE-041001-163	ust	ZDB-GENE-041001-163	protein_coding	ensembl_havana_gene	ENSDART00000007735.7	ENSDART00000007735
ENSDARG00000006052		SGG	0.789615	1	0.842775	0.789615		ENSDARG00000006052.11	MALT paracaspase 2	ZDB-GENE-020801-2	malt1	ZDB-GENE-020801-2	protein_coding	ensembl_havana_gene	ENSDART00000008424.10	ENSDART00000008424^ENSDART00000147895
ENSDARG00000006060		SGG	0.417182	0.986635	0.417182	0.445729		ENSDARG00000006060.12	crystallin beta-gamma domain containing 1b	ZDB-GENE-030131-7179	CH211-152C2.2	—	protein_coding	ensembl_havana_gene	ENSDART00000022668.11	ENSDART00000022668^ENSDART00000149162
ENSDARG00000006062		NNN	0.999854	0.999854	0.999998	1		ENSDARG00000006062.8	A kinase (PRKA) anchor protein 1b	ZDB-GENE-030131-6844	akap1	ZDB-GENE-030131-6844	protein_coding	ensembl_havana_gene	ENSDART00000138988.3	ENSDART00000112511^ENSDART00000134878^ENSDART00000136673^ENSDART00000138988
ENSDARG00000006065		NNN	0.994546	0.994546	0.999722	1		ENSDARG00000006065.12	zinc finger protein 385B	ZDB-GENE-030616-154	znf385b	ZDB-GENE-030616-154;znf533	protein_coding	ensembl_havana_gene	ENSDART00000140526.4	ENSDART00000138436^ENSDART00000140526
ENSDARG00000006074		NNN	0.999993	0.999993	0.999995	1		ENSDARG00000006074.8	uridine-cytidine kinase 2a	ZDB-GENE-030131-7158	umpk	ZDB-GENE-030131-7158	protein_coding	ensembl_havana_gene	ENSDART00000002186.8	ENSDART00000002186^ENSDART00000138968
ENSDARG00000006079		NNN	0.989182	0.995685	0.989182	0.999998		ENSDARG00000006079.8	G protein-coupled receptor 37 like 1a	ZDB-GENE-110411-20	CH1073-204J4.1	—	protein_coding	ensembl_havana_gene	ENSDART00000149712.2	ENSDART00000009756^ENSDART00000149712
ENSDARG00000006092		NNN	0.979796	0.981734	0.991414	0.979796		ENSDARG00000006092.8	RAD21 cohesin complex component a	ZDB-GENE-030131-994	rad21	ZDB-GENE-030131-994	protein_coding	ensembl_havana_gene	ENSDART00000005927.8	ENSDART00000005927^ENSDART00000168069^ENSDART00000190554
ENSDARG00000006093		NNN	0.942874	0.999812	0.942874	0.997788		ENSDARG00000006093.9	cyclin-dependent kinase 15	ZDB-GENE-060421-7193	CH211-106F9.4	ZDB-GENE-060421-7193	protein_coding	ensembl_havana_gene	ENSDART00000081129.5	ENSDART00000081129
ENSDARG00000006094		NNN	0.329605	0.66054	0.380631	0.329605		ENSDARG00000006094.9	insulin-like growth factor 2 receptor	ZDB-GENE-041014-300	igf2r	ZDB-GENE-041014-300	protein_coding	ensembl_havana_gene	ENSDART00000061101.6	ENSDART00000061101^ENSDART00000153441
ENSDARG00000006109		NNN	0.529026	0.944817	0.529026	0.756163		ENSDARG00000006109.11	Pim proto-oncogene, serine/threonine kinase, related 185	ZDB-GENE-081104-450	DKEYP-104H9.7	—	protein_coding	havana	ENSDART00000144825.2	ENSDART00000144825
ENSDARG00000006110		NNN	0.998581	0.999999	0.999996	0.998581		ENSDARG00000006110.12	chordin	ZDB-GENE-990415-33	chd	ZDB-GENE-990415-33	protein_coding	ensembl_havana_gene	ENSDART00000045110.8	ENSDART00000045110^ENSDART00000148525
ENSDARG00000006112		SBB	0.994889	1	0.999403	0.994889		ENSDARG00000006112.11	myoferlin	ZDB-GENE-040426-1138	DKEY-102E1.1	ZDB-GENE-040426-1138	protein_coding	ensembl_havana_gene	ENSDART00000144283.3	ENSDART00000144283
ENSDARG00000006120		NNN	0.97268	0.97268	1	0.999998		ENSDARG00000006120.10	T-box 2b	ZDB-GENE-990726-27	tbx2b	ZDB-GENE-990726-27	protein_coding	ensembl_havana_gene	ENSDART00000122101.4	ENSDART00000122101
ENSDARG00000006124		NNN	0.766222	0.766222	0.95699	0.949143		ENSDARG00000006124.12	lysine (K)-specific demethylase 5C	ZDB-GENE-060810-94	CH211-218O21.2	—	protein_coding	ensembl_havana_gene	ENSDART00000127053.3	ENSDART00000127053^ENSDART00000137864
ENSDARG00000006125		NGG	0.103187	0.200037	0.149202	0.103187		ENSDARG00000006125.10	casein kinase 1, delta b	ZDB-GENE-040426-2385	csnk1d	—	protein_coding	ensembl_havana_gene	ENSDART00000021491.9	ENSDART00000021491^ENSDART00000188988
ENSDARG00000006128		NNN	0.999874	0.999874	1	1		ENSDARG00000006128.13	centrosomal protein 170Aa	ZDB-GENE-090312-109	cep170a	—	protein_coding	ensembl_havana_gene	ENSDART00000135989.4	ENSDART00000108709^ENSDART00000135989^ENSDART00000170943^ENSDART00000185831
ENSDARG00000006137		NNN	0.961641	0.961641	0.984714	0.995191		ENSDARG00000006137.7	steroidogenic acute regulatory protein	ZDB-GENE-001120-3	star	ZDB-GENE-001120-3	protein_coding	ensembl_havana_gene	ENSDART00000016225.7	ENSDART00000016225^ENSDART00000135630
ENSDARG00000006151		NNN	0.999095	0.999095	0.99988	0.999709		ENSDARG00000006151.12	phosphodiesterase 11a, like	ZDB-GENE-031118-106	pde11al	ZDB-GENE-031118-106	protein_coding	ensembl_havana_gene	ENSDART00000006412.11	ENSDART00000006412^ENSDART00000133403^ENSDART00000143567
ENSDARG00000006169		NNN	0.20459	0.278337	0.449193	0.20459		ENSDARG00000006169.11	leucine-rich repeat kinase 2	ZDB-GENE-071218-6	lrrk2	ZDB-GENE-071218-6	protein_coding	ensembl_havana_gene	ENSDART00000148718.3	ENSDART00000148718
ENSDARG00000006174		NNN	0.113841	0.912296	0.561804	0.113841		ENSDARG00000006174.7	leucine rich repeat containing 23	ZDB-GENE-041010-153	DKEY-32E6.8	ZDB-GENE-041010-153	protein_coding	ensembl_havana_gene	ENSDART00000004871.7	ENSDART00000004871^ENSDART00000146179
ENSDARG00000006181		NNN	0.99869	0.999662	0.99869	0.999975		ENSDARG00000006181.10	hypoxia inducible factor 1, alpha subunit (basic helix-loop-helix transcription factor) a	ZDB-GENE-080917-55	DKEY-174E3.2	—	protein_coding	ensembl_havana_gene	ENSDART00000044282.7	ENSDART00000044282^ENSDART00000144328^ENSDART00000147222
ENSDARG00000006192		NNN	0.0486373	0.9516	0.155764	0.0486373		ENSDARG00000006192.10	GATA zinc finger domain containing 2Ab	ZDB-GENE-040426-2372	DKEY-11N6.1	—	protein_coding	ensembl_havana_gene	ENSDART00000033103.7	ENSDART00000033103^ENSDART00000137985^ENSDART00000160413^ENSDART00000184649^ENSDART00000184747^ENSDART00000186580
ENSDARG00000006196		NGG	0.454626	0.454626	0.671481	0.616683		ENSDARG00000006196.8	salvador family WW domain containing protein 1	ZDB-GENE-040912-28	CH211-282C13.3	ZDB-GENE-040912-28	protein_coding	ensembl_havana_gene	ENSDART00000012357.5	ENSDART00000012357
ENSDARG00000006200		NNN	0.118299	0.985028	0.118299	0.266699		ENSDARG00000006200.11	eukaryotic translation initiation factor 4 gamma, 1a	ZDB-GENE-070112-702	CH73-211A15.2	ZDB-GENE-070112-702	protein_coding	ensembl_havana_gene	ENSDART00000087120.8	ENSDART00000087107^ENSDART00000087120^ENSDART00000145778^ENSDART00000179816^ENSDART00000181603^ENSDART00000187009
ENSDARG00000006202		SPP	0.999997	0.999997	1	1		ENSDARG00000006202.10	erb-b2 receptor tyrosine kinase 3a	ZDB-GENE-030916-3	erbb3a	ZDB-GENE-030916-3	protein_coding	ensembl_havana_gene	ENSDART00000148908.3	ENSDART00000014892^ENSDART00000148559^ENSDART00000148908^ENSDART00000149285^ENSDART00000150046
ENSDARG00000006206		NNN	0.992316	0.999932	0.992316	0.999992		ENSDARG00000006206.11	POU class 4 homeobox 3	ZDB-GENE-990415-24	—	—	protein_coding	ensembl	ENSDART00000149175.2	ENSDART00000149175
ENSDARG00000006207		NNN	0.0969614	0.376776	0.182039	0.0969614		ENSDARG00000006207.8	glutathione peroxidase 1b	ZDB-GENE-040912-60	DKEY-178O3.5	ZDB-GENE-040912-60	protein_coding	ensembl_havana_gene	ENSDART00000015277.7	ENSDART00000015277
ENSDARG00000006215		NNN	0.868516	0.999997	0.868516	0.999559		ENSDARG00000006215.10	aldo-keto reductase family 1, member B1 (aldose reductase)	ZDB-GENE-040625-7	DKEY-14K9.1	—	protein_coding	ensembl_havana_gene	ENSDART00000018261.8	ENSDART00000018261^ENSDART00000187456
ENSDARG00000006219		NNN	0.0567409	0.999997	0.0567409	0.414462		ENSDARG00000006219.8	guanine nucleotide binding protein-like 3 (nucleolar)	ZDB-GENE-030131-616	gnl3	ZDB-GENE-030131-616	protein_coding	ensembl_havana_gene	ENSDART00000122953.3	ENSDART00000122833^ENSDART00000122953
ENSDARG00000006220		SPN	0.0225631	0.999321	0.999423	0.0225631		ENSDARG00000006220.12	UDP glucuronosyltransferase 1 family a, b	ZDB-GENE-040426-2762	CH211-226C11.2	ZDB-GENE-040426-2762	protein_coding	ensembl_havana_gene	ENSDART00000010246.9	ENSDART00000010246^ENSDART00000081463^ENSDART00000102448^ENSDART00000123415^ENSDART00000124423^ENSDART00000124516^ENSDART00000125852^ENSDART00000130243^ENSDART00000187315^ENSDART00000192548^ENSDART00000193475
ENSDARG00000006225		NNN	0.704934	0.930467	0.778831	0.704934		ENSDARG00000006225.8	DEAD (Asp-Glu-Ala-Asp) box polypeptide 39Aa	ZDB-GENE-030131-4275	ddx39a	—	protein_coding	ensembl_havana_gene	ENSDART00000014727.8	ENSDART00000014727^ENSDART00000145757
ENSDARG00000006235		NNN	0.982058	0.982058	0.995155	0.995232		ENSDARG00000006235.11	breast cancer metastasis-suppressor 1-like a	ZDB-GENE-050913-49	brms1la	ZDB-GENE-050913-49	protein_coding	ensembl_havana_gene	ENSDART00000003418.10	ENSDART00000003418^ENSDART00000131564^ENSDART00000134437
ENSDARG00000006240		NNG	0.111071	0.957414	0.111071	0.394592		ENSDARG00000006240.7	solute carrier family 27 (fatty acid transporter), member 1a	ZDB-GENE-050320-112	slc27a1a	ZDB-GENE-050320-112	protein_coding	ensembl_havana_gene	ENSDART00000018908.7	ENSDART00000018908^ENSDART00000184183
ENSDARG00000006242		NNN	0.856188	0.898815	0.856188	0.997007		ENSDARG00000006242.12	protein tyrosine phosphatase type IVA, member 1	ZDB-GENE-041121-11	ptp4a1	ZDB-GENE-041121-11	protein_coding	ensembl_havana_gene	ENSDART00000026814.10	ENSDART00000026814^ENSDART00000129843^ENSDART00000148425^ENSDART00000151926^ENSDART00000166489^ENSDART00000169001^ENSDART00000172939^ENSDART00000173346^ENSDART00000190678
ENSDARG00000006251		NNN	0.0257726	0.822097	0.457462	0.0257726		ENSDARG00000006251.12	elongation factor, RNA polymerase II, 2	ZDB-GENE-030131-1717	ell2	ZDB-GENE-030131-1717	protein_coding	ensembl_havana_gene	ENSDART00000102408.5	ENSDART00000102404^ENSDART00000102408^ENSDART00000128817
ENSDARG00000006253		NNN	0.622981	0.622981	0.651223	0.92336		ENSDARG00000006253.9	mesoderm induction early response 1, family member 3 a	ZDB-GENE-050913-97	—	—	protein_coding	ensembl	ENSDART00000123754.3	ENSDART00000123754^ENSDART00000126236
ENSDARG00000006257		NNN	0.996964	0.996964	1	1		ENSDARG00000006257.10	very low density lipoprotein receptor	ZDB-GENE-040426-803	vldlr	—	protein_coding	ensembl_havana_gene	ENSDART00000023766.9	ENSDART00000023766^ENSDART00000138761^ENSDART00000139047^ENSDART00000147877^ENSDART00000172107^ENSDART00000183413^ENSDART00000185314
ENSDARG00000006260		NGG	0.229125	0.983489	0.378049	0.229125		ENSDARG00000006260.13	tubulin, alpha 8 like 4	ZDB-GENE-040426-860	tuba8l4	ZDB-GENE-040426-860	protein_coding	ensembl_havana_gene	ENSDART00000039443.9	ENSDART00000039443^ENSDART00000151271^ENSDART00000151822^ENSDART00000177960
ENSDARG00000006266		NNG	0.0282359	0.244472	0.0282359	0.080176		ENSDARG00000006266.9	signal transducer and activator of transcription 1a	ZDB-GENE-980526-499	stat1	ZDB-GENE-980526-499	protein_coding	ensembl_havana_gene	ENSDART00000005720.6	ENSDART00000005720
ENSDARG00000006272		NNN	0.0507108	0.71649	0.282162	0.0507108		ENSDARG00000006272.9	membrane protein, palmitoylated 5a (MAGUK p55 subfamily member 5)	ZDB-GENE-020712-1	mpp5	ZDB-GENE-020712-1	protein_coding	ensembl_havana_gene	ENSDART00000136167.2	ENSDART00000014306^ENSDART00000136167^ENSDART00000186775
ENSDARG00000006279		NGG	0.56602	0.929846	0.56602	0.588764		ENSDARG00000006279.9	ras-related GTP binding D	ZDB-GENE-070620-6	CH73-315M17.1	ZDB-GENE-070620-6	protein_coding	ensembl_havana_gene	ENSDART00000027667.9	ENSDART00000027667
ENSDARG00000006283		SPG	0.147055	1	0.985093	0.147055		ENSDARG00000006283.8	Wiskott-Aldrich syndrome-like b	ZDB-GENE-040426-718	waslb	ZDB-GENE-040426-718	protein_coding	ensembl_havana_gene	ENSDART00000028016.8	ENSDART00000028016
ENSDARG00000006288		SBB	0.998249	0.998928	0.998271	0.998249		ENSDARG00000006288.10	PR domain containing 5	ZDB-GENE-040708-1	—	—	protein_coding	ensembl	ENSDART00000127443.4	ENSDART00000127443^ENSDART00000191312
ENSDARG00000006290		NNN	0.705239	0.998728	0.705239	0.78473		ENSDARG00000006290.9	NADH dehydrogenase (ubiquinone) Fe-S protein 5	ZDB-GENE-050522-437	ndufs5	ZDB-GENE-050522-437	protein_coding	ensembl_havana_gene	ENSDART00000012167.8	ENSDART00000012167
ENSDARG00000006292		NNP	0.0323162	0.886287	0.0323162	0.999221		ENSDARG00000006292.12	MYCBP-associated, testis expressed 1	ZDB-GENE-070912-489	DKEY-265I7.2	—	protein_coding	ensembl_havana_gene	ENSDART00000081859.7	ENSDART00000081859^ENSDART00000143101^ENSDART00000188567
ENSDARG00000006299		NNN	0.943276	0.943276	1	1		ENSDARG00000006299.11	Rho guanine nucleotide exchange factor (GEF) 7a	ZDB-GENE-060322-11	DKEY-19J7.3	—	protein_coding	ensembl_havana_gene	ENSDART00000182266.1	ENSDART00000132211^ENSDART00000141408^ENSDART00000144872^ENSDART00000182266
ENSDARG00000006300		NGN	0.0227866	0.995849	0.43198	0.0227866		ENSDARG00000006300.9	proteasome 26S subunit, non-ATPase 9	ZDB-GENE-030131-431	—	—	protein_coding	ensembl	ENSDART00000012918.7	ENSDART00000012918^ENSDART00000182268^ENSDART00000185750
ENSDARG00000006301		NNN	0.365195	0.365195	0.514012	0.847567		ENSDARG00000006301.10	Ras association (RalGDS/AF-6) and pleckstrin homology domains 1a	ZDB-GENE-070912-156	CH211-176F1.1	—	protein_coding	ensembl_havana_gene	ENSDART00000061156.7	ENSDART00000061156^ENSDART00000132960^ENSDART00000146597^ENSDART00000193398
ENSDARG00000006307		NNN	0.998424	0.998424	1	1		ENSDARG00000006307.7	shisa family member 4	ZDB-GENE-050417-419	shisa4	ZDB-GENE-050417-419	protein_coding	ensembl_havana_gene	ENSDART00000006038.7	ENSDART00000006038^ENSDART00000167678
ENSDARG00000006308		NNN	0.0670065	0.991023	0.840465	0.0670065		ENSDARG00000006308.9	protein tyrosine phosphatase, non-receptor type 18	ZDB-GENE-050320-12	DKEY-161M5.1	ZDB-GENE-050320-12	protein_coding	ensembl_havana_gene	ENSDART00000132158.2	ENSDART00000132158^ENSDART00000134952
ENSDARG00000006314		SBB	0.999899	0.999966	0.999899	0.999974		ENSDARG00000006314.12	integrin, alpha V	ZDB-GENE-060616-382	itgav	ZDB-GENE-060616-382	protein_coding	ensembl_havana_gene	ENSDART00000044314.8	ENSDART00000044314^ENSDART00000124129
ENSDARG00000006316		NNG	0.0568594	0.907792	0.0568594	0.744807		ENSDARG00000006316.8	ribosomal protein L23a	ZDB-GENE-030131-7479	rpl23a	ZDB-GENE-030131-7479	protein_coding	ensembl_havana_gene	ENSDART00000003001.8	ENSDART00000003001^ENSDART00000134939^ENSDART00000141001^ENSDART00000146573^ENSDART00000193273
ENSDARG00000006332		NNN	0.104695	0.338047	0.104695	0.330841		ENSDARG00000006332.11	sorting nexin 14	ZDB-GENE-040724-144	snx14	ZDB-GENE-040724-144	protein_coding	ensembl_havana_gene	ENSDART00000142361.4	ENSDART00000020506^ENSDART00000104725^ENSDART00000141333^ENSDART00000142361
ENSDARG00000006341		NNG	0.0239857	0.315561	0.0239857	0.197955		ENSDARG00000006341.9	taste receptor, type 1, member 3	ZDB-GENE-070917-3	tas1r3	ZDB-GENE-070917-3	protein_coding	ensembl_havana_gene	ENSDART00000021369.8	ENSDART00000021369^ENSDART00000173399
ENSDARG00000006345		NNN	0.984875	0.9991	0.999221	0.984875		ENSDARG00000006345.8	mediator complex subunit 17	ZDB-GENE-040302-1	—	—	protein_coding	ensembl	ENSDART00000008504.8	ENSDART00000008504
ENSDARG00000006350		NNN	0.624987	0.624987	0.992631	0.996074		ENSDARG00000006350.10	NK1 transcription factor related 2-like,a	ZDB-GENE-040615-1	nkx1.2la	ZDB-GENE-040615-1	protein_coding	ensembl_havana_gene	ENSDART00000085846.6	ENSDART00000085846
ENSDARG00000006353		NNN	0.61598	0.61598	0.933709	0.926092		ENSDARG00000006353.12	integrin, alpha 5 (fibronectin receptor, alpha polypeptide)	ZDB-GENE-031116-52	itga5	ZDB-GENE-031116-52	protein_coding	ensembl_havana_gene	ENSDART00000018301.11	ENSDART00000018301^ENSDART00000147392
ENSDARG00000006356		NNN	0.999974	0.999974	1	1		ENSDARG00000006356.6	solute carrier family 18 (vesicular acetylcholine transporter), member 3a	ZDB-GENE-060929-990	CH211-232K3.4	ZDB-GENE-060929-990	protein_coding	ensembl_havana_gene	ENSDART00000026765.6	ENSDART00000026765
ENSDARG00000006368		NNN	0.173281	0.965561	0.90511	0.173281		ENSDARG00000006368.12	cytokine receptor-like factor 1b	ZDB-GENE-080108-1	crlf1b	ZDB-GENE-080108-1	protein_coding	ensembl_havana_gene	ENSDART00000007321.10	ENSDART00000007321^ENSDART00000166342
ENSDARG00000006370		NNN	0.324169	0.324169	0.757924	0.964545		ENSDARG00000006370.9	ATPase H+ transporting V1 subunit H	ZDB-GENE-021219-2	atp6v1h	ZDB-GENE-021219-2	protein_coding	ensembl_havana_gene	ENSDART00000145681.2	ENSDART00000019029^ENSDART00000138122^ENSDART00000139697^ENSDART00000145681^ENSDART00000189233
ENSDARG00000006372		NNN	0.491396	0.491396	0.919332	0.550522		ENSDARG00000006372.9	UDP glucuronosyltransferase 5 family, polypeptide C2	ZDB-GENE-060825-206	CH211-278N20.5	—	protein_coding	ensembl_havana_gene	ENSDART00000087647.5	ENSDART00000087645^ENSDART00000087647
ENSDARG00000006383		NNN	0.999928	0.999928	1	1		ENSDARG00000006383.12	syntaxin binding protein 5-like	ZDB-GENE-041210-220	DKEY-193N17.3	—	protein_coding	ensembl_havana_gene	ENSDART00000017292.10	ENSDART00000017292^ENSDART00000138602^ENSDART00000181270^ENSDART00000187112
ENSDARG00000006385		SGG	0.781249	0.999808	0.895418	0.781249		ENSDARG00000006385.13	TRIO and F-actin binding protein b	ZDB-GENE-061215-80	CH73-211L13.4	ZDB-GENE-061215-80	protein_coding	ensembl_havana_gene	ENSDART00000155340.3	ENSDART00000031823^ENSDART00000155340^ENSDART00000173378
ENSDARG00000006389		NNN	0.943558	0.943558	0.99776	0.998773		ENSDARG00000006389.8	SMAD family member 2	ZDB-GENE-990603-7	smad2	ZDB-GENE-990603-7	protein_coding	ensembl_havana_gene	ENSDART00000121892.4	ENSDART00000044756^ENSDART00000121892^ENSDART00000128579^ENSDART00000137430^ENSDART00000143608^ENSDART00000147653^ENSDART00000184617
ENSDARG00000006392		NNN	0.613648	0.999092	0.613648	0.874267		ENSDARG00000006392.9	exosome component 9	ZDB-GENE-041010-180	exosc9	ZDB-GENE-041010-180	protein_coding	ensembl_havana_gene	ENSDART00000002886.8	ENSDART00000002886^ENSDART00000131948
ENSDARG00000006395		NNN	0.886916	0.991722	0.886916	0.996708		ENSDARG00000006395.9	RNA binding motif protein 25b	ZDB-GENE-030131-5547	rbm25	ZDB-GENE-030131-5547	protein_coding	ensembl_havana_gene	ENSDART00000027836.7	ENSDART00000027836^ENSDART00000114407^ENSDART00000147413
ENSDARG00000006396		NNN	0.173095	0.173095	0.99992	0.99986		ENSDARG00000006396.10	neuronal cell adhesion molecule a	ZDB-GENE-041210-235	nrcam	ZDB-GENE-041210-235	protein_coding	ensembl_havana_gene	ENSDART00000122041.3	ENSDART00000109195^ENSDART00000122041^ENSDART00000192554
ENSDARG00000006397		NNN	0.209201	0.645364	0.209201	0.505921		ENSDARG00000006397.12	lysosomal protein transmembrane 4 alpha	ZDB-GENE-030131-1024	laptm4a	ZDB-GENE-030131-1024	protein_coding	ensembl_havana_gene	ENSDART00000004601.10	ENSDART00000004601^ENSDART00000150093
ENSDARG00000006399		NNN	0.486906	0.923983	0.486906	0.797157		ENSDARG00000006399.8	tyrosine 3-monooxygenase/tryptophan 5-monooxygenase activation protein, epsilon polypeptide 1	ZDB-GENE-030131-779	ywhae	ZDB-GENE-030131-779	protein_coding	ensembl_havana_gene	ENSDART00000032306.7	ENSDART00000032306^ENSDART00000146107
ENSDARG00000006408		NNN	0.115016	0.928892	0.16236	0.115016		ENSDARG00000006408.9	high mobility group box 3b	ZDB-GENE-050417-290	DKEYP-81E1.1	ZDB-GENE-050417-290	protein_coding	ensembl_havana_gene	ENSDART00000024750.8	ENSDART00000024750^ENSDART00000128242^ENSDART00000182627
ENSDARG00000006409		NNN	0.999561	0.999961	0.999561	0.999999		ENSDARG00000006409.9	mitogen-activated protein kinase 12b	ZDB-GENE-041210-123	mapk12b	ZDB-GENE-041210-123	protein_coding	ensembl_havana_gene	ENSDART00000027304.8	ENSDART00000027304^ENSDART00000150379
ENSDARG00000006413		NNN	0.103551	0.715821	0.222283	0.103551		ENSDARG00000006413.8	ribosomal protein L38	ZDB-GENE-030131-8752	rpl38	ZDB-GENE-030131-8752	protein_coding	ensembl_havana_gene	ENSDART00000021069.8	ENSDART00000021069^ENSDART00000145377
ENSDARG00000006420		NNN	0.476623	0.476623	1	1		ENSDARG00000006420.12	attractin-like 1b	ZDB-GENE-030131-8092	atrnl1	ZDB-GENE-030131-8092	protein_coding	ensembl_havana_gene	ENSDART00000042514.10	ENSDART00000042514
ENSDARG00000006422		SGG	0.129064	1	0.129064	0.282396		ENSDARG00000006422.8	extended synaptotagmin-like protein 3	ZDB-GENE-050809-35	CH211-219A4.7	ZDB-GENE-050809-35	protein_coding	ensembl_havana_gene	ENSDART00000027443.8	ENSDART00000027443^ENSDART00000129737
ENSDARG00000006427		NNN	0.473568	0.80383	0.473568	0.591227		ENSDARG00000006427.6	fatty acid binding protein 2, intestinal	ZDB-GENE-991019-5	fabp2	ZDB-GENE-991019-5	protein_coding	ensembl_havana_gene	ENSDART00000027973.6	ENSDART00000027973^ENSDART00000136984
ENSDARG00000006434		NNN	0.787564	0.999949	0.787564	0.937216		ENSDARG00000006434.10	polymerase (RNA) I polypeptide E	ZDB-GENE-050522-251	polr1e	ZDB-GENE-050522-251	protein_coding	ensembl_havana_gene	ENSDART00000054574.6	ENSDART00000054574^ENSDART00000141660^ENSDART00000146688^ENSDART00000147274
ENSDARG00000006447		NNN	0.280703	0.901614	0.628412	0.280703		ENSDARG00000006447.11	solute carrier family 19 (thiamine transporter), member 3a	ZDB-GENE-110411-41	CH211-158N6.4	—	protein_coding	ensembl_havana_gene	ENSDART00000059204.8	ENSDART00000059204
ENSDARG00000006456		NNN	0.877768	0.877768	0.939475	0.996486		ENSDARG00000006456.9	platelet-derived growth factor receptor-like	ZDB-GENE-040426-901	pdgfrl	ZDB-GENE-040426-901	protein_coding	ensembl_havana_gene	ENSDART00000007022.9	ENSDART00000007022
ENSDARG00000006467		NNN	0.999314	0.999314	1	1		ENSDARG00000006467.12	protocadherin 8	ZDB-GENE-980526-242	—	—	protein_coding	ensembl	ENSDART00000126314.4	ENSDART00000126314
ENSDARG00000006468		NNN	0.988418	0.988418	0.996744	0.998833		ENSDARG00000006468.9	GRB2-related adaptor protein 2a	ZDB-GENE-050417-275	grap2	ZDB-GENE-050417-275	protein_coding	ensembl_havana_gene	ENSDART00000020381.7	ENSDART00000020381^ENSDART00000134258
ENSDARG00000006474		NNN	0.178117	0.999895	0.666464	0.178117		ENSDARG00000006474.11	stabilizer of axonemal microtubules 2	ZDB-GENE-051127-27	saxo2	ZDB-GENE-051127-27	protein_coding	ensembl_havana_gene	ENSDART00000053860.7	ENSDART00000053860
ENSDARG00000006477		NGN	0.111646	0.111646	0.894683	0.308814		ENSDARG00000006477.9	DNA-damage inducible protein 2	ZDB-GENE-031030-15	ddi2	ZDB-GENE-031030-15	protein_coding	ensembl_havana_gene	ENSDART00000155928.2	ENSDART00000017859^ENSDART00000155928
ENSDARG00000006487		NNN	0.762371	0.968598	0.762371	0.952056		ENSDARG00000006487.9	acidic (leucine-rich) nuclear phosphoprotein 32 family, member A	ZDB-GENE-030131-7850	anp32a	ZDB-GENE-030131-7850	protein_coding	ensembl_havana_gene	ENSDART00000008785.9	ENSDART00000008785^ENSDART00000143514^ENSDART00000146420^ENSDART00000147999
ENSDARG00000006491		SGG	0.363667	0.99922	0.559748	0.363667		ENSDARG00000006491.9	1-acylglycerol-3-phosphate O-acyltransferase 9, like	ZDB-GENE-060531-19	CH211-155M12.4	ZDB-GENE-060531-19	protein_coding	ensembl_havana_gene	ENSDART00000046440.7	ENSDART00000046440
ENSDARG00000006494		NNN	0.985351	0.985351	1	1		ENSDARG00000006494.10	ankyrin repeat and SOCS box containing 7	ZDB-GENE-040426-2429	asb7	ZDB-GENE-040426-2429	protein_coding	ensembl_havana_gene	ENSDART00000006343.9	ENSDART00000006343
ENSDARG00000006497		NNN	0.999354	0.999354	1	1		ENSDARG00000006497.12	reticulon 1a	ZDB-GENE-030131-2426	rtn1a	ZDB-GENE-030131-2426	protein_coding	ensembl_havana_gene	ENSDART00000076574.6	ENSDART00000057441^ENSDART00000076571^ENSDART00000076574^ENSDART00000126860^ENSDART00000193268
ENSDARG00000006501		NNN	0.19613	0.529387	0.19613	0.682289		ENSDARG00000006501.13	cytochrome P450, family 2, subfamily X, polypeptide 10.2	ZDB-GENE-060818-12	cyp2x10.2	ZDB-GENE-060818-12	protein_coding	ensembl_havana_gene	ENSDART00000052054.8	ENSDART00000052054^ENSDART00000142042^ENSDART00000145645^ENSDART00000174102
ENSDARG00000006508		NNP	0.0358272	0.66038	0.0358272	0.999952		ENSDARG00000006508.10	phosphatidylinositol-4-phosphate 5-kinase, type I, beta b	ZDB-GENE-040912-141	CH211-204D2.2	ZDB-GENE-040912-141	protein_coding	ensembl_havana_gene	ENSDART00000008215.10	ENSDART00000008215
ENSDARG00000006514		NGG	0.0996218	0.0996218	0.403325	0.818716		ENSDARG00000006514.11	hairy-related 6	ZDB-GENE-980526-144	her6	ZDB-GENE-980526-144	protein_coding	ensembl_havana_gene	ENSDART00000023613.9	ENSDART00000023613^ENSDART00000135413
ENSDARG00000006522		NNN	0.223181	0.223181	0.596727	0.359323		ENSDARG00000006522.11	otopetrin 2	ZDB-GENE-050104-2	otop2	ZDB-GENE-050104-2	protein_coding	ensembl_havana_gene	ENSDART00000154408.2	ENSDART00000124728^ENSDART00000154408
ENSDARG00000006524		NNN	0.993238	0.993238	0.997904	0.999957		ENSDARG00000006524.8	SPT6 homolog, histone chaperone	ZDB-GENE-030131-7949	supt6h	ZDB-GENE-030131-7949	protein_coding	ensembl_havana_gene	ENSDART00000028007.7	ENSDART00000028007
ENSDARG00000006526		NBB	0.506021	0.506021	0.995137	0.992368		ENSDARG00000006526.12	fibronectin 1b	ZDB-GENE-030131-6545	fn1b	ZDB-GENE-030131-6545	protein_coding	ensembl_havana_gene	ENSDART00000103755.4	ENSDART00000103754^ENSDART00000103755^ENSDART00000126172^ENSDART00000144185^ENSDART00000160791
ENSDARG00000006527		NNN	0.995949	0.995949	0.999605	0.999911		ENSDARG00000006527.11	bromodomain containing 3a	ZDB-GENE-030131-6141	CH73-182I17.3	—	protein_coding	ensembl_havana_gene	ENSDART00000135239.3	ENSDART00000126672^ENSDART00000128915^ENSDART00000135239^ENSDART00000137050^ENSDART00000140037
ENSDARG00000006544		NNN	0.0671687	0.0671687	0.968721	0.992076		ENSDARG00000006544.7	C1q and TNF related 6b	ZDB-GENE-080411-1	—	—	protein_coding	ensembl	ENSDART00000008398.7	ENSDART00000008398
ENSDARG00000006545		NNN	0.755881	0.900575	0.755881	0.912068		ENSDARG00000006545.10	GP1 homolog, RAB6A GEF complex partner 1	ZDB-GENE-040718-352	rgp1	ZDB-GENE-040718-352	protein_coding	ensembl_havana_gene	ENSDART00000048921.7	ENSDART00000048921^ENSDART00000147342^ENSDART00000181037
ENSDARG00000006546		NBN	0.111455	0.132715	0.980096	0.111455		ENSDARG00000006546.9	adenylate kinase 4	ZDB-GENE-040426-2505	DKEY-202I2.1	ZDB-GENE-040426-2505	protein_coding	ensembl_havana_gene	ENSDART00000187738.1	ENSDART00000027550^ENSDART00000134370^ENSDART00000145715^ENSDART00000187738
ENSDARG00000006553		SBB	0.999317	0.999317	0.999999	0.999956		ENSDARG00000006553.11	RAS related	ZDB-GENE-041010-217	rras	ZDB-GENE-041010-217	protein_coding	ensembl_havana_gene	ENSDART00000025496.10	ENSDART00000025496^ENSDART00000139392^ENSDART00000141793^ENSDART00000141919^ENSDART00000186287
ENSDARG00000006560		NNN	0.936062	0.936062	0.993479	0.999672		ENSDARG00000006560.10	interferon regulatory factor 4a	ZDB-GENE-070912-330	irf4a	ZDB-GENE-070912-330	protein_coding	ensembl_havana_gene	ENSDART00000019733.8	ENSDART00000019733
ENSDARG00000006566		NNN	0.995005	0.995005	1	1		ENSDARG00000006566.11	nemo-like kinase, type 1	ZDB-GENE-040701-1	nlk1	ZDB-GENE-040701-1	protein_coding	ensembl_havana_gene	ENSDART00000109790.5	ENSDART00000109790^ENSDART00000153739^ENSDART00000184418
ENSDARG00000006567		NNN	0.0849324	0.963108	0.24519	0.0849324		ENSDARG00000006567.9	dihydrouridine synthase 4-like (S. cerevisiae)	ZDB-GENE-040801-233	dus4l	ZDB-GENE-040801-233	protein_coding	ensembl_havana_gene	ENSDART00000130623.4	ENSDART00000130623
ENSDARG00000006568		NNN	0.533694	0.964138	0.608304	0.533694		ENSDARG00000006568.7	potassium large conductance calcium-activated channel, subfamily M, beta member 2	ZDB-GENE-050320-97	kcnmb2	ZDB-GENE-050320-97	protein_coding	ensembl_havana_gene	ENSDART00000007068.7	ENSDART00000007068
ENSDARG00000006577		SPP	1	1	1	1		ENSDARG00000006577.11	NAD kinase a	ZDB-GENE-050417-39	CH73-96J22.2	ZDB-GENE-050417-39	protein_coding	havana	ENSDART00000131514.3	ENSDART00000131514
ENSDARG00000006580		NNN	0.376318	0.376318	0.924639	0.767342		ENSDARG00000006580.9	claudin d	ZDB-GENE-010328-4	cldnd	ZDB-GENE-010328-4	protein_coding	ensembl_havana_gene	ENSDART00000021620.7	ENSDART00000021620
ENSDARG00000006584		NNN	0.996588	0.996588	1	1		ENSDARG00000006584.10	PHD finger protein 8	ZDB-GENE-060419-1	DKEY-166N8.6	—	protein_coding	ensembl_havana_gene	ENSDART00000183639.1	ENSDART00000026314^ENSDART00000183639
ENSDARG00000006585		NNN	0.909131	0.909131	0.999991	0.999999		ENSDARG00000006585.9	zmp:0000000529	ZDB-GENE-130530-532	—	—	protein_coding	ensembl	ENSDART00000027060.9	ENSDART00000027060^ENSDART00000192584
ENSDARG00000006588		SPP	1	1	1	1		ENSDARG00000006588.9	zgc:111983	ZDB-GENE-050417-335	CH211-239F4.3	—	protein_coding	ensembl_havana_gene	ENSDART00000034549.7	ENSDART00000034549^ENSDART00000136995^ENSDART00000143142
ENSDARG00000006598		NNN	0.099362	0.817614	0.099362	0.249918		ENSDARG00000006598.9	serum/glucocorticoid regulated kinase 2b	ZDB-GENE-060929-44	DKEY-108F8.3	ZDB-GENE-060929-44	protein_coding	ensembl_havana_gene	ENSDART00000008152.9	ENSDART00000008152^ENSDART00000132060^ENSDART00000134908
ENSDARG00000006600		NNN	0.0559349	0.957112	0.183213	0.0559349		ENSDARG00000006600.10	LSM14A mRNA processing body assembly factor a	ZDB-GENE-040426-1567	lsm14a	ZDB-GENE-040426-1567	protein_coding	ensembl_havana_gene	ENSDART00000023453.9	ENSDART00000023453^ENSDART00000125821^ENSDART00000135441^ENSDART00000147093
ENSDARG00000006601		NNN	0.117491	0.814348	0.117491	0.583373		ENSDARG00000006601.12	kazrin, periplakin interacting protein b	ZDB-GENE-061215-31	DKEY-17E11.1	ZDB-GENE-061215-31	protein_coding	ensembl_havana_gene	ENSDART00000144115.3	ENSDART00000122011^ENSDART00000144115^ENSDART00000170838^ENSDART00000173597
ENSDARG00000006602		NNN	0.990192	0.994119	0.990192	0.999563		ENSDARG00000006602.8	cholinergic receptor, nicotinic, alpha 2a (neuronal)	ZDB-GENE-040108-2	chrna2a	ZDB-GENE-040108-2	protein_coding	ensembl_havana_gene	ENSDART00000033947.7	ENSDART00000033947
ENSDARG00000006603		SGG	0.0673038	0.999954	0.115704	0.0673038		ENSDARG00000006603.9	cysteine and glycine-rich protein 1a	ZDB-GENE-030909-4	csrp1	ZDB-GENE-030909-4	protein_coding	ensembl_havana_gene	ENSDART00000019455.8	ENSDART00000019455^ENSDART00000131521^ENSDART00000148730
ENSDARG00000006604		NNN	0.304024	0.304024	0.859519	0.682863		ENSDARG00000006604.11	nectin cell adhesion molecule 3b	ZDB-GENE-050327-14	DKEY-62A13.5	ZDB-GENE-050327-14	protein_coding	ensembl_havana_gene	ENSDART00000147593.3	ENSDART00000031205^ENSDART00000141487^ENSDART00000147593
ENSDARG00000006607		NNN	0.987211	0.987211	1	1		ENSDARG00000006607.8	G protein-coupled receptor 27	ZDB-GENE-071022-3	gpr27	ZDB-GENE-071022-3	protein_coding	ensembl_havana_gene	ENSDART00000006435.8	ENSDART00000006435
ENSDARG00000006609		NNG	0.0211122	0.245678	0.0211122	0.673215		ENSDARG00000006609.10	mitogen-activated protein kinase kinase 2a	ZDB-GENE-041027-1	map2k2a	ZDB-GENE-041027-1	protein_coding	ensembl_havana_gene	ENSDART00000010048.8	ENSDART00000010048
ENSDARG00000006615		NNN	0.675727	0.999442	0.998905	0.675727		ENSDARG00000006615.11	HNF1 homeobox Ba	ZDB-GENE-020104-1	hnf1b	ZDB-GENE-020104-1	protein_coding	ensembl_havana_gene	ENSDART00000144138.3	ENSDART00000144138
ENSDARG00000006617		NNN	0.500041	0.667079	0.500041	0.848602		ENSDARG00000006617.8	N-ethylmaleimide-sensitive factor attachment protein, gamma a	ZDB-GENE-050320-46	napgl	ZDB-GENE-050320-46	protein_coding	ensembl_havana_gene	ENSDART00000063151.6	ENSDART00000063151
ENSDARG00000006621		NNN	0.977356	0.977356	0.999996	1		ENSDARG00000006621.11	paraspeckle component 1	ZDB-GENE-030131-9530	pspc1	ZDB-GENE-030131-9530	protein_coding	ensembl_havana_gene	ENSDART00000102335.5	ENSDART00000102335^ENSDART00000160524
ENSDARG00000006624		NNN	0.982235	0.982235	0.989845	0.999553		ENSDARG00000006624.12	protein phosphatase 2, regulatory subunit B, alpha b	ZDB-GENE-030131-5474	ppp2r2d	—	protein_coding	ensembl_havana_gene	ENSDART00000138334.3	ENSDART00000024127^ENSDART00000138334^ENSDART00000144860
ENSDARG00000006636		NNN	0.999969	0.999969	0.999994	1		ENSDARG00000006636.9	SLIT and NTRK-like family, member 2	ZDB-GENE-080327-7	slitrk2	ZDB-GENE-080327-7	protein_coding	ensembl_havana_gene	ENSDART00000005738.9	ENSDART00000005738^ENSDART00000187087
ENSDARG00000006639		NNN	0.60318	0.876126	0.60318	0.983544		ENSDARG00000006639.12	lunapark, ER junction formation factor	ZDB-GENE-030131-9455	DKEY-91G17.3	ZDB-GENE-030131-9455	protein_coding	ensembl_havana_gene	ENSDART00000133893.3	ENSDART00000014521^ENSDART00000133893^ENSDART00000135454^ENSDART00000164342
ENSDARG00000006640		NNN	0.999518	0.999518	1	1		ENSDARG00000006640.8	eomesodermin homolog a	ZDB-GENE-001228-1	—	—	protein_coding	ensembl	ENSDART00000186626.1	ENSDART00000007206^ENSDART00000122257^ENSDART00000186626
ENSDARG00000006642		NNN	0.0222758	0.97736	0.0222758	0.0560384		ENSDARG00000006642.8	developmentally regulated GTP binding protein 2	ZDB-GENE-040808-29	drg2	—	protein_coding	ensembl_havana_gene	ENSDART00000025285.7	ENSDART00000025285^ENSDART00000129664^ENSDART00000141963
ENSDARG00000006666		NNN	0.999782	0.999782	0.999979	0.999999		ENSDARG00000006666.9	si:dkeyp-69c1.6	ZDB-GENE-030131-6333	DKEYP-69C1.6	ZDB-GENE-030131-6333	protein_coding	ensembl_havana_gene	ENSDART00000065544.6	ENSDART00000065544
ENSDARG00000006672		NNN	0.263967	0.997554	0.389082	0.263967		ENSDARG00000006672.12	family with sequence similarity 49, member A	ZDB-GENE-031002-50	znf395	ZDB-GENE-031002-50	protein_coding	ensembl_havana_gene	ENSDART00000137915.3	ENSDART00000002773^ENSDART00000131974^ENSDART00000137915^ENSDART00000147320^ENSDART00000153070^ENSDART00000153332^ENSDART00000153425^ENSDART00000168216^ENSDART00000187199
ENSDARG00000006677		SGG	0.764308	0.993564	0.764308	0.807901		ENSDARG00000006677.11	receptor (TNFRSF)-interacting serine-threonine kinase 1, like	ZDB-GENE-070705-132	ripk1l	ZDB-GENE-070705-132	protein_coding	ensembl_havana_gene	ENSDART00000024967.10	ENSDART00000024967
ENSDARG00000006678		SNN	0.785141	0.996367	0.785141	0.999996		ENSDARG00000006678.9	parathyroid hormone 2 receptor	ZDB-GENE-991123-10	pthr2	ZDB-GENE-991123-10	protein_coding	ensembl_havana_gene	ENSDART00000014047.8	ENSDART00000014047^ENSDART00000122602^ENSDART00000158689
ENSDARG00000006683		NNG	0.0218564	0.227066	0.0218564	0.300052		ENSDARG00000006683.11	Rac/Cdc42 guanine nucleotide exchange factor (GEF) 6	ZDB-GENE-101013-2	arhgef6	ZDB-GENE-101013-2	protein_coding	ensembl_havana_gene	ENSDART00000003345.9	ENSDART00000003345^ENSDART00000148550^ENSDART00000173393
ENSDARG00000006691		NNN	0.0934069	0.924656	0.168026	0.0934069		ENSDARG00000006691.9	ribosomal protein L12	ZDB-GENE-030131-5297	rpl12	—	protein_coding	ensembl_havana_gene	ENSDART00000008807.8	ENSDART00000008807^ENSDART00000135459^ENSDART00000141676^ENSDART00000144695^ENSDART00000185317
ENSDARG00000006712		NNN	0.999904	0.999904	1	1		ENSDARG00000006712.7	WAS/WASL interacting protein family, member 2b	ZDB-GENE-040625-182	—	—	protein_coding	ensembl	ENSDART00000011025.7	ENSDART00000011025
ENSDARG00000006719		NNN	0.934333	0.999454	0.934333	0.960592		ENSDARG00000006719.9	sperm antigen with calponin homology and coiled-coil domains 1-like a	ZDB-GENE-060810-139	DKEY-118G10.1	—	protein_coding	ensembl_havana_gene	ENSDART00000014046.8	ENSDART00000014046^ENSDART00000164976
ENSDARG00000006747		NNN	1	1	1	1		ENSDARG00000006747.10	transmembrane protein 178B	ZDB-GENE-040718-92	CH211-9F20.1	ZDB-GENE-040718-92	protein_coding	ensembl_havana_gene	ENSDART00000036779.8	ENSDART00000036779^ENSDART00000182399
ENSDARG00000006754		NNN	0.638295	0.999997	0.638295	0.999975		ENSDARG00000006754.13	MLLT3, super elongation complex subunit	ZDB-GENE-050417-356	mllt3	ZDB-GENE-050417-356	protein_coding	ensembl_havana_gene	ENSDART00000021502.9	ENSDART00000021502^ENSDART00000113593^ENSDART00000146181
ENSDARG00000006757		NNN	0.567492	0.99824	0.567492	0.583931		ENSDARG00000006757.7	kelch-like family member 41b	ZDB-GENE-030131-9875	—	—	protein_coding	ensembl	ENSDART00000013588.7	ENSDART00000013588
ENSDARG00000006758		NNN	0.99918	0.99918	0.999866	1		ENSDARG00000006758.10	family with sequence similarity 234, member B	ZDB-GENE-030131-3308	CH73-211L13.6	ZDB-GENE-030131-3308	protein_coding	ensembl_havana_gene	ENSDART00000089646.6	ENSDART00000089646
ENSDARG00000006760		NNN	0.0396915	0.0396915	0.954386	0.994795		ENSDARG00000006760.10	solute carrier family 24 (sodium/potassium/calcium exchanger), member 3	ZDB-GENE-090312-67	DKEY-187A12.3	—	protein_coding	ensembl_havana_gene	ENSDART00000146227.2	ENSDART00000146227
ENSDARG00000006766		NGN	0.105007	0.581553	0.335242	0.105007		ENSDARG00000006766.11	staphylococcal nuclease and tudor domain containing 1	ZDB-GENE-030131-3124	snd1	ZDB-GENE-030131-3124	protein_coding	ensembl_havana_gene	ENSDART00000040405.8	ENSDART00000040405^ENSDART00000100974
ENSDARG00000006773		NNN	0.999994	0.999994	1	1		ENSDARG00000006773.9	ELOVL fatty acid elongase 4a	ZDB-GENE-040426-1767	elovl4a	ZDB-GENE-040426-1767	protein_coding	ensembl_havana_gene	ENSDART00000012053.9	ENSDART00000012053
ENSDARG00000006775		NNN	0.960565	0.960565	0.999406	0.999769		ENSDARG00000006775.11	Cas scaffolding protein family member 4	ZDB-GENE-110131-9	cass4	ZDB-GENE-110131-9	protein_coding	havana	ENSDART00000023823.11	ENSDART00000023823
ENSDARG00000006782		NGG	0.736655	0.977711	0.829415	0.736655		ENSDARG00000006782.11	retinoblastoma 1	ZDB-GENE-040428-1	rb1	ZDB-GENE-040428-1	protein_coding	ensembl_havana_gene	ENSDART00000024309.10	ENSDART00000024309
ENSDARG00000006786		SGG	0.166392	0.99798	0.166392	0.643433		ENSDARG00000006786.12	coatomer protein complex, subunit zeta 2	ZDB-GENE-000406-5	copz2	—	protein_coding	ensembl_havana_gene	ENSDART00000138270.3	ENSDART00000131509^ENSDART00000138270^ENSDART00000139181
ENSDARG00000006791		NNN	0.0293445	0.430903	0.0293445	0.708937		ENSDARG00000006791.11	aryl hydrocarbon receptor nuclear translocator-like 1a	ZDB-GENE-000509-1	arntl1a	ZDB-GENE-000509-1	protein_coding	ensembl_havana_gene	ENSDART00000023959.10	ENSDART00000023959^ENSDART00000148660^ENSDART00000191586
ENSDARG00000006797		NNN	0.970799	0.970799	0.97797	0.997769		ENSDARG00000006797.11	5'-nucleotidase domain containing 1	ZDB-GENE-030131-8274	nt5dc1	ZDB-GENE-030131-8274	protein_coding	ensembl_havana_gene	ENSDART00000026794.9	ENSDART00000026794^ENSDART00000138585
ENSDARG00000006811		NGP	0.0718504	0.196464	0.0718504	0.99658		ENSDARG00000006811.9	sulfotransferase family 1, cytosolic sulfotransferase 6	ZDB-GENE-040718-343	sult1st6	ZDB-GENE-040718-343	protein_coding	ensembl_havana_gene	ENSDART00000010068.9	ENSDART00000010068
ENSDARG00000006812		NNN	0.461164	0.461164	0.92499	0.976742		ENSDARG00000006812.10	WD repeat domain 26b	ZDB-GENE-041014-277	wdr26b	ZDB-GENE-041014-277	protein_coding	ensembl_havana_gene	ENSDART00000029894.8	ENSDART00000029894^ENSDART00000167398
ENSDARG00000006816		NNN	0.193824	0.548695	0.193824	0.599132		ENSDARG00000006816.7	general transcription factor IIF, polypeptide 2b	ZDB-GENE-050417-374	DKEY-239H2.1	ZDB-GENE-050417-374	protein_coding	ensembl_havana_gene	ENSDART00000006514.7	ENSDART00000006514
ENSDARG00000006818		NNN	0.99996	1	1	0.99996		ENSDARG00000006818.8	uroporphyrinogen decarboxylase	ZDB-GENE-000208-18	urod	ZDB-GENE-000208-18	protein_coding	ensembl_havana_gene	ENSDART00000014568.7	ENSDART00000014568
ENSDARG00000006832		NNN	0.915547	0.915547	1	1		ENSDARG00000006832.11	polypeptide N-acetylgalactosaminyltransferase 9	ZDB-GENE-060526-21	CH211-126H20.1	—	protein_coding	ensembl_havana_gene	ENSDART00000038740.9	ENSDART00000038740^ENSDART00000144501^ENSDART00000147101
ENSDARG00000006837		NNN	0.284138	0.999333	0.284138	0.71688		ENSDARG00000006837.9	MYCN proto-oncogene, bHLH transcription factor	ZDB-GENE-020711-1	mycn	ZDB-GENE-020711-1	protein_coding	ensembl_havana_gene	ENSDART00000024104.7	ENSDART00000024104
ENSDARG00000006838		NNN	0.539091	0.539091	0.862927	0.882183		ENSDARG00000006838.7	eukaryotic translation elongation factor 1 alpha 2	ZDB-GENE-040718-64	DKEY-103A3.2	ZDB-GENE-040718-64	protein_coding	ensembl_havana_gene	ENSDART00000010119.7	ENSDART00000010119
ENSDARG00000006840		NBG	0.0269362	0.466757	0.989757	0.0269362		ENSDARG00000006840.7	glycine N-methyltransferase	ZDB-GENE-040227-1	—	—	protein_coding	ensembl	ENSDART00000024379.7	ENSDART00000024379
ENSDARG00000006848		NPP	0.871504	0.871504	0.99629	0.990329		ENSDARG00000006848.10	si:ch211-219a4.6	ZDB-GENE-081104-179	CH211-219A4.6	—	protein_coding	ensembl_havana_gene	ENSDART00000090486.6	ENSDART00000027212^ENSDART00000090486
ENSDARG00000006849		NNN	0.237063	0.237063	0.99988	1		ENSDARG00000006849.12	acid-sensing (proton-gated) ion channel 2	ZDB-GENE-040513-4	accn1	ZDB-GENE-040513-4	protein_coding	ensembl_havana_gene	ENSDART00000137038.4	ENSDART00000039517^ENSDART00000137038
ENSDARG00000006859		NNN	0.999658	0.999658	1	1		ENSDARG00000006859.10	sodium/potassium transporting ATPase interacting 1	ZDB-GENE-040426-1472	nkain1	ZDB-GENE-040426-1472	protein_coding	ensembl_havana_gene	ENSDART00000015632.9	ENSDART00000015632^ENSDART00000132213^ENSDART00000150901^ENSDART00000182608
ENSDARG00000006862		NNN	1	1	1	1		ENSDARG00000006862.12	kinesin-associated protein 3b	ZDB-GENE-030131-2219	kifap3	ZDB-GENE-030131-2219	protein_coding	ensembl_havana_gene	ENSDART00000026800.11	ENSDART00000026800^ENSDART00000142434
ENSDARG00000006863		NNN	0.388757	0.989073	0.850844	0.388757		ENSDARG00000006863.10	si:ch1073-349o24.2	ZDB-GENE-081104-83	CH1073-349O24.2	—	protein_coding	havana	ENSDART00000145853.3	ENSDART00000145853
ENSDARG00000006865		NNN	0.661335	0.661335	0.972513	0.99943		ENSDARG00000006865.11	glycine receptor, alpha 4a	ZDB-GENE-010410-3	glra4a	ZDB-GENE-010410-3	protein_coding	ensembl_havana_gene	ENSDART00000030509.10	ENSDART00000026194^ENSDART00000030509^ENSDART00000131947
ENSDARG00000006868		NNN	0.892637	0.892637	1	1		ENSDARG00000006868.9	thyrotropin-releasing hormone	ZDB-GENE-020930-1	—	—	protein_coding	ensembl	ENSDART00000018054.9	ENSDART00000018054
ENSDARG00000006869		NNG	0.0840032	0.908086	0.0840032	0.685586		ENSDARG00000006869.8	syntaxin 17	ZDB-GENE-041114-164	CH211-192F15.1	ZDB-GENE-041114-164	protein_coding	ensembl_havana_gene	ENSDART00000132329.3	ENSDART00000132329^ENSDART00000136256
ENSDARG00000006877		SPG	0.0739581	0.98092	0.98824	0.0739581		ENSDARG00000006877.8	ectonucleotide pyrophosphatase/phosphodiesterase 4	ZDB-GENE-050417-444	enpp4	ZDB-GENE-050417-444	protein_coding	ensembl_havana_gene	ENSDART00000004043.6	ENSDART00000004043
ENSDARG00000006878		NNN	0.979198	0.979198	1	1		ENSDARG00000006878.14	PHD finger protein 21Aa	ZDB-GENE-050208-99	phf21aa	ZDB-GENE-050208-99	protein_coding	ensembl_havana_gene	ENSDART00000037361.10	ENSDART00000037361^ENSDART00000133486^ENSDART00000133491^ENSDART00000173629^ENSDART00000173953
ENSDARG00000006889		NNN	1	1	1	1		ENSDARG00000006889.14	metallophosphoesterase domain containing 2a	ZDB-GENE-050417-241	mpped2a	ZDB-GENE-050417-241	protein_coding	ensembl_havana_gene	ENSDART00000002449.13	ENSDART00000002449^ENSDART00000158972
ENSDARG00000006891		NNN	0.819384	0.819384	0.998609	0.99979		ENSDARG00000006891.6	potassium voltage-gated channel, delayed-rectifier, subfamily S, member 3a	ZDB-GENE-080723-45	CH211-206K20.3	ZDB-GENE-080723-41	protein_coding	ensembl_havana_gene	ENSDART00000016535.6	ENSDART00000016535
ENSDARG00000006892		NNN	0.923322	1	0.976686	0.923322		ENSDARG00000006892.10	myosin IIIB	ZDB-GENE-070706-2	DKEY-249G23.4	DKEY-249G23.1	protein_coding	ensembl_havana_gene	ENSDART00000010378.8	ENSDART00000010378^ENSDART00000141492
ENSDARG00000006894		NNN	0.425405	0.425405	0.999606	0.999924		ENSDARG00000006894.6	opioid receptor, kappa 1	ZDB-GENE-030729-1	oprk1	ZDB-GENE-030729-1	protein_coding	ensembl_havana_gene	ENSDART00000009326.5	ENSDART00000009326
ENSDARG00000006896		NNN	0.853098	0.853098	0.999977	0.999985		ENSDARG00000006896.8	LIM homeobox 6	ZDB-GENE-041025-1	lhx6	ZDB-GENE-041025-1	protein_coding	ensembl_havana_gene	ENSDART00000021100.7	ENSDART00000021100
ENSDARG00000006899		NPP	0.533693	0.533693	0.998588	0.999844		ENSDARG00000006899.11	fatty acyl CoA reductase 1	ZDB-GENE-040426-2908	mlstd2	ZDB-GENE-040426-2908	protein_coding	ensembl_havana_gene	ENSDART00000165598.2	ENSDART00000061753^ENSDART00000139778^ENSDART00000142564^ENSDART00000146350^ENSDART00000146604^ENSDART00000165598
ENSDARG00000006900		NNN	0.993245	0.999992	0.99991	0.993245		ENSDARG00000006900.10	IMP (inosine 5'-monophosphate) dehydrogenase 2	ZDB-GENE-030114-5	impdh2	—	protein_coding	ensembl_havana_gene	ENSDART00000009178.9	ENSDART00000009178
ENSDARG00000006901		NNN	0.990838	0.999985	0.992094	0.990838		ENSDARG00000006901.9	si:ch1073-459j12.1	ZDB-GENE-030131-8546	CH1073-459J12.2	—	protein_coding	ensembl_havana_gene	ENSDART00000132115.2	ENSDART00000025875^ENSDART00000132115
ENSDARG00000006911		NNN	0.904857	0.904857	0.999	0.999997		ENSDARG00000006911.6	wingless-type MMTV integration site family, member 8b	ZDB-GENE-990415-279	wnt8b	ZDB-GENE-990415-279	protein_coding	ensembl_havana_gene	ENSDART00000049624.4	ENSDART00000049624
ENSDARG00000006915		NNN	0.171376	0.999187	0.534772	0.171376		ENSDARG00000006915.10	ADP-ribosylation factor-like 8Ba	ZDB-GENE-030131-9370	arl8ba	ZDB-GENE-030131-9370	protein_coding	ensembl_havana_gene	ENSDART00000014552.9	ENSDART00000014552^ENSDART00000150508
ENSDARG00000006921		NNN	0.0219815	0.962641	0.307658	0.0219815		ENSDARG00000006921.12	low density lipoprotein receptor-related protein 5	ZDB-GENE-050518-2	—	—	protein_coding	ensembl	ENSDART00000121724.4	ENSDART00000121724^ENSDART00000184490^ENSDART00000186758
ENSDARG00000006923		NNN	0.99618	0.99618	0.999998	1		ENSDARG00000006923.11	calcium channel, voltage-dependent, P/Q type, alpha 1A subunit, b	ZDB-GENE-090514-3	cacna1ab	ZDB-GENE-090514-3	protein_coding	ensembl_havana_gene	ENSDART00000159997.2	ENSDART00000148949^ENSDART00000149273^ENSDART00000149597^ENSDART00000149943^ENSDART00000150130^ENSDART00000159997
ENSDARG00000006924		NNN	0.991302	0.991302	0.999918	0.999717		ENSDARG00000006924.10	F-box protein 38	ZDB-GENE-030131-2797	fbxo38	ZDB-GENE-030131-2797	protein_coding	ensembl_havana_gene	ENSDART00000020625.10	ENSDART00000020625^ENSDART00000185861^ENSDART00000186197
ENSDARG00000006939		NNN	1	1	1	1		ENSDARG00000006939.10	T-box 6, like	ZDB-GENE-980526-171	tbx6	ZDB-GENE-980526-171	protein_coding	ensembl_havana_gene	ENSDART00000142855.2	ENSDART00000142855
ENSDARG00000006944		NNN	0.225679	0.980522	0.896945	0.225679		ENSDARG00000006944.7	glycerophosphodiester phosphodiesterase domain containing 3b	ZDB-GENE-121210-2	CH211-136M16.7	—	protein_coding	ensembl_havana_gene	ENSDART00000041082.5	ENSDART00000041082^ENSDART00000184214
ENSDARG00000006963		NNN	0.831984	0.999748	0.831984	0.979339		ENSDARG00000006963.9	CSE1 chromosome segregation 1-like (yeast)	ZDB-GENE-990603-1	—	—	protein_coding	ensembl	ENSDART00000013203.9	ENSDART00000013203
ENSDARG00000006978		NGG	0.327187	0.327187	0.546135	0.535452		ENSDARG00000006978.12	sterile alpha motif and leucine zipper containing kinase AZK	ZDB-GENE-070912-386	DKEY-15I8.3	—	protein_coding	ensembl_havana_gene	ENSDART00000183452.1	ENSDART00000102823^ENSDART00000183452
ENSDARG00000006981		NNN	0.551664	0.937901	0.837372	0.551664		ENSDARG00000006981.9	coiled-coil domain containing 113	ZDB-GENE-041010-163	ccdc113	ZDB-GENE-041010-163	protein_coding	ensembl_havana_gene	ENSDART00000008989.9	ENSDART00000008989
ENSDARG00000006983		NNN	0.991573	0.991573	1	1		ENSDARG00000006983.10	cugbp, Elav-like family member 3b	ZDB-GENE-110408-50	CH211-167H2.2	—	protein_coding	ensembl_havana_gene	ENSDART00000024206.9	ENSDART00000024206^ENSDART00000148426
ENSDARG00000006990		NNN	0.993561	0.993561	0.999982	1		ENSDARG00000006990.9	cysteine-rich with EGF-like domains 1b	ZDB-GENE-161219-1	—	—	protein_coding	ensembl	ENSDART00000020569.9	ENSDART00000020569
ENSDARG00000007009		NNN	0.992065	0.992065	0.999148	0.999992		ENSDARG00000007009.6	homeobox A11b	ZDB-GENE-990415-4	hoxa11b	ZDB-GENE-990415-4	protein_coding	ensembl_havana_gene	ENSDART00000006043.6	ENSDART00000006043
ENSDARG00000007018		NBN	0.513059	0.81028	0.982088	0.513059		ENSDARG00000007018.10	membrane-spanning 4-domains, subfamily A, member 17A.6	ZDB-GENE-070209-265	ms4a17a.6	ZDB-GENE-070209-265	protein_coding	ensembl_havana_gene	ENSDART00000075602.5	ENSDART00000075602^ENSDART00000174283
ENSDARG00000007024		SNN	0.618726	1	0.618726	1		ENSDARG00000007024.8	urate oxidase	ZDB-GENE-030826-24	uox	ZDB-GENE-040718-17	protein_coding	ensembl_havana_gene	ENSDART00000146940.3	ENSDART00000024046^ENSDART00000133574^ENSDART00000146940
ENSDARG00000007025		NNN	0.26159	0.687411	0.298649	0.26159		ENSDARG00000007025.8	tetratricopeptide repeat domain 9C	ZDB-GENE-040426-1053	CH211-168F7.2	ZDB-GENE-040426-1053	protein_coding	ensembl_havana_gene	ENSDART00000025749.8	ENSDART00000025749
ENSDARG00000007034		NNN	0.836584	0.836584	0.999806	0.999974		ENSDARG00000007034.12	heterogeneous nuclear ribonucleoprotein K, like	ZDB-GENE-040426-1923	hnrpkl	ZDB-GENE-040426-1923	protein_coding	ensembl_havana_gene	ENSDART00000133156.3	ENSDART00000005671^ENSDART00000132290^ENSDART00000133156^ENSDART00000139236^ENSDART00000142912^ENSDART00000176341
ENSDARG00000007040		NNN	0.816515	0.816515	0.843979	0.982351		ENSDARG00000007040.10	transmembrane and immunoglobulin domain containing 1	ZDB-GENE-080303-6	—	—	protein_coding	ensembl	ENSDART00000180010.1	ENSDART00000024407^ENSDART00000180010
ENSDARG00000007045		NNN	0.831117	0.841351	0.831117	0.895641		ENSDARG00000007045.11	CCR4-NOT transcription complex, subunit 4a	ZDB-GENE-090313-262	DKEY-230E6.2	—	protein_coding	ensembl_havana_gene	ENSDART00000174776.2	ENSDART00000140182^ENSDART00000174776
ENSDARG00000007065		NNN	0.996034	0.998993	0.996034	0.99708		ENSDARG00000007065.8	mitochondrial ribosomal protein S18B	ZDB-GENE-050417-278	CH211-215A10.7	—	protein_coding	ensembl_havana_gene	ENSDART00000023074.8	ENSDART00000023074
ENSDARG00000007067		NNN	0.187544	0.935762	0.187544	0.31746		ENSDARG00000007067.10	si:dkey-19a16.16	ZDB-GENE-141212-322	DKEY-19A16.16	—	protein_coding	havana	ENSDART00000009590.10	ENSDART00000009590
ENSDARG00000007077		NGG	0.0417874	0.0417874	0.668574	0.536555		ENSDARG00000007077.8	si:dkey-145p14.5	ZDB-GENE-041008-117	DKEY-145P14.5	—	protein_coding	ensembl_havana_gene	ENSDART00000168992.2	ENSDART00000020798^ENSDART00000121751^ENSDART00000168992
ENSDARG00000007080		NNP	0.0465401	0.376529	0.0465401	0.995221		ENSDARG00000007080.9	Rh family, C glycoprotein, like 1	ZDB-GENE-060209-2	rhcgl1	ZDB-GENE-060209-2	protein_coding	ensembl_havana_gene	ENSDART00000004727.8	ENSDART00000004727
ENSDARG00000007081		NNN	0.99973	0.99973	0.999999	1		ENSDARG00000007081.10	protein inhibitor of activated STAT, 4a	ZDB-GENE-040426-2734	pias4a	ZDB-GENE-040426-2734	protein_coding	ensembl_havana_gene	ENSDART00000105520.4	ENSDART00000105520
ENSDARG00000007086		SPP	0.999235	0.999235	1	1		ENSDARG00000007086.11	aquaporin 10a	ZDB-GENE-040718-40	DKEY-92I15.1	ZDB-GENE-040718-40	protein_coding	ensembl_havana_gene	ENSDART00000124718.3	ENSDART00000124718
ENSDARG00000007092		NNN	0.574816	0.998302	0.574816	0.859211		ENSDARG00000007092.5	XPA binding protein 2	ZDB-GENE-040426-685	xab2	ZDB-GENE-040426-685	protein_coding	ensembl_havana_gene	ENSDART00000011780.5	ENSDART00000011780
ENSDARG00000007097		NNN	0.960965	0.960965	0.999579	0.999916		ENSDARG00000007097.8	hairy-related 13	ZDB-GENE-050228-1	her13	ZDB-GENE-050228-1	protein_coding	ensembl_havana_gene	ENSDART00000109394.3	ENSDART00000109394
ENSDARG00000007098		NGG	0.10973	0.10973	0.919455	0.726717		ENSDARG00000007098.9	integral membrane protein 2Ba	ZDB-GENE-030131-2352	itm2ba	ZDB-GENE-030131-2352	protein_coding	ensembl_havana_gene	ENSDART00000028008.9	ENSDART00000028008
ENSDARG00000007099		NNN	0.0226336	0.997643	0.635585	0.0226336		ENSDARG00000007099.9	connexin 43.4	ZDB-GENE-990415-38	cx43.4	ZDB-GENE-990415-38	protein_coding	ensembl_havana_gene	ENSDART00000009790.9	ENSDART00000009790
ENSDARG00000007108		SGG	0.0327971	0.999601	0.0327971	0.212906		ENSDARG00000007108.8	lipase, member Ia	ZDB-GENE-040801-242	DKEY-71D15.1	ZDB-GENE-040801-242	protein_coding	ensembl_havana_gene	ENSDART00000023838.8	ENSDART00000023838^ENSDART00000135222
ENSDARG00000007125		NNN	0.94713	0.992671	0.96104	0.94713		ENSDARG00000007125.11	ankyrin repeat and SOCS box containing 6	ZDB-GENE-050522-338	CH211-255G12.3	CH211-255G12.3-001;ZDB-GENE-050522-338	protein_coding	ensembl_havana_gene	ENSDART00000014915.8	ENSDART00000014915^ENSDART00000138259^ENSDART00000142496
ENSDARG00000007127		NNN	0.94617	0.94617	0.995628	0.999933		ENSDARG00000007127.11	acetyl-CoA acetyltransferase 2	ZDB-GENE-990714-22	acat2	ZDB-GENE-990714-22	protein_coding	ensembl_havana_gene	ENSDART00000006778.9	ENSDART00000006778^ENSDART00000146376
ENSDARG00000007129		NNN	0.60192	0.957003	0.986912	0.60192		ENSDARG00000007129.11	solute carrier family 6, member 16a	ZDB-GENE-061009-43	DKEY-29B22.6	—	protein_coding	ensembl_havana_gene	ENSDART00000080771.5	ENSDART00000080771^ENSDART00000131221^ENSDART00000132869
ENSDARG00000007130		NGN	0.0412285	0.999972	0.148527	0.0412285		ENSDARG00000007130.8	MRT4 homolog, ribosome maturation factor	ZDB-GENE-050417-142	—	—	protein_coding	ensembl	ENSDART00000002556.8	ENSDART00000002556
ENSDARG00000007135		NNN	0.994644	0.994644	0.99986	0.999996		ENSDARG00000007135.10	CCR4-NOT transcription complex, subunit 3a	ZDB-GENE-040927-6	cnot3a	ZDB-GENE-040927-6	protein_coding	ensembl_havana_gene	ENSDART00000102100.3	ENSDART00000102100^ENSDART00000133068^ENSDART00000137699
ENSDARG00000007136		NNN	0.995081	0.995081	0.999845	0.99967		ENSDARG00000007136.10	general transcription factor IIH, polypeptide 4	ZDB-GENE-030131-6779	CH211-225N7.1	ZDB-GENE-060503-310	protein_coding	ensembl_havana_gene	ENSDART00000141203.3	ENSDART00000141203^ENSDART00000151047^ENSDART00000176885
ENSDARG00000007141		NNN	0.265344	0.986925	0.28511	0.265344		ENSDARG00000007141.12	proteasome 26S subunit, ATPase 3	ZDB-GENE-030131-666	psmc3	ZDB-GENE-030131-666	protein_coding	ensembl_havana_gene	ENSDART00000007913.12	ENSDART00000007913^ENSDART00000171691^ENSDART00000173478
ENSDARG00000007149		NNN	0.999975	0.999975	1	1		ENSDARG00000007149.11	L1 cell adhesion molecule, paralog a	ZDB-GENE-990415-10	nadl1.2	ZDB-GENE-990415-10	protein_coding	ensembl_havana_gene	ENSDART00000020296.7	ENSDART00000020296^ENSDART00000189096
ENSDARG00000007151		NNN	0.99574	0.99574	0.998502	1		ENSDARG00000007151.11	potassium channel, subfamily K, member 2b	ZDB-GENE-051120-69	kcnk2b	ZDB-GENE-051120-69	protein_coding	ensembl_havana_gene	ENSDART00000046438.7	ENSDART00000046438
ENSDARG00000007169		NNN	0.125327	0.998814	0.125327	0.663146		ENSDARG00000007169.8	integrin beta 1 binding protein 1	ZDB-GENE-051113-264	itgb1bp1	ZDB-GENE-051113-264	protein_coding	ensembl_havana_gene	ENSDART00000005784.8	ENSDART00000005784^ENSDART00000135414
ENSDARG00000007171		NNN	0.949765	0.949765	0.999989	1		ENSDARG00000007171.9	androgen-induced 1 (H. sapiens)	ZDB-GENE-041014-358	aig1	ZDB-GENE-041014-358	protein_coding	ensembl_havana_gene	ENSDART00000138539.4	ENSDART00000007253^ENSDART00000138539
ENSDARG00000007172		NNN	0.663688	0.663688	1	1		ENSDARG00000007172.10	plexin A3	ZDB-GENE-070613-1	plxna3	ZDB-GENE-070613-1	protein_coding	ensembl_havana_gene	ENSDART00000044000.7	ENSDART00000044000
ENSDARG00000007175		NNN	0.709007	0.999631	0.824994	0.709007		ENSDARG00000007175.12	RecQ helicase-like	ZDB-GENE-050809-134	DKEY-245F7.3	ZDB-GENE-050809-134	protein_coding	ensembl_havana_gene	ENSDART00000101198.5	ENSDART00000021610^ENSDART00000101198^ENSDART00000162204^ENSDART00000172169
ENSDARG00000007179		NNN	0.282265	0.67901	0.441305	0.282265		ENSDARG00000007179.12	SAM and SH3 domain containing 1a	ZDB-GENE-030131-9960	sash1a	ZDB-GENE-030131-9960	protein_coding	ensembl_havana_gene	ENSDART00000046841.9	ENSDART00000046841^ENSDART00000087405^ENSDART00000137679^ENSDART00000153193^ENSDART00000153437
ENSDARG00000007180		NNN	0.488896	0.898102	0.655832	0.488896		ENSDARG00000007180.9	solute carrier family 30 (zinc transporter), member 4	ZDB-GENE-040426-1408	slc30a4	ZDB-GENE-040426-1408	protein_coding	ensembl_havana_gene	ENSDART00000007797.8	ENSDART00000007797^ENSDART00000182614
ENSDARG00000007181		NNN	0.948523	0.989627	0.985713	0.948523		ENSDARG00000007181.10	NAD kinase 2, mitochondrial	ZDB-GENE-040801-202	DKEY-163I6.2	ZDB-GENE-040801-202	protein_coding	ensembl_havana_gene	ENSDART00000140468.2	ENSDART00000140468^ENSDART00000140751^ENSDART00000157839
ENSDARG00000007184		NNN	0.991787	0.991787	0.999814	1		ENSDARG00000007184.11	zinc finger and BTB domain containing 16a	ZDB-GENE-030131-1989	zbtb16	ZDB-GENE-030131-1989	protein_coding	ensembl_havana_gene	ENSDART00000184419.1	ENSDART00000007806^ENSDART00000134103^ENSDART00000140284^ENSDART00000181815^ENSDART00000184419
ENSDARG00000007186		NNN	0.983458	0.983458	0.999996	0.999996		ENSDARG00000007186.7	protein phosphatase 1, regulatory subunit 8a	ZDB-GENE-060503-681	ppp1r8	ZDB-GENE-060503-681	protein_coding	ensembl_havana_gene	ENSDART00000003164.7	ENSDART00000003164
ENSDARG00000007195		NNN	0.999467	0.999467	1	1		ENSDARG00000007195.11	glutamate receptor, metabotropic 2b	ZDB-GENE-060201-5	grm7	—	protein_coding	ensembl_havana_gene	ENSDART00000163330.2	ENSDART00000012940^ENSDART00000163330^ENSDART00000189827
ENSDARG00000007196		NNN	0.503369	0.994465	0.503369	0.584069		ENSDARG00000007196.9	ribonucleic acid export 1	ZDB-GENE-040426-1029	—	—	protein_coding	ensembl	ENSDART00000020333.8	ENSDART00000020333
ENSDARG00000007198		NNN	0.951401	0.998617	0.993876	0.951401		ENSDARG00000007198.10	metastasis associated 1	ZDB-GENE-131121-353	DKEYP-84B10.1	—	protein_coding	ensembl_havana_gene	ENSDART00000187935.1	ENSDART00000045583^ENSDART00000156281^ENSDART00000157183^ENSDART00000187935
ENSDARG00000007199		NNN	0.114385	0.29849	0.114385	0.17573		ENSDARG00000007199.7	—	—	DKEYP-78E10.1	—	unprocessed_pseudogene	havana	ENSDART00000073484.4	ENSDART00000073484
ENSDARG00000007207		NNN	0.752875	0.918647	0.752875	0.93178		ENSDARG00000007207.10	canopy 2	ZDB-GENE-060315-4	—	—	protein_coding	ensembl	ENSDART00000188005.1	ENSDART00000056065^ENSDART00000188005
ENSDARG00000007216		NNN	0.304596	0.999856	0.304596	0.402231		ENSDARG00000007216.8	ATP-binding cassette, sub-family E (OABP), member 1	ZDB-GENE-040426-1995	abce1	ZDB-GENE-040426-1995	protein_coding	ensembl_havana_gene	ENSDART00000015777.8	ENSDART00000015777^ENSDART00000192175
ENSDARG00000007217		NNN	0.138805	0.998535	0.138805	0.351363		ENSDARG00000007217.8	WD repeat domain 55	ZDB-GENE-040924-7	flj20195l	ZDB-GENE-040924-7	protein_coding	ensembl_havana_gene	ENSDART00000003962.7	ENSDART00000003962^ENSDART00000161816
ENSDARG00000007219		SBB	0.999976	1	0.999976	0.999986		ENSDARG00000007219.11	actinin, alpha 1	ZDB-GENE-081113-4	DKEY-22K11.3	—	protein_coding	ensembl_havana_gene	ENSDART00000140243.3	ENSDART00000100217^ENSDART00000133740^ENSDART00000133858^ENSDART00000135741^ENSDART00000140243
ENSDARG00000007220		NNN	0.999661	1	0.999661	0.999977		ENSDARG00000007220.12	neural cell adhesion molecule 1b	ZDB-GENE-010822-2	ncam3	DKEY-85H21.1;ZDB-GENE-010822-2	protein_coding	ensembl_havana_gene	ENSDART00000142010.3	ENSDART00000019006^ENSDART00000136208^ENSDART00000142010^ENSDART00000146853
ENSDARG00000007221		NNN	0.192555	0.848864	0.330648	0.192555		ENSDARG00000007221.9	PDZ binding kinase	ZDB-GENE-030523-2	pbk	ZDB-GENE-030523-2	protein_coding	ensembl_havana_gene	ENSDART00000021788.9	ENSDART00000021788^ENSDART00000136476^ENSDART00000180784
ENSDARG00000007231		NNG	0.0743027	0.77326	0.427055	0.0743027		ENSDARG00000007231.11	receptor-like tyrosine kinase	ZDB-GENE-070209-277	ryk	ZDB-GENE-070209-277	protein_coding	ensembl_havana_gene	ENSDART00000079397.4	ENSDART00000079397^ENSDART00000128985^ENSDART00000132097
ENSDARG00000007241		NBB	0.910019	0.910019	0.99891	0.995659		ENSDARG00000007241.8	MYC proto-oncogene, bHLH transcription factor b	ZDB-GENE-040426-780	mycb	ZDB-GENE-040426-780	protein_coding	ensembl_havana_gene	ENSDART00000005143.6	ENSDART00000005143^ENSDART00000135040
ENSDARG00000007244		NNN	0.0568788	0.933071	0.161562	0.0568788		ENSDARG00000007244.8	acid phosphatase 2, lysosomal	ZDB-GENE-050306-40	acp2	ZDB-GENE-050306-40	protein_coding	ensembl_havana_gene	ENSDART00000173481.2	ENSDART00000173481
ENSDARG00000007245		NNN	0.97741	0.97741	0.9987	0.998974		ENSDARG00000007245.8	RUN domain containing 3Aa	ZDB-GENE-130530-533	DKEY-22A24.4	—	protein_coding	ensembl_havana_gene	ENSDART00000002393.7	ENSDART00000002393
ENSDARG00000007247		NNN	0.995392	0.995392	1	1		ENSDARG00000007247.12	RIC8 guanine nucleotide exchange factor A	ZDB-GENE-040927-18	ric8a	ZDB-GENE-040927-18	protein_coding	ensembl_havana_gene	ENSDART00000044738.7	ENSDART00000044738^ENSDART00000130354
ENSDARG00000007250		NNN	0.903907	0.944719	0.903907	0.999993		ENSDARG00000007250.8	unconventional SNARE in the ER 1 homolog (S. cerevisiae)	ZDB-GENE-040426-1015	DKEY-6N3.2	ZDB-GENE-040426-1015	protein_coding	ensembl_havana_gene	ENSDART00000006927.6	ENSDART00000006927^ENSDART00000126664
ENSDARG00000007257		NNG	0.179236	0.87004	0.179236	0.91926		ENSDARG00000007257.8	RAB5A, member RAS oncogene family, b	ZDB-GENE-040122-3	rab5ab	ZDB-GENE-040122-3	protein_coding	ensembl_havana_gene	ENSDART00000015694.7	ENSDART00000015694^ENSDART00000132547
ENSDARG00000007264		NNN	0.546376	0.999184	0.546376	0.871103		ENSDARG00000007264.11	nipsnap homolog 2	ZDB-GENE-991008-18	—	—	protein_coding	ensembl	ENSDART00000155682.2	ENSDART00000155682
ENSDARG00000007271		NNN	0.999993	0.999993	1	0.999999		ENSDARG00000007271.10	myoneurin	ZDB-GENE-030131-5378	mynn	ZDB-GENE-030131-5378	protein_coding	ensembl_havana_gene	ENSDART00000003884.9	ENSDART00000003884^ENSDART00000145637^ENSDART00000145752
ENSDARG00000007275		NNN	0.995808	0.995808	0.999983	1		ENSDARG00000007275.11	si:ch211-251b21.1	ZDB-GENE-060809-5	CH211-251B21.1	—	protein_coding	ensembl_havana_gene	ENSDART00000139096.2	ENSDART00000139096
ENSDARG00000007276		NNN	0.187786	0.53147	0.187786	0.999992		ENSDARG00000007276.10	elastase 3 like	ZDB-GENE-060710-2	CH211-214J8.14	ZDB-GENE-050522-172	protein_coding	ensembl_havana_gene	ENSDART00000009028.10	ENSDART00000009028
ENSDARG00000007277		NNN	0.919602	0.999262	0.919602	0.993472		ENSDARG00000007277.9	myogenic factor 5	ZDB-GENE-000616-6	myf5	ZDB-GENE-000616-6	protein_coding	ensembl_havana_gene	ENSDART00000127664.4	ENSDART00000112035^ENSDART00000127664
ENSDARG00000007278		NNN	0.614416	0.928142	0.998092	0.614416		ENSDARG00000007278.10	epithelial cell transforming 2	ZDB-GENE-040831-2	ect2	—	protein_coding	ensembl_havana_gene	ENSDART00000081827.4	ENSDART00000011087^ENSDART00000081827^ENSDART00000169509^ENSDART00000185574^ENSDART00000188276
ENSDARG00000007279		NGN	0.150479	0.268987	0.879477	0.150479		ENSDARG00000007279.7	Yip1 domain family, member 5	ZDB-GENE-040426-1057	DKEY-83D6.4	ZDB-GENE-040426-1057	protein_coding	ensembl_havana_gene	ENSDART00000008593.7	ENSDART00000008593
ENSDARG00000007285		NNN	0.885904	0.999968	0.885904	0.956657		ENSDARG00000007285.8	mitochondrial ribosomal protein L57	ZDB-GENE-040426-1745	mrp63	ZDB-GENE-040426-1745	protein_coding	ensembl_havana_gene	ENSDART00000016608.8	ENSDART00000016608^ENSDART00000133402^ENSDART00000146503
ENSDARG00000007289		NNN	0.902083	0.902083	0.953577	0.996138		ENSDARG00000007289.9	si:dkey-27j5.3	ZDB-GENE-121214-223	DKEY-27J5.3	—	protein_coding	ensembl_havana_gene	ENSDART00000181077.1	ENSDART00000152229^ENSDART00000181077
ENSDARG00000007294		NNN	0.95625	0.963445	0.978896	0.95625		ENSDARG00000007294.11	aconitase 2, mitochondrial	ZDB-GENE-030131-1390	aco2	ZDB-GENE-030131-1390	protein_coding	ensembl_havana_gene	ENSDART00000149180.3	ENSDART00000149180
ENSDARG00000007302		NNN	0.539337	0.895603	0.539337	0.684892		ENSDARG00000007302.7	SH3-domain GRB2-like 3b	ZDB-GENE-040121-4	sh3gl3	ZDB-GENE-040121-4	protein_coding	ensembl_havana_gene	ENSDART00000006512.7	ENSDART00000006512^ENSDART00000144023^ENSDART00000184279
ENSDARG00000007315		NNN	0.992039	0.999359	0.997444	0.992039		ENSDARG00000007315.11	thymopoietin a	ZDB-GENE-030131-6003	tmpo	ZDB-GENE-030131-6003	protein_coding	ensembl_havana_gene	ENSDART00000016690.8	ENSDART00000016690^ENSDART00000042874^ENSDART00000044005^ENSDART00000125762^ENSDART00000185974
ENSDARG00000007320		NNN	0.0447823	0.845367	0.0861985	0.0447823		ENSDARG00000007320.10	ribosomal protein L7	ZDB-GENE-030131-8654	rpl7	ZDB-GENE-030131-8654	protein_coding	ensembl_havana_gene	ENSDART00000019149.10	ENSDART00000019149^ENSDART00000132954
ENSDARG00000007323		SGG	0.0205004	1	0.0205004	0.360748		ENSDARG00000007323.8	charged multivesicular body protein 4Bb	ZDB-GENE-040426-2812	chmp4b	ZDB-GENE-040426-2812	protein_coding	ensembl_havana_gene	ENSDART00000015193.7	ENSDART00000015193^ENSDART00000149418
ENSDARG00000007329		NNN	0.315885	0.999983	0.36177	0.315885		ENSDARG00000007329.9	T-box 16	ZDB-GENE-990615-5	tbx16	ZDB-GENE-990615-5	protein_coding	ensembl_havana_gene	ENSDART00000007090.9	ENSDART00000007090
ENSDARG00000007344		NNN	0.445561	0.878715	0.445561	0.798334		ENSDARG00000007344.8	titin-cap (telethonin)	ZDB-GENE-070501-5	tcap	ZDB-GENE-070501-5	protein_coding	ensembl_havana_gene	ENSDART00000007293.8	ENSDART00000007293
ENSDARG00000007347		NBB	0.639161	0.639161	0.999993	0.999998		ENSDARG00000007347.8	delta(4)-desaturase, sphingolipid 1	ZDB-GENE-030131-5283	degs1	ZDB-GENE-030131-5283	protein_coding	ensembl_havana_gene	ENSDART00000013007.6	ENSDART00000013007^ENSDART00000137494
ENSDARG00000007349		NGG	0.289114	0.708755	0.289114	0.344661		ENSDARG00000007349.12	doublesex and mab-3 related transcription factor 1	ZDB-GENE-050511-1	dmrt1	ZDB-GENE-050511-1	protein_coding	ensembl_havana_gene	ENSDART00000124637.4	ENSDART00000044361^ENSDART00000124637^ENSDART00000126066^ENSDART00000128373^ENSDART00000128825^ENSDART00000130428^ENSDART00000130918^ENSDART00000141316^ENSDART00000177635
ENSDARG00000007356		NNN	0.326083	0.999338	0.326083	0.477971		ENSDARG00000007356.8	fibroblast growth factor 20a	ZDB-GENE-060110-1	fgf20a	ZDB-GENE-060110-1	protein_coding	ensembl_havana_gene	ENSDART00000013024.8	ENSDART00000013024
ENSDARG00000007358		SGN	0.0332177	0.999354	0.0468128	0.0332177		ENSDARG00000007358.10	chemokine (C-X-C motif) receptor 3, tandem duplicate 1	ZDB-GENE-060130-38	cxcr3.1	ZDB-GENE-060130-38	protein_coding	ensembl_havana_gene	ENSDART00000145754.2	ENSDART00000145754^ENSDART00000158347
ENSDARG00000007359		NNN	0.992851	0.992851	0.998833	0.999904		ENSDARG00000007359.6	zgc:56596	ZDB-GENE-040426-1089	DKEY-32E23.2	ZDB-GENE-040426-1089	protein_coding	ensembl_havana_gene	ENSDART00000013870.6	ENSDART00000013870
ENSDARG00000007362		SGG	0.873539	0.999703	0.8962	0.873539		ENSDARG00000007362.10	SFT2 domain containing 1	ZDB-GENE-040426-1350	sft2d1	ZDB-GENE-040426-1350	protein_coding	ensembl_havana_gene	ENSDART00000108935.3	ENSDART00000108935
ENSDARG00000007366		NNN	0.979304	0.979304	0.999051	0.999272		ENSDARG00000007366.9	si:ch73-71d17.1	ZDB-GENE-160728-110	CH73-71D17.1	—	protein_coding	ensembl_havana_gene	ENSDART00000021947.9	ENSDART00000021947^ENSDART00000173570^ENSDART00000173952
ENSDARG00000007369		NNG	0.747749	0.998001	0.747749	0.778667		ENSDARG00000007369.10	transcription factor 7 like 1b	ZDB-GENE-991110-10	tcf7l1b	—	protein_coding	ensembl_havana_gene	ENSDART00000185949.1	ENSDART00000051825^ENSDART00000142969^ENSDART00000148760^ENSDART00000157890^ENSDART00000185949
ENSDARG00000007370		NNN	0.805378	0.964975	0.805378	0.862667		ENSDARG00000007370.13	dysferlin, limb girdle muscular dystrophy 2B (autosomal recessive)	ZDB-GENE-070501-1	dysf	ZDB-GENE-070501-1	protein_coding	ensembl_havana_gene	ENSDART00000082620.7	ENSDART00000082620^ENSDART00000135415
ENSDARG00000007371		NNN	0.45637	0.843486	0.45637	0.855079		ENSDARG00000007371.8	solute carrier family 26 (anion exchanger), member 3	ZDB-GENE-041210-180	DKEY-31F5.2	—	protein_coding	ensembl_havana_gene	ENSDART00000040424.4	ENSDART00000040424^ENSDART00000146141
ENSDARG00000007377		NBN	0.0341355	0.999652	0.999296	0.0341355		ENSDARG00000007377.9	ornithine decarboxylase 1	ZDB-GENE-010816-1	odc1	ZDB-GENE-010816-1	protein_coding	ensembl_havana_gene	ENSDART00000149039.3	ENSDART00000148869^ENSDART00000149039^ENSDART00000149807^ENSDART00000184230^ENSDART00000190955
ENSDARG00000007382		NNN	0.732382	0.998077	0.732382	0.999807		ENSDARG00000007382.11	ubiquitin domain containing 1a	ZDB-GENE-070424-93	DKEY-15F17.5	ZDB-GENE-070424-93	protein_coding	ensembl_havana_gene	ENSDART00000026692.10	ENSDART00000026692^ENSDART00000084135
ENSDARG00000007383		NNB	0.149211	0.535441	0.149211	0.996783		ENSDARG00000007383.7	potassium channel, subfamily K, member 6	ZDB-GENE-050309-213	CH73-262H23.1	ZDB-GENE-050309-213	protein_coding	ensembl_havana_gene	ENSDART00000021192.7	ENSDART00000021192
ENSDARG00000007385		NNN	0.971135	0.999863	0.971135	0.988792		ENSDARG00000007385.10	chaperonin containing TCP1, subunit 7 (eta)	ZDB-GENE-020419-7	cct7	ZDB-GENE-020419-7	protein_coding	ensembl_havana_gene	ENSDART00000006802.7	ENSDART00000006802^ENSDART00000128363
ENSDARG00000007387		NNN	0.815082	0.987546	0.815082	0.904603		ENSDARG00000007387.10	interferon regulatory factor 2a	ZDB-GENE-030131-4135	irf2a	CH211-261D5.5;ZDB-GENE-030131-4135	protein_coding	ensembl_havana_gene	ENSDART00000131954.4	ENSDART00000130270^ENSDART00000131954^ENSDART00000149984
ENSDARG00000007396		NNN	0.188969	0.188969	0.637504	0.747837		ENSDARG00000007396.9	Rho family GTPase 3b	ZDB-GENE-040718-331	rnd3b	ZDB-GENE-040718-331	protein_coding	ensembl_havana_gene	ENSDART00000022392.8	ENSDART00000022392^ENSDART00000122036
ENSDARG00000007398		NGG	0.0536881	0.0536881	0.583545	0.511589		ENSDARG00000007398.10	leucine-rich repeat kinase 1	ZDB-GENE-101019-2	lrrk1	ZDB-GENE-101019-2	protein_coding	ensembl_havana_gene	ENSDART00000029668.9	ENSDART00000029668^ENSDART00000127974^ENSDART00000187902
ENSDARG00000007405		NNN	0.0238855	0.879231	0.0238855	0.249783		ENSDARG00000007405.8	serine/threonine kinase receptor associated protein	ZDB-GENE-040426-1110	strap	ZDB-GENE-040426-1110	protein_coding	ensembl_havana_gene	ENSDART00000124627.3	ENSDART00000124627
ENSDARG00000007406		NNN	0.971435	0.971435	0.998356	1		ENSDARG00000007406.10	paired-like homeobox 2a	ZDB-GENE-000223-14	phox2a	ZDB-GENE-000223-14	protein_coding	ensembl_havana_gene	ENSDART00000002384.10	ENSDART00000002384
ENSDARG00000007407		NNN	0.852455	0.999999	0.975328	0.852455		ENSDARG00000007407.9	BARX homeobox 1	ZDB-GENE-050522-28	barx1	ZDB-GENE-050522-28	protein_coding	ensembl_havana_gene	ENSDART00000023889.9	ENSDART00000023889
ENSDARG00000007409		NNN	0.423815	0.98955	0.423815	0.817656		ENSDARG00000007409.8	peptidylprolyl isomerase Fa	ZDB-GENE-040912-52	ppif	ZDB-GENE-040912-52	protein_coding	ensembl_havana_gene	ENSDART00000010052.7	ENSDART00000010052^ENSDART00000144417
ENSDARG00000007412		SGG	0.217641	0.993681	0.615015	0.217641		ENSDARG00000007412.11	solute carrier family 2 (facilitated glucose transporter), member 1b	ZDB-GENE-090915-1	slc2a1b	ZDB-GENE-090915-1	protein_coding	ensembl_havana_gene	ENSDART00000137458.3	ENSDART00000137458^ENSDART00000180614^ENSDART00000192049
ENSDARG00000007413		NNN	0.993985	0.993985	0.999992	0.999998		ENSDARG00000007413.10	AT rich interactive domain 2 (ARID, RFX-like)	ZDB-GENE-030131-6311	arid2	ZDB-GENE-030131-6311	protein_coding	ensembl_havana_gene	ENSDART00000019144.10	ENSDART00000019144^ENSDART00000113360
ENSDARG00000007418		SPP	0.996749	0.999999	0.999975	0.996749		ENSDARG00000007418.8	charged multivesicular body protein 4C	ZDB-GENE-050417-389	DKEY-189E1.1	ZDB-GENE-050417-389	protein_coding	ensembl_havana_gene	ENSDART00000003195.8	ENSDART00000003195
ENSDARG00000007421		NNN	0.886979	0.996589	0.902387	0.886979		ENSDARG00000007421.7	formimidoyltransferase cyclodeaminase	ZDB-GENE-030131-9643	DKEYP-84A8.4	ZDB-GENE-040426-1209	protein_coding	ensembl_havana_gene	ENSDART00000044683.5	ENSDART00000044683
ENSDARG00000007425		SGB	0.0318782	0.996194	0.0318782	0.998469		ENSDARG00000007425.9	apolipoprotein L, 1	ZDB-GENE-030131-3217	—	—	protein_coding	ensembl	ENSDART00000165085.2	ENSDART00000165085
ENSDARG00000007429		NNN	0.702375	0.998842	0.978239	0.702375		ENSDARG00000007429.9	NADPH dependent diflavin oxidoreductase 1	ZDB-GENE-040426-1555	—	—	protein_coding	ensembl	ENSDART00000191839.1	ENSDART00000165417^ENSDART00000191839
ENSDARG00000007430		NNN	0.971486	0.971486	0.999945	1		ENSDARG00000007430.8	PR domain containing 12b	ZDB-GENE-041114-172	—	—	protein_coding	ensembl	ENSDART00000022348.8	ENSDART00000022348
ENSDARG00000007436		NNG	0.0428314	0.805633	0.642037	0.0428314		ENSDARG00000007436.10	arginine vasopressin receptor 2a, duplicate a	ZDB-GENE-090313-344	DKEY-7I1.7	—	protein_coding	ensembl_havana_gene	ENSDART00000184969.1	ENSDART00000031379^ENSDART00000140216^ENSDART00000184969
ENSDARG00000007438		NNN	0.964496	0.985927	0.964496	0.984927		ENSDARG00000007438.8	ubiquitin-conjugating enzyme E2Ib	ZDB-GENE-990614-17	—	—	protein_coding	ensembl	ENSDART00000022999.8	ENSDART00000022999
ENSDARG00000007443		NNN	0.325919	0.325919	0.626795	0.945619		ENSDARG00000007443.9	F-box and leucine-rich repeat protein 18	ZDB-GENE-050913-65	fbxl18	ZDB-GENE-050913-65	protein_coding	ensembl_havana_gene	ENSDART00000103644.4	ENSDART00000103644
ENSDARG00000007444		NNN	0.949981	0.991613	0.997296	0.949981		ENSDARG00000007444.8	intraflagellar transport 81 homolog	ZDB-GENE-040714-3	ift81	ZDB-GENE-040714-3	protein_coding	ensembl_havana_gene	ENSDART00000004288.8	ENSDART00000004288^ENSDART00000139745
ENSDARG00000007449		NNN	1	1	1	1		ENSDARG00000007449.10	solute carrier family 25, member 39	ZDB-GENE-040426-1250	slc25a39	ZDB-GENE-040426-1250	protein_coding	ensembl_havana_gene	ENSDART00000014021.8	ENSDART00000014021^ENSDART00000142118^ENSDART00000151677
ENSDARG00000007461		NNG	0.0208521	0.700071	0.0208521	0.0431017		ENSDARG00000007461.12	SLIT-ROBO Rho GTPase activating protein 1a	ZDB-GENE-050420-284	CH211-227D19.1	—	protein_coding	ensembl_havana_gene	ENSDART00000088908.7	ENSDART00000088908^ENSDART00000140403
ENSDARG00000007465		NNN	0.556293	0.618591	0.838243	0.556293		ENSDARG00000007465.11	tudor domain containing 1	ZDB-GENE-070803-1	tdrd1	ZDB-GENE-070803-1	protein_coding	ensembl_havana_gene	ENSDART00000152981.3	ENSDART00000152878^ENSDART00000152981^ENSDART00000189988^ENSDART00000192628
ENSDARG00000007467		NNN	0.0438134	0.285176	0.10667	0.0438134		ENSDARG00000007467.10	interferon-induced protein with tetratricopeptide repeats 10	ZDB-GENE-121214-248	DKEY-26G8.11	—	protein_coding	havana	ENSDART00000152678.2	ENSDART00000152678
ENSDARG00000007477		NNN	0.0390326	0.243483	0.0390326	0.254917		ENSDARG00000007477.10	F-box protein 8	ZDB-GENE-060421-7091	fbxo8	ZDB-GENE-060421-7091	protein_coding	ensembl_havana_gene	ENSDART00000015323.8	ENSDART00000015323
ENSDARG00000007480		NNN	0.953298	0.980906	0.955775	0.953298		ENSDARG00000007480.10	retinal pigment epithelium-specific protein 65a	ZDB-GENE-040426-1717	—	—	protein_coding	ensembl	ENSDART00000004533.8	ENSDART00000004533
ENSDARG00000007485		NNN	0.777802	0.991385	0.777802	0.904275		ENSDARG00000007485.7	enhancer of polycomb homolog 2 (Drosophila)	ZDB-GENE-040426-802	epc2	—	protein_coding	ensembl_havana_gene	ENSDART00000021672.7	ENSDART00000021672^ENSDART00000143524
ENSDARG00000007490		NNN	0.63601	0.63601	0.715002	0.784627		ENSDARG00000007490.9	adrenoceptor beta 1	ZDB-GENE-081022-145	adrb1	ZDB-GENE-081022-145	protein_coding	ensembl_havana_gene	ENSDART00000020769.8	ENSDART00000020769
ENSDARG00000007494		NNB	0.118192	0.99999	0.118192	0.989911		ENSDARG00000007494.10	ST3 beta-galactoside alpha-2,3-sialyltransferase 8	ZDB-GENE-050417-286	st3gal2l	ZDB-GENE-050417-286	protein_coding	ensembl_havana_gene	ENSDART00000154349.3	ENSDART00000002846^ENSDART00000123094^ENSDART00000154349^ENSDART00000172004^ENSDART00000191733
ENSDARG00000007496		NNN	0.035515	0.851994	0.035515	0.455456		ENSDARG00000007496.9	UFM1-specific ligase 1	ZDB-GENE-040426-1163	ufl1	ZDB-GENE-040426-1163	protein_coding	ensembl_havana_gene	ENSDART00000009196.8	ENSDART00000009196^ENSDART00000149533
ENSDARG00000007523		NNN	0.854734	0.854734	0.992181	0.993651		ENSDARG00000007523.11	lysine (K)-specific methyltransferase 2E	ZDB-GENE-030131-4120	mll5	DKEY-105O6.4;ZDB-GENE-030131-4120	protein_coding	ensembl_havana_gene	ENSDART00000123369.3	ENSDART00000066903^ENSDART00000123369^ENSDART00000130072
ENSDARG00000007526		NNN	0.876299	0.993432	0.913432	0.876299		ENSDARG00000007526.12	NADH dehydrogenase (ubiquinone) Fe-S protein 2	ZDB-GENE-050522-273	ndufs2	ZDB-GENE-050522-273	protein_coding	ensembl_havana_gene	ENSDART00000108787.5	ENSDART00000108787
ENSDARG00000007531		NNN	0.532434	0.999785	0.606282	0.532434		ENSDARG00000007531.9	zinc finger, CCHC domain containing 9	ZDB-GENE-031030-9	—	—	protein_coding	ensembl	ENSDART00000015872.9	ENSDART00000015872
ENSDARG00000007534		NNN	0.788445	0.999262	0.981141	0.788445		ENSDARG00000007534.10	intelectin 1	ZDB-GENE-060929-564	—	—	protein_coding	ensembl	ENSDART00000189206.1	ENSDART00000121868^ENSDART00000181639^ENSDART00000188410^ENSDART00000189206
ENSDARG00000007553		NNN	0.776428	0.776428	0.978398	0.999999		ENSDARG00000007553.9	opsin 4.1	ZDB-GENE-030314-2	opn4	—	protein_coding	ensembl_havana_gene	ENSDART00000018501.9	ENSDART00000018501
ENSDARG00000007560		NNN	0.507015	0.687591	0.939738	0.507015		ENSDARG00000007560.12	sema domain, immunoglobulin domain (Ig), short basic domain, secreted, (semaphorin) 3bl	ZDB-GENE-030131-2956	CH211-106G4.1	—	protein_coding	ensembl_havana_gene	ENSDART00000046863.9	ENSDART00000046863^ENSDART00000140980
ENSDARG00000007561		NNN	0.879127	0.879127	0.942773	0.996708		ENSDARG00000007561.10	cadherin-related 23	ZDB-GENE-040513-7	—	—	protein_coding	ensembl	ENSDART00000016602.10	ENSDART00000016602
ENSDARG00000007566		NNN	0.484451	0.484451	0.524115	0.524792		ENSDARG00000007566.11	amyloid beta precursor protein (cytoplasmic tail) binding protein 2	ZDB-GENE-030131-1715	appbp2	ZDB-GENE-030131-1715	protein_coding	ensembl_havana_gene	ENSDART00000002824.10	ENSDART00000002824^ENSDART00000137569
ENSDARG00000007576		NNN	0.0830223	0.513962	0.0830223	0.425624		ENSDARG00000007576.11	crystallin, beta B1, like 1	ZDB-GENE-100112-3	crybb1l1	ZDB-GENE-100112-3	protein_coding	ensembl_havana_gene	ENSDART00000123832.4	ENSDART00000123832^ENSDART00000184930^ENSDART00000188713
ENSDARG00000007582		SNN	0.304918	1	0.304918	0.394112		ENSDARG00000007582.9	si:ch1073-155h21.1	ZDB-GENE-030131-2664	CH1073-155H21.1	ZDB-GENE-030131-2664	protein_coding	ensembl_havana_gene	ENSDART00000022725.9	ENSDART00000022725
ENSDARG00000007597		NNN	0.852637	0.852637	0.958354	0.971369		ENSDARG00000007597.8	biogenesis of lysosomal organelles complex-1, subunit 4, cappuccino	ZDB-GENE-040801-215	DKEY-202E17.6	ZDB-GENE-040801-215	protein_coding	ensembl_havana_gene	ENSDART00000136187.2	ENSDART00000136187
ENSDARG00000007601		NNN	0.892948	0.892948	0.999356	0.999999		ENSDARG00000007601.11	zinc finger, MYND-type containing 8	ZDB-GENE-041119-1	zmynd8	ZDB-GENE-041119-1	protein_coding	ensembl_havana_gene	ENSDART00000171183.2	ENSDART00000159380^ENSDART00000171183^ENSDART00000180565^ENSDART00000182081
ENSDARG00000007603		SGG	0.0322719	0.999991	0.0322719	0.310732		ENSDARG00000007603.10	syntaxin binding protein 2	ZDB-GENE-040426-2482	stxbp2	ZDB-GENE-040426-2482	protein_coding	ensembl_havana_gene	ENSDART00000031234.9	ENSDART00000031234
ENSDARG00000007614		NNN	0.236651	0.316695	0.236651	0.465817		ENSDARG00000007614.10	WW domain containing oxidoreductase	ZDB-GENE-040426-858	wwox	ZDB-GENE-040426-858	protein_coding	ensembl_havana_gene	ENSDART00000150178.2	ENSDART00000150173^ENSDART00000150178
ENSDARG00000007624		NGG	0.778312	0.985302	0.778312	0.862326		ENSDARG00000007624.9	GINS complex subunit 1 (Psf1 homolog)	ZDB-GENE-041010-184	—	—	protein_coding	ensembl	ENSDART00000022051.9	ENSDART00000022051
ENSDARG00000007630		NNN	0.985699	0.985699	0.99901	0.999977		ENSDARG00000007630.10	makorin, ring finger protein, 2	ZDB-GENE-020213-2	mkrn2	ZDB-GENE-020213-2	protein_coding	ensembl_havana_gene	ENSDART00000130504.4	ENSDART00000019997^ENSDART00000130504^ENSDART00000173120^ENSDART00000176364
ENSDARG00000007639		NNN	0.722025	0.887486	0.734684	0.722025		ENSDARG00000007639.7	CCR4-NOT transcription complex, subunit 4b	ZDB-GENE-040426-1164	CH211-9F20.2	ZDB-GENE-040426-1164	protein_coding	ensembl_havana_gene	ENSDART00000022646.7	ENSDART00000022646^ENSDART00000145032
ENSDARG00000007654		NNN	0.997538	0.997538	0.999998	1		ENSDARG00000007654.11	N-ethylmaleimide-sensitive factor a	ZDB-GENE-030616-37	nfsa	ZDB-GENE-030616-37	protein_coding	ensembl_havana_gene	ENSDART00000103043.6	ENSDART00000103043^ENSDART00000148647^ENSDART00000149968
ENSDARG00000007655		NNN	0.125809	0.976097	0.125809	0.870901		ENSDARG00000007655.10	crystallin, beta B1, like 3	ZDB-GENE-070820-11	crybb1l3	ZDB-GENE-070820-11	protein_coding	ensembl_havana_gene	ENSDART00000100293.6	ENSDART00000100293^ENSDART00000140092
ENSDARG00000007657		NNN	0.736802	0.980283	0.736802	0.743075		ENSDARG00000007657.8	cyclin H	ZDB-GENE-050320-13	DKEY-195M1.2	ZDB-GENE-050320-13	protein_coding	ensembl_havana_gene	ENSDART00000007057.5	ENSDART00000007057^ENSDART00000145665
ENSDARG00000007663		NNN	0.999019	0.999019	1	1		ENSDARG00000007663.9	amphiphysin	ZDB-GENE-040426-1711	amph	ZDB-GENE-040426-1711	protein_coding	ensembl_havana_gene	ENSDART00000027689.9	ENSDART00000027689^ENSDART00000158051^ENSDART00000169484^ENSDART00000192492
ENSDARG00000007671		NNN	0.226136	0.86501	0.595968	0.226136		ENSDARG00000007671.13	growth hormone receptor b	ZDB-GENE-071119-4	ghrb	ZDB-GENE-071119-4	protein_coding	ensembl_havana_gene	ENSDART00000135940.4	ENSDART00000135940^ENSDART00000163003
ENSDARG00000007678		NNN	1	1	1	1		ENSDARG00000007678.11	tweety family member 3b	ZDB-GENE-051120-105	DKEY-21J8.1	ZDB-GENE-051120-105	protein_coding	ensembl_havana_gene	ENSDART00000033361.8	ENSDART00000033361
ENSDARG00000007682		SPG	0.0293975	0.991518	0.999998	0.0293975		ENSDARG00000007682.8	pancreatic progenitor cell differentiation and proliferation factor a	ZDB-GENE-030219-204	c20orf149	—	protein_coding	ensembl_havana_gene	ENSDART00000032996.6	ENSDART00000032996^ENSDART00000137536^ENSDART00000139442
ENSDARG00000007691		NNN	0.0235667	0.270432	0.0235667	0.0755202		ENSDARG00000007691.11	cullin 1b	ZDB-GENE-040426-2887	cul1b	ZDB-GENE-040426-2887	protein_coding	ensembl_havana_gene	ENSDART00000134947.3	ENSDART00000024691^ENSDART00000122757^ENSDART00000134947^ENSDART00000141679
ENSDARG00000007693		SGG	0.646629	0.994419	0.646673	0.646629		ENSDARG00000007693.6	nuclear factor of kappa light polypeptide gene enhancer in B-cells inhibitor, alpha b	ZDB-GENE-030131-1819	nfkbiab	—	protein_coding	ensembl_havana_gene	ENSDART00000016597.6	ENSDART00000016597^ENSDART00000143133^ENSDART00000146744^ENSDART00000192514
ENSDARG00000007697		NNN	0.999959	0.999959	1	1		ENSDARG00000007697.9	fatty acid binding protein 7, brain, a	ZDB-GENE-000627-1	fabp7a	ZDB-GENE-000627-1	protein_coding	ensembl_havana_gene	ENSDART00000026180.9	ENSDART00000026180^ENSDART00000149568^ENSDART00000149978
ENSDARG00000007708		NNG	0.0386122	0.97668	0.0386122	0.906814		ENSDARG00000007708.9	NSA2 ribosome biogenesis homolog (S. cerevisiae)	ZDB-GENE-030131-488	CH73-178D14.2	—	protein_coding	ensembl_havana_gene	ENSDART00000021976.9	ENSDART00000021976
ENSDARG00000007709		NNB	0.0314329	0.19293	0.0314329	0.995641		ENSDARG00000007709.10	ADAM metallopeptidase with thrombospondin type 1 motif, 8a	ZDB-GENE-060526-202	DKEY-127J5.2	—	protein_coding	ensembl_havana_gene	ENSDART00000098300.4	ENSDART00000098300^ENSDART00000186584
ENSDARG00000007711		NGG	0.079912	0.079912	0.492363	0.661232		ENSDARG00000007711.10	RAB3A interacting protein (rabin3)-like 1	ZDB-GENE-110921-5	CH211-112D9.5	—	protein_coding	ensembl_havana_gene	ENSDART00000022506.10	ENSDART00000022506^ENSDART00000167130
ENSDARG00000007715		NNN	0.246032	0.246032	0.527903	0.807195		ENSDARG00000007715.10	lengsin, lens protein with glutamine synthetase domain	ZDB-GENE-060312-26	DKEY-78P20.1	ZDB-GENE-060312-26	protein_coding	ensembl_havana_gene	ENSDART00000020256.7	ENSDART00000020256
ENSDARG00000007720		NNN	0.607701	0.96875	0.825634	0.607701		ENSDARG00000007720.7	SUB1 homolog, transcriptional regulator b	ZDB-GENE-040718-209	sub1	ZDB-GENE-040718-209	protein_coding	ensembl_havana_gene	ENSDART00000011229.6	ENSDART00000011229^ENSDART00000175766
ENSDARG00000007722		NNN	0.0335091	0.892401	0.0335091	0.0369251		ENSDARG00000007722.10	nudix (nucleoside diphosphate linked moiety X)-type motif 8	ZDB-GENE-061013-219	—	—	protein_coding	ensembl	ENSDART00000155472.2	ENSDART00000155472
ENSDARG00000007723		NNN	0.729997	0.729997	0.998795	0.995142		ENSDARG00000007723.6	ephrin-B1	ZDB-GENE-010618-2	efnb1	ZDB-GENE-010618-2	protein_coding	ensembl_havana_gene	ENSDART00000011399.5	ENSDART00000011399
ENSDARG00000007727		NNG	0.0299475	0.636256	0.0299475	0.040135		ENSDARG00000007727.9	ral guanine nucleotide dissociation stimulator-like 2	ZDB-GENE-010131-1	rgl2	ZDB-GENE-010131-1	protein_coding	ensembl_havana_gene	ENSDART00000004052.8	ENSDART00000004052
ENSDARG00000007734		NNN	0.713766	0.752619	0.713766	0.719872		ENSDARG00000007734.7	STN1, CST complex subunit	ZDB-GENE-040426-1390	obfc1	ZDB-GENE-040426-1390	protein_coding	ensembl_havana_gene	ENSDART00000027624.7	ENSDART00000027624
ENSDARG00000007737		NGP	0.0927503	0.148238	0.0927503	1		ENSDARG00000007737.10	zyg-11 homolog (C. elegans)	ZDB-GENE-041014-17	zyg11	ZDB-GENE-041014-17	protein_coding	ensembl_havana_gene	ENSDART00000104112.6	ENSDART00000104112^ENSDART00000129633^ENSDART00000152708^ENSDART00000182115^ENSDART00000192109
ENSDARG00000007739		SGG	0.221063	0.998622	0.244585	0.221063		ENSDARG00000007739.11	ATPase Na+/K+ transporting subunit alpha 1a, tandem duplicate 2	ZDB-GENE-001212-2	atp1a1a.2	ZDB-GENE-001212-2	protein_coding	ensembl_havana_gene	ENSDART00000006449.8	ENSDART00000006449^ENSDART00000144313
ENSDARG00000007743		NNN	0.375778	0.375778	0.783981	0.984083		ENSDARG00000007743.10	interleukin 15, like	ZDB-GENE-041111-173	il15l	ZDB-GENE-041111-173	protein_coding	ensembl_havana_gene	ENSDART00000062666.7	ENSDART00000011030^ENSDART00000062666^ENSDART00000136029^ENSDART00000143092^ENSDART00000161047^ENSDART00000163532^ENSDART00000169537
ENSDARG00000007744		NNN	0.185697	0.999997	0.185697	0.791933		ENSDARG00000007744.13	TSR1, 20S rRNA accumulation, homolog (S. cerevisiae)	ZDB-GENE-030131-3762	tsr1	ZDB-GENE-030131-3762	protein_coding	ensembl_havana_gene	ENSDART00000149256.2	ENSDART00000052645^ENSDART00000135409^ENSDART00000149256^ENSDART00000162240
ENSDARG00000007745		NNN	0.407766	0.848914	0.407766	0.565875		ENSDARG00000007745.10	ubiquinol-cytochrome c reductase, Rieske iron-sulfur polypeptide 1	ZDB-GENE-040426-2060	uqcrfs1	ZDB-GENE-040426-2060	protein_coding	ensembl_havana_gene	ENSDART00000006868.10	ENSDART00000006868
ENSDARG00000007751		NNN	0.983134	0.983134	0.999942	0.99999		ENSDARG00000007751.9	lamin L3	ZDB-GENE-020424-4	lmnl3	ZDB-GENE-020424-4	protein_coding	ensembl_havana_gene	ENSDART00000023944.9	ENSDART00000023944^ENSDART00000183404
ENSDARG00000007753		NNN	0.999991	0.999991	1	1		ENSDARG00000007753.11	copine II	ZDB-GENE-030131-7896	cpne2	ZDB-GENE-030131-7896	protein_coding	ensembl_havana_gene	ENSDART00000021213.9	ENSDART00000021213^ENSDART00000143475^ENSDART00000186279
ENSDARG00000007755		NNN	0.566577	0.987376	0.566577	0.662596		ENSDARG00000007755.10	WD repeat domain 61	ZDB-GENE-040426-1851	wdr61	ZDB-GENE-040426-1851	protein_coding	ensembl_havana_gene	ENSDART00000130809.3	ENSDART00000130809^ENSDART00000153496
ENSDARG00000007760		NNN	0.146827	0.869728	0.146827	0.241329		ENSDARG00000007760.12	spastic paraplegia 21 (autosomal recessive, Mast syndrome)	ZDB-GENE-040426-2722	spg21	ZDB-GENE-040426-2722	protein_coding	ensembl_havana_gene	ENSDART00000130967.3	ENSDART00000130967^ENSDART00000148957
ENSDARG00000007764		NNN	0.974954	0.974954	0.999999	1		ENSDARG00000007764.9	kelch domain containing 10	ZDB-GENE-040426-776	DKEY-180P18.1	ZDB-GENE-040426-776	protein_coding	ensembl_havana_gene	ENSDART00000002401.7	ENSDART00000002401^ENSDART00000134701
ENSDARG00000007769		SNN	0.386911	0.994963	0.916746	0.386911		ENSDARG00000007769.11	sulfotransferase family 5A, member 1	ZDB-GENE-060929-978	DKEY-90B24.2	ZDB-GENE-060929-978	protein_coding	ensembl_havana_gene	ENSDART00000138714.3	ENSDART00000138714
ENSDARG00000007774		NNN	1	1	1	1		ENSDARG00000007774.7	vasohibin 2	ZDB-GENE-041014-355	vash2	ZDB-GENE-041014-355	protein_coding	ensembl_havana_gene	ENSDART00000153190.3	ENSDART00000036546^ENSDART00000153051^ENSDART00000153190^ENSDART00000153220
ENSDARG00000007783		NNN	0.97513	0.97513	0.981592	0.99945		ENSDARG00000007783.11	BLK proto-oncogene, Src family tyrosine kinase	ZDB-GENE-040724-106	bltk	ZDB-GENE-040724-106	protein_coding	ensembl_havana_gene	ENSDART00000163276.2	ENSDART00000020099^ENSDART00000138028^ENSDART00000163276
ENSDARG00000007786		NNN	0.181578	0.552859	0.749394	0.181578		ENSDARG00000007786.8	thioredoxin-related transmembrane protein 2b	ZDB-GENE-040625-105	txndc14	ZDB-GENE-040625-105	protein_coding	ensembl_havana_gene	ENSDART00000009858.6	ENSDART00000009858
ENSDARG00000007787		NNN	0.0283749	0.998702	0.736751	0.0283749		ENSDARG00000007787.11	zgc:112965	ZDB-GENE-050522-10	CH73-1F23.2	—	protein_coding	ensembl_havana_gene	ENSDART00000016351.10	ENSDART00000016351^ENSDART00000156144
ENSDARG00000007788		NNN	0.109998	0.109998	0.996704	0.999998		ENSDARG00000007788.13	ATPase plasma membrane Ca2+ transporting 1b	ZDB-GENE-080409-1	atp2b1b	ZDB-GENE-080409-1	protein_coding	ensembl_havana_gene	ENSDART00000104353.5	ENSDART00000104353^ENSDART00000148570^ENSDART00000149585^ENSDART00000149641^ENSDART00000149889
ENSDARG00000007791		NNN	0.290803	0.612777	0.290803	0.703258		ENSDARG00000007791.10	protein phosphatase 2, regulatory subunit A, beta a	ZDB-GENE-040426-2700	ppp2r1a	ZDB-GENE-040927-20	protein_coding	ensembl_havana_gene	ENSDART00000135344.2	ENSDART00000135344
ENSDARG00000007795		NGN	0.0240108	0.16084	0.314219	0.0240108		ENSDARG00000007795.10	cystatin C (amyloid angiopathy and cerebral hemorrhage)	ZDB-GENE-030131-373	DKEY-76K16.3	ZDB-GENE-060616-97	protein_coding	ensembl_havana_gene	ENSDART00000065435.6	ENSDART00000065435^ENSDART00000133857^ENSDART00000136820
ENSDARG00000007804		NBB	0.362908	0.362908	1	1		ENSDARG00000007804.8	growth arrest-specific 6	ZDB-GENE-030131-7773	CH211-129C2.3	ZDB-GENE-030131-7773	protein_coding	ensembl_havana_gene	ENSDART00000010092.7	ENSDART00000010092
ENSDARG00000007807		NNN	0.148075	0.851089	0.148075	0.969077		ENSDARG00000007807.9	cytohesin 3a	ZDB-GENE-120612-1	cyth3	ZDB-GENE-120612-1	protein_coding	ensembl_havana_gene	ENSDART00000020628.9	ENSDART00000020628
ENSDARG00000007808		SNN	0.0834448	0.980982	0.0834448	0.687522		ENSDARG00000007808.8	zinc finger, DHHC-type containing 16a	ZDB-GENE-040426-1621	zdhhc16	ZDB-GENE-040426-1621	protein_coding	ensembl_havana_gene	ENSDART00000134630.3	ENSDART00000134630
ENSDARG00000007812		NNN	0.969813	0.969813	0.99623	0.998465		ENSDARG00000007812.9	Sp3b transcription factor	ZDB-GENE-110815-3	DKEY-34M19.4	—	protein_coding	ensembl_havana_gene	ENSDART00000151484.3	ENSDART00000002247^ENSDART00000150942^ENSDART00000151484^ENSDART00000184567
ENSDARG00000007813		NNN	0.0237463	0.889295	0.804365	0.0237463		ENSDARG00000007813.10	arginyl aminopeptidase like 1	ZDB-GENE-030131-5522	—	—	protein_coding	ensembl	ENSDART00000024615.10	ENSDART00000024615
ENSDARG00000007818		NNN	0.999996	0.999996	1	1		ENSDARG00000007818.11	paralemmin 1b	ZDB-GENE-040426-1147	palm1b	ZDB-GENE-040426-1147	protein_coding	ensembl_havana_gene	ENSDART00000191006.1	ENSDART00000030520^ENSDART00000129895^ENSDART00000191006
ENSDARG00000007823		SGG	0.755196	0.987724	0.820595	0.755196		ENSDARG00000007823.10	activating transcription factor 3	ZDB-GENE-040426-728	atf3	ZDB-GENE-040426-728	protein_coding	ensembl_havana_gene	ENSDART00000022060.8	ENSDART00000022060
ENSDARG00000007824		NNN	0.975419	0.975419	1	1		ENSDARG00000007824.11	calmodulin binding transcription activator 1b	ZDB-GENE-080229-1	—	—	protein_coding	ensembl	ENSDART00000046663.8	ENSDART00000046663^ENSDART00000157659
ENSDARG00000007825		SBB	0.99969	1	0.999729	0.99969		ENSDARG00000007825.10	mitogen-activated protein kinase kinase 1	ZDB-GENE-040426-2759	map2k1	ZDB-GENE-040426-2759	protein_coding	ensembl_havana_gene	ENSDART00000025107.9	ENSDART00000025107
ENSDARG00000007836		NGG	0.142665	0.142665	0.568645	0.87138		ENSDARG00000007836.10	cathepsin La	ZDB-GENE-030131-106	ctsl1a	ZDB-GENE-030131-106	protein_coding	ensembl_havana_gene	ENSDART00000122288.4	ENSDART00000122288^ENSDART00000128813^ENSDART00000136965^ENSDART00000141198^ENSDART00000184237
ENSDARG00000007842		NNN	0.108409	0.108409	0.973723	0.962357		ENSDARG00000007842.10	si:dkey-165n16.5	ZDB-GENE-100922-121	DKEY-165N16.5	—	protein_coding	ensembl_havana_gene	ENSDART00000003997.7	ENSDART00000003997^ENSDART00000180723
ENSDARG00000007856		SNN	0.135367	0.989466	0.135367	0.73867		ENSDARG00000007856.6	reticulon 4 receptor-like 1a	ZDB-GENE-091118-38	CH211-151F2.1	—	protein_coding	ensembl_havana_gene	ENSDART00000184730.1	ENSDART00000015279^ENSDART00000184730
ENSDARG00000007863		NNN	0.888116	0.961395	0.888116	0.979752		ENSDARG00000007863.11	transformer 2 alpha homolog	ZDB-GENE-040426-1391	tra2a	ZDB-GENE-040426-1391	protein_coding	ensembl_havana_gene	ENSDART00000008595.11	ENSDART00000008595^ENSDART00000133873^ENSDART00000143221^ENSDART00000145115^ENSDART00000145225^ENSDART00000151175^ENSDART00000166807
ENSDARG00000007864		NNN	0.497949	1	0.990189	0.497949		ENSDARG00000007864.9	Pim proto-oncogene, serine/threonine kinase, related 195	ZDB-GENE-141216-224	CH211-42H24.7	—	protein_coding	havana	ENSDART00000170638.2	ENSDART00000170638
ENSDARG00000007867		SGG	0.714935	0.987585	0.714935	0.919225		ENSDARG00000007867.9	DAZ associated protein 2	ZDB-GENE-030131-3036	dazap2	ZDB-GENE-030131-3036	protein_coding	ensembl_havana_gene	ENSDART00000024695.9	ENSDART00000024695
ENSDARG00000007869		NNN	0.979173	0.979173	1	1		ENSDARG00000007869.8	EH-domain containing 3	ZDB-GENE-041014-352	ehd3	ZDB-GENE-041014-352	protein_coding	ensembl_havana_gene	ENSDART00000022694.7	ENSDART00000022694
ENSDARG00000007885		NNN	0.283242	0.998979	0.49423	0.283242		ENSDARG00000007885.9	Fanconi anemia, complementation group L	ZDB-GENE-040426-1045	fancl	—	protein_coding	ensembl_havana_gene	ENSDART00000020946.8	ENSDART00000020946^ENSDART00000131283^ENSDART00000142483
ENSDARG00000007886		NGG	0.491489	0.491489	0.901441	0.786776		ENSDARG00000007886.11	solute carrier family 35 (adenosine 3'-phospho 5'-phosphosulfate transporter), member B2	ZDB-GENE-050213-1	slc35b2	ZDB-GENE-050213-1	protein_coding	ensembl_havana_gene	ENSDART00000023064.9	ENSDART00000023064^ENSDART00000158350
ENSDARG00000007891		NNN	0.999818	1	0.999818	0.999989		ENSDARG00000007891.9	mesenchyme homeobox 1	ZDB-GENE-040718-149	DKEY-102M20.1	ZDB-GENE-040718-149	protein_coding	ensembl_havana_gene	ENSDART00000105661.6	ENSDART00000105661
ENSDARG00000007892		NNN	0.910486	0.999205	0.910486	0.973476		ENSDARG00000007892.7	programmed cell death 2	ZDB-GENE-040426-1236	pdcd2	ZDB-GENE-040426-1236	protein_coding	ensembl_havana_gene	ENSDART00000022682.7	ENSDART00000022682
ENSDARG00000007901		NNN	0.990511	0.998452	0.990511	0.99496		ENSDARG00000007901.9	crooked neck pre-mRNA splicing factor 1	ZDB-GENE-040426-694	—	—	protein_coding	ensembl	ENSDART00000112689.4	ENSDART00000112689
ENSDARG00000007906		NNN	0.963789	0.963836	0.963789	0.999963		ENSDARG00000007906.10	low density lipoprotein receptor-related protein 2b	ZDB-GENE-111115-1	lrp2b	ZDB-GENE-111115-1	protein_coding	ensembl_havana_gene	ENSDART00000152550.3	ENSDART00000079326^ENSDART00000152550^ENSDART00000170024
ENSDARG00000007912		NBB	0.0775191	0.0775191	0.999881	0.99967		ENSDARG00000007912.11	si:ch211-196i2.1	ZDB-GENE-091204-150	CH211-196I2.1	—	protein_coding	havana	ENSDART00000155097.3	ENSDART00000155097
ENSDARG00000007916		NNN	0.920164	0.999787	0.920164	0.994739		ENSDARG00000007916.8	X-prolyl aminopeptidase 3, mitochondrial	ZDB-GENE-040426-2076	CH211-256M1.3	ZDB-GENE-040426-2076	protein_coding	ensembl_havana_gene	ENSDART00000050245.6	ENSDART00000050245^ENSDART00000135047
ENSDARG00000007918		NNN	0.897617	0.999995	0.897617	0.969666		ENSDARG00000007918.12	tetratricopeptide repeat domain 27	ZDB-GENE-030102-1	ttc27	ZDB-GENE-030102-1	protein_coding	ensembl_havana_gene	ENSDART00000151999.2	ENSDART00000136384^ENSDART00000151999^ENSDART00000190442
ENSDARG00000007923		NBB	0.297841	0.297841	0.999558	0.999739		ENSDARG00000007923.11	protein tyrosine phosphatase, non-receptor type 1	ZDB-GENE-980605-23	—	—	protein_coding	ensembl	ENSDART00000062693.6	ENSDART00000062693
ENSDARG00000007941		NNN	0.264572	0.264572	1	1		ENSDARG00000007941.7	H6 family homeobox 4	ZDB-GENE-060825-142	hmx4	ZDB-GENE-060825-142	protein_coding	ensembl_havana_gene	ENSDART00000027463.7	ENSDART00000027463
ENSDARG00000007943		NNN	0.937381	0.996675	0.937381	0.999115		ENSDARG00000007943.8	GA binding protein transcription factor, beta subunit 2a	ZDB-GENE-030131-5733	gabpb2a	ZDB-GENE-030131-5733	protein_coding	ensembl_havana_gene	ENSDART00000003544.7	ENSDART00000003544^ENSDART00000168194
ENSDARG00000007944		NNN	0.999997	0.999997	0.999997	1		ENSDARG00000007944.9	LIM homeobox 1b	ZDB-GENE-980526-116	lhx1b	ZDB-GENE-980526-116	protein_coding	ensembl_havana_gene	ENSDART00000021159.9	ENSDART00000021159
ENSDARG00000007950		NNN	0.888384	0.988859	0.963522	0.888384		ENSDARG00000007950.11	integrin, alpha 11b	ZDB-GENE-071009-4	itga11b	ZDB-GENE-071009-4	protein_coding	ensembl_havana_gene	ENSDART00000153537.3	ENSDART00000153537^ENSDART00000154865^ENSDART00000185527
ENSDARG00000007955		NNN	0.520314	0.999985	0.520314	0.641078		ENSDARG00000007955.10	isoleucyl-tRNA synthetase	ZDB-GENE-030131-6325	—	—	protein_coding	ensembl	ENSDART00000004423.10	ENSDART00000004423
ENSDARG00000007959		NNN	0.090379	0.971828	0.090379	0.12338		ENSDARG00000007959.9	3-hydroxyisobutyrate dehydrogenase b	ZDB-GENE-040426-1582	hibadh	ZDB-GENE-040426-1582	protein_coding	ensembl_havana_gene	ENSDART00000006429.8	ENSDART00000006429^ENSDART00000131452^ENSDART00000132407^ENSDART00000137902
ENSDARG00000007960		NNN	0.97471	0.97471	0.985528	0.997439		ENSDARG00000007960.10	heterogeneous nuclear ribonucleoprotein A/Ba	ZDB-GENE-030131-185	hnrnpab	ZDB-GENE-030131-185	protein_coding	ensembl_havana_gene	ENSDART00000148447.3	ENSDART00000148394^ENSDART00000148447^ENSDART00000148497^ENSDART00000149114^ENSDART00000149492^ENSDART00000150050
ENSDARG00000007971		NNN	0.060185	0.97741	0.510806	0.060185		ENSDARG00000007971.6	CDC28 protein kinase regulatory subunit 1B	ZDB-GENE-040801-112	DKEY-204A24.4	ZDB-GENE-040801-112	protein_coding	ensembl_havana_gene	ENSDART00000026276.6	ENSDART00000026276
ENSDARG00000007975		NNN	0.991458	0.991458	0.999789	0.999933		ENSDARG00000007975.7	ferritin, heavy polypeptide 1b	ZDB-GENE-040912-30	fth1b	ZDB-GENE-040912-30	protein_coding	ensembl_havana_gene	ENSDART00000029580.6	ENSDART00000029580
ENSDARG00000007976		NNN	0.667995	0.761603	0.667995	0.793878		ENSDARG00000007976.11	si:ch211-220f16.2	ZDB-GENE-070912-199	CH211-220F16.2	—	protein_coding	ensembl_havana_gene	ENSDART00000144562.4	ENSDART00000131207^ENSDART00000135357^ENSDART00000144562^ENSDART00000162086
ENSDARG00000007982		NNN	0.999999	0.999999	1	1		ENSDARG00000007982.7	one cut homeobox 1	ZDB-GENE-040426-1469	onecut1l	ZDB-GENE-040426-1469	protein_coding	ensembl_havana_gene	ENSDART00000010177.6	ENSDART00000010177^ENSDART00000193136
ENSDARG00000007988		NNN	0.258882	0.258882	0.834897	0.968855		ENSDARG00000007988.11	mannan-binding lectin serine peptidase 2	ZDB-GENE-060130-154	masp2	CH211-237P19.1;ZDB-GENE-060130-154	protein_coding	ensembl_havana_gene	ENSDART00000132179.3	ENSDART00000132179^ENSDART00000142273^ENSDART00000147626
ENSDARG00000007989		NNN	0.0574367	0.898914	0.0681427	0.0574367		ENSDARG00000007989.7	neural precursor cell expressed, developmentally down-regulated 8	ZDB-GENE-030616-588	nedd8	ZDB-GENE-030616-588	protein_coding	ensembl_havana_gene	ENSDART00000018580.7	ENSDART00000018580
ENSDARG00000007990		NNN	0.649571	0.93752	0.649571	0.891492		ENSDARG00000007990.11	wilms tumor 1b	ZDB-GENE-050420-319	CH211-160J6.3	—	protein_coding	ensembl_havana_gene	ENSDART00000146543.2	ENSDART00000146543
ENSDARG00000007996		NNN	0.735308	0.735308	0.999989	1		ENSDARG00000007996.11	POU class 2 homeobox 1b	ZDB-GENE-030131-2422	CH211-218D20.11	ZDB-GENE-030131-2422	protein_coding	ensembl_havana_gene	ENSDART00000146480.3	ENSDART00000035522^ENSDART00000144272^ENSDART00000146480^ENSDART00000147913^ENSDART00000183451
ENSDARG00000008010		NNN	0.564738	0.822117	0.671989	0.564738		ENSDARG00000008010.6	zgc:194189	ZDB-GENE-081022-71	—	—	protein_coding	ensembl	ENSDART00000020616.6	ENSDART00000020616
ENSDARG00000008014		NNN	0.0512204	0.438034	0.0512204	0.116531		ENSDARG00000008014.9	nudix (nucleoside diphosphate linked moiety X)-type motif 17	ZDB-GENE-050913-50	DKEY-7J14.4	ZDB-GENE-050913-50	protein_coding	ensembl_havana_gene	ENSDART00000017966.8	ENSDART00000017966^ENSDART00000131898^ENSDART00000134143^ENSDART00000142003
ENSDARG00000008019		NNN	0.428017	0.9796	0.928014	0.428017		ENSDARG00000008019.9	myxovirus (influenza virus) resistance G	ZDB-GENE-030721-10	mxg	ZDB-GENE-030721-10	protein_coding	ensembl_havana_gene	ENSDART00000104340.6	ENSDART00000104340^ENSDART00000156435
ENSDARG00000008020		NNN	0.977279	0.989623	0.977279	0.979717		ENSDARG00000008020.9	mediator complex subunit 31	ZDB-GENE-040718-114	med31	ZDB-GENE-040718-114	protein_coding	ensembl_havana_gene	ENSDART00000124416.3	ENSDART00000124416
ENSDARG00000008022		NNN	0.838587	0.997327	0.998138	0.838587		ENSDARG00000008022.10	kinesin family member 18A	ZDB-GENE-040426-862	kif18a	ZDB-GENE-040426-862	protein_coding	ensembl_havana_gene	ENSDART00000023568.10	ENSDART00000023568^ENSDART00000134521^ENSDART00000185433
ENSDARG00000008026		SBB	0.991948	1	0.991948	0.994402		ENSDARG00000008026.12	family with sequence similarity 129, member Bb	ZDB-GENE-030131-6218	—	—	protein_coding	ensembl	ENSDART00000184936.1	ENSDART00000016628^ENSDART00000184936^ENSDART00000191119
ENSDARG00000008029		NNG	0.0700465	0.542258	0.0700465	0.484564		ENSDARG00000008029.10	meprin A, alpha (PABA peptide hydrolase), tandem duplicate 2	ZDB-GENE-041001-208	mep1a.2	ZDB-GENE-041001-208	protein_coding	ensembl_havana_gene	ENSDART00000026234.7	ENSDART00000026234^ENSDART00000141675
ENSDARG00000008030		NBN	0.029668	0.029668	0.984675	0.0741309		ENSDARG00000008030.11	myosin, light chain 9b, regulatory	ZDB-GENE-040426-2296	—	—	protein_coding	ensembl	ENSDART00000113505.5	ENSDART00000113505
ENSDARG00000008032		NNN	0.969289	0.993747	0.969289	0.999618		ENSDARG00000008032.11	squamous cell carcinoma antigen recognized by T cells 3	ZDB-GENE-040724-10	CH211-191D15.4	—	protein_coding	ensembl_havana_gene	ENSDART00000008402.9	ENSDART00000008402^ENSDART00000124545
ENSDARG00000008034		NNN	0.449619	0.867826	0.449619	0.974045		ENSDARG00000008034.11	v-ski avian sarcoma viral oncogene homolog b	ZDB-GENE-990715-10	skib	—	protein_coding	ensembl_havana_gene	ENSDART00000103549.5	ENSDART00000103549^ENSDART00000159214
ENSDARG00000008049		NNN	0.781933	0.781933	0.914375	0.790943		ENSDARG00000008049.8	si:dkey-42i9.4	ZDB-GENE-030131-8398	DKEY-42I9.4	ZDB-GENE-030131-8398	protein_coding	ensembl_havana_gene	ENSDART00000013933.8	ENSDART00000013933^ENSDART00000179708
ENSDARG00000008060		NNN	0.82982	0.962271	0.82982	0.934796		ENSDARG00000008060.10	scavenger receptor class A, member 3	ZDB-GENE-041014-317	scara3	ZDB-GENE-041014-317	protein_coding	ensembl_havana_gene	ENSDART00000002481.8	ENSDART00000002481^ENSDART00000146683
ENSDARG00000008068		NNN	0.440455	0.999479	0.440455	0.704971		ENSDARG00000008068.8	translation machinery associated 16 homolog	ZDB-GENE-050522-20	CH211-42I9.3	ZDB-GENE-050522-20	protein_coding	ensembl_havana_gene	ENSDART00000005733.8	ENSDART00000005733^ENSDART00000137496
ENSDARG00000008075		NNN	0.542027	0.542027	0.999473	0.982482		ENSDARG00000008075.8	immune-related, lectin-like receptor 4	ZDB-GENE-050311-5	illr4	CH211-173P18.4;ZDB-GENE-050311-5	protein_coding	ensembl_havana_gene	ENSDART00000102904.5	ENSDART00000102904
ENSDARG00000008095		NNN	0.103516	0.553899	0.180205	0.103516		ENSDARG00000008095.12	olfactory receptor C family, d1	ZDB-GENE-100721-9	CH211-229C8.2	—	protein_coding	ensembl_havana_gene	ENSDART00000028134.11	ENSDART00000028134
ENSDARG00000008097		NNN	0.991056	0.991056	1	1		ENSDARG00000008097.10	serine/arginine-rich splicing factor 9	ZDB-GENE-040426-2397	CH73-46J18.3	ZDB-GENE-040426-2397	protein_coding	ensembl_havana_gene	ENSDART00000002985.7	ENSDART00000002985^ENSDART00000125188^ENSDART00000135144
ENSDARG00000008098		SGN	0.124529	0.998705	0.497957	0.124529		ENSDARG00000008098.9	interferon-induced protein with tetratricopeptide repeats 9	ZDB-GENE-121214-233	DKEY-26G8.12	—	protein_coding	havana	ENSDART00000152814.2	ENSDART00000152814
ENSDARG00000008100		SGG	0.151059	0.999953	0.652826	0.151059		ENSDARG00000008100.11	solute carrier family 7 (neutral amino acid transporter light chain, asc system), member 10a	ZDB-GENE-080116-1	slc7a10	ZDB-GENE-080116-1	protein_coding	ensembl_havana_gene	ENSDART00000075782.7	ENSDART00000075782
ENSDARG00000008105		NNN	0.531037	0.999709	0.531037	0.908208		ENSDARG00000008105.7	methyltransferase like 2A	ZDB-GENE-050417-462	DKEY-229K5.1	ZDB-GENE-050417-462	protein_coding	ensembl_havana_gene	ENSDART00000007857.7	ENSDART00000007857^ENSDART00000123938^ENSDART00000193509
ENSDARG00000008107		SBB	0.996618	0.999077	0.99929	0.996618		ENSDARG00000008107.12	v-src avian sarcoma (Schmidt-Ruppin A-2) viral oncogene homolog	ZDB-GENE-030131-3809	src	ZDB-GENE-030131-3809	protein_coding	ensembl_havana_gene	ENSDART00000102843.5	ENSDART00000102843^ENSDART00000149819^ENSDART00000184254^ENSDART00000190985
ENSDARG00000008119		NNN	0.994247	0.994247	0.999177	0.999703		ENSDARG00000008119.12	si:ch211-195d17.2	ZDB-GENE-030131-513	CH211-195D17.2	ZDB-GENE-030131-513	protein_coding	ensembl_havana_gene	ENSDART00000130599.3	ENSDART00000015928^ENSDART00000130599^ENSDART00000131219
ENSDARG00000008127		NNN	0.999811	0.999842	0.999811	1		ENSDARG00000008127.12	protocadherin-related 15b	ZDB-GENE-050214-1	pcdh15b	ZDB-GENE-050214-1	protein_coding	ensembl_havana_gene	ENSDART00000171846.2	ENSDART00000106391^ENSDART00000152322^ENSDART00000171846
ENSDARG00000008131		NNN	0.938366	0.938366	1	1		ENSDARG00000008131.8	SRY (sex determining region Y)-box 1b	ZDB-GENE-060322-5	sox1b	ZDB-GENE-060322-5	protein_coding	ensembl_havana_gene	ENSDART00000010894.8	ENSDART00000010894
ENSDARG00000008133		NNN	0.99874	0.99874	0.99998	0.999993		ENSDARG00000008133.9	forkhead box L1	ZDB-GENE-040426-1181	DKEY-102F14.6	ZDB-GENE-040426-1181	protein_coding	ensembl_havana_gene	ENSDART00000018764.9	ENSDART00000018764
ENSDARG00000008140		NNN	0.696529	0.696529	0.971395	0.979215		ENSDARG00000008140.12	potassium voltage-gated channel, shaker-related subfamily, beta member 1 a	ZDB-GENE-050327-79	kcnab1	ZDB-GENE-050327-79	protein_coding	ensembl_havana_gene	ENSDART00000131478.3	ENSDART00000059394^ENSDART00000131478
ENSDARG00000008141		NNN	0.547619	0.999882	0.550112	0.547619		ENSDARG00000008141.9	retinoblastoma-like 1 (p107)	ZDB-GENE-030131-8179	rbl1	ZDB-GENE-030131-8179	protein_coding	ensembl_havana_gene	ENSDART00000073865.5	ENSDART00000073865^ENSDART00000149033
ENSDARG00000008142		NNG	0.0384929	0.966204	0.0384929	0.884741		ENSDARG00000008142.9	syntaxin binding protein 3	ZDB-GENE-040426-2833	stxbp3	ZDB-GENE-040426-2833	protein_coding	ensembl_havana_gene	ENSDART00000044776.6	ENSDART00000044776
ENSDARG00000008153		NNN	0.923747	0.923747	0.993829	0.999985		ENSDARG00000008153.11	serine incorporator 5	ZDB-GENE-040426-2918	CH211-198E13.5	ZDB-GENE-040426-2918	protein_coding	ensembl_havana_gene	ENSDART00000097194.5	ENSDART00000097194
ENSDARG00000008155		NNN	0.987859	0.987859	1	1		ENSDARG00000008155.9	spermine synthase	ZDB-GENE-040625-150	sms	ZDB-GENE-040625-150	protein_coding	ensembl_havana_gene	ENSDART00000114081.5	ENSDART00000114081
ENSDARG00000008164		NNN	0.655449	0.96548	0.655449	0.885514		ENSDARG00000008164.8	bloodthirsty-related gene family, member 33	ZDB-GENE-090512-4	—	—	protein_coding	ensembl	ENSDART00000066816.4	ENSDART00000066816
ENSDARG00000008165		SGG	0.532454	0.999998	0.532454	0.670046		ENSDARG00000008165.11	caspase a	ZDB-GENE-000616-3	caspa	ZDB-GENE-000616-3	protein_coding	ensembl_havana_gene	ENSDART00000034544.9	ENSDART00000034544
ENSDARG00000008170		SPP	1	1	1	1		ENSDARG00000008170.10	drebrin-like a	ZDB-GENE-040704-42	CH73-159H15.2	ZDB-GENE-040704-42	protein_coding	ensembl_havana_gene	ENSDART00000025691.9	ENSDART00000025691^ENSDART00000134632^ENSDART00000140382
ENSDARG00000008174		NNN	0.828365	0.966298	0.89406	0.828365		ENSDARG00000008174.7	homeobox B1a	ZDB-GENE-990415-101	hoxb1a	—	protein_coding	ensembl_havana_gene	ENSDART00000110682.4	ENSDART00000110682
ENSDARG00000008182		NNG	0.0308349	0.544517	0.0308349	0.0834003		ENSDARG00000008182.9	si:ch73-111e15.1	ZDB-GENE-110411-28	CH73-111E15.1	—	protein_coding	ensembl_havana_gene	ENSDART00000149470.2	ENSDART00000149470
ENSDARG00000008184		NNN	0.022858	0.560181	0.022858	0.0320409		ENSDARG00000008184.11	melanoma inhibitory activity family, member 3	ZDB-GENE-041014-270	mia3	ZDB-GENE-041014-270	protein_coding	ensembl_havana_gene	ENSDART00000060505.6	ENSDART00000041476^ENSDART00000060505^ENSDART00000165076
ENSDARG00000008186		NNN	0.999997	0.999997	1	1		ENSDARG00000008186.12	spleen tyrosine kinase	ZDB-GENE-040702-3	syk	ZDB-GENE-040702-3	protein_coding	ensembl_havana_gene	ENSDART00000005292.8	ENSDART00000005292^ENSDART00000141943^ENSDART00000164558
ENSDARG00000008188		NNN	0.932927	0.932927	0.942191	0.994861		ENSDARG00000008188.12	splicing factor 1	ZDB-GENE-030131-2492	sf1	ZDB-GENE-030131-2492	protein_coding	ensembl_havana_gene	ENSDART00000166900.3	ENSDART00000020212^ENSDART00000126037^ENSDART00000139321^ENSDART00000143455^ENSDART00000166900
ENSDARG00000008191		NNN	0.0428675	0.0428675	0.531361	0.927666		ENSDARG00000008191.11	transmembrane protein with EGF-like and two follistatin-like domains 1a	ZDB-GENE-070912-294	CH211-39L18.5	—	protein_coding	havana	ENSDART00000056441.6	ENSDART00000056441^ENSDART00000131554
ENSDARG00000008192		NNN	0.519424	0.519424	0.990264	0.975718		ENSDARG00000008192.10	pantothenate kinase 1a	ZDB-GENE-040426-2846	pank1a	ZDB-GENE-040426-2846	protein_coding	ensembl_havana_gene	ENSDART00000146787.3	ENSDART00000135814^ENSDART00000143508^ENSDART00000146787
ENSDARG00000008200		SPP	0.999841	0.999841	1	0.999984		ENSDARG00000008200.13	UDP-glucose pyrophosphorylase 2b	ZDB-GENE-030131-6352	ugp2b	ZDB-GENE-030131-6352	protein_coding	ensembl_havana_gene	ENSDART00000140467.3	ENSDART00000131417^ENSDART00000139963^ENSDART00000140467^ENSDART00000142283^ENSDART00000163221
ENSDARG00000008203		NNN	0.0615845	0.999997	0.418185	0.0615845		ENSDARG00000008203.10	paired box 1a	ZDB-GENE-070112-182	—	—	protein_coding	ensembl	ENSDART00000020156.8	ENSDART00000020156^ENSDART00000134377
ENSDARG00000008209		NNN	0.993485	0.993485	1	1		ENSDARG00000008209.13	myelin transcription factor 1-like, a	ZDB-GENE-041001-172	myt1la	ZDB-GENE-041001-172	protein_coding	ensembl_havana_gene	ENSDART00000153150.3	ENSDART00000153150^ENSDART00000184871
ENSDARG00000008212		NNN	0.977571	0.977571	0.999313	0.999993		ENSDARG00000008212.7	potassium channel, subfamily K, member 13a	ZDB-GENE-080219-46	kcnk13a	ZDB-GENE-080219-46	protein_coding	ensembl_havana_gene	ENSDART00000017930.6	ENSDART00000017930
ENSDARG00000008218		NNN	0.993291	0.993291	0.997553	0.999568		ENSDARG00000008218.11	zinc finger protein 410	ZDB-GENE-040426-1817	znf410	ZDB-GENE-040426-1817	protein_coding	ensembl_havana_gene	ENSDART00000147542.3	ENSDART00000132168^ENSDART00000143332^ENSDART00000143591^ENSDART00000144154^ENSDART00000145735^ENSDART00000147542^ENSDART00000153192
ENSDARG00000008219		NGN	0.155183	0.155183	0.194583	0.413098		ENSDARG00000008219.6	crystallin, gamma M4	ZDB-GENE-120312-2	—	—	protein_coding	ensembl	ENSDART00000122957.2	ENSDART00000122957
ENSDARG00000008224		NNN	0.610391	0.759084	0.610391	0.939225		ENSDARG00000008224.11	vacuolar protein sorting 35 homolog (S. cerevisiae)	ZDB-GENE-030131-2042	vps35	ZDB-GENE-030131-2042	protein_coding	ensembl_havana_gene	ENSDART00000016105.11	ENSDART00000016105^ENSDART00000138800^ENSDART00000174058^ENSDART00000174168^ENSDART00000174269
ENSDARG00000008235		NNN	0.020269	0.341568	0.020269	0.52052		ENSDARG00000008235.11	component of oligomeric golgi complex 5	ZDB-GENE-041210-47	cog5	ZDB-GENE-041210-47	protein_coding	ensembl_havana_gene	ENSDART00000150344.2	ENSDART00000021953^ENSDART00000150344^ENSDART00000192550
ENSDARG00000008237		NNN	0.727948	0.988903	0.727948	0.901718		ENSDARG00000008237.11	seryl-tRNA synthetase	ZDB-GENE-040831-1	sars	ZDB-GENE-040831-1	protein_coding	ensembl_havana_gene	ENSDART00000003296.8	ENSDART00000003296^ENSDART00000147862
ENSDARG00000008238		NNG	0.185133	0.320627	0.185133	0.659969		ENSDARG00000008238.10	mannosidase, beta A, lysosomal	ZDB-GENE-040426-721	—	—	protein_coding	ensembl	ENSDART00000190641.1	ENSDART00000079310^ENSDART00000190641
ENSDARG00000008239		NGG	0.681147	0.848671	0.684905	0.681147		ENSDARG00000008239.11	molybdenum cofactor synthesis 3	ZDB-GENE-040426-782	mocs3	ZDB-GENE-040426-782	protein_coding	ensembl_havana_gene	ENSDART00000009528.9	ENSDART00000009528^ENSDART00000144258
ENSDARG00000008243		NNN	0.905201	0.999223	0.954643	0.905201		ENSDARG00000008243.7	chaperonin containing TCP1, subunit 8 (theta)	ZDB-GENE-040426-876	—	—	protein_coding	ensembl	ENSDART00000166348.2	ENSDART00000009477^ENSDART00000166348
ENSDARG00000008247		NNN	0.979066	0.979066	0.994574	0.999456		ENSDARG00000008247.12	vascular endothelial zinc finger 1a	ZDB-GENE-040108-4	DKEY-263L2.1	—	protein_coding	ensembl_havana_gene	ENSDART00000029843.10	ENSDART00000029843^ENSDART00000132162
ENSDARG00000008249		NNN	0.999736	0.999736	1	1		ENSDARG00000008249.8	patched domain containing 4	ZDB-GENE-041001-178	ptchd4	ZDB-GENE-041001-178	protein_coding	ensembl_havana_gene	ENSDART00000146055.3	ENSDART00000146055
ENSDARG00000008255		NNN	0.903272	0.903272	0.99978	0.999887		ENSDARG00000008255.10	CCR4-NOT transcription complex, subunit 6a	ZDB-GENE-030131-2768	cnot6	ZDB-GENE-030131-2768	protein_coding	ensembl_havana_gene	ENSDART00000031028.8	ENSDART00000031028
ENSDARG00000008263		NNN	0.990178	0.990178	0.999519	0.998162		ENSDARG00000008263.7	major facilitator superfamily domain containing 4Ab	ZDB-GENE-060810-38	DKEY-3L8.6	—	protein_coding	ensembl_havana_gene	ENSDART00000010270.6	ENSDART00000010270
ENSDARG00000008275		NNG	0.130925	0.423678	0.130925	0.636075		ENSDARG00000008275.10	kelch-like family member 24b	ZDB-GENE-040426-1185	DKEY-218C16.1	—	protein_coding	ensembl_havana_gene	ENSDART00000015628.9	ENSDART00000015628^ENSDART00000132235
ENSDARG00000008278		NNN	1	1	1	1		ENSDARG00000008278.9	REST corepressor 2	ZDB-GENE-040426-1812	rcor2	ZDB-GENE-040426-1812	protein_coding	ensembl_havana_gene	ENSDART00000002961.7	ENSDART00000002961^ENSDART00000131671^ENSDART00000173791^ENSDART00000173955^ENSDART00000174002
ENSDARG00000008279		NNN	0.810211	0.810211	0.995099	0.991431		ENSDARG00000008279.13	mitogen-activated protein kinase kinase 7	ZDB-GENE-090312-186	CH211-254D18.2	ZDB-GENE-090312-186	protein_coding	ensembl_havana_gene	ENSDART00000048191.7	ENSDART00000048191^ENSDART00000148086^ENSDART00000179047^ENSDART00000180413
ENSDARG00000008287		NGG	0.0382712	0.0382712	0.347946	0.643901		ENSDARG00000008287.11	family with sequence similarity 114, member A1	ZDB-GENE-070410-52	fam114a1	ZDB-GENE-070410-52	protein_coding	ensembl_havana_gene	ENSDART00000082063.7	ENSDART00000082063^ENSDART00000131548^ENSDART00000147228
ENSDARG00000008292		NNN	0.237247	0.996097	0.510062	0.237247		ENSDARG00000008292.9	eukaryotic translation initiation factor 2, subunit 3 gamma	ZDB-GENE-030131-5552	eif2s3	ZDB-GENE-030131-5552	protein_coding	ensembl_havana_gene	ENSDART00000023833.6	ENSDART00000023833^ENSDART00000135580^ENSDART00000139176^ENSDART00000145520
ENSDARG00000008305		NNN	0.444173	0.444173	0.999989	0.999992		ENSDARG00000008305.8	heart and neural crest derivatives expressed 2	ZDB-GENE-000511-1	hand2	ZDB-GENE-000511-1	protein_coding	ensembl_havana_gene	ENSDART00000020409.8	ENSDART00000020409
ENSDARG00000008306		NNN	0.52629	0.52629	0.643392	0.732629		ENSDARG00000008306.12	retinol dehydrogenase 5 (11-cis/9-cis)	ZDB-GENE-050208-411	DKEY-102C8.5	—	protein_coding	ensembl_havana_gene	ENSDART00000128590.3	ENSDART00000002348^ENSDART00000128590^ENSDART00000177475
ENSDARG00000008310		NPP	0.655936	0.655936	0.998987	0.981121		ENSDARG00000008310.8	inositol hexakisphosphate kinase 2a	ZDB-GENE-030131-760	ihpk2	—	protein_coding	ensembl_havana_gene	ENSDART00000002501.7	ENSDART00000002501^ENSDART00000132936^ENSDART00000138923^ENSDART00000144073
ENSDARG00000008322		NNN	0.718227	0.966928	0.858168	0.718227		ENSDARG00000008322.11	autophagy/beclin-1 regulator 1a	ZDB-GENE-111104-2	—	—	protein_coding	ensembl	ENSDART00000098033.6	ENSDART00000098033^ENSDART00000173466^ENSDART00000173695^ENSDART00000173734
ENSDARG00000008329		NNN	0.941724	0.941724	0.999999	1		ENSDARG00000008329.9	acid-sensing (proton-gated) ion channel 1a	ZDB-GENE-040513-2	accn2b	ZDB-GENE-040513-2	protein_coding	ensembl_havana_gene	ENSDART00000004588.7	ENSDART00000004588
ENSDARG00000008333		NNN	1	1	1	1		ENSDARG00000008333.9	zinc finger-like gene 2a	ZDB-GENE-030828-7	znfl2a	ZDB-GENE-030828-7	protein_coding	ensembl_havana_gene	ENSDART00000004071.7	ENSDART00000004071^ENSDART00000156248
ENSDARG00000008363		SGG	0.74094	1	0.790428	0.74094		ENSDARG00000008363.10	MCL1, BCL2 family apoptosis regulator b	ZDB-GENE-030825-1	mcl1b	ZDB-GENE-030825-1	protein_coding	ensembl_havana_gene	ENSDART00000149520.2	ENSDART00000148926^ENSDART00000149520
ENSDARG00000008370		NGG	0.0380486	0.0380486	0.317307	0.649231		ENSDARG00000008370.9	casein kinase 1, delta a	ZDB-GENE-030131-825	csnk1dl	—	protein_coding	ensembl_havana_gene	ENSDART00000025326.7	ENSDART00000025326^ENSDART00000175208
ENSDARG00000008372		NNN	0.70881	0.884412	0.901955	0.70881		ENSDARG00000008372.11	sprouty-related, EVH1 domain containing 2b	ZDB-GENE-040426-2342	DKEY-66M17.3	ZDB-GENE-040426-2342	protein_coding	ensembl_havana_gene	ENSDART00000045292.7	ENSDART00000045292
ENSDARG00000008377		NGG	0.2719	0.2719	0.8771	0.913849		ENSDARG00000008377.11	epsin 2	ZDB-GENE-071212-1	CH211-106E12.3	—	protein_coding	ensembl_havana_gene	ENSDART00000156038.2	ENSDART00000153866^ENSDART00000156038^ENSDART00000183127^ENSDART00000184573^ENSDART00000184614^ENSDART00000186292
ENSDARG00000008380		NNN	0.998691	0.998691	0.999999	1		ENSDARG00000008380.11	bromodomain containing 7	ZDB-GENE-040426-2687	brd7	ZDB-GENE-040426-2687	protein_coding	ensembl_havana_gene	ENSDART00000143300.3	ENSDART00000143300
ENSDARG00000008383		SPP	0.984831	1	0.999992	0.984831		ENSDARG00000008383.6	actin related protein 2/3 complex, subunit 1A	ZDB-GENE-040116-1	arpc1a	ZDB-GENE-040116-1	protein_coding	ensembl_havana_gene	ENSDART00000014729.6	ENSDART00000014729
ENSDARG00000008384		NNN	0.389387	0.58144	0.389387	0.449878		ENSDARG00000008384.10	histone deacetylase 6	ZDB-GENE-030131-3232	hdac6	ZDB-GENE-030131-3232	protein_coding	ensembl_havana_gene	ENSDART00000148993.3	ENSDART00000148993^ENSDART00000149671^ENSDART00000180659
ENSDARG00000008388		NNN	0.0717777	0.745079	0.506715	0.0717777		ENSDARG00000008388.9	matrix metallopeptidase 14b (membrane-inserted)	ZDB-GENE-030901-2	mmp14b	ZDB-GENE-030901-2	protein_coding	ensembl_havana_gene	ENSDART00000044264.6	ENSDART00000044264
ENSDARG00000008395		NNN	0.282773	0.994657	0.282773	0.574593		ENSDARG00000008395.8	snurportin 1	ZDB-GENE-030131-3464	snupn	ZDB-GENE-030131-3464	protein_coding	ensembl_havana_gene	ENSDART00000012820.8	ENSDART00000012820^ENSDART00000139606^ENSDART00000180616
ENSDARG00000008396		NNN	0.419709	0.960908	0.419709	0.880715		ENSDARG00000008396.11	finTRIM family, member 24	ZDB-GENE-050731-2	CH211-77G15.2	ZDB-GENE-050731-2	protein_coding	ensembl_havana_gene	ENSDART00000056306.6	ENSDART00000056306
ENSDARG00000008398		NNN	0.993479	0.993479	1	1		ENSDARG00000008398.11	calcium channel, voltage-dependent, L type, alpha 1C subunit	ZDB-GENE-020129-1	cacna1c	ZDB-GENE-020129-1	protein_coding	ensembl_havana_gene	ENSDART00000132909.3	ENSDART00000028856^ENSDART00000132909
ENSDARG00000008403		SPP	1	1	1	1		ENSDARG00000008403.9	phosphatase, orphan 1	ZDB-GENE-040801-198	DKEY-91D10.1	ZDB-GENE-040801-198	protein_coding	ensembl_havana_gene	ENSDART00000055834.6	ENSDART00000055834^ENSDART00000183023
ENSDARG00000008407		NNN	1	1	1	1		ENSDARG00000008407.9	tetraspanin 7b	ZDB-GENE-040927-5	tspan7b	ZDB-GENE-040927-5	protein_coding	ensembl_havana_gene	ENSDART00000002691.9	ENSDART00000002691
ENSDARG00000008413		NNN	0.0340902	0.0524537	0.0340902	0.764896		ENSDARG00000008413.12	ATPase phospholipid transporting 11A	ZDB-GENE-090311-52	DKEY-251I8.1	—	protein_coding	ensembl_havana_gene	ENSDART00000150029.3	ENSDART00000040284^ENSDART00000132948^ENSDART00000145117^ENSDART00000150029^ENSDART00000193233
ENSDARG00000008414		NNN	0.0427396	0.466147	0.114234	0.0427396		ENSDARG00000008414.9	exocyst complex component 3-like 2a	ZDB-GENE-060526-343	DKEY-85K8.5	—	protein_coding	havana	ENSDART00000017138.8	ENSDART00000017138
ENSDARG00000008433		NNN	0.467432	0.999838	0.467432	0.924171		ENSDARG00000008433.10	unc-45 myosin chaperone B	ZDB-GENE-020919-3	unc45b	ZDB-GENE-020919-3	protein_coding	ensembl_havana_gene	ENSDART00000002164.9	ENSDART00000002164^ENSDART00000131171
ENSDARG00000008434		NNN	0.148513	0.148513	0.428569	0.343986		ENSDARG00000008434.10	bcl2-like 1	ZDB-GENE-010730-1	bcl2l	ZDB-GENE-010730-1	protein_coding	ensembl_havana_gene	ENSDART00000012507.8	ENSDART00000012507^ENSDART00000147617
ENSDARG00000008439		NNN	0.875491	0.980995	0.875491	0.937896		ENSDARG00000008439.10	ataxin 10	ZDB-GENE-060503-180	DKEYP-15G12.2	—	protein_coding	ensembl_havana_gene	ENSDART00000186518.1	ENSDART00000066980^ENSDART00000145747^ENSDART00000186518
ENSDARG00000008447		NPP	0.89297	0.89297	0.991281	0.996106		ENSDARG00000008447.11	FK506 binding protein 4	ZDB-GENE-030131-514	fkbp4	ZDB-GENE-030131-514	protein_coding	ensembl_havana_gene	ENSDART00000149350.2	ENSDART00000024576^ENSDART00000149350
ENSDARG00000008450		NNN	0.664305	0.974712	0.945356	0.664305		ENSDARG00000008450.13	procollagen C-endopeptidase enhancer 2a	ZDB-GENE-070705-25	CH211-126P4.4	—	protein_coding	ensembl_havana_gene	ENSDART00000040111.7	ENSDART00000040111^ENSDART00000142345^ENSDART00000156321
ENSDARG00000008454		NNN	0.968103	0.968103	0.97245	0.995971		ENSDARG00000008454.11	cytoplasmic polyadenylation element binding protein 1b	ZDB-GENE-990927-1	cpeb1b	ZDB-GENE-990927-1	protein_coding	ensembl_havana_gene	ENSDART00000098904.4	ENSDART00000024062^ENSDART00000098904^ENSDART00000174024^ENSDART00000174145
ENSDARG00000008457		NNN	0.485989	0.998722	0.485989	0.730517		ENSDARG00000008457.9	fatty acid amide hydrolase 2a	ZDB-GENE-040718-453	faah2a	CH211-113E8.1;ZDB-GENE-040718-453	protein_coding	ensembl_havana_gene	ENSDART00000037553.7	ENSDART00000037553^ENSDART00000149595
ENSDARG00000008461		NNN	0.422994	0.958793	0.422994	0.580363		ENSDARG00000008461.9	anaphase promoting complex subunit 5	ZDB-GENE-030131-1574	—	—	protein_coding	ensembl	ENSDART00000158927.3	ENSDART00000158927
ENSDARG00000008472		NNN	0.99779	0.99985	0.99779	0.999995		ENSDARG00000008472.7	APEX nuclease (apurinic/apyrimidinic endonuclease) 2	ZDB-GENE-040426-835	CH211-261N11.4	ZDB-GENE-040426-835	protein_coding	ensembl_havana_gene	ENSDART00000021514.7	ENSDART00000021514^ENSDART00000189272
ENSDARG00000008473		NNN	0.492739	0.656141	0.783019	0.492739		ENSDARG00000008473.9	ankyrin repeat and SOCS box containing 14a	ZDB-GENE-140106-2	asb14a	ZDB-GENE-140106-2	protein_coding	ensembl_havana_gene	ENSDART00000019008.9	ENSDART00000019008^ENSDART00000167529
ENSDARG00000008480		NNN	0.167089	0.9999	0.167089	0.484682		ENSDARG00000008480.11	tRNA methyltransferase 61A	ZDB-GENE-040718-5	CH211-219I7.1	ZDB-GENE-040718-5	protein_coding	ensembl_havana_gene	ENSDART00000003517.9	ENSDART00000003517^ENSDART00000130832^ENSDART00000135960
ENSDARG00000008485		NNN	0.999815	0.999815	1	1		ENSDARG00000008485.8	low density lipoprotein receptor-related protein 3	ZDB-GENE-080116-3	lrp3	ZDB-GENE-080116-3	protein_coding	ensembl_havana_gene	ENSDART00000016265.8	ENSDART00000016265
ENSDARG00000008487		NNN	0.980726	0.985874	0.980726	0.999672		ENSDARG00000008487.12	dystrophin	ZDB-GENE-010426-1	dmd	ZDB-GENE-010426-1	protein_coding	ensembl_havana_gene	ENSDART00000009886.9	ENSDART00000007013^ENSDART00000009886^ENSDART00000102903^ENSDART00000102923^ENSDART00000126518^ENSDART00000131744^ENSDART00000135563^ENSDART00000138275^ENSDART00000141052^ENSDART00000144095^ENSDART00000148305^ENSDART00000170290
ENSDARG00000008490		NGN	0.0425067	0.998512	0.398753	0.0425067		ENSDARG00000008490.9	LTV1 ribosome biogenesis factor	ZDB-GENE-040712-1	ltv1	ZDB-GENE-040712-1	protein_coding	ensembl_havana_gene	ENSDART00000010543.9	ENSDART00000010543^ENSDART00000167257
ENSDARG00000008491		SGG	0.618421	0.985985	0.618421	0.681097		ENSDARG00000008491.11	si:ch211-107o10.3	ZDB-GENE-030131-4716	CH211-107O10.3	ZDB-GENE-030131-4716	protein_coding	ensembl_havana_gene	ENSDART00000002075.10	ENSDART00000002075^ENSDART00000174420
ENSDARG00000008494		SNN	0.184134	1	0.184134	0.999701		ENSDARG00000008494.11	myosin, light chain 6, alkali, smooth muscle and non-muscle	ZDB-GENE-041010-28	myl6	ZDB-GENE-041010-28	protein_coding	ensembl_havana_gene	ENSDART00000130613.3	ENSDART00000077662^ENSDART00000130613^ENSDART00000135631^ENSDART00000137333^ENSDART00000138100^ENSDART00000141611
ENSDARG00000008502		NNG	0.0322368	0.999659	0.0322368	0.920795		ENSDARG00000008502.9	partner of NOB1 homolog	ZDB-GENE-040426-1419	CH211-274C22.4	ZDB-GENE-040426-1419	protein_coding	ensembl_havana_gene	ENSDART00000010261.9	ENSDART00000010261^ENSDART00000121970
ENSDARG00000008503		NNN	0.993155	1	0.993155	0.996538		ENSDARG00000008503.10	glucocorticoid induced 1a	ZDB-GENE-031010-41	glcci1	—	protein_coding	ensembl_havana_gene	ENSDART00000036854.9	ENSDART00000036854
ENSDARG00000008540		NNN	0.94812	0.999986	1	0.94812		ENSDARG00000008540.8	SRY (sex determining region Y)-box 21b	ZDB-GENE-040429-1	sox21b	ZDB-GENE-040429-1	protein_coding	ensembl_havana_gene	ENSDART00000003310.8	ENSDART00000003310
ENSDARG00000008541		NNN	0.259422	0.842287	0.879327	0.259422		ENSDARG00000008541.9	chitinase, acidic.4	ZDB-GENE-030131-9279	CH73-390P7.1	ZDB-GENE-030131-9279	protein_coding	ensembl_havana_gene	ENSDART00000012540.6	ENSDART00000012540^ENSDART00000132780
ENSDARG00000008542		NNN	0.996478	0.996478	1	1		ENSDARG00000008542.9	YOD1 deubiquitinase	ZDB-GENE-050417-217	DKEY-37M22.2	ZDB-GENE-050417-217	protein_coding	ensembl_havana_gene	ENSDART00000023388.8	ENSDART00000023388^ENSDART00000142734^ENSDART00000177280
ENSDARG00000008548		SGG	0.460645	0.999994	0.460645	0.76351		ENSDARG00000008548.11	Rho GTPase activating protein 12a	ZDB-GENE-050809-38	CH211-159P3.6	—	protein_coding	ensembl_havana_gene	ENSDART00000142804.3	ENSDART00000135836^ENSDART00000138620^ENSDART00000142804
ENSDARG00000008551		NNN	0.876242	0.998553	0.876242	0.970964		ENSDARG00000008551.7	polymerase (DNA directed), epsilon 3 (p17 subunit)	ZDB-GENE-040426-1773	CH211-208H16.1	—	protein_coding	ensembl_havana_gene	ENSDART00000007512.7	ENSDART00000007512
ENSDARG00000008553		NNN	0.462867	0.541814	0.462867	0.867801		ENSDARG00000008553.11	zgc:136872	ZDB-GENE-060421-5204	CH1073-406M8.1	ZDB-GENE-060421-5204	protein_coding	ensembl_havana_gene	ENSDART00000155323.3	ENSDART00000122453^ENSDART00000155323
ENSDARG00000008560		NNN	0.792088	0.878627	0.792088	0.878391		ENSDARG00000008560.9	BRCA1 associated protein	ZDB-GENE-040718-168	—	—	protein_coding	ensembl	ENSDART00000109148.4	ENSDART00000109148
ENSDARG00000008568		SGG	0.22048	0.999997	0.22048	0.336256		ENSDARG00000008568.11	solute carrier family 25 (mitochondrial carrier; phosphate carrier), member 24	ZDB-GENE-040912-183	CH211-63O20.9	ZDB-GENE-040912-183	protein_coding	ensembl_havana_gene	ENSDART00000033325.8	ENSDART00000033325^ENSDART00000132545
ENSDARG00000008573		SNN	0.030233	0.998111	0.030233	0.303884		ENSDARG00000008573.11	family with sequence similarity 20, member B (H. sapiens)	ZDB-GENE-040724-125	fam20b	ZDB-GENE-040724-125	protein_coding	ensembl_havana_gene	ENSDART00000013453.10	ENSDART00000013453^ENSDART00000152354^ENSDART00000152357^ENSDART00000152412^ENSDART00000152828^ENSDART00000189421
ENSDARG00000008575		NNN	0.681072	0.681072	0.994674	0.99468		ENSDARG00000008575.11	lysosomal trafficking regulator	ZDB-GENE-070702-1	—	—	protein_coding	ensembl	ENSDART00000099439.5	ENSDART00000099439
ENSDARG00000008592		NGG	0.126473	0.15938	0.29737	0.126473		ENSDARG00000008592.7	myotubularin related protein 8	ZDB-GENE-040426-1016	DKEY-286F3.1	ZDB-GENE-040426-1016	protein_coding	ensembl_havana_gene	ENSDART00000002938.7	ENSDART00000002938^ENSDART00000133724^ENSDART00000146519
ENSDARG00000008593		NNN	0.328096	0.935458	0.37997	0.328096		ENSDARG00000008593.12	neuroblastoma amplified sequence	ZDB-GENE-041014-367	nbas	—	protein_coding	ensembl_havana_gene	ENSDART00000047834.9	ENSDART00000047834^ENSDART00000138708
ENSDARG00000008623		NNN	0.700154	0.985152	0.717734	0.700154		ENSDARG00000008623.8	COP9 signalosome subunit 3	ZDB-GENE-030131-7660	—	—	protein_coding	ensembl	ENSDART00000018752.8	ENSDART00000018752
ENSDARG00000008637		NNN	0.333274	0.617556	0.333274	0.378301		ENSDARG00000008637.10	microsomal triglyceride transfer protein	ZDB-GENE-040419-2	mtp	ZDB-GENE-040419-2	protein_coding	ensembl_havana_gene	ENSDART00000015251.9	ENSDART00000015251^ENSDART00000079930^ENSDART00000164817
ENSDARG00000008639		NNN	0.932881	0.932881	1	1		ENSDARG00000008639.10	kinesin-associated protein 3a	ZDB-GENE-040912-74	kifap3a	ZDB-GENE-040912-74	protein_coding	ensembl_havana_gene	ENSDART00000005609.10	ENSDART00000005609
ENSDARG00000008660		NNN	0.917176	0.917176	1	1		ENSDARG00000008660.9	coronin, actin binding protein, 1B	ZDB-GENE-040123-3	coro1b	ZDB-GENE-040123-3	protein_coding	ensembl_havana_gene	ENSDART00000021559.9	ENSDART00000021559^ENSDART00000173801
ENSDARG00000008662		NNN	0.640877	0.640877	0.999999	1		ENSDARG00000008662.8	fidgetin	ZDB-GENE-050522-339	—	—	protein_coding	ensembl	ENSDART00000187567.1	ENSDART00000023105^ENSDART00000181015^ENSDART00000187567
ENSDARG00000008678		NNN	0.180057	0.999566	0.490631	0.180057		ENSDARG00000008678.11	sorting nexin 3	ZDB-GENE-030131-921	snx3	ZDB-GENE-030131-921	protein_coding	ensembl_havana_gene	ENSDART00000018640.11	ENSDART00000018640^ENSDART00000134312^ENSDART00000137910
ENSDARG00000008697		SPP	0.999976	1	0.999999	0.999976		ENSDARG00000008697.10	endothelial PAS domain protein 1a	ZDB-GENE-030131-4490	epas1a	ZDB-GENE-030131-4490	protein_coding	ensembl_havana_gene	ENSDART00000024415.9	ENSDART00000024415^ENSDART00000149198
ENSDARG00000008703		NGG	0.326062	0.987956	0.326062	0.918613		ENSDARG00000008703.9	acylaminoacyl-peptide hydrolase	ZDB-GENE-030131-9870	—	—	protein_coding	ensembl	ENSDART00000098031.5	ENSDART00000098031
ENSDARG00000008706		NNN	0.86299	0.942607	0.86299	0.894155		ENSDARG00000008706.8	poly(A) binding protein interacting protein 2B	ZDB-GENE-040426-1736	CH211-89O9.1	ZDB-GENE-040426-1736	protein_coding	ensembl_havana_gene	ENSDART00000010211.7	ENSDART00000010211^ENSDART00000135280
ENSDARG00000008720		NNN	0.998912	0.998912	1	1		ENSDARG00000008720.9	LIM domain only 3	ZDB-GENE-050522-201	lmo3	ZDB-GENE-050522-201	protein_coding	ensembl_havana_gene	ENSDART00000112860.3	ENSDART00000003583^ENSDART00000112860^ENSDART00000133767^ENSDART00000134362^ENSDART00000181201
ENSDARG00000008723		SGG	0.115681	1	0.399059	0.115681		ENSDARG00000008723.9	protein kinase C, beta a	ZDB-GENE-040426-1354	prkcba	ZDB-GENE-040426-1354	protein_coding	ensembl_havana_gene	ENSDART00000006211.9	ENSDART00000006211^ENSDART00000137211
ENSDARG00000008727		NNN	0.971737	0.998126	0.971737	0.998698		ENSDARG00000008727.10	RAN binding protein 3a	ZDB-GENE-040426-1132	ranbp3a	ZDB-GENE-040426-1132	protein_coding	ensembl_havana_gene	ENSDART00000139882.3	ENSDART00000139882
ENSDARG00000008732		NGB	0.0409681	0.856098	0.0409681	0.998776		ENSDARG00000008732.8	zgc:66479	ZDB-GENE-031030-10	CH73-381B11.1	ZDB-GENE-031030-10	protein_coding	ensembl_havana_gene	ENSDART00000011970.7	ENSDART00000011970
ENSDARG00000008735		NNN	0.572282	0.572282	0.945184	0.989704		ENSDARG00000008735.11	ATPase H+ transporting accessory protein 2	ZDB-GENE-040426-1960	atp6ap2	ZDB-GENE-040426-1960	protein_coding	ensembl_havana_gene	ENSDART00000125561.4	ENSDART00000016873^ENSDART00000125561^ENSDART00000149634^ENSDART00000178882
ENSDARG00000008740		NNN	0.067983	0.999903	0.067983	0.548596		ENSDARG00000008740.8	ESF1, nucleolar pre-rRNA processing protein, homolog (S. cerevisiae)	ZDB-GENE-030131-4917	esf1	ZDB-GENE-030131-4917	protein_coding	ensembl_havana_gene	ENSDART00000146612.2	ENSDART00000141856^ENSDART00000146612
ENSDARG00000008748		NNN	0.0249991	0.18174	0.0249991	0.0282083		ENSDARG00000008748.8	ubiquitin-conjugating enzyme E2Na	ZDB-GENE-040426-2873	ube2n	ZDB-GENE-040426-2873	protein_coding	ensembl_havana_gene	ENSDART00000014188.7	ENSDART00000014188
ENSDARG00000008757		NGG	0.0684373	0.0684373	0.832682	0.941319		ENSDARG00000008757.9	ectonucleoside triphosphate diphosphohydrolase 6 (putative)	ZDB-GENE-050417-412	entpd6	ZDB-GENE-050417-412	protein_coding	ensembl_havana_gene	ENSDART00000035432.7	ENSDART00000035432
ENSDARG00000008765		NGG	0.185328	0.655464	0.485374	0.185328		ENSDARG00000008765.5	transmembrane p24 trafficking protein 5	ZDB-GENE-040426-1302	tmed5	ZDB-GENE-040426-1302	protein_coding	ensembl_havana_gene	ENSDART00000002463.5	ENSDART00000002463^ENSDART00000164761
ENSDARG00000008767		NNN	0.980701	0.980701	1	1		ENSDARG00000008767.12	transducin like enhancer of split 2b	ZDB-GENE-050208-677	DKEY-42P8.3	ZDB-GENE-030131-2826	protein_coding	ensembl_havana_gene	ENSDART00000149635.2	ENSDART00000105561^ENSDART00000149635^ENSDART00000150074^ENSDART00000183668
ENSDARG00000008772		NNN	0.573458	0.997804	0.573458	0.725054		ENSDARG00000008772.9	calcium channel, voltage-dependent, gamma subunit 1a	ZDB-GENE-030131-732	—	—	protein_coding	ensembl	ENSDART00000006843.8	ENSDART00000006843^ENSDART00000171479
ENSDARG00000008784		NNN	0.944039	0.944039	0.99998	1		ENSDARG00000008784.10	pre-mRNA processing factor 4Ba	ZDB-GENE-040426-947	DKEY-71K24.2	—	protein_coding	ensembl_havana_gene	ENSDART00000098834.5	ENSDART00000098834^ENSDART00000180409
ENSDARG00000008785		NNN	0.506418	0.985405	0.658597	0.506418		ENSDARG00000008785.7	dihydrolipoamide dehydrogenase	ZDB-GENE-040120-4	dldh	ZDB-GENE-040120-4	protein_coding	ensembl_havana_gene	ENSDART00000006709.7	ENSDART00000006709
ENSDARG00000008788		NNN	0.0464377	0.0464377	0.661241	0.871002		ENSDARG00000008788.9	calcium/calmodulin-dependent protein kinase IGb	ZDB-GENE-040426-1694	CH211-226F1.3	ZDB-GENE-040426-1694	protein_coding	ensembl_havana_gene	ENSDART00000017902.8	ENSDART00000017902
ENSDARG00000008790		SGG	0.261921	0.998959	0.261921	0.371402		ENSDARG00000008790.12	ARP3 actin related protein 3 homolog B	ZDB-GENE-070424-10	DKEY-148G10.1	—	protein_coding	ensembl_havana_gene	ENSDART00000045150.7	ENSDART00000045150^ENSDART00000167570
ENSDARG00000008796		NNN	0.557974	0.994983	0.557974	0.637699		ENSDARG00000008796.11	hairy-related 5	ZDB-GENE-990415-90	her5	ZDB-GENE-990415-90	protein_coding	ensembl_havana_gene	ENSDART00000145336.3	ENSDART00000145336
ENSDARG00000008803		NNN	0.999433	0.999433	1	1		ENSDARG00000008803.9	myristoylated alanine-rich protein kinase C substrate b	ZDB-GENE-030131-1921	marcksb	ZDB-GENE-030131-1921	protein_coding	ensembl_havana_gene	ENSDART00000002932.7	ENSDART00000002932^ENSDART00000148443^ENSDART00000159426
ENSDARG00000008805		NNN	0.158876	0.999138	0.158876	0.243912		ENSDARG00000008805.11	origin recognition complex, subunit 3	ZDB-GENE-030131-6247	orc3	ZDB-GENE-030131-6247	protein_coding	ensembl_havana_gene	ENSDART00000047857.8	ENSDART00000047857^ENSDART00000154600^ENSDART00000157381
ENSDARG00000008807		NNN	0.0242189	0.613001	0.0242189	0.0941543		ENSDARG00000008807.11	BOK, BCL2 family apoptosis regulator b	ZDB-GENE-040426-1346	bokb	ZDB-GENE-040426-1346	protein_coding	ensembl_havana_gene	ENSDART00000144890.2	ENSDART00000144890
ENSDARG00000008808		NNN	0.105804	0.105804	0.405127	0.379832		ENSDARG00000008808.11	echinoderm microtubule associated protein like 2	ZDB-GENE-050706-71	eml2	ZDB-GENE-050706-71	protein_coding	ensembl_havana_gene	ENSDART00000192461.1	ENSDART00000017268^ENSDART00000155154^ENSDART00000155305^ENSDART00000182790^ENSDART00000192461
ENSDARG00000008811		NNN	0.549738	0.917808	0.684064	0.549738		ENSDARG00000008811.10	CKLF-like MARVEL transmembrane domain containing 3	ZDB-GENE-040801-206	cmtm3	ZDB-GENE-040801-206	protein_coding	ensembl_havana_gene	ENSDART00000005033.10	ENSDART00000005033^ENSDART00000149981
ENSDARG00000008816		SGG	0.380147	0.99977	0.380147	0.890673		ENSDARG00000008816.10	glutamate dehydrogenase 1a	ZDB-GENE-030114-2	glud1a	ZDB-GENE-030114-2	protein_coding	ensembl_havana_gene	ENSDART00000016946.10	ENSDART00000016946
ENSDARG00000008818		NNN	0.708598	0.899897	0.708598	0.768795		ENSDARG00000008818.11	heat shock transcription factor 1	ZDB-GENE-000616-16	hsf1	ZDB-GENE-000616-16	protein_coding	ensembl_havana_gene	ENSDART00000141324.4	ENSDART00000082353^ENSDART00000136963^ENSDART00000141324
ENSDARG00000008829		NNN	0.888109	0.941887	0.888109	0.950277		ENSDARG00000008829.8	chromogranin A	ZDB-GENE-041010-161	chga	ZDB-GENE-041010-161	protein_coding	ensembl_havana_gene	ENSDART00000016014.6	ENSDART00000016014^ENSDART00000126919
ENSDARG00000008832		NNN	0.212839	0.689077	0.307522	0.212839		ENSDARG00000008832.11	neuraminidase 1	ZDB-GENE-060503-592	neu1	ZDB-GENE-060503-592	protein_coding	ensembl_havana_gene	ENSDART00000002464.10	ENSDART00000002464^ENSDART00000149132
ENSDARG00000008835		NGG	0.199416	0.316142	0.335022	0.199416		ENSDARG00000008835.10	si:dkey-46g23.5	ZDB-GENE-030131-9306	DKEY-46G23.5	—	protein_coding	ensembl_havana_gene	ENSDART00000078886.6	ENSDART00000021286^ENSDART00000078886
ENSDARG00000008840		NNG	0.791718	1	0.949482	0.791718		ENSDARG00000008840.10	hydroxymethylbilane synthase a	ZDB-GENE-040426-1375	hmbs	ZDB-GENE-040426-1375	protein_coding	ensembl_havana_gene	ENSDART00000013431.6	ENSDART00000013431^ENSDART00000132664^ENSDART00000161836
ENSDARG00000008849		NNN	0.109678	0.13727	0.86881	0.109678		ENSDARG00000008849.12	protein tyrosine phosphatase, receptor type, Q	ZDB-GENE-050419-183	CH211-11F8.3	—	protein_coding	havana	ENSDART00000143740.2	ENSDART00000136951^ENSDART00000143740
ENSDARG00000008852		NNN	0.0344391	0.999147	0.106023	0.0344391		ENSDARG00000008852.10	elongator acetyltransferase complex subunit 4	ZDB-GENE-050417-114	—	—	protein_coding	ensembl	ENSDART00000162962.2	ENSDART00000002498^ENSDART00000162962
ENSDARG00000008858		SGG	0.021904	0.999071	0.0981636	0.021904		ENSDARG00000008858.10	cytochrome P450, family 7, subfamily B, polypeptide 1	ZDB-GENE-070912-293	CH211-39L18.4	—	protein_coding	ensembl_havana_gene	ENSDART00000008268.9	ENSDART00000008268
ENSDARG00000008859		SNN	0.0267608	0.997365	0.0267608	0.225519		ENSDARG00000008859.8	myosin regulatory light chain interacting protein a	ZDB-GENE-030131-7831	mylip	ZDB-GENE-030131-7831	protein_coding	ensembl_havana_gene	ENSDART00000013497.8	ENSDART00000013497
ENSDARG00000008861		NNN	0.999637	0.999637	0.999878	1		ENSDARG00000008861.7	transcription factor AP-2 epsilon	ZDB-GENE-040426-1455	tfap2e	ZDB-GENE-040426-1455	protein_coding	ensembl_havana_gene	ENSDART00000168792.2	ENSDART00000025931^ENSDART00000168792^ENSDART00000190005
ENSDARG00000008866		NNN	0.193072	0.548969	0.193072	0.999662		ENSDARG00000008866.10	calcium binding protein 4	ZDB-GENE-081104-291	CH73-56F16.1	—	protein_coding	ensembl_havana_gene	ENSDART00000177174.2	ENSDART00000137021^ENSDART00000177174
ENSDARG00000008867		SGG	0.0296592	0.997305	0.0750096	0.0296592		ENSDARG00000008867.10	RAP1B, member of RAS oncogene family	ZDB-GENE-030131-9662	rap1b	ZDB-GENE-030131-9662	protein_coding	ensembl_havana_gene	ENSDART00000132081.3	ENSDART00000042250^ENSDART00000132081
ENSDARG00000008880		NNN	0.497984	0.999891	0.497984	0.860538		ENSDARG00000008880.11	ubiquitin specific peptidase 28	ZDB-GENE-041008-142	DKEYP-14B8.7	—	protein_coding	ensembl_havana_gene	ENSDART00000190386.1	ENSDART00000003076^ENSDART00000147896^ENSDART00000184925^ENSDART00000190386
ENSDARG00000008884		NGN	0.0382447	0.992659	0.623497	0.0382447		ENSDARG00000008884.11	hypoxanthine phosphoribosyltransferase 1	ZDB-GENE-040426-1918	hprt1	ZDB-GENE-040426-1918	protein_coding	ensembl_havana_gene	ENSDART00000024075.10	ENSDART00000024075^ENSDART00000124499
ENSDARG00000008886		SGG	0.496273	0.999994	0.823091	0.496273		ENSDARG00000008886.11	muscle segment homeobox 1b	ZDB-GENE-980526-26	msxb	ZDB-GENE-980526-26	protein_coding	ensembl_havana_gene	ENSDART00000008468.10	ENSDART00000008468
ENSDARG00000008890		NPG	0.0532195	0.0532195	0.998889	0.0585738		ENSDARG00000008890.8	cystinosin, lysosomal cystine transporter	ZDB-GENE-050522-352	ctns	ZDB-GENE-050522-352	protein_coding	ensembl_havana_gene	ENSDART00000002459.8	ENSDART00000002459
ENSDARG00000008904		NNN	0.0383042	0.704646	0.102515	0.0383042		ENSDARG00000008904.13	SWI/SNF related, matrix associated, actin dependent regulator of chromatin, subfamily a, member 2	ZDB-GENE-030131-5964	smarca2	ZDB-GENE-030131-5964	protein_coding	ensembl_havana_gene	ENSDART00000041412.9	ENSDART00000041412^ENSDART00000113738^ENSDART00000136002^ENSDART00000172702
ENSDARG00000008906		NNN	0.879478	0.879478	0.99371	0.992693		ENSDARG00000008906.10	si:ch211-241e1.5	ZDB-GENE-030131-6298	CH211-241E1.5	ZDB-GENE-030131-6298	protein_coding	ensembl_havana_gene	ENSDART00000137477.3	ENSDART00000137477
ENSDARG00000008912		NNN	0.329621	0.605285	0.329621	0.847197		ENSDARG00000008912.13	solute carrier family 8 (sodium/calcium exchanger), member 2a	ZDB-GENE-060531-155	slc8a2a	ZDB-GENE-060531-155	protein_coding	ensembl_havana_gene	ENSDART00000145182.3	ENSDART00000145182
ENSDARG00000008920		NNN	0.479645	0.970577	0.479645	0.775565		ENSDARG00000008920.9	mitochondrial ribosomal protein L53	ZDB-GENE-040912-93	DKEY-241P5.1	ZDB-GENE-040912-93	protein_coding	ensembl_havana_gene	ENSDART00000005255.9	ENSDART00000005255
ENSDARG00000008931		NNN	0.611188	0.999131	0.864025	0.611188		ENSDARG00000008931.10	renin binding protein	ZDB-GENE-041212-34	renbp	—	protein_coding	ensembl_havana_gene	ENSDART00000139567.2	ENSDART00000139567
ENSDARG00000008936		NNN	0.146591	0.81078	0.146591	0.658869		ENSDARG00000008936.6	SEC11 homolog A, signal peptidase complex subunit	ZDB-GENE-040718-227	DKEY-77F17.7	—	protein_coding	ensembl_havana_gene	ENSDART00000008013.6	ENSDART00000008013
ENSDARG00000008946		NNN	0.159799	0.771145	0.207261	0.159799		ENSDARG00000008946.7	coiled-coil domain containing 127b	ZDB-GENE-060503-656	ccdc127	ZDB-GENE-060503-656	protein_coding	ensembl_havana_gene	ENSDART00000026634.7	ENSDART00000026634^ENSDART00000140459
ENSDARG00000008947		NNN	0.999527	0.999527	0.999974	0.999875		ENSDARG00000008947.10	RTF1 homolog, Paf1/RNA polymerase II complex component	ZDB-GENE-030131-6778	rtf1	ZDB-GENE-030131-6778	protein_coding	ensembl_havana_gene	ENSDART00000130127.4	ENSDART00000130127
ENSDARG00000008948		NNN	0.35342	0.35342	0.891844	0.995578		ENSDARG00000008948.6	zgc:123275	ZDB-GENE-051113-96	—	—	protein_coding	ensembl	ENSDART00000003242.6	ENSDART00000003242
ENSDARG00000008953		NNG	0.0891055	0.66608	0.0891055	0.42016		ENSDARG00000008953.9	protein O-fucosyltransferase 1	ZDB-GENE-040303-2	pofut1	ZDB-GENE-040303-2	protein_coding	ensembl_havana_gene	ENSDART00000018512.9	ENSDART00000018512
ENSDARG00000008966		NNN	0.982973	0.982973	0.999377	0.995913		ENSDARG00000008966.13	transducin (beta)-like 1 X-linked receptor 1b	ZDB-GENE-040426-1192	tbl1xr1	ZDB-GENE-040426-1192	protein_coding	ensembl_havana_gene	ENSDART00000146360.4	ENSDART00000146360
ENSDARG00000008969		NNN	0.999474	0.999474	0.999999	1		ENSDARG00000008969.12	fibrinogen beta chain	ZDB-GENE-030131-9261	fgb	ZDB-GENE-030131-9261	protein_coding	ensembl_havana_gene	ENSDART00000011701.7	ENSDART00000011701^ENSDART00000133465^ENSDART00000134835^ENSDART00000139358^ENSDART00000144756
ENSDARG00000008976		NNN	0.696182	0.998967	0.78111	0.696182		ENSDARG00000008976.12	midasin AAA ATPase 1	ZDB-GENE-041001-138	mdn1	ZDB-GENE-041001-138	protein_coding	ensembl_havana_gene	ENSDART00000143005.4	ENSDART00000143005
ENSDARG00000008979		NGN	0.214116	0.412863	0.214116	0.24665		ENSDARG00000008979.10	golgin A1	ZDB-GENE-040426-1237	CH211-158D24.1	ZDB-GENE-040426-1237	protein_coding	ensembl_havana_gene	ENSDART00000098578.5	ENSDART00000019858^ENSDART00000098578^ENSDART00000112214^ENSDART00000167283^ENSDART00000180666
ENSDARG00000008982		NNN	0.47075	0.993077	0.47075	0.745038		ENSDARG00000008982.7	calsequestrin 2	ZDB-GENE-010724-12	casq2	ZDB-GENE-010724-12	protein_coding	ensembl_havana_gene	ENSDART00000013918.7	ENSDART00000013918
ENSDARG00000008983		NNN	0.983958	0.983958	0.99958	0.992015		ENSDARG00000008983.13	SH3-domain GRB2-like endophilin B2a	ZDB-GENE-061201-8	CH1073-277F7.1	ZDB-GENE-050522-459	protein_coding	ensembl_havana_gene	ENSDART00000051403.8	ENSDART00000051403^ENSDART00000154529^ENSDART00000155092^ENSDART00000155275^ENSDART00000156796^ENSDART00000160551
ENSDARG00000008986		NNN	0.670071	0.985015	0.905422	0.670071		ENSDARG00000008986.10	E2F transcription factor 7	ZDB-GENE-030131-3527	e2f7	ZDB-GENE-030131-3527	protein_coding	ensembl_havana_gene	ENSDART00000140760.3	ENSDART00000140760^ENSDART00000150619
ENSDARG00000009001		NNN	0.33952	0.33952	0.760275	0.922802		ENSDARG00000009001.9	protein disulfide isomerase family A, member 6	ZDB-GENE-030131-879	pdip5	ZDB-GENE-030131-879	protein_coding	ensembl_havana_gene	ENSDART00000020252.7	ENSDART00000020252^ENSDART00000153164
ENSDARG00000009014		NNN	0.28818	0.807815	0.28818	0.808714		ENSDARG00000009014.12	collagen, type XI, alpha 1b	ZDB-GENE-070912-607	col11a1b	ZDB-GENE-070912-607	protein_coding	ensembl_havana_gene	ENSDART00000049589.9	ENSDART00000049589
ENSDARG00000009018		NGG	0.221648	0.221648	0.276381	0.515982		ENSDARG00000009018.12	Rh family, B glycoprotein (gene/pseudogene)	ZDB-GENE-030131-9542	rhbg	—	protein_coding	ensembl_havana_gene	ENSDART00000058870.6	ENSDART00000058870
ENSDARG00000009020		NNN	0.925729	0.925729	0.998471	0.999968		ENSDARG00000009020.9	cannabinoid receptor 1	ZDB-GENE-040312-3	cnr1	ZDB-GENE-040312-3	protein_coding	ensembl_havana_gene	ENSDART00000011283.7	ENSDART00000011283^ENSDART00000164816
ENSDARG00000009021		NNN	0.709418	0.990197	0.709418	0.959407		ENSDARG00000009021.8	cholinergic receptor, nicotinic, alpha 1 (muscle)	ZDB-GENE-980526-137	chrna1	ZDB-GENE-980526-137	protein_coding	ensembl_havana_gene	ENSDART00000020261.8	ENSDART00000020261^ENSDART00000131458^ENSDART00000138203
ENSDARG00000009023		NNN	0.489491	0.983325	0.711816	0.489491		ENSDARG00000009023.10	ankyrin repeat domain 28b	ZDB-GENE-070622-4	ankrd28	ZDB-GENE-070622-4	protein_coding	ensembl_havana_gene	ENSDART00000146436.2	ENSDART00000027020^ENSDART00000146436
ENSDARG00000009026		NNN	1	1	1	1		ENSDARG00000009026.10	ankyrin 2a, neuronal	ZDB-GENE-111215-3	—	—	protein_coding	ensembl	ENSDART00000021693.9	ENSDART00000021693
ENSDARG00000009031		NNN	0.0215238	0.0215238	0.0305986	0.0222646		ENSDARG00000009031.11	TRAF2 and NCK interacting kinase b	ZDB-GENE-051113-320	CH211-230G15.3	ZDB-GENE-051113-320	protein_coding	ensembl_havana_gene	ENSDART00000097792.4	ENSDART00000008374^ENSDART00000017384^ENSDART00000097792^ENSDART00000138089^ENSDART00000182044
ENSDARG00000009040		SPG	0.136124	0.992349	0.993218	0.136124		ENSDARG00000009040.11	si:ch73-141c7.1	ZDB-GENE-040426-1760	CH73-141C7.1	ZDB-GENE-040426-1760	protein_coding	ensembl_havana_gene	ENSDART00000013540.9	ENSDART00000013540^ENSDART00000155195
ENSDARG00000009046		NNN	0.956225	0.956225	0.998433	0.998297		ENSDARG00000009046.10	nephronophthisis 1	ZDB-GENE-060929-1234	nphp1	ZDB-GENE-060929-1234	protein_coding	ensembl_havana_gene	ENSDART00000063716.7	ENSDART00000063716^ENSDART00000141684
ENSDARG00000009074		NNN	0.598749	0.945374	0.598749	0.672656		ENSDARG00000009074.9	carbonyl reductase 4	ZDB-GENE-040426-1796	cbr4	ZDB-GENE-040426-1796	protein_coding	ensembl_havana_gene	ENSDART00000016913.8	ENSDART00000016913^ENSDART00000149735
ENSDARG00000009079		NNN	0.997345	0.999972	0.99994	0.997345		ENSDARG00000009079.10	—	—	CH211-224L10.5	—	processed_transcript	ensembl_havana_gene	ENSDART00000179230.2	ENSDART00000140956^ENSDART00000179230
ENSDARG00000009087		NNN	0.297342	0.724376	0.297342	0.785595		ENSDARG00000009087.11	CD74 molecule, major histocompatibility complex, class II invariant chain a	ZDB-GENE-000901-1	iclp1	ZDB-GENE-000901-1	protein_coding	ensembl_havana_gene	ENSDART00000026021.8	ENSDART00000026021^ENSDART00000149844^ENSDART00000150000
ENSDARG00000009094		NNN	0.856728	0.856728	0.994549	0.887126		ENSDARG00000009094.8	GATA binding protein 2b	ZDB-GENE-040718-440	GATA2b	ZDB-GENE-040718-440	protein_coding	ensembl_havana_gene	ENSDART00000144479.2	ENSDART00000144479
ENSDARG00000009106		NNN	0.683042	0.683042	0.999842	1		ENSDARG00000009106.11	serine incorporator 1	ZDB-GENE-030131-4415	serinc1	ZDB-GENE-030131-4415	protein_coding	ensembl_havana_gene	ENSDART00000017553.11	ENSDART00000017553^ENSDART00000153119^ENSDART00000153334
ENSDARG00000009113		NNN	0.27185	0.27185	0.438285	0.933285		ENSDARG00000009113.7	phosphatidylinositol glycan anchor biosynthesis, class C	ZDB-GENE-030131-2714	pigc	ZDB-GENE-030131-2714	protein_coding	ensembl_havana_gene	ENSDART00000010550.7	ENSDART00000010550
ENSDARG00000009123		NNN	0.949572	0.999997	0.949572	0.960628		ENSDARG00000009123.11	selectin E	ZDB-GENE-041014-221	sele	ZDB-GENE-041014-221	protein_coding	ensembl_havana_gene	ENSDART00000136834.4	ENSDART00000111022^ENSDART00000136834
ENSDARG00000009131		NNN	0.999998	1	0.999998	0.999998		ENSDARG00000009131.13	solute carrier family 10, member 4	ZDB-GENE-041014-249	slc10a4	ZDB-GENE-041014-249	protein_coding	ensembl_havana_gene	ENSDART00000022887.9	ENSDART00000022887^ENSDART00000153386
ENSDARG00000009133		SGG	0.0396381	1	0.0396381	0.0814711		ENSDARG00000009133.8	myosin IE, b	ZDB-GENE-040426-1347	DKEY-23O4.2	ZDB-GENE-040426-1347	protein_coding	ensembl_havana_gene	ENSDART00000044971.6	ENSDART00000044971
ENSDARG00000009134		NNN	0.999689	0.999997	0.999689	0.999992		ENSDARG00000009134.9	H2.0-like homeo box 1 (Drosophila)	ZDB-GENE-030131-5304	hlx1	ZDB-GENE-030131-5304	protein_coding	ensembl_havana_gene	ENSDART00000131806.3	ENSDART00000131806^ENSDART00000143668
ENSDARG00000009136		NGG	0.291794	0.291794	0.588056	0.453858		ENSDARG00000009136.11	tumor protein p53 binding protein, 2a	ZDB-GENE-040516-8	tp53bp2	ZDB-GENE-040516-8	protein_coding	ensembl_havana_gene	ENSDART00000006892.11	ENSDART00000006892
ENSDARG00000009142		NNN	0.545906	0.545906	0.756201	0.99965		ENSDARG00000009142.12	protein phosphatase 1, regulatory subunit 13Bb	ZDB-GENE-030131-4327	ppp1r13bb	ZDB-GENE-030131-4327	protein_coding	ensembl_havana_gene	ENSDART00000047662.8	ENSDART00000047662^ENSDART00000152119^ENSDART00000165224^ENSDART00000177048^ENSDART00000181524^ENSDART00000191952
ENSDARG00000009153		NNN	0.210097	0.316029	0.210097	0.898559		ENSDARG00000009153.9	phospholipase A2, group IB (pancreas)	ZDB-GENE-070117-1	pla2g1b	ZDB-GENE-070117-1	protein_coding	ensembl_havana_gene	ENSDART00000009323.9	ENSDART00000009323
ENSDARG00000009160		NNN	0.930158	0.993185	0.944823	0.930158		ENSDARG00000009160.9	kynurenine 3-monooxygenase	ZDB-GENE-030424-4	—	—	protein_coding	ensembl	ENSDART00000003706.8	ENSDART00000003706
[truncated: 30,367 more rows]
